# Supplementary material for: Development of High-Density Genetic Maps for Barley and Wheat Using a Novel Two-Enzyme Genotyping-by-Sequencing Approach
Source: PLoS One. 2012 Feb 28;7(2):e32253. doi: 10.1371/journal.pone.0032253 (PMC3289635; doi:10.1371/journal.pone.0032253)
Supplement: Dataset S2 — Genetic linkage map of Synthetic W9784×Opata M85 constructed using GBS SNP markers and AntMap algorithm. (XLSX) [file pone.0032253.s005.xlsx]

## Sheet: AntMap_imputed_20111214.txt
marker	cm	chr	rs	alleles	chrom	pos	strand	assembly	center	protLSID	assayLSID	panelLSID	QCcode	M6	Opata	SynOpDH0001	SynOpDH0003	SynOpDH0005	SynOpDH0006	SynOpDH0007	SynOpDH0008	SynOpDH0009	SynOpDH0010	SynOpDH0011	SynOpDH0014	SynOpDH0015	SynOpDH0017	SynOpDH0018	SynOpDH0019	SynOpDH0020	SynOpDH0021	SynOpDH0022	SynOpDH0023	SynOpDH0024	SynOpDH0026	SynOpDH0028	SynOpDH0029	SynOpDH0030	SynOpDH0031	SynOpDH0033	SynOpDH0034	SynOpDH0035	SynOpDH0038	SynOpDH0040	SynOpDH0042	SynOpDH0045	SynOpDH0046	SynOpDH0047	SynOpDH0048
*synopGBS1256	0	1A	TGCAGTGAGCGCCGATTGTGTTTTGTGGTGCTAACAGCGCTGAATAAGAGCCCCCGTCAAGCA	C/G	0	14699	-1	34	3	73	82	2	0.818182	A	B	-	A	B	B	B	A	A	B	A	B	B	B	B	A	A	A	B	B	A	B	A	A	B	B	A	B	A	A	A	B	B	A	-	B
*synopGBS661	0	1A	TGCAGCTTTTGTGGAACTAGATGACCTGGCTGTGCCAATGGCGCAAGAAGCGAATTAGAAGCG	C/A	0	9441	-1	50	3	92	82	5	0.903743	A	B	A	-	B	B	B	A	-	B	-	B	-	B	B	A	A	A	B	B	A	B	A	A	B	B	A	B	A	A	-	B	B	A	A	B
*synopGBS662	0	1A	TGCAGCTTTTGTGGAACTAGATGACCTGGTTGTGCCAATGGCGCAAGAAGAGAATTAGAAGCG	A/C	0	9442	-1	50	1	82	92	5	0.903743	A	B	A	-	B	B	B	A	-	B	-	B	-	B	B	A	A	A	B	B	A	B	A	A	B	B	A	B	A	A	-	B	B	A	A	B
*synopGBS308	1.79	1A	TGCAGATTATCAAGGGCTTATTTCCACCGCAGCTTATGTAGAAGCCATGGCTCAAAAGAACTG	A/C	0	3190	-1	5	1	75	87	3	0.850267	A	B	-	A	B	B	B	A	-	B	-	B	B	B	B	A	A	A	B	B	A	B	A	A	B	B	A	B	A	A	-	B	-	A	A	B
*synopGBS774	1.79	1A	TGCAGGCACGTCTGCCTCACTGCTAGAAGACACTTGGACTAACTCTGCCATGCCCTGCTGCTT	C/T	0	10552	-1	30	3	72	82	4	0.802139	A	B	-	A	B	B	B	A	A	B	A	B	B	B	B	A	A	A	B	B	A	B	A	-	-	B	A	B	A	A	A	B	A	A	A	B
*synopGBS775	1.79	1A	TGCAGGCACGTCTGCCTCACTGCTAGAAGACACTTGGACTAACTCTGCCATGCCCTGCTGCTT	A/C	0	10553	-1	31	3	72	82	4	0.802139	A	B	-	A	B	B	B	A	A	B	A	B	B	B	B	A	A	A	B	B	A	B	A	-	-	B	A	B	A	A	A	B	A	A	A	B
*synopGBS776	1.79	1A	TGCAGGCACGTCTGCCTCACTGCTAGAAGACACTTGGACTAACTCTGCCATGCCCTGCTGCTT	A/G	0	10554	-1	37	3	72	82	4	0.802139	A	B	-	A	B	B	B	A	A	B	A	B	B	B	B	A	A	A	B	B	A	B	A	-	-	B	A	B	A	A	A	B	A	A	A	B
*synopGBS477	26.48	1A	TGCAGCCTCGCCTACAGTGTGTAGTCAACATCAGGTTTGGCTGCTTGTGCTCCTGTGCCACCC	C/T	0	6436	-1	8	3	85	84	7	0.86631	A	B	B	A	A	B	B	A	B	B	A	B	B	B	B	A	B	A	B	-	A	B	A	B	A	B	A	A	A	A	A	B	A	A	A	B
*synopGBS1031	27.99	1A	TGCAGGTTTCGTTCCGCAATCAAGTTTCTCTACCATCCCAGGTCGTTCTCTCAGCATACGGCG	A/G	0	13052	-1	17	3	81	98	8	0.914439	A	B	B	A	A	A	B	A	B	B	A	B	B	B	B	A	B	A	B	A	A	B	A	B	A	B	A	A	A	A	A	B	A	A	A	B
*synopGBS665	27.99	1A	TGCAGGAAAATACTCAATTGCACTGCGGCAGAGGGCCAGGCCCATTGCCTATGTGCGAGACGT	C/G	0	9468	-1	25	3	92	75	3	0.877005	A	B	B	A	A	A	B	A	B	B	A	B	B	B	B	A	B	A	B	A	A	B	A	B	A	B	A	A	A	A	A	B	A	A	A	B
*synopGBS125	53.14	1A	TGCAGACCCGTGCGGAATCGTCCCAGCGCACGCACGCGCCTCTTGCCTGTCGGTCGAGTCGGT	A/T	0	1236	-1	56	3	96	64	7	0.818182	A	B	B	A	-	A	A	A	B	B	B	B	B	B	B	A	B	A	B	A	-	B	A	B	A	B	A	A	B	A	A	B	A	A	A	B
*synopGBS210	54.01	1A	TGCAGATAGCATGACTAGCTAGGGTCAGAATAGTTGCCCATGTCTTCCAAATCCCCTGTAGAT	A/G	0	2393	-1	7	2	75	105	11	0.903743	A	B	B	A	B	A	A	A	B	A	B	B	B	B	B	A	B	A	B	A	B	B	A	B	A	B	A	A	B	A	A	B	A	A	A	B
*synopGBS105	55.56	1A	TGCAGACACCCTTACAGCACAAGACGTCTCCTTCCTCGACCAATCCATACACGGCAGCTCACC	G/T	0	1029	-1	53	2	78	110	12	0.941176	A	B	B	A	B	A	A	A	B	A	B	B	B	B	B	A	B	A	B	A	B	B	A	B	A	B	A	A	B	A	A	B	A	A	A	B
*synopGBS510	64.67	1A	TGCAGCGCGTTCTCCTTGTCCATCAGGTTCGCCTTGAGCTCCGCGATGTCTGTGATCGACTTC	A/C	0	7199	-1	54	3	103	79	10	0.919786	A	B	B	A	B	A	A	A	B	A	B	B	B	B	B	A	B	A	B	A	B	B	A	B	A	B	A	A	B	A	A	B	A	A	A	B
*synopGBS1355	66.13	1A	TGCAGTTACTGCCTTGGAGCATCGCGACGACACGAACATCGCCCAACCATCCAAGCCCTGGAC	C/T	0	15525	-1	27	1	75	104	7	0.919786	A	B	B	A	B	A	A	A	B	A	B	B	B	B	B	A	B	A	B	A	B	B	A	B	A	B	A	A	B	A	A	B	A	A	A	B
*synopGBS854	68.29	1A	TGCAGGCTTCAGAGGACGCAGCACGGCCGAGGGCGGCAAGGAATCCTTCAAGGGAGCGCTCGG	C/T	0	11417	-1	16	1	105	79	10	0.930481	A	B	B	A	B	A	A	A	B	A	B	B	B	B	B	A	B	A	B	A	B	B	A	B	A	B	A	A	B	A	A	B	A	A	A	B
*synopGBS1486	77.66	1A	TGCAGTTTTCCGATCGGATATGTCAGCGGCGTCGAGGACCATGCATGGATCGGTTAAAGGTGA	A/T	0	16575	-1	57	2	87	79	14	0.812834	A	B	B	A	B	A	A	A	B	A	B	B	B	B	B	A	B	A	B	A	B	B	A	B	A	B	A	A	B	B	A	B	A	A	-	B
*synopGBS1200	78.56	1A	TGCAGTCGGGCCTGAACCTCCATGGCGCGCCGCCCCAAGCTCCGCCACCAGTCGCCTCAACCT	C/T	0	14359	-1	39	3	99	78	7	0.909091	A	B	B	A	B	A	A	A	B	A	B	B	B	B	B	A	B	A	B	A	B	B	A	B	A	B	A	A	B	B	A	B	A	A	B	B
*synopGBS387	78.56	1A	TGCAGCATCTTTTTGGTGAGACGCAGGCGGCCAGAACATCCGCCAATTATTTGGCATTCCCCG	A/G	0	4937	-1	37	3	72	82	3	0.807487	A	B	B	A	B	A	A	A	B	A	B	B	B	B	B	A	B	A	B	A	B	B	A	B	A	B	A	A	B	B	A	B	A	A	B	B
*synopGBS1313	80.36	1A	TGCAGTGGAGACGCACAAGGCGAAGAAGGCTTCGGACACGCCAAAGACTCATGAGGGCGCCCC	G/T	0	15085	-1	58	2	81	81	7	0.828877	A	B	A	A	B	A	A	A	B	A	B	B	-	B	B	A	B	A	B	A	B	B	A	B	A	B	A	A	B	B	A	B	A	A	B	B
*synopGBS1081	83.04	1A	TGCAGTACGCTTGAAGCGACACACGCAGTGTGATTTGGACTCGCGTTGGCTGAGCGGTCGTTG	A/G	0	13382	-1	20	3	85	72	7	0.802139	A	B	A	A	B	A	A	A	B	A	B	B	A	B	B	A	B	A	B	A	B	B	A	B	A	B	A	A	B	B	A	B	A	A	B	B
*synopGBS455	83.04	1A	TGCAGCCGAAAAAACTGATCTCATATTCGGATTCGGCAGATCATGTTGCCTCGGCGACGCATA	C/T	0	5967	-1	41	3	99	65	11	0.818182	A	B	A	A	B	A	A	A	B	A	B	B	A	B	B	A	B	A	B	A	B	B	A	B	A	B	A	A	B	B	A	B	A	A	B	B
*synopGBS74	83.04	1A	TGCAGAATGAATAGATATACACCCACCACCAACCCCAAGCCCACCGTACCCTTCTTCCATAGT	C/G	0	815	-1	44	3	87	71	8	0.802139	A	B	A	A	B	A	A	A	B	A	B	B	A	B	B	A	B	A	B	A	B	B	A	B	A	B	A	A	B	B	A	B	A	A	B	B
*synopGBS1107	83.97	1A	TGCAGTAGCATGGATAGGGCGAGGCGCAACTTGATGGCGTGTGTTGACTCGCTCCACTGCCGA	T/C	0	13543	-1	31	3	79	82	4	0.839572	A	B	A	A	B	A	A	A	B	A	B	B	A	B	B	A	B	A	B	A	B	B	A	B	A	B	A	A	B	B	A	B	A	A	B	B
*synopGBS1108	83.97	1A	TGCAGTAGCATGGATAGGTCGAGGCGCAACTCGATGGCGTGTGTTGACTCGCTCCACTGCCGA	C/T	0	13544	-1	31	1	82	79	4	0.839572	A	B	A	A	B	A	A	A	B	A	B	B	A	B	B	A	B	A	B	A	B	B	A	B	A	B	A	A	B	B	A	B	A	A	B	B
*synopGBS1321	83.97	1A	TGCAGTGGTCTCGCTCCCAGATTACTCAAACCTGAGCCTAAGTAGGCCGCTGTTGCGCTAGCT	G/T	0	15223	-1	19	3	77	80	7	0.802139	A	B	A	A	B	A	A	A	B	A	B	B	A	B	B	A	B	A	B	A	B	B	A	B	A	-	A	A	B	B	A	B	A	A	B	B
*synopGBS191	85.74	1A	TGCAGAGCATAGTTTTAAATAGTGAGCTATGCTAATTAGCGGCACACTGCTCAAACTGGTATA	A/G	0	1884	-1	28	3	86	78	7	0.839572	A	B	A	A	B	A	A	A	B	A	B	B	A	B	B	A	B	A	B	A	B	B	A	B	A	-	A	A	B	B	A	B	A	A	B	B
*synopGBS246	86.58	1A	TGCAGATCGATACCGTGTTGCTCCTGCTTGTTAAATGGCGCAGCGAACTTGATTCGGGATCCC	A/G	0	2704	-1	33	3	91	91	15	0.893048	A	B	A	A	B	A	A	A	B	A	B	B	A	B	B	A	B	A	B	A	B	B	A	B	A	-	A	A	B	B	A	B	A	A	B	B
*synopGBS1113	88.22	1A	TGCAGTAGCGTGGCGACGCGTTGGGAAGAGGCGCACATTCATCACGTTACGCGTTCAGTGCAC	C/T	0	13575	-1	63	1	85	91	9	0.893048	A	B	A	A	B	A	A	A	B	A	B	B	A	B	A	A	B	A	B	A	B	B	A	B	A	A	A	A	B	B	A	B	A	A	B	B
*synopGBS547	88.22	1A	TGCAGCTAGCTCTACGACGGACCAAACGTTGCCTCCACCCACCAGCCGCATTACCTGACGGCG	A/G	0	7867	-1	25	3	82	94	9	0.893048	A	B	A	A	B	A	A	A	B	A	B	B	A	B	A	A	B	A	B	A	B	B	A	B	A	A	A	A	B	B	A	B	A	A	B	B
*synopGBS372	89.02	1A	TGCAGCAGCTGCTCCTGAGAGCTCACACGGTCGTCGAGGAGGCGGATGGGCGATACATCACCA	A/T	0	4584	-1	6	1	74	90	6	0.84492	A	B	A	A	B	A	A	A	B	A	B	B	A	B	A	A	B	A	B	A	B	B	A	B	A	A	A	A	B	B	A	B	A	A	B	B
*synopGBS1010	95.32	1A	TGCAGGTTGACCATACCGCAGCAATGCCCAACTGGCTACAAGCTACAAAAATGACTACGGTAG	C/G	0	12939	-1	11	3	93	73	8	0.84492	A	B	A	A	B	A	B	A	B	A	B	B	A	B	A	A	B	A	B	A	B	B	A	A	A	A	A	A	B	B	A	B	A	A	B	B
*synopGBS940	96.19	1A	TGCAGGTAGGCTTCCAATCCTGAAGTTACATTTGCTCTGCTCAGTACTCGTGCATTTCTGCTC	A/G	0	12227	-1	45	3	87	78	9	0.834225	A	B	A	A	-	A	B	A	B	A	B	B	A	B	A	A	B	A	B	A	-	B	A	A	A	A	A	A	B	B	A	B	A	A	B	B
*synopGBS1451	101.65	1A	TGCAGTTGGTGTCGGTGCATGTGGCAATGGGTCAGCATCAGAAACTGTGCCCATGGAGGCGAA	C/T	0	16192	-1	12	3	83	89	10	0.86631	A	B	A	A	A	A	B	B	B	A	B	B	A	B	A	A	B	A	A	A	-	A	A	A	A	A	A	A	B	B	A	B	A	A	B	B
*synopGBS1452	101.65	1A	TGCAGTTGGTGTCGGTGCATGTGGCAATGGGTCAGCATCAGAAACTGTGCCCATGGAGGCGAA	T/C	0	16193	-1	27	3	83	89	10	0.86631	A	B	A	A	A	A	B	B	B	A	B	B	A	B	A	A	B	A	A	A	-	A	A	A	A	A	A	A	B	B	A	B	A	A	B	B
*synopGBS234	101.65	1A	TGCAGATCCTCCCCAGCAGCGCCGTGCGCCAGTTCTACGTCAGCATCAACGGCATGGAGTTGA	C/T	0	2655	-1	37	2	78	84	4	0.84492	A	B	A	A	A	A	B	B	B	A	B	B	A	B	A	A	B	A	A	A	A	A	A	A	A	A	A	A	B	B	A	B	A	A	B	B
*synopGBS988	107.49	1A	TGCAGGTTACCTTTGAGAGCATTATCATCCGAAAAAGCCTTTTACGTTCGCGTTCCATGCACA	G/A	0	12818	-1	63	3	92	85	10	0.893048	A	B	A	A	A	B	B	B	B	A	B	B	A	B	A	A	A	A	A	B	A	A	B	A	A	A	A	A	B	B	A	B	A	A	B	B
*synopGBS989	107.49	1A	TGCAGGTTACCTTTGAGAGCATTATCATCCGAAAAAGTCTTTTACGTTCGCGTTCCATGCACA	A/G	0	12819	-1	63	1	85	92	10	0.893048	A	B	A	A	A	B	B	B	B	A	B	B	A	B	A	A	A	A	A	B	A	A	B	A	A	A	A	A	B	B	A	B	A	A	B	B
*synopGBS456	121	1A	TGCAGCCGAAGCGCCGTGCCGTGAGCTTCGGATACAATCTCAAGAGCTACTCCCACAACTTCG	A/G	0	5980	-1	35	1	76	77	3	0.802139	A	B	A	A	A	B	-	B	B	A	B	B	A	-	B	B	A	A	-	B	A	A	-	A	A	A	A	A	B	A	-	B	A	A	B	B
*synopGBS263	153.51	1A	TGCAGATCTCTGTCCCAACACCGAGTCTGCATCATACATATTCACATCTGATAGCCCATAAGA	G/T	0	2788	-1	11	3	78	84	12	0.802139	A	B	A	A	A	B	A	B	B	A	B	B	A	A	A	B	A	A	-	B	-	A	-	A	A	B	A	A	B	B	B	B	A	A	B	B
*synopGBS1151	156.58	1A	TGCAGTCAATCGTCATTCAATTAAACTACTCCTTCTGTCCGACTAGCACGCGCTCTGGCGACT	T/C	0	13881	-1	32	3	82	93	6	0.903743	A	B	A	A	A	B	A	B	B	A	B	B	A	A	A	B	B	A	B	B	-	A	A	A	A	B	A	A	B	B	B	A	A	A	B	B
*synopGBS1275	156.58	1A	TGCAGTGCAGTACAGTAGTGAGTAGTTCATTGCTGCCCTTCAGAAGATCGGCCACGGCAGAGG	C/T	0	14845	-1	51	3	84	86	8	0.86631	A	B	A	A	A	B	A	B	B	A	B	B	A	A	A	B	B	A	B	B	B	A	A	A	A	B	A	A	B	B	B	A	A	A	B	B
*synopGBS376	156.58	1A	TGCAGCATAAGCTTGGGCTAACTGATAAACTAAACTCGATTGACAATCTGTCTTCGACGGCTC	C/T	0	4793	-1	34	3	76	81	7	0.802139	A	B	A	A	A	B	A	B	B	A	B	B	A	A	A	B	B	A	B	B	B	A	A	A	A	B	A	A	B	B	B	A	A	A	B	B
*synopGBS1443	164.59	1A	TGCAGTTGCTGTCATTCGAGATGGCAGCGCGACGCTGAAGATTGACACCCAACACCTGAGGGA	A/G	0	16118	-1	51	1	75	84	9	0.802139	A	B	A	A	A	B	A	B	B	A	B	B	A	A	A	B	B	A	B	B	B	A	A	A	A	B	B	A	B	A	B	A	A	A	B	B
*synopGBS942	164.59	1A	TGCAGGTAGTTGGGCAGCGGCGAACGCGGGCTGGGCGGGCCACCACATGGACGTCAAGTCCGC	C/T	0	12253	-1	26	3	95	72	10	0.839572	A	B	A	A	A	B	A	B	B	A	B	B	B	A	A	B	B	A	B	B	B	A	A	A	A	B	B	A	B	A	B	A	A	A	B	B
*synopGBS976	164.59	1A	TGCAGGTCTGGCAGGAGCAACGGTAAGGCCAGCAGTGTCGGGAGTCACGTCGGAGCTGCCTTC	A/G	0	12517	-1	12	3	76	88	4	0.855615	A	B	A	A	A	B	A	B	B	A	B	B	-	A	A	B	B	A	B	B	B	A	A	A	A	B	B	A	B	A	B	A	A	A	B	B
*synopGBS977	164.59	1A	TGCAGGTCTGGCAGGAGCAACGGTAAGGCCAGCAGTGTCGGGAGTCACGTCGGAGCTGCCTTC	T/C	0	12518	-1	35	3	76	88	4	0.855615	A	B	A	A	A	B	A	B	B	A	B	B	-	A	A	B	B	A	B	B	B	A	A	A	A	B	B	A	B	A	B	A	A	A	B	B
*synopGBS1344	165.46	1A	TGCAGTGTTCATCTGCCCCTTTTCGGAGATAACCTGTGTTCCAACAGCCAGTGATGTTTTGGG	A/G	0	15417	-1	43	3	91	81	7	0.882353	A	B	A	A	A	B	A	B	B	A	B	B	A	A	A	B	B	A	B	B	B	A	A	A	A	B	B	A	B	A	B	A	A	A	B	B
*synopGBS402	167.81	1A	TGCAGCATTTGTGTAGTTAGTTAGTTAGGGCATCTTTAAGGCGGATCCGTAAACCCCCCGCAA	C/T	0	5114	-1	55	3	97	79	9	0.893048	A	B	A	A	A	B	A	B	B	B	B	B	A	A	A	B	B	A	B	B	B	A	A	A	A	B	B	A	B	A	B	A	A	A	B	B
*synopGBS899	170.12	1A	TGCAGGGGATGCCGCTCCACAGACAACAGTCATGGTGTCGTTGCTGCCATGATGCGAGGCGAT	G/A	0	11858	-1	13	3	107	79	12	0.930481	A	B	A	-	A	B	A	B	B	B	B	A	A	A	A	B	B	A	B	B	B	A	A	A	A	B	B	A	B	A	B	A	A	A	B	B
*synopGBS982	170.12	1A	TGCAGGTGATGCCACTCCACAGACAACAGTCATGGTGTCGTTGCTGCCATGATGCGAGGCGAT	A/G	0	12585	-1	13	1	79	102	7	0.930481	A	B	A	-	A	B	A	B	B	B	B	A	A	A	A	B	B	A	B	B	B	A	A	A	A	B	B	A	B	A	B	A	A	A	B	B
*synopGBS1442	1.96	1B	TGCAGTTGCTCTAGATCGAGAATTGTTGGGACCTGCGGCGTAGGGGGACTGCTTGGGGTCGAG	A/G	0	16102	-1	30	3	76	83	8	0.807487	A	B	B	B	A	A	A	A	A	B	A	-	-	A	-	A	A	-	-	-	A	-	A	-	B	-	A	B	-	B	B	A	A	A	B	A
*synopGBS1489	1.96	1B	TGCAGTTTTTCGAGATTTTTAGTCAAACTCAATGTGCTTAGTTTGCAGTGTAGTAGTAGGAAG	C/G	0	16647	-1	29	3	67	92	5	0.823529	A	B	B	B	A	A	A	A	A	B	A	-	A	A	B	A	A	B	B	B	A	B	A	B	B	B	A	B	B	B	B	A	A	A	B	A
*synopGBS691	2.93	1B	TGCAGGAATCTACGCTTGAGCTCCATCTAGTTCGTCCCAGCAGACGAACTTGAGGGGGATCGG	C/T	0	9713	-1	12	3	73	88	11	0.802139	A	B	B	B	A	A	A	A	A	B	A	-	A	A	B	A	A	B	B	B	A	B	A	B	B	B	A	B	B	B	B	A	A	A	B	A
*synopGBS1366	8.94	1B	TGCAGTTATAGCCAGGCCCATTGGTGGAGTCGAGGCAGTCGCTGTGATCACTGACACAGGCGG	A/G	0	15577	-1	7	3	69	91	4	0.834225	A	B	B	B	A	A	A	A	A	B	A	B	A	A	B	A	A	B	B	B	A	B	A	B	B	B	A	B	B	B	A	A	A	A	B	A
*synopGBS1378	13.75	1B	TGCAGTTCAAGTCCGTGACGCATAATGCCTATGTGGCTGCCGAGCAGGGGGGCGGCGGCGCCC	C/T	0	15668	-1	7	3	76	95	13	0.84492	A	B	B	B	A	B	A	A	A	B	A	B	A	A	B	B	A	B	B	B	A	B	A	B	B	B	A	B	B	B	-	A	A	A	-	A
*synopGBS260	16.72	1B	TGCAGATCTCAACGCAGTCAGCACACAACTGTGCTCCAGATTTTCACATGCTAAATCCAGATA	A/T	0	2774	-1	10	3	109	64	14	0.850267	A	B	B	B	-	B	A	A	A	B	A	B	A	A	B	A	A	B	B	B	A	B	A	B	B	B	A	B	B	B	B	A	A	A	A	A
*synopGBS375	26.86	1B	TGCAGCAGGTCATCGGGGAGATTACGACAATCGTTGGTTCTGTGGAGGCAGACTAACATAATT	C/T	0	4697	-1	27	3	110	48	8	0.802139	A	B	B	B	B	B	A	A	A	B	B	B	A	A	B	B	A	B	B	B	A	B	A	B	B	B	A	B	B	B	B	A	A	B	A	A
*synopGBS1417	35.21	1B	TGCAGTTGAGGAAGAACCAGCAAATGAATATCACATCCGAGAAAAGGAAGAACTACCAGCAAC	A/C	0	15992	-1	22	3	86	75	2	0.850267	A	B	B	B	A	B	A	A	A	B	-	B	A	A	B	B	A	B	B	B	A	B	A	B	B	B	A	B	B	B	A	A	A	B	A	A
*synopGBS1467	35.21	1B	TGCAGTTTCAGGCTACTTCTTCGAAATCAGTAGGGGATGCTCGAAGAACCCATCCTCCGTGAG	G/C	0	16372	-1	32	1	71	100	6	0.882353	A	B	B	B	A	B	A	A	A	B	A	B	A	A	B	B	A	B	B	B	A	B	A	B	B	B	A	B	B	B	A	A	A	B	A	A
*synopGBS267	37.42	1B	TGCAGATCTTCAGGCATTGGTTCTCCATTTGACGCCGCCACTTCCTCGGCCACTCCTAGAGCC	A/G	0	2815	-1	31	3	95	83	8	0.909091	A	B	B	B	A	B	A	A	A	B	A	B	A	A	B	B	A	B	B	B	A	B	A	B	B	B	A	B	B	B	A	A	A	B	A	A
*synopGBS1430	40.67	1B	TGCAGTTGCACCCGTGCCTTCTGGAGCCACTAGCACGTTGCGACTCCAGAGGCGCTGCTGATA	C/G	0	16031	-1	16	3	78	83	7	0.823529	A	B	B	B	A	B	A	A	A	B	A	B	A	A	B	B	A	B	B	B	A	-	A	B	B	B	A	B	B	B	A	B	A	B	A	A
*synopGBS961	44.41	1B	TGCAGGTCCCACGGCGTGAGGTGCACCGTCTCAGTCGACTTTGGTTTCGTCGCCGTCGTCTCC	C/G	0	12387	-1	35	3	71	90	5	0.834225	A	B	B	B	A	B	A	A	A	B	A	B	A	-	B	B	B	B	B	B	A	A	A	-	B	B	A	B	B	B	A	B	A	B	A	A
*synopGBS962	44.41	1B	TGCAGGTCCCACGGCGTGAGGTGCACCGTCTCAGTCGACTTTGGTTTCGTCGCCGTCGTCTCC	C/T	0	12388	-1	52	3	71	90	5	0.834225	A	B	B	B	A	B	A	A	A	B	A	B	A	-	B	B	B	B	B	B	A	A	A	-	B	B	A	B	B	B	A	B	A	B	A	A
*synopGBS1201	56.07	1B	TGCAGTCGGTGGCGAGGCCCTAAGCTTCACGGGGATGGCGTACGTGTATGAAGCCGAAATCAC	C/T	0	14365	-1	12	3	98	62	8	0.812834	A	B	B	B	A	B	A	A	A	B	A	A	A	B	B	B	B	B	B	B	A	A	A	A	B	A	A	B	B	B	A	B	A	B	A	A
*synopGBS19	58.8	1B	TGCAGAAAGCAAAGCTGCCTCTGCATCTGCGTACAACGCTAGATCCATCTTAACTCGCGGGAA	C/T	0	189	-1	9	3	85	90	9	0.887701	A	B	B	B	A	B	A	A	A	B	A	A	A	B	B	B	B	B	B	B	A	A	A	A	B	A	A	B	B	B	A	B	A	B	A	A
*synopGBS56	59.6	1B	TGCAGAAGCGTTGAATCGATTCCTTGGTGCGCGGCGATTGCCGAGGGGAGCGAGATGGCACGG	C/T	0	628	-1	58	1	95	85	10	0.909091	A	B	B	B	A	B	A	A	A	B	A	A	A	B	B	B	B	B	B	B	A	A	A	A	B	A	A	B	B	B	A	B	A	B	A	A
*synopGBS188	60.45	1B	TGCAGAGCAAGTTCAGGAAAGCTGCCAGGAAGAGCAGGCAAGAGTTCGACGCCATTGATGGAA	A/G	0	1846	-1	40	2	79	83	4	0.84492	A	B	B	B	A	B	A	A	A	B	A	A	A	B	B	B	B	B	B	B	A	A	A	A	B	A	A	B	B	B	A	B	A	B	A	A
*synopGBS189	60.45	1B	TGCAGAGCAAGTTCAGGAAAGCTGCCAGGAAGAGCAGGCAAGAGTTCGACGCCATTGATGGAA	G/A	0	1847	-1	43	2	79	83	4	0.84492	A	B	B	B	A	B	A	A	A	B	A	A	A	B	B	B	B	B	B	B	A	A	A	A	B	A	A	B	B	B	A	B	A	B	A	A
*synopGBS222	60.45	1B	TGCAGATCAGAACAGATATAGCTCGAGGGAAACTAGTGAACTGAACGTTGGCATTTATTAAAA	G/A	0	2517	-1	50	3	82	73	5	0.802139	A	B	B	B	A	B	A	A	A	B	A	A	A	B	B	B	B	B	B	B	A	A	A	A	B	A	A	B	B	B	A	B	A	B	A	A
*synopGBS223	60.45	1B	TGCAGATCAGAACAGATATAGCTCGAGTGAAACTAGTGAACTGAACGTTGACATTTATTAAAA	A/G	0	2518	-1	50	1	73	82	5	0.802139	A	B	B	B	A	B	A	A	A	B	A	A	A	B	B	B	B	B	B	B	A	A	A	A	B	A	A	B	B	B	A	B	A	B	A	A
*synopGBS320	60.45	1B	TGCAGATTGCATGCATGGCCCTCTGTAGAGTAGAGTGGAAGTGCAGATTGCACGCCGATGCTC	G/C	0	3290	-1	32	3	77	80	5	0.812834	A	B	B	B	A	B	A	A	A	B	A	A	A	B	B	B	B	B	B	B	A	A	A	A	B	A	A	B	B	B	A	B	A	B	A	A
*synopGBS321	60.45	1B	TGCAGATTGCATGCATGGCCCTCTGTAGAGTAGAGTGGAAGTGCAGATTGCACGCCGATGCTC	G/A	0	3291	-1	40	3	77	80	5	0.812834	A	B	B	B	A	B	A	A	A	B	A	A	A	B	B	B	B	B	B	B	A	A	A	A	B	A	A	B	B	B	A	B	A	B	A	A
*synopGBS408	62.22	1B	TGCAGCCAACCCCTGCTACTCCCATGTCCCACCAACCTCGCGCCTCGACCTAGCTAAGCCCCC	C/G	0	5158	-1	48	3	81	75	5	0.807487	A	B	B	B	A	B	A	A	A	B	A	A	A	B	B	B	B	B	B	B	A	A	A	A	B	A	A	B	B	B	A	B	A	B	A	A
*synopGBS434	63.12	1B	TGCAGCCATCCGCTCTGTGTATAAGCCATAACAAAGAAACTGAGCATACTCCTACCCTAGTCT	C/T	0	5530	-1	10	1	71	84	5	0.802139	A	B	B	B	A	B	A	A	A	B	A	A	A	B	B	B	B	B	B	B	A	A	A	A	B	A	A	B	B	B	A	B	A	B	A	A
*synopGBS664	64.04	1B	TGCAGGAAAACACCTTCAGGCAAGCCATAGCAGAGAAGCGGAGGCGCAGGGCGAGCCGTAGCC	A/G	0	9462	-1	47	3	76	86	3	0.850267	A	B	B	B	A	B	A	A	A	B	A	A	A	B	B	B	B	B	B	B	A	A	A	A	B	A	A	B	B	B	A	B	A	B	A	A
*synopGBS688	64.89	1B	TGCAGGAAGTACCGAAACAGTACGAGCGCTTGCCGCGGGCGATGCAGGGGAACCTCATGGCCG	A/G	0	9675	-1	41	3	81	81	3	0.850267	A	B	B	B	A	B	A	A	A	B	A	A	A	B	B	B	B	B	B	B	A	A	A	A	B	A	A	B	B	B	A	B	A	B	A	A
*synopGBS828	64.89	1B	TGCAGGCGTGAAGAAAATTTAAGGACGGTATAAGTGCACCTAAACAAAGCTCTCACAGCGATT	C/T	0	11232	-1	53	3	91	73	3	0.860963	A	B	B	B	A	B	A	A	A	B	A	A	A	B	B	B	B	B	B	B	A	A	A	A	B	A	A	B	B	B	A	B	A	B	A	A
*synopGBS967	64.89	1B	TGCAGGTCGAGGCCATGCCACGCCCTCTCATCGCCGTCGCGGCTGAGCCAAAGCCAGGGCGTG	A/G	0	12437	-1	14	3	86	76	3	0.850267	A	B	B	B	A	B	A	A	A	B	A	A	A	B	B	B	B	B	B	B	A	A	A	A	B	A	A	B	B	B	A	B	A	B	A	A
*synopGBS1149	65.75	1B	TGCAGTCAATAATCCCATACTCACCTCGCTTGGCAGAAGAGAGACTTTCTTCCAGGGATAAAC	C/T	0	13879	-1	62	3	75	80	2	0.818182	A	B	B	B	A	B	A	A	A	B	A	A	A	B	B	B	B	B	B	B	A	A	A	A	B	A	A	B	B	B	A	B	A	B	A	A
*synopGBS1150	65.75	1B	TGCAGTCAATAATCCCATACTCACCTCGCTTGGCAGAAGAGAGACTTTCTTCCAGGGATAAAC	G/A	0	13880	-1	63	3	75	80	2	0.818182	A	B	B	B	A	B	A	A	A	B	A	A	A	B	B	B	B	B	B	B	A	A	A	A	B	A	A	B	B	B	A	B	A	B	A	A
*synopGBS1210	66.56	1B	TGCAGTCGTTTGGTTCAGAAGCTTTCAGGTGCTCTAGTCTTGACGTTTCTCGAAATTGGCGGG	G/T	0	14421	-1	58	3	85	96	10	0.914439	A	B	B	B	A	B	A	A	A	B	A	A	A	B	B	B	B	B	B	B	A	A	A	A	B	A	A	B	B	B	A	B	A	B	A	A
*synopGBS1238	66.56	1B	TGCAGTGAAACACGGAAAATATCTCGATAGCTCTAGGCGGAAACTCACCGCCCCCCGCCATGC	C/G	0	14592	-1	62	3	89	80	6	0.871658	A	B	B	B	A	B	A	A	A	B	A	A	A	B	B	B	B	B	B	B	A	A	A	A	B	A	A	B	B	B	A	B	A	B	A	A
*synopGBS1335	66.56	1B	TGCAGTGTGAGCTGCCCCAACAAGAGACACCGCAACATGCCATACCAATAACTCAGGCCCTTA	C/T	0	15353	-1	16	3	92	80	6	0.887701	A	B	B	B	A	B	A	A	A	B	A	A	A	B	B	B	B	B	B	B	A	A	A	A	B	A	A	B	B	B	A	B	A	B	A	A
*synopGBS1395	66.56	1B	TGCAGTTCCGTCGTTCTACGAGCCACCTCGTTGGGGTGATGGATACCGATTCTTTGATCCCTC	C/G	0	15800	-1	25	3	90	83	5	0.898396	A	B	B	B	A	B	A	A	A	B	A	A	A	B	B	B	B	B	B	B	A	A	A	A	B	A	A	B	B	B	A	B	A	B	A	A
*synopGBS1396	66.56	1B	TGCAGTTCCGTCGTTCTACGAGCCACCTCGTTGGGGTGATGGATACCGATTCTTTGATCCCTC	G/A	0	15801	-1	35	3	90	83	5	0.898396	A	B	B	B	A	B	A	A	A	B	A	A	A	B	B	B	B	B	B	B	A	A	A	A	B	A	A	B	B	B	A	B	A	B	A	A
*synopGBS1397	66.56	1B	TGCAGTTCCGTCGTTCTACGAGCCACCTCGTTGGGGTGATGGATACCGATTCTTTGATCCCTC	C/T	0	15802	-1	62	3	90	83	5	0.898396	A	B	B	B	A	B	A	A	A	B	A	A	A	B	B	B	B	B	B	B	A	A	A	A	B	A	A	B	B	B	A	B	A	B	A	A
*synopGBS1407	68.26	1B	TGCAGTTCGGGGGACACACGCACCTGATACAGAAGAGTGCAATTGCCATCCCAAATGCGAGTA	G/T	0	15868	-1	25	3	75	84	7	0.812834	A	B	B	B	A	B	A	A	A	B	A	A	A	B	B	B	B	B	B	B	A	A	A	A	B	A	A	B	B	B	A	B	A	B	A	A
*synopGBS1409	68.26	1B	TGCAGTTCTCCAAGCAGGGGCTGATGCTTCCCCACGTGTTGGCAGCATTGAACCGATGCGTCG	C/T	0	15904	-1	58	3	91	92	6	0.946524	A	B	B	B	A	B	A	A	A	B	A	A	A	B	B	B	B	B	B	B	A	A	A	A	B	A	A	B	B	B	A	B	A	B	A	A
*synopGBS1103	69.05	1B	TGCAGTAGATTCTTACCAAGCCGAGCGAGCTGTTTCGTGTAAAATCCTCGCGTCCATCACCAG	A/G	0	13519	-1	55	3	89	75	7	0.839572	A	B	B	B	A	B	A	A	A	B	A	A	A	B	B	B	B	B	B	B	A	A	A	A	B	A	A	B	B	B	A	B	A	B	A	A
*synopGBS282	69.88	1B	TGCAGATGCCACAACATGGGGAGGCGGGATGCTGTACCACTGGAGATACCAAGAGAGGAGCAC	A/C	0	2947	-1	63	3	97	78	9	0.887701	A	B	B	B	A	B	A	A	A	B	A	A	A	B	B	B	B	B	B	B	A	A	A	A	B	A	A	B	B	B	A	B	A	B	A	A
*synopGBS486	72.43	1B	TGCAGCCTGCATGAGCTAACTGGAGTAGTTCTTGAATGATAAGGTTCCTTGACAAGGCGGCCA	C/T	0	6515	-1	47	3	81	80	3	0.84492	A	B	B	B	A	B	A	A	A	B	A	A	A	B	B	B	B	B	B	B	A	A	A	A	B	A	A	B	B	B	A	B	A	B	A	A
*synopGBS1429	75.91	1B	TGCAGTTGCAAATTGGGAGCATTGACCAACAGGAGCCACGGCTAACTGCGGACCAGCGCGTTT	C/T	0	16027	-1	38	3	87	90	5	0.919786	A	B	B	B	A	B	A	A	A	A	A	A	A	B	B	B	B	B	B	B	A	A	A	A	B	A	A	B	B	B	A	B	A	B	A	A
*synopGBS546	75.91	1B	TGCAGCTAGCGCAGTCGCGACATGTTGCAGGAACCCAGCTCCCGAGCCTCTCACATCGCCAGC	C/T	0	7854	-1	42	3	89	86	6	0.903743	A	B	B	B	A	B	A	A	A	A	A	A	A	B	B	B	B	B	B	B	A	A	A	A	B	A	A	B	B	B	A	B	A	B	A	A
*synopGBS59	75.91	1B	TGCAGAAGGGATGGGGATGCGAACATATGAAGCAAGACATGAGGGCGAGGAGTTCTGAGGCGG	C/G	0	665	-1	19	3	80	83	4	0.850267	A	B	B	B	A	B	A	A	A	A	A	A	A	B	B	B	B	B	B	B	A	A	A	A	B	A	A	B	B	B	A	B	A	B	A	A
*synopGBS676	75.91	1B	TGCAGGAACTGGCTTTGGGTCGGGCACTTCGAACGACCTTCTCAGCACGGAGCTTGACCGCTC	A/G	0	9601	-1	7	3	84	81	2	0.871658	A	B	B	B	A	B	A	A	A	A	A	A	A	B	B	B	B	B	B	B	A	A	A	A	B	A	A	B	B	B	A	B	A	B	A	A
*synopGBS1051	76.71	1B	TGCAGTAACTGAGCAATCAGAGAAGAGGTCAAGCGATCCGACAATCACTAGAGCTCCACACGC	C/T	0	13183	-1	62	3	83	83	6	0.855615	A	B	B	B	A	B	A	A	A	A	A	A	A	B	B	B	B	B	B	B	A	A	A	A	B	A	A	B	B	B	A	B	A	B	A	A
*synopGBS1089	76.71	1B	TGCAGTAGAAATCAGGGAGCCGTCACGGTCACATGCATCTCTCGGACAAAATAGTCAAGGGGC	G/A	0	13473	-1	63	2	93	90	11	0.919786	A	B	B	B	A	B	A	A	A	A	A	A	A	B	B	B	B	B	B	B	A	A	A	A	B	A	A	B	B	B	A	B	A	-	A	A
*synopGBS1090	76.71	1B	TGCAGTAGAAATCAGTGAGCCGTCACGGTCACATGCATCTCTCGGACAAAATAGTCAAGGGGC	A/G	0	13474	-1	63	1	90	93	11	0.919786	A	B	B	B	A	B	A	A	A	A	A	A	A	B	B	B	B	B	B	B	A	A	A	A	B	A	A	B	B	B	A	B	A	-	A	A
*synopGBS1482	79.19	1B	TGCAGTTTTAGGGGTCTTTTTCTTCAGCACATGGTCACGGGATCAGACTGTAGAAGAATACAT	A/G	0	16541	-1	57	2	78	83	6	0.828877	A	B	B	B	A	B	A	A	-	A	A	A	A	B	B	A	B	B	B	B	A	A	A	A	B	A	A	B	B	B	A	B	A	-	A	A
*synopGBS1086	83.82	1B	TGCAGTACTGCTAAATTGTTGTACAAATTCTGCATTTCAATCGTCTCGAGAGATCGACCATGC	C/T	0	13438	-1	57	2	81	74	5	0.802139	A	B	B	B	A	B	A	A	-	A	A	A	A	B	B	A	B	B	B	B	A	A	A	A	B	A	A	B	B	B	A	B	A	-	A	A
*synopGBS1271	83.82	1B	TGCAGTGCACCCCTCCATCGCACGCAAACTCTACGCCATAAAGACCGCACAGCATACGCGTAC	A/G	0	14801	-1	40	3	71	87	4	0.823529	A	B	B	B	A	B	A	A	B	A	A	A	A	B	B	A	B	B	B	B	A	A	A	A	B	A	A	B	B	B	A	B	A	-	A	A
*synopGBS1209	90.46	1B	TGCAGTCGTTGTTGTTCGTGACTCGTGAGACGACCAAAGGTTATAGGCACTATGTGCCCATGC	A/G	0	14417	-1	44	3	83	73	5	0.807487	A	B	B	B	A	B	A	A	B	A	A	A	A	B	B	A	B	B	B	B	A	A	A	A	B	A	A	B	B	B	A	B	A	-	A	A
*synopGBS494	90.46	1B	TGCAGCCTTCCACACGCTATTCACGTCGTAGTCACCTTGCATGCGTGCATCCACCACACCCTC	C/G	0	6583	-1	62	3	80	76	2	0.823529	A	B	B	B	A	B	A	A	B	A	A	A	A	B	B	A	B	B	B	B	A	A	A	A	B	A	A	B	B	B	A	B	A	-	A	A
*synopGBS495	90.46	1B	TGCAGCCTTCCACACGCTATTCACGTCGTAGTCACCTTGCATGCGTGCATCCACCACACCCTC	C/G	0	6584	-1	63	3	80	76	2	0.823529	A	B	B	B	A	B	A	A	B	A	A	A	A	B	B	A	B	B	B	B	A	A	A	A	B	A	A	B	B	B	A	B	A	-	A	A
*synopGBS572	93.52	1B	TGCAGCTCAGAGAAGTGCATGATGGCGACGTACCCTGGCGACGGGGCATTGGGCTGGGGCCTC	A/G	0	8083	-1	8	3	71	92	4	0.850267	A	B	B	B	A	B	A	A	B	A	A	A	A	B	B	A	B	A	B	B	B	A	A	A	B	A	A	B	B	B	A	B	A	A	B	A
*synopGBS657	93.52	1B	TGCAGCTTTTCATCGCATTCTTCACAGTCAAGAATCCTCTCCATGGTGCTGATCGCTTCCTTA	C/T	0	9418	-1	48	3	73	80	3	0.802139	A	B	B	B	A	B	A	A	B	A	A	A	A	B	B	A	B	A	B	B	B	A	A	A	B	A	A	B	B	B	A	B	A	A	B	A
*synopGBS140	94.43	1B	TGCAGACCTGGACGCGGACGCGCGCCTCGTCGGCGAGCTCCACGGGGACGCTGGCCACGTCCT	A/G	0	1311	-1	56	2	76	83	6	0.818182	A	B	B	B	A	B	A	A	B	A	A	A	A	B	B	A	B	A	B	B	B	A	A	A	B	A	A	B	B	B	A	B	A	A	B	A
*synopGBS1274	96.17	1B	TGCAGTGCAGGGTTTAGTCCGCACTCTCCAATGAGCCGCTCTCTGTCGTGCTCCCAGGCGCCG	C/T	0	14842	-1	18	3	76	93	5	0.877005	A	B	B	B	A	B	A	A	B	A	A	A	A	B	B	A	B	A	B	B	B	A	A	A	B	A	A	B	B	B	A	B	A	A	B	A
*synopGBS361	97.01	1B	TGCAGCACGTCTGTCAGCTCCTTCACCGCCACCACGGTGGTCTTGTCAAGCACGCCGCGGGAC	C/T	0	4170	-1	10	2	73	86	6	0.818182	A	B	B	B	A	B	A	A	B	A	A	A	A	B	B	A	B	A	B	B	B	A	A	B	B	A	A	B	B	B	A	B	A	A	B	A
*synopGBS981	97.01	1B	TGCAGGTGACACGAGGCATCTTTGAAGCACTAGTAAAAAACAGGCCTATCGTTCGGGCCTGGC	C/G	0	12551	-1	44	2	80	78	5	0.818182	A	B	B	B	A	B	A	A	B	A	A	A	A	B	B	A	B	A	B	B	B	A	A	B	B	A	A	B	B	B	A	B	A	A	B	A
*synopGBS255	97.83	1B	TGCAGATCGTACCTATCGGCCGCGACAAGCAGGCGCAGCCATTGCCATATCGCATCTTCACCA	A/G	0	2744	-1	26	3	86	94	8	0.919786	A	B	B	B	A	B	A	A	B	A	A	A	A	B	B	A	B	A	B	B	-	A	A	B	B	A	A	B	B	B	A	B	A	A	B	A
*synopGBS573	101.22	1B	TGCAGCTCAGCGCGGAGGCAATCAAGTGACAAGTATGTTCATTAGAACCATTTGGAATAGGAC	A/G	0	8088	-1	23	3	76	85	6	0.828877	A	B	B	B	A	B	A	A	A	A	A	A	A	B	B	A	B	A	B	B	A	A	A	B	B	A	A	B	B	B	A	B	A	A	B	A
*synopGBS1062	106.59	1B	TGCAGTACAATTTTGTTCGTCGATTTTGTTGCGTGCCGACGTAAATGCCGAAGATGGGGAATT	C/T	0	13292	-1	17	3	91	94	11	0.930481	A	B	B	B	A	B	A	A	A	A	A	A	A	B	B	A	B	A	B	B	A	A	A	B	B	A	A	B	B	B	A	B	B	A	B	A
*synopGBS1063	106.59	1B	TGCAGTACAATTTTGTTCGTCGATTTTGTTGCGTGCCGACGTAAATGCCGAAGATGGGGAATT	C/G	0	13293	-1	20	3	91	94	11	0.930481	A	B	B	B	A	B	A	A	A	A	A	A	A	B	B	A	B	A	B	B	A	A	A	B	B	A	A	B	B	B	A	B	B	A	B	A
*synopGBS151	110.16	1B	TGCAGACGCCTCCGCCGCTCGTACGTTTAAAGAAGGAAATAGAAGGCGTGTTACAGACGTCGA	A/G	0	1407	-1	42	2	78	79	6	0.807487	A	B	B	B	A	B	A	A	A	A	A	A	A	B	B	A	B	A	B	B	A	A	A	B	B	A	B	B	B	B	A	B	B	A	B	A
*synopGBS214	111.09	1B	TGCAGATATAGCCAGGAGCAACTATTGCGTTGACACAAGAGCTGTTGCCGCTGACGCAAGCGT	A/G	0	2420	-1	23	2	77	86	4	0.850267	A	B	B	B	A	B	A	A	A	A	A	A	A	B	B	A	B	A	B	B	A	A	A	B	B	A	B	B	B	B	A	B	B	A	B	A
*synopGBS600	111.09	1B	TGCAGCTCGTCGGCCGTGCTCTCCGACTGTCGTGCCTCTCGGCCAGCAGCCAGATCTCCATCT	C/T	0	8423	-1	42	3	83	77	4	0.834225	A	B	B	B	A	B	A	A	A	A	A	A	A	B	B	A	B	A	B	B	A	A	A	B	B	A	B	B	B	B	A	B	B	A	B	A
*synopGBS1058	111.99	1B	TGCAGTAATCTTGCTACTGCGAGGAGCCTTTCTAGCTAAATGTCACATCTAATGTGGTTGTTT	G/T	0	13244	-1	12	3	84	88	4	0.898396	A	B	B	B	A	B	A	A	A	A	A	A	A	B	B	A	B	A	B	B	A	A	A	B	B	A	B	B	B	B	A	B	B	A	B	A
*synopGBS133	111.99	1B	TGCAGACCGCATTGGGAGCTTGCTGCCAGAGCATTGGAAGATCCCTGCACACCGACGGGCATC	C/T	0	1266	-1	42	3	77	76	3	0.802139	A	B	B	B	A	B	A	A	A	A	A	A	A	B	B	A	B	A	B	B	A	A	A	B	B	A	B	B	B	B	A	B	B	A	B	A
*synopGBS301	111.99	1B	TGCAGATGTGGTTGAGCGCGTACTCGTCTGCAACTTCAGTGACTCATCGTTTGATCATCATCT	C/T	0	3119	-1	18	1	71	94	6	0.850267	A	B	B	B	A	B	A	A	A	A	A	A	A	B	B	A	B	A	B	B	A	A	A	B	B	A	B	B	B	B	A	B	B	A	B	A
*synopGBS538	111.99	1B	TGCAGCTACTGCTATGTAGCTTCGCTCTACTTCCCCACAACCCACCAGATACATGCAGACTTG	C/T	0	7807	-1	5	3	78	85	4	0.850267	A	B	B	B	A	B	A	A	-	A	A	A	A	B	B	A	B	A	B	B	A	A	A	B	B	A	B	B	B	B	A	B	B	A	B	A
*synopGBS1404	123.97	1B	TGCAGTTCCTTGGCTCCACGAAGTTACCGATGTGGAACTCCGTTTGGGGTGCTTGGGCGCCGA	A/G	0	15829	-1	21	3	72	90	2	0.855615	A	B	B	B	A	B	A	A	-	A	A	A	A	B	B	A	B	A	B	B	A	A	A	B	B	A	B	B	B	B	A	B	B	A	B	A
*synopGBS627	123.97	1B	TGCAGCTTCACAAAAGGTTGGCATTACTTGTCCATCGACTGTTCATAGGGCTTCATAGCTGGT	A/G	0	9077	-1	54	3	78	82	5	0.828877	A	B	B	B	A	B	A	A	B	A	A	A	A	B	B	A	B	A	B	B	A	A	A	B	B	A	B	B	B	B	A	B	B	A	B	A
*synopGBS413	125.88	1B	TGCAGCCAAGGGTCCGTAGACAGAAGTGGGTGCTAATTAGAGTCTCTGGAGCAATGCTACCAA	C/T	0	5200	-1	20	3	68	84	2	0.802139	A	B	B	B	A	B	A	A	B	A	A	A	A	B	B	A	B	A	B	B	A	A	A	B	B	A	B	B	B	B	A	B	B	A	B	A
*synopGBS414	125.88	1B	TGCAGCCAAGGGTCCGTAGACAGAAGTGGGTGCTAATTAGAGTCTCTGGAGCAATGCTACCAA	T/C	0	5201	-1	30	3	68	84	2	0.802139	A	B	B	B	A	B	A	A	B	A	A	A	A	B	B	A	B	A	B	B	A	A	A	B	B	A	B	B	B	B	A	B	B	A	B	A
*synopGBS120	126.82	1B	TGCAGACCAAAAGCTCCAATCAACCCGAGACCATCCATGTTACCTCAAGGCTATTGGTGTAGC	A/G	0	1148	-1	10	3	89	77	6	0.855615	A	B	B	B	A	B	A	A	B	A	A	A	A	B	B	A	B	A	B	B	A	A	A	B	B	A	B	B	B	B	A	B	A	A	B	A
*synopGBS1223	126.82	1B	TGCAGTCTCGCATCTCCGCCTGATGGACGCCCGACGATAGCGAGAGAGCACGAGCTCGTCCGC	A/G	0	14484	-1	49	2	74	82	6	0.802139	A	B	B	-	A	B	A	A	B	A	A	A	A	B	B	A	B	A	B	B	A	A	A	B	B	A	B	B	B	B	A	B	A	A	B	A
*synopGBS1011	130.33	1B	TGCAGGTTGAGATCAGGGCCAACGACCAGGGCAACCACACCACACTACATAGCCTGAACCATC	C/T	0	12943	-1	42	3	76	84	5	0.828877	A	B	B	-	A	B	A	A	B	A	A	A	A	B	A	A	B	A	A	B	A	A	A	B	B	A	B	B	B	B	A	B	A	A	B	B
*synopGBS1012	130.33	1B	TGCAGGTTGAGATCAGGGCCAACGACCAGGGCAACCACACCACACTACATAGCCTGAACCATC	A/G	0	12944	-1	43	3	76	84	5	0.828877	A	B	B	-	A	B	A	A	B	A	A	A	A	B	A	A	B	A	A	B	A	A	A	B	B	A	B	B	B	B	A	B	A	A	B	B
*synopGBS153	133.04	1B	TGCAGACGCGCCCTTGTCCCCAACCTTGGAGAAACCCCCATCCGCATTTATCTTAGTGTCATG	A/G	0	1418	-1	54	3	82	75	4	0.818182	A	B	B	A	A	B	A	A	B	A	A	A	-	B	A	A	B	A	A	B	A	A	A	-	B	A	B	-	B	B	A	B	A	A	B	B
*synopGBS1346	145.73	1B	TGCAGTTAAATTTGTGGCGAAGGGGTTTCCAACTTGGGGGCAGCGTGCGTGTGAGGGGAGGTG	A/G	0	15455	-1	7	3	74	91	3	0.86631	A	B	B	A	A	-	A	A	B	B	A	A	B	-	A	A	B	A	A	B	A	A	B	A	B	A	B	A	B	B	A	B	A	A	B	B
*synopGBS1168	146.52	1B	TGCAGTCCAAAGGCGCCGTCCTTCCGTCCCCGCTCACGCGCCTCTGCATTGGAGCTCGCCGCG	G/C	0	14039	-1	53	3	82	93	5	0.909091	A	B	B	A	A	A	A	A	B	B	A	A	B	A	A	A	B	A	A	B	A	A	B	A	B	A	B	A	B	B	A	B	A	A	B	B
*synopGBS1169	146.52	1B	TGCAGTCCAAAGGCGTCGTCCTTCCGTCCCCGCTCACGCGCCTCTGCATTGGACCTCGCCGCG	C/G	0	14040	-1	53	1	93	79	4	0.898396	A	B	B	A	A	A	A	A	B	B	A	A	B	A	A	A	B	A	A	B	A	A	B	A	B	A	B	A	B	B	A	B	A	A	B	B
*synopGBS225	147.25	1B	TGCAGATCAGGCACGCGCGCAGCTTTGTAGGGCGGCCCAGCAGCCGAAGTCAAAATCCTGTCG	C/T	0	2532	-1	43	3	80	94	5	0.903743	A	B	B	A	A	A	A	A	B	B	A	A	A	A	A	A	B	A	A	B	A	A	B	A	B	A	B	A	B	B	A	B	A	A	B	B
*synopGBS752	147.25	1B	TGCAGGATTAGGGACCAGCTCGGGCATAGCTCCACGTCTCCCTCACTAGGAACGCGGTCCAGC	A/G	0	10386	-1	44	3	86	95	7	0.930481	A	B	B	A	A	A	A	A	B	B	A	A	A	A	A	A	B	A	A	B	A	A	B	A	B	A	B	A	B	B	A	B	A	A	B	B
*synopGBS270	148.04	1B	TGCAGATGAACTGTTACTGCATAGGCTTTCCAATTTGTTCAGCCTTTTCAAAACGAGAACTTC	C/G	0	2840	-1	29	3	87	72	4	0.828877	A	B	B	-	A	A	A	A	B	B	A	A	A	A	A	A	B	A	A	-	A	A	B	A	B	A	-	A	B	-	A	B	A	A	B	B
*synopGBS415	148.04	1B	TGCAGCCACAAATCGAGCAATCGAATCACACCATGAGCAACAGAAATGGAAGCTCGCGGCGAA	G/T	0	5229	-1	60	3	89	85	14	0.855615	A	B	B	-	A	A	A	A	B	-	A	-	A	A	A	A	-	A	A	-	A	A	B	A	B	A	-	A	B	-	A	B	A	A	-	B
*synopGBS1104	0	1D	TGCAGTAGCAAGCAACACGCACACACAGCGCCTCCAGTTGTCTCGGAGGAAAGGAAGCGGGCG	A/G	0	13527	-1	20	3	91	85	7	0.903743	A	B	A	B	B	-	A	A	A	B	B	B	-	A	B	A	A	A	A	-	A	B	B	A	A	B	B	A	A	B	B	A	A	B	B	B
*synopGBS77	0	1D	TGCAGAATGCCGTTGTATTCCTTGCAAAACTCGCTCAGTTTAGGGTGTATTATCGGGCAGACG	C/T	0	831	-1	19	3	85	85	7	0.871658	A	B	A	B	B	A	A	-	A	B	B	B	B	A	B	A	A	A	A	A	A	B	B	A	A	B	B	A	A	B	B	A	A	B	B	B
*synopGBS78	0	1D	TGCAGAATGCCGTTGTATTCCTTGCAAAACTCGCTCAGTTTAGGGTGTATTATCGGGCAGACG	T/C	0	832	-1	40	3	85	85	7	0.871658	A	B	A	B	B	A	A	-	A	B	B	B	B	A	B	A	A	A	A	A	A	B	B	A	A	B	B	A	A	B	B	A	A	B	B	B
*synopGBS79	0	1D	TGCAGAATGCCGTTGTATTCCTTGCAAAACTCGCTCAGTTTAGGGTGTATTATCGGGCAGACG	A/G	0	833	-1	41	3	85	85	7	0.871658	A	B	A	B	B	A	A	-	A	B	B	B	B	A	B	A	A	A	A	A	A	B	B	A	A	B	B	A	A	B	B	A	A	B	B	B
*synopGBS491	5.66	1D	TGCAGCCTGTATAGTACAGTATGTTTGCGCATCCAACTGTTGGGGGCGATTAGGTCTGAGACA	G/T	0	6559	-1	59	3	81	79	7	0.818182	A	B	A	B	B	A	A	-	A	B	B	B	B	A	B	A	A	A	A	A	A	B	B	A	A	B	B	A	A	B	B	B	A	B	B	B
*synopGBS762	18.74	1D	TGCAGGCAATGAAATCAACCAAGAAACGGAACTGCCCCCGTGTCATCCGTGTGGGTGACAGGG	A/G	0	10483	-1	44	3	73	93	8	0.84492	A	B	B	B	B	A	A	-	A	B	B	B	B	A	B	A	A	A	A	A	B	B	-	A	A	B	B	A	A	B	B	B	A	B	B	B
*synopGBS319	28.81	1D	TGCAGATTGACCCATTCCCCTGCGCATATCTAGGCATGCCAGGTCGTCTCGCCAGAGGTGACT	A/G	0	3269	-1	5	3	90	68	6	0.812834	A	B	B	B	A	A	A	B	A	B	B	B	B	A	B	A	A	A	A	A	B	B	A	-	A	B	B	A	A	B	B	B	A	B	B	B
*synopGBS1342	40.18	1D	TGCAGTGTTACCAGCTGATAAGCAAAGAAGATCACGTAACTCCTTGCCTTTCGCCAAAACGGC	C/T	0	15409	-1	59	2	88	81	5	0.877005	A	B	-	B	A	A	A	B	A	B	B	B	B	A	B	A	A	A	A	A	B	B	A	B	A	B	B	A	A	B	A	B	A	B	-	B
*synopGBS724	72.74	1D	TGCAGGAGGATGTTGAGTAACTTGATTGTATTAGGAAACATAGGGTGGGTTCGTCGCTGCACT	C/T	0	10150	-1	20	3	78	83	5	0.834225	A	B	-	B	A	A	A	B	A	B	B	B	B	A	B	A	A	A	A	A	-	B	-	B	B	A	B	A	A	B	A	B	A	B	-	B
*synopGBS725	72.74	1D	TGCAGGAGGATGTTGAGTAACTTGATTGTATTAGGAAACATAGGGTGGGTTCGTCGCTGCACT	G/A	0	10151	-1	44	3	78	83	5	0.834225	A	B	-	B	A	A	A	B	A	B	B	B	B	A	B	A	A	A	A	A	-	B	-	B	B	A	B	A	A	B	A	B	A	B	-	B
*synopGBS200	80.52	1D	TGCAGAGGAGGTCAGAGTTCCTCATCTCTGAGGTGGGGCTGGAACCGACATACATTGCTCATC	C/G	0	2053	-1	45	2	77	76	3	0.802139	A	B	A	B	A	A	A	B	A	B	B	B	B	A	A	A	A	A	A	A	A	B	-	B	B	A	B	A	A	B	A	B	A	B	A	B
*synopGBS1393	81.36	1D	TGCAGTTCCAGTGGTGCTCCATTGCAACCCTGACAAAGCTTTGACGACCCTCCAGTGTGCTTC	C/T	0	15762	-1	29	3	91	84	5	0.909091	A	B	A	B	A	A	A	B	A	B	B	B	B	A	A	A	A	A	A	A	A	B	B	B	B	A	B	A	A	B	A	B	A	B	A	B
*synopGBS342	82.99	1D	TGCAGCAAGCTAAACCAAGTCTTGAAACTGGAGCAGCGAACAATTCTAAAGTCGCTTGAGGCT	A/G	0	3711	-1	12	1	79	81	6	0.823529	A	B	A	B	A	A	A	B	A	B	B	B	B	A	A	A	A	A	A	A	A	B	B	B	B	A	B	A	A	B	A	B	A	B	A	-
*synopGBS1084	88.88	1D	TGCAGTACTATGAAACGCCCCGTCCACATTGATTTTCAACTGATCCCCGTCAGGCCTAGTCCG	A/T	0	13417	-1	57	3	83	92	6	0.903743	A	B	A	B	A	A	A	B	A	B	B	B	B	A	A	A	A	A	A	A	A	B	B	B	B	A	B	A	A	B	B	B	A	B	A	A
*synopGBS468	90.39	1D	TGCAGCCTCAGCAGTGAGTTCGGGGGCGCTGCCTGTGCCCGCCTGCGTGCCGTCCACGGCGAC	C/T	0	6337	-1	41	3	93	84	10	0.893048	A	B	A	B	A	A	A	B	A	B	B	B	B	A	A	A	A	A	A	A	A	B	B	B	B	A	B	A	A	B	B	B	A	B	A	A
*synopGBS1314	98.45	1D	TGCAGTGGCCAAGTTACCTCAAGTCCTCAAATCGGGCTAAACACTGGCCGCCGAGCAGGATTG	C/T	0	15130	-1	63	3	93	75	7	0.860963	A	B	B	B	A	A	A	A	A	B	B	B	B	A	A	A	A	A	A	A	A	B	B	B	B	A	B	A	A	B	B	B	A	B	A	A
*synopGBS1331	99.29	1D	TGCAGTGTCCCATCCTGATGTGGAGCCGTGGAGGCATCCTCGATTGGGGTTGTTGAAGGTGTG	C/T	0	15325	-1	26	3	69	94	7	0.834225	A	B	B	B	A	A	A	A	A	B	B	B	B	A	A	A	A	A	A	A	A	B	B	B	B	A	B	A	A	B	B	B	A	B	A	A
*synopGBS796	117.49	1D	TGCAGGCCAAAGTCTTGATAACCAGCGGATCCCTTATGGATTCGTACTTGGGGATCCTTCCAG	T/G	0	10709	-1	54	3	90	71	6	0.828877	A	B	B	B	A	A	B	A	A	B	B	B	B	A	B	A	A	A	A	A	A	B	B	A	B	A	B	A	B	B	B	B	A	B	A	A
*synopGBS797	117.49	1D	TGCAGGCCAAAGTCTTGATAACCAGCGGATCCCTTATGGATTCGTACTTGGTGAGCCTTCCAG	G/T	0	10710	-1	54	1	71	90	6	0.828877	A	B	B	B	A	A	B	A	A	B	B	B	B	A	B	A	A	A	A	A	A	B	B	A	B	A	B	A	B	B	B	B	A	B	A	A
*synopGBS1036	129.31	1D	TGCAGGTTTGCTGCACCGCCTCAACGAATACGACCAATAAGCGACAAAATTATGGAATCCGAC	A/C	0	13068	-1	51	3	88	80	3	0.882353	A	B	A	B	A	B	B	A	A	B	B	B	B	A	A	A	A	A	A	A	A	B	B	A	B	A	B	A	B	B	B	A	A	B	A	A
*synopGBS80	129.31	1D	TGCAGAATGCGTCTTCCTGAATGGCATGATGCATTTTATGCATTCCTTGCTCCATAAACTTTC	A/G	0	837	-1	25	3	73	92	6	0.850267	A	B	A	B	A	B	B	A	A	B	B	B	B	A	A	A	A	A	A	A	A	B	B	A	B	A	B	A	B	B	B	A	A	B	A	A
*synopGBS81	129.31	1D	TGCAGAATGCGTCTTCCTGAATGGCATGATGCATTTTATGCATTCCTTGCTCCATAAACTTTC	C/G	0	838	-1	45	3	73	92	6	0.850267	A	B	A	B	A	B	B	A	A	B	B	B	B	A	A	A	A	A	A	A	A	B	B	A	B	A	B	A	B	B	B	A	A	B	A	A
*synopGBS772	135.62	1D	TGCAGGCACGATACACTTGTGGAACTTCCAACAATTCCTATGGCAGCATGAGGAGCACCAAGG	C/T	0	10536	-1	13	3	79	75	4	0.802139	A	B	A	B	A	B	B	A	A	B	B	B	B	A	A	A	A	A	A	A	A	B	B	A	B	A	B	A	B	B	B	A	A	B	A	A
*synopGBS917	138.87	1D	TGCAGGTAACGCGGCTCAAGTGTGGAGGCTTCATATTTGGGCACCGTGTGTGCCACTGCATGG	A/G	0	12114	-1	7	1	92	86	4	0.930481	A	B	A	B	A	B	B	A	A	B	B	B	B	A	A	A	A	A	A	A	A	B	B	A	B	A	B	A	B	B	B	A	A	B	A	A
*synopGBS193	143.64	1D	TGCAGAGCATGCTGACTCTGGCTGGGACCAAGATGTGAGCTTTGCGACGGCACCAATGGAGCC	A/G	0	1895	-1	46	3	86	75	4	0.839572	A	B	A	B	A	B	B	B	A	B	A	B	B	A	A	A	A	A	A	A	A	B	B	A	B	A	B	B	B	B	B	A	A	B	A	A
*synopGBS194	143.64	1D	TGCAGAGCATGCTGACTCTGGCTGGGACCAAGATGTGAGCTTTGCGACGGCACCAATGGAGCC	C/A	0	1896	-1	47	3	86	75	4	0.839572	A	B	A	B	A	B	B	B	A	B	A	B	B	A	A	A	A	A	A	A	A	B	B	A	B	A	B	B	B	B	B	A	A	B	A	A
*synopGBS195	143.64	1D	TGCAGAGCATGCTGACTCTGGCTGGGACCAAGATGTGAGCTTTGCGACGGCACCAATGGAGCC	C/T	0	1897	-1	62	3	86	75	4	0.839572	A	B	A	B	A	B	B	B	A	B	A	B	B	A	A	A	A	A	A	A	A	B	B	A	B	A	B	B	B	B	B	A	A	B	A	A
*synopGBS648	149.2	1D	TGCAGCTTGGTGCTCGCCATCTCGCGCAGCCTGGCGATGTCGGCCGCGTCGATGTAGTAGAGG	C/T	0	9335	-1	46	3	80	75	4	0.807487	A	B	A	B	A	B	B	B	A	B	A	B	B	-	A	A	A	A	A	A	A	B	B	A	B	A	B	B	B	B	B	A	-	B	A	B
*synopGBS132	154.66	1D	TGCAGACCGATCTAGCGGAGCACCCATCGGTCGGGATCGCGAGCCATCCATCAAACCTGCTCG	G/T	0	1259	-1	42	3	75	82	6	0.807487	A	B	A	B	A	B	B	B	A	B	A	B	B	-	A	A	A	-	A	A	A	B	B	A	B	A	B	B	B	B	B	A	B	B	A	B
*synopGBS377	154.66	1D	TGCAGCATCAACATCTACTGGTTGAATCAAATTTCTATTTGCGAGCTCATTGAAGTAACTCTC	C/G	0	4829	-1	14	3	87	69	6	0.802139	A	B	A	B	A	B	B	B	A	B	A	B	-	-	-	A	-	-	A	A	A	B	B	A	B	A	B	B	B	B	B	A	B	B	-	B
*synopGBS378	154.66	1D	TGCAGCATCAACATCTACTGGTTGAATCAAATTTCTATTTGCGAGCTCATTGAAGTAACTCTC	A/G	0	4830	-1	30	3	87	69	6	0.802139	A	B	A	B	A	B	B	B	A	B	A	B	-	-	-	A	-	-	A	A	A	B	B	A	B	A	B	B	B	B	B	A	B	B	-	B
*synopGBS379	154.66	1D	TGCAGCATCAACATCTACTGGTTGAATCAAATTTCTATTTGCGAGCTCATTGAAGTAACTCTC	G/A	0	4831	-1	42	3	87	69	6	0.802139	A	B	A	B	A	B	B	B	A	B	A	B	-	-	-	A	-	-	A	A	A	B	B	A	B	A	B	B	B	B	B	A	B	B	-	B
*synopGBS827	154.66	1D	TGCAGGCGCCGTTGTTTGTGGAGACTAACATGGCGTTGGGGGGGGCGGCATCCCGCAAGCAAC	G/A	0	11107	-1	32	3	73	84	5	0.812834	A	B	A	B	A	B	-	B	A	B	A	B	-	B	-	A	-	B	A	-	A	B	B	A	B	A	B	B	B	B	B	A	B	-	-	B
*synopGBS1152	0	2A	TGCAGTCACACATCCGCGTACAGGCACACAAATTTAGTTACACCTCTGTGTACGGGCACACAG	A/G	0	13892	-1	7	3	77	90	5	0.86631	A	B	A	A	-	B	-	B	-	A	A	A	-	B	B	A	-	B	B	B	A	A	A	-	A	A	A	A	B	B	B	A	B	A	A	B
*synopGBS1153	0	2A	TGCAGTCACACATCCGCGTACAGGCACACAAATTTAGTTACACCTCTGTGTACGGGCACACAG	A/G	0	13893	-1	27	3	77	90	5	0.86631	A	B	A	A	-	B	-	B	-	A	A	A	-	B	B	A	-	B	B	B	A	A	A	-	A	A	A	A	B	B	B	A	B	A	A	B
*synopGBS1154	0	2A	TGCAGTCACACATCCGCGTACAGGCACACAAATTTAGTTACACCTCTGTGTACGGGCACACAG	G/A	0	13894	-1	62	3	77	90	5	0.86631	A	B	A	A	-	B	-	B	-	A	A	A	-	B	B	A	-	B	B	B	A	A	A	-	A	A	A	A	B	B	B	A	B	A	A	B
*synopGBS726	0	2A	TGCAGGAGGGACGACGGCCTTCCCCCGTTCTTCGGCTTGGCGCTGAAGGTCTTCCTCGCATGT	C/T	0	10184	-1	25	3	86	71	3	0.823529	A	B	A	A	B	B	B	B	B	A	A	A	B	B	B	A	B	B	B	B	A	A	A	B	A	A	A	A	B	B	B	A	B	A	A	B
*synopGBS727	0	2A	TGCAGGAGGGACGACGGCCTTCCCCCGTTCTTCGGCTTGGCGCTGAAGGTCTTCCTCGCATGT	A/G	0	10185	-1	59	3	93	74	13	0.823529	A	B	A	A	B	B	B	B	B	A	A	A	B	B	B	A	B	B	B	B	A	A	A	B	A	A	A	A	B	B	B	A	B	A	A	B
*synopGBS1087	2.94	2A	TGCAGTACTGTGCGAGACAGCGTGGCCGTGTGATGCGGCAAGCGCATGAGAGGCTGGAGCAAG	A/G	0	13445	-1	6	3	80	98	5	0.925134	A	B	A	A	B	B	B	B	B	B	A	A	B	B	B	A	B	B	B	B	A	A	A	B	A	A	A	A	B	B	B	A	B	A	A	B
*synopGBS136	8.09	2A	TGCAGACCTATTTGCCGCACGGTAGCAGATGCAGTCCATGGGTTGGACGCCATTGTTGGCTAC	A/G	0	1297	-1	26	2	105	74	6	0.925134	A	B	A	A	B	B	B	B	B	B	A	A	B	B	B	A	B	B	B	B	A	B	A	B	A	A	A	A	B	B	B	A	B	A	A	B
*synopGBS137	8.86	2A	TGCAGACCTCACCATATAGCTGGTGTTCAGGTGCCTAGAGGGATTGGGAAACTGACGGCGTTG	A/G	0	1298	-1	13	3	76	104	10	0.909091	A	B	A	A	B	B	B	B	B	B	A	A	B	B	B	A	B	B	B	B	A	B	A	B	A	A	A	A	B	B	B	A	B	A	A	B
*synopGBS346	8.86	2A	TGCAGCACAAGGCGTACCTATACTTCGGCAAAGCCAGCACCAACAAGCCGCTGGAGGCGCTCC	C/T	0	3898	-1	25	3	71	88	3	0.834225	A	B	A	A	B	B	B	B	B	B	A	A	B	B	B	A	B	B	B	B	A	B	A	B	A	A	A	A	B	B	B	A	B	A	A	B
*synopGBS443	8.86	2A	TGCAGCCCCTGCTGAACGGGAACGGCCGCCCCTTCCACTCTGAACCCAAACCAAAATTCAGAC	C/T	0	5805	-1	44	3	90	66	3	0.818182	A	B	A	A	B	B	B	B	B	B	A	A	B	B	B	A	B	B	B	B	A	B	A	B	A	A	A	A	B	B	B	A	B	A	A	B
*synopGBS444	8.86	2A	TGCAGCCCCTGCTGAACGGGAACGGCCGCCCCTTCCACTCTGAACCCAAACCAAAATTCAGAC	C/A	0	5806	-1	63	3	90	66	3	0.818182	A	B	A	A	B	B	B	B	B	B	A	A	B	B	B	A	B	B	B	B	A	B	A	B	A	A	A	A	B	B	B	A	B	A	A	B
*synopGBS634	8.86	2A	TGCAGCTTCCTCTGAAGTGTTCCCGATGTTGTCGTTCGTCGTTTGTGTGCAGCGGCCAAAGCC	A/G	0	9150	-1	15	3	84	79	4	0.850267	A	B	A	A	B	B	B	B	B	B	A	A	B	B	B	A	B	B	B	B	A	B	A	B	A	A	A	A	B	B	B	A	B	A	A	B
*synopGBS635	8.86	2A	TGCAGCTTCCTCTGAAGTGTTCCCGATGTTGTCGTTCGTCGTTTGTGTGCAGCGGCCAAAGCC	A/C	0	9151	-1	25	3	84	79	4	0.850267	A	B	A	A	B	B	B	B	B	B	A	A	B	B	B	A	B	B	B	B	A	B	A	B	A	A	A	A	B	B	B	A	B	A	A	B
*synopGBS659	8.86	2A	TGCAGCTTTTGCCATTGCACTGTGCGCACGCTTAGCTTCGTATTAGGCTCTAAGAAACAATTC	C/T	0	9432	-1	38	3	102	65	8	0.850267	A	B	A	A	B	B	B	B	B	B	A	A	B	B	B	A	B	B	B	B	A	B	A	B	A	A	A	A	B	B	B	A	B	A	A	B
*synopGBS1435	9.77	2A	TGCAGTTGCCGAGGTACAGGGACTGGAAGGGCGCCTGACGATTCTGGACGATGACACGTACGC	A/C	0	16061	-1	40	3	96	75	8	0.871658	A	B	A	A	B	B	B	B	B	B	A	A	B	B	B	A	B	B	B	B	A	B	A	B	A	A	A	A	B	B	B	A	B	A	A	B
*synopGBS1445	9.77	2A	TGCAGTTGGGCAACATCATTATCGCCAACATCACATTGGAGAAGGCGCAGATGGGGGTCTACA	A/G	0	16162	-1	50	3	102	72	8	0.887701	A	B	A	A	B	B	B	B	B	B	A	A	B	B	B	A	B	B	B	B	A	B	A	B	A	A	A	A	B	B	B	A	B	A	A	B
*synopGBS347	9.77	2A	TGCAGCACAAGGCGTACCTATACTTCGGCAAAGCCAGCACCAACAAGCCGCTGGAGGCGCTCC	C/A	0	3899	-1	39	3	71	88	3	0.834225	A	B	A	A	B	B	B	B	B	B	A	A	B	B	B	A	B	B	B	B	A	B	A	B	A	A	A	A	B	B	B	A	B	A	A	B
*synopGBS849	9.77	2A	TGCAGGCTGGGTTGCCTCTACTGCTGCTGCCAGATTTTGGCACCAATAATAAGGCAAGGCGAT	C/T	0	11388	-1	42	2	66	88	4	0.802139	A	B	A	A	B	B	B	B	B	B	A	A	B	B	B	A	B	B	B	B	A	B	A	B	A	A	A	A	B	B	B	-	B	A	A	B
*synopGBS1220	16.45	2A	TGCAGTCTCCCGTCAGCATTTTTCTTTTGGTGATGAACTCTCATGTCAGCTTTAGGCAGGGAG	C/G	0	14471	-1	37	1	75	92	6	0.860963	A	B	A	-	B	B	B	B	B	B	A	A	B	B	B	A	B	B	B	B	A	B	A	B	B	A	A	A	B	B	B	-	B	A	A	B
*synopGBS398	26	2A	TGCAGCATTGCGGACCACTGCAACGGCCTCCTGTTGCTCGATGTTCACGAGGACCATTACTAC	C/T	0	5084	-1	10	3	81	95	7	0.903743	A	B	A	B	B	A	B	B	B	A	A	A	B	B	B	A	B	B	B	B	A	B	A	B	B	A	A	A	B	B	B	B	B	A	A	B
*synopGBS399	26	2A	TGCAGCATTGCGGACCACTGCAACGGCCTCCTGTTGCTCGATGTTCACGAGGACCATTACTAC	G/C	0	5085	-1	32	3	81	101	13	0.903743	A	B	A	B	B	A	B	B	B	A	A	A	B	B	B	A	B	B	B	B	A	B	A	B	B	A	A	A	B	B	B	B	B	A	A	B
*synopGBS855	26.79	2A	TGCAGGCTTCAGGAGCGGCACCACGTTCACCTCGGCCCAGGGCTCTAGCTGGGCGAATACCTC	A/G	0	11418	-1	28	3	84	76	3	0.839572	A	B	A	B	B	A	B	B	B	A	A	A	B	B	B	A	B	B	B	B	A	B	A	B	B	A	A	A	B	B	B	B	B	A	A	B
*synopGBS1016	33.16	2A	TGCAGGTTGCTCATGGCGGCACCGAAGAGACTCTGTTGATCCCACGACTGCTGAGCGGGGCCG	A/G	0	12974	-1	20	3	79	84	8	0.828877	A	B	A	B	B	A	B	B	-	A	A	A	B	B	B	A	B	A	B	B	A	B	A	B	B	A	A	A	B	A	A	B	B	A	A	B
*synopGBS1017	33.16	2A	TGCAGGTTGCTCATGGCGGCACCGAAGAGACTCTGTTGATCCCACGACTGCTGAGCGGGGCCG	A/G	0	12975	-1	25	3	79	87	11	0.828877	A	B	A	B	B	A	B	B	-	A	A	A	B	B	B	A	B	A	B	B	A	B	A	B	B	A	A	A	B	A	A	B	B	A	A	B
*synopGBS374	42.28	2A	TGCAGCAGGGTTAAGGAGGGCCTGGGAACGCCCAAGGGAGCTATGGTCACCGTGATCTCTGTG	C/G	0	4686	-1	50	3	85	71	3	0.818182	A	B	A	B	B	A	B	B	A	A	A	A	B	A	B	A	A	A	B	-	A	B	A	B	B	A	A	A	B	A	A	B	B	A	A	B
*synopGBS262	46.79	2A	TGCAGATCTCGCCAGCCAAGGGAGGAGAGGGTCCCACCGCTGCTCTAATGGCGAGGAGGAGAG	C/T	0	2784	-1	37	3	82	80	2	0.855615	A	B	A	B	B	A	B	-	A	A	A	A	B	A	B	A	A	A	B	A	A	B	A	B	B	A	A	A	B	A	A	B	B	A	A	B
*synopGBS10	63.3	2A	TGCAGAAAACAAACACATGTCAGAATAAGCACTAGGATTCCACAATTGTAATGAAGTTTCAAC	A/G	0	43	-1	23	3	83	72	4	0.807487	A	B	A	B	B	A	B	-	A	A	A	A	B	A	B	A	A	A	A	A	A	A	A	B	A	A	A	A	B	-	A	B	B	A	A	B
*synopGBS192	63.3	2A	TGCAGAGCATCATCCATCCCATCCCCAGGTCATAAACCCAAGTCGGACTCGCCTTCCTCCTCC	C/G	0	1886	-1	62	3	72	85	3	0.823529	A	B	A	B	B	A	B	A	A	A	A	A	B	A	B	A	A	A	A	A	A	A	A	B	A	A	A	A	B	B	A	B	B	A	A	B
*synopGBS700	64.98	2A	TGCAGGACGAGGCATCTCATCCTCCTCTCCCTCGCGGCCTCACCCATCATTTCCTTGGCCCCT	A/G	0	9874	-1	41	3	91	79	7	0.871658	A	B	A	B	B	A	B	A	A	A	A	A	B	A	B	A	A	A	A	A	A	A	A	B	A	A	A	A	B	B	A	B	B	B	A	B
*synopGBS747	64.98	2A	TGCAGGATGATGGGTTCCACCGAACCAATGGTTTCTTTTCGCTTCCCCAGGACAGGAGAGGAG	C/G	0	10344	-1	25	3	77	83	4	0.834225	A	B	A	B	B	A	B	A	A	A	A	A	B	A	B	A	A	A	A	A	A	A	A	B	A	A	A	A	B	B	A	B	B	-	A	B
*synopGBS768	64.98	2A	TGCAGGCACATCACAATTTGATTGGACGTCGCAAGGCCCGTTGTAGGAGCATCGAGAGAAAGT	A/G	0	10514	-1	9	1	71	89	3	0.839572	A	B	A	B	B	A	B	A	A	A	A	A	B	A	B	A	A	A	A	A	A	A	A	B	A	A	A	A	B	B	A	B	B	-	A	B
*synopGBS873	64.98	2A	TGCAGGGACAGTCCTAGCATGCGGTATAGTTGGGCACCGTAGGCCTGCCCGCATAGCGTCTCC	A/G	0	11517	-1	35	2	77	100	6	0.914439	A	B	A	B	B	A	B	A	A	A	A	A	B	A	B	A	A	A	A	A	A	A	A	B	A	A	A	A	B	B	A	B	B	A	A	B
*synopGBS1082	66.57	2A	TGCAGTACGTGGATCGAGCCATCTTCTCCGTGCACGAGCGTCGTCATCCGCCGTTGATTCGCT	C/T	0	13406	-1	18	3	83	89	4	0.898396	A	B	A	B	B	A	B	A	A	A	A	A	B	A	B	A	A	A	A	A	A	A	A	B	A	A	A	A	B	B	A	B	B	B	A	B
*synopGBS979	66.57	2A	TGCAGGTCTGGGCAAGAACGGCGCAATCCCTGGGAAGCCCGTTCAATCCCTGGGAAGCCCATT	G/A	0	12520	-1	56	3	84	81	7	0.84492	A	B	A	B	B	A	B	A	A	A	A	A	B	A	B	A	A	A	A	A	A	A	A	B	A	A	A	A	B	B	A	B	B	B	A	B
*synopGBS1148	67.4	2A	TGCAGTCAAGTTCTCTCCACTAAAGAAAGGAAAGCGAGCGAGCAAAAGCAGGCGTGGCTCCTT	A/T	0	13878	-1	18	3	78	79	3	0.823529	A	B	A	B	B	A	B	A	A	A	A	A	B	A	B	A	A	A	A	A	A	A	A	B	A	A	A	A	B	B	A	B	B	A	A	B
*synopGBS1206	67.4	2A	TGCAGTCGTGCGGATATTCGATCTGGCCGCAGGCGCAACTGGAAATCACGTTGCATCCCCGTG	A/G	0	14395	-1	15	3	78	89	2	0.882353	A	B	A	B	B	A	B	A	A	A	A	A	B	A	B	A	A	A	A	A	A	A	A	B	A	A	A	A	B	B	A	B	B	A	A	B
*synopGBS1207	67.4	2A	TGCAGTCGTGCGGATATTCGATCTGGCCGCAGGCGCAACTGGAAATCACGTTGCATCCCCGTG	T/C	0	14396	-1	16	3	78	89	2	0.882353	A	B	A	B	B	A	B	A	A	A	A	A	B	A	B	A	A	A	A	A	A	A	A	B	A	A	A	A	B	B	A	B	B	A	A	B
*synopGBS1289	68.14	2A	TGCAGTGCCTTGGGCCTCTCCTCCTCGAAGCTGGGCTGCGCTGCCACGGCGGACATGCCGTCC	A/G	0	14938	-1	27	3	88	90	4	0.930481	A	B	A	B	B	A	B	A	A	A	A	A	B	A	B	A	A	A	A	A	A	A	A	B	A	A	A	A	B	B	A	B	B	A	A	B
*synopGBS1290	68.14	2A	TGCAGTGCCTTGGGCCTCTCCTCCTCGAAGCTGGGCTGCGCTGCCACGGCGGACATGCCGTCC	T/C	0	14939	-1	41	3	88	90	4	0.930481	A	B	A	B	B	A	B	A	A	A	A	A	B	A	B	A	A	A	A	A	A	A	A	B	A	A	A	A	B	B	A	B	B	A	A	B
*synopGBS1297	68.14	2A	TGCAGTGCGGCGCCACCGCAGTACCGCCCTGACCTTTGCATCGCCAGCGTCCCTGCCTCGCTG	C/T	0	14970	-1	15	3	97	59	2	0.823529	A	B	A	B	B	A	B	A	A	A	A	A	B	A	B	A	A	A	A	A	A	A	A	B	A	A	A	A	B	B	A	B	B	A	A	B
*synopGBS1298	68.14	2A	TGCAGTGCGGCGCCACCGCAGTACCGCCCTGACCTTTGCATCGCCAGCGTCCCTGCCTCGCTG	C/T	0	14971	-1	24	3	97	59	2	0.823529	A	B	A	B	B	A	B	A	A	A	A	A	B	A	B	A	A	A	A	A	A	A	A	B	A	A	A	A	B	B	A	B	B	A	A	B
*synopGBS1299	68.14	2A	TGCAGTGCGGCGCCACCGCAGTACCGCCCTGACCTTTGCATCGCCAGCGTCCCTGCCTCGCTG	C/T	0	14972	-1	43	3	97	59	2	0.823529	A	B	A	B	B	A	B	A	A	A	A	A	B	A	B	A	A	A	A	A	A	A	A	B	A	A	A	A	B	B	A	B	B	A	A	B
*synopGBS1398	68.99	2A	TGCAGTTCCTCCCCCCGCCCTTCTCCAACCTCACGCAGCTCGTCGACAGCTTCAAGGCCAAGA	C/T	0	15803	-1	24	1	94	81	7	0.898396	A	B	A	B	B	A	B	A	A	A	A	A	B	A	B	A	A	A	A	A	A	A	A	B	A	A	A	A	B	B	A	B	B	A	A	B
*synopGBS1432	68.99	2A	TGCAGTTGCATTATCACCTGTGCAGTGCTCTCCTCTGAAGCTGGCGCTTTGACAGGGATAGTG	C/G	0	16042	-1	22	3	87	91	6	0.919786	A	B	A	B	B	A	B	A	A	A	A	A	B	A	B	A	A	A	A	-	A	A	A	B	A	A	A	A	B	B	A	B	B	-	A	B
*synopGBS1475	70.7	2A	TGCAGTTTGAACTACAACACGTCCAAACCAACGAATACACAAATGCCATTGGTTGGACGATGT	C/G	0	16448	-1	23	3	82	77	3	0.834225	A	B	A	B	B	A	B	A	A	A	A	A	B	A	B	A	A	A	A	-	A	A	A	B	A	A	A	A	B	B	A	B	B	-	A	B
*synopGBS916	71.57	2A	TGCAGGTAACCAACGGCCCAGTGTAGCGCGGGCGCCCCCCTGGGGCGATCGGTCAGGTGGTAA	C/G	0	12111	-1	34	3	87	95	12	0.909091	A	B	A	B	B	A	B	A	A	-	A	A	B	A	B	A	A	A	A	B	A	A	A	B	A	A	-	-	B	B	A	B	B	B	A	B
*synopGBS980	72.4	2A	TGCAGGTCTGGTCAAGAACGGCGCAATCCCTGGGAAGCCCGTTCAATCCCTGGGAAACCCATT	A/G	0	12523	-1	56	1	81	84	7	0.84492	A	B	A	B	B	-	B	A	A	-	A	-	B	A	B	A	A	A	A	A	A	A	A	B	A	A	-	-	B	B	A	B	B	B	A	B
*synopGBS157	85.43	2A	TGCAGACGGCCATCAGCTTTGTGTCCTCCGCAAGGGCGTCCATGAGAGAAGATGACATGAGGA	G/A	0	1443	-1	37	2	76	104	12	0.898396	A	B	A	B	B	B	B	A	A	-	A	B	B	A	B	A	A	B	A	A	A	A	A	B	A	A	-	B	B	B	B	B	B	B	A	B
*synopGBS159	85.43	2A	TGCAGACGGTCATCAGCTTTGTGTCCTCCGCAAGGGCATCCATGAGAGAAGATGACATGAGGA	A/G	0	1460	-1	37	1	104	75	12	0.893048	A	B	A	B	B	B	B	A	A	-	A	B	B	A	B	A	A	B	A	-	A	A	A	B	A	A	-	B	B	B	B	B	B	B	A	B
*synopGBS553	86.24	2A	TGCAGCTAGGTTGGCGATGAGGCCGCTGGTGCAATTGTTGGATCCGATGGCCTGGAGAAGCTG	A/C	0	7910	-1	32	3	83	100	14	0.903743	A	B	A	B	B	-	B	A	A	-	A	B	B	A	B	-	A	B	A	-	A	A	-	B	A	A	-	B	B	B	B	B	B	B	A	B
*synopGBS1428	87.12	2A	TGCAGTTGATTACACATGTACGGAGCTTTCTTCAGGGTGCTGCAAAAGGAAAGCGATGAACGC	C/T	0	16018	-1	20	3	90	75	11	0.823529	A	B	-	B	B	A	B	A	A	-	A	B	B	A	B	B	A	B	A	B	A	A	-	B	A	A	B	B	B	B	B	B	B	B	A	B
*synopGBS605	87.12	2A	TGCAGCTGAAGCCTGAAAACGAGTTGCTAGACGCGGCACTGGGACATAGTAGGAACCAAGGGC	A/G	0	8566	-1	18	3	85	88	14	0.850267	A	B	-	B	B	A	B	A	A	-	A	B	B	A	B	B	A	B	A	-	A	A	-	B	A	A	B	B	B	B	B	B	B	B	A	B
*synopGBS266	87.98	2A	TGCAGATCTGTTCTGCCAGTTTCCCCCTTTGTGTGTTCACGATTCGGTTCCACGAGCGTCTAA	G/A	0	2810	-1	32	3	98	80	10	0.898396	A	B	B	B	B	A	B	A	A	-	A	B	B	A	B	-	A	B	A	A	A	A	-	B	A	A	B	B	B	B	B	B	B	B	A	B
*synopGBS898	92.18	2A	TGCAGGGGAATTCACAAAATAATACCTTCATGTCCAGGCGCTGCTCCATCATGAGGAGCACAG	A/C	0	11833	-1	15	3	91	84	11	0.877005	A	B	-	B	B	A	B	A	A	-	B	B	B	A	B	A	A	B	A	-	A	-	-	B	A	A	B	A	B	B	B	B	B	B	A	B
*synopGBS550	96.22	2A	TGCAGCTAGGGATGCGATGCTGACAATGATGCTTCAAATTATGTCGCAAGACGACCGACCGAT	C/G	0	7894	-1	5	3	79	101	13	0.893048	A	B	-	B	B	A	B	A	A	-	B	B	B	A	B	A	A	A	A	B	A	B	-	B	A	A	B	B	B	B	B	B	B	B	A	B
*synopGBS1073	97.97	2A	TGCAGTACCTCCGTACCATGATGTCGAGCTCATTGATCGACTCGGGTCCCACGATGTCGTCCC	C/T	0	13363	-1	10	3	83	74	5	0.812834	A	B	A	B	B	A	B	A	A	-	B	B	B	A	B	A	A	A	A	B	A	B	-	B	A	A	A	B	B	B	B	B	B	B	A	B
*synopGBS129	97.97	2A	TGCAGACCGACCCGCTTCCTCCTCAGTGTCTCGATCTCTTCGACTGGCCACTGCACCAGCCGC	C/T	0	1249	-1	7	1	74	99	15	0.84492	A	B	A	B	B	-	B	-	A	-	B	B	B	A	B	A	A	A	A	B	A	B	-	B	A	A	-	B	B	B	B	B	B	B	A	B
*synopGBS1065	99.67	2A	TGCAGTACACGGCGAGCAGCCAACAGCGTACCAGCGCGTACACGCTGAAGTTCCTGCAAGTGC	C/G	0	13300	-1	36	2	83	103	12	0.930481	A	B	A	B	B	-	B	-	A	-	B	B	B	A	B	A	A	A	A	A	A	B	-	B	A	A	B	B	B	B	B	B	B	B	A	B
*synopGBS1259	111.2	2A	TGCAGTGATCAAGAATGCTTGCGCGGTTCGATCGACGTCGTCGCTGAGCCCGTCCGTCAAGTC	A/C	0	14732	-1	58	3	89	105	17	0.946524	A	B	-	B	B	-	B	-	A	-	A	B	A	A	B	A	B	A	A	A	A	B	-	B	A	A	A	-	B	B	B	B	B	B	A	B
*synopGBS441	113.9	2A	TGCAGCCCCGAGCCCGCGCCGCCGCTGCCGCCCTCCGCCGCGCCGTTCGCCGCCGACGACCGT	G/T	0	5773	-1	48	3	81	85	14	0.812834	A	B	B	B	B	-	B	-	A	-	A	B	A	A	B	A	B	A	A	A	B	B	-	B	A	A	-	-	B	B	B	B	B	B	A	B
*synopGBS892	113.9	2A	TGCAGGGCGATCCGAACGCGTCTGGACAACAACCGCGCCCGCCCAGTTGAAGCACAACGTGCC	C/T	0	11742	-1	16	3	78	85	12	0.807487	A	B	B	B	B	B	B	B	A	-	A	B	A	A	B	-	B	A	A	A	B	B	-	B	A	A	-	-	B	B	B	B	B	B	A	B
*synopGBS674	114.85	2A	TGCAGGAACCCCGACACATCCTTCTTCTCATCCGTCTCCGTCGCCGCAGCACCAGGCGCATGC	A/C	0	9560	-1	29	3	97	75	12	0.855615	A	B	B	B	B	B	B	B	A	-	A	B	A	A	B	-	B	A	A	A	B	B	B	B	A	A	-	-	B	B	B	B	B	B	A	B
*synopGBS786	116.62	2A	TGCAGGCAGCTGAGGGCGGGGCACGGGCGAGGGCGGCAAGAAAGTTGTTCAGCTTGCGTACTG	C/T	0	10622	-1	9	3	101	73	13	0.860963	A	B	B	B	B	B	B	B	A	B	A	B	A	A	B	-	B	A	A	A	B	B	B	B	A	A	-	-	B	B	B	B	B	B	A	B
*synopGBS180	118.56	2A	TGCAGAGAGAAGCGACGGGGAAGACAAGACCAACCGACACAAGTGCCGCTCCTTCCTTCCTTT	C/G	0	1746	-1	24	3	73	88	11	0.802139	A	B	B	B	B	B	B	B	A	-	A	B	A	A	B	-	B	A	A	A	B	B	A	B	A	A	-	A	B	B	B	B	B	B	A	B
*synopGBS291	118.56	2A	TGCAGATGGAGCATCAATCTCCTCCGCTTTTCTTGAAGCAACCGCAACCTGGTGCCCCCGAAG	C/T	0	3022	-1	55	3	74	93	13	0.823529	A	B	B	B	B	B	B	B	A	-	A	B	A	A	B	-	B	A	A	A	B	B	A	B	A	A	B	A	B	B	B	B	B	B	A	B
*synopGBS292	118.56	2A	TGCAGATGGAGCATCAATCTCCTCCGCTTTTCTTGAAGCAACCGCAACCTGGTGCCCCCGAAG	A/C	0	3023	-1	61	3	74	93	13	0.823529	A	B	B	B	B	B	B	B	A	-	A	B	A	A	B	-	B	A	A	A	B	B	A	B	A	A	B	A	B	B	B	B	B	B	A	B
*synopGBS483	118.56	2A	TGCAGCCTGAATCCCAGCATTGAAAGCCCCCTCCCCTCTCCAAGCTCCATCGCAGCACTAGTG	C/G	0	6488	-1	40	1	78	89	11	0.834225	A	B	B	B	B	B	B	B	A	-	A	B	A	A	B	-	B	A	A	-	B	B	A	B	A	A	B	A	B	B	B	B	B	B	A	B
*synopGBS884	118.56	2A	TGCAGGGCAAACCCTTTTTTTCCGCCAGATCCAATGGCCCACGCGGCTCAAATCCAACGGCCC	C/T	0	11637	-1	57	3	73	90	9	0.823529	A	B	B	B	B	B	B	B	A	-	A	B	A	A	B	-	B	A	A	B	B	B	A	B	A	A	B	A	B	B	B	B	B	B	A	B
*synopGBS994	119.48	2A	TGCAGGTTCACCAATGCAGATTACAAGAAGCTACAAAGAATCAGCGAGACCCCCACCACGTAT	C/T	0	12870	-1	51	1	69	92	8	0.818182	A	B	B	B	B	B	B	B	A	A	A	B	A	A	B	-	B	A	A	A	B	B	A	B	A	A	B	A	B	B	B	B	B	B	A	B
*synopGBS1064	120.3	2A	TGCAGTACACGAACCAGGACTTGTCTTCCCTGTTCGCCTCTCCGTCTATTTCTCCTGTTCGCC	C/G	0	13298	-1	24	1	91	100	14	0.946524	A	B	B	B	B	-	B	B	A	A	A	B	A	A	B	B	B	A	A	B	B	B	A	B	A	A	-	A	B	B	B	B	B	B	A	B
*synopGBS1329	120.3	2A	TGCAGTGTCCAAAGGAACTACATCTCACGCCCCAGGCAGCAGCCCAAGCTGCCTGGGGCGGAC	A/G	0	15323	-1	40	3	79	98	14	0.871658	A	B	B	B	B	-	B	B	A	A	A	B	A	A	B	-	B	A	A	-	B	B	A	B	A	A	-	A	B	B	B	B	B	B	A	B
*synopGBS820	121.14	2A	TGCAGGCCTTAACTAAGCTCCGCCGCTAGCCCAAACATTTCTTCCATCATCCGTGGCTCCCGC	A/G	0	10963	-1	33	3	74	91	11	0.823529	A	B	B	B	B	-	B	B	A	A	A	B	A	A	B	-	B	A	A	-	B	B	A	B	A	A	-	A	B	B	B	B	B	B	A	B
*synopGBS1328	122.03	2A	TGCAGTGTCCAAAGGAACTACATCTCACGCCCCAGGCAGCAGCCCAAGCTGCCTGGGGCGGAC	A/G	0	15322	-1	15	3	79	98	14	0.871658	A	B	B	B	B	-	B	B	A	A	A	B	A	A	B	-	B	A	A	-	B	B	A	B	A	A	-	A	B	B	B	B	B	B	A	B
*synopGBS179	122.03	2A	TGCAGAGAGAAGCGACGGGGAAGACAAGACCAACCGACACAAGTGCCGCTCCTTCCTTCCTTT	A/G	0	1745	-1	5	3	73	88	11	0.802139	A	B	B	B	B	-	B	B	A	-	A	B	A	A	B	-	B	A	A	-	B	B	A	B	A	A	-	A	B	B	-	B	B	B	A	B
*synopGBS44	122.03	2A	TGCAGAACCTTGTTCTCTTACTCGGCCCTTCATATGGTGCCTTGTCCCTGCTGTTTGTAGGCC	T/C	0	444	-1	37	3	99	81	15	0.882353	A	B	B	B	-	A	B	B	A	-	A	B	A	A	B	-	B	A	-	A	B	B	A	-	A	A	-	-	B	B	-	B	B	B	A	B
*synopGBS45	122.03	2A	TGCAGAACCTTGTTCTCTTACTCGGTCCTTCATATGGCGCCTTGTCCCTGCTGTTTGTAGGCC	C/T	0	445	-1	37	1	81	99	15	0.882353	A	B	B	B	-	A	B	B	A	-	A	B	A	A	B	-	B	A	-	A	B	B	A	-	A	A	-	-	B	B	-	B	B	B	A	B
*synopGBS1304	1.77	2B	TGCAGTGCTGTTTCACCAAGGAGGTGTGGTGTCAAATTCAGAGAACGCAAAGCACATTGTGCG	A/G	0	15042	-1	14	3	66	96	6	0.834225	A	B	A	-	A	A	B	B	A	-	B	B	B	A	B	B	B	A	A	B	-	B	B	B	B	B	A	B	B	B	-	-	B	-	-	A
*synopGBS764	2.58	2B	TGCAGGCACACACGTAGGCTATCTCGTCTAGGACGTCTGTCGCCCATGGCCATGGCGACGCCG	G/T	0	10495	-1	47	3	70	100	5	0.882353	A	B	A	A	A	A	B	B	A	A	B	B	B	A	B	B	B	A	A	B	B	B	B	B	B	B	A	B	B	B	A	B	B	B	-	A
*synopGBS765	2.58	2B	TGCAGGCACACACGTAGGCTATCTCGTCTAGGACGTCTGTCGCCCATGGCCATGGCGACGCCG	G/A	0	10496	-1	59	3	70	100	5	0.882353	A	B	A	A	A	A	B	B	A	A	B	B	B	A	B	B	B	A	A	B	B	B	B	B	B	B	A	B	B	B	A	B	B	B	-	A
*synopGBS978	4.18	2B	TGCAGGTCTGGCCCGAAGCAGAGGAGAAGGCACGCCTCGGCGGCCGCAATTGGGAAGGCAGCG	A/C	0	12519	-1	16	3	102	68	9	0.860963	A	B	A	A	A	A	B	B	A	A	B	B	B	A	B	B	B	A	A	B	B	B	B	B	B	B	A	B	B	B	A	A	B	B	A	A
*synopGBS1199	10.79	2B	TGCAGTCGGAGAAGATTCGCAGAACATCAAGCAGAGTCGTGGGGGAGCGACAACCACGAAAAG	C/T	0	14341	-1	6	3	68	91	5	0.823529	A	B	A	A	A	A	B	B	A	B	B	B	A	A	B	B	B	A	A	B	B	B	B	B	B	B	A	B	B	B	A	A	B	B	A	A
*synopGBS1215	10.79	2B	TGCAGTCTATCTAATCTAAAACTAAACATTTGGTTGAACAAACATGCTTGCCCTCGACCCGAC	A/G	0	14456	-1	18	3	71	104	9	0.887701	A	B	A	A	A	A	B	B	A	B	B	B	A	A	B	B	B	A	A	B	B	B	B	B	B	B	A	B	B	B	A	A	B	B	A	A
*synopGBS328	11.64	2B	TGCAGATTTGGATTCAGCCAGAATCTCCGAAGCAGCTCGTTGCTATGTTCAGAAACCTGACCT	C/T	0	3390	-1	37	2	82	75	3	0.823529	A	B	A	A	A	A	B	B	A	B	B	B	A	A	B	B	B	A	A	B	B	B	B	B	B	B	A	B	B	B	A	A	B	B	A	A
*synopGBS329	11.64	2B	TGCAGATTTGGATTCAGCCAGAATCTCCGAAGCAGCTCGTTGCTATGTTCAGAAACCTGACCT	C/T	0	3391	-1	42	2	82	75	3	0.823529	A	B	A	A	A	A	B	B	A	B	B	B	A	A	B	B	B	A	A	B	B	B	B	B	B	B	A	B	B	B	A	A	B	B	A	A
*synopGBS695	11.64	2B	TGCAGGACAGAATAAGCCAGTGTCCATCGATTGGTTGACATATGGACCTGATTGGACACAATA	A/G	0	9781	-1	45	1	68	108	6	0.909091	A	B	A	A	A	A	B	B	A	B	B	B	A	A	B	B	B	A	A	B	B	B	B	B	B	B	A	B	B	B	A	A	B	B	A	A
*synopGBS758	12.49	2B	TGCAGGCAACAGCGGCGGAGCCAACGGACTGCCGTTGGGTTCAGTTGAACCCAACAAAACTTG	C/T	0	10451	-1	9	3	80	80	7	0.818182	A	B	A	A	A	A	B	B	A	B	B	B	A	A	B	B	B	A	A	B	B	B	B	B	B	B	A	B	B	B	A	A	B	B	A	A
*synopGBS759	12.49	2B	TGCAGGCAACAGCGGCGGAGCCAACGGACTGCCGTTGGGTTCAGTTGAACCCAACAAAACTTG	C/T	0	10452	-1	31	3	80	80	7	0.818182	A	B	A	A	A	A	B	B	A	B	B	B	A	A	B	B	B	A	A	B	B	B	B	B	B	B	A	B	B	B	A	A	B	B	A	A
*synopGBS789	17.08	2B	TGCAGGCATAGAGGGACATTGAGTCCGTAGGCCTTCTTCTCGAGGAGCGGGAAGAAGGCTCAT	C/G	0	10659	-1	16	3	78	78	4	0.812834	A	B	A	-	A	A	B	B	A	B	-	B	A	A	B	A	B	A	A	B	B	B	B	B	B	B	A	B	B	B	A	A	B	B	A	A
*synopGBS790	17.08	2B	TGCAGGCATAGAGGGACATTGAGTCCGTAGGCCTTCTTCTCGAGGAGCGGGAAGAAGGCTCAT	T/G	0	10660	-1	18	3	78	78	4	0.812834	A	B	A	-	A	A	B	B	A	B	-	B	A	A	B	A	B	A	A	B	B	B	B	B	B	B	A	B	B	B	A	A	B	B	A	A
*synopGBS791	17.08	2B	TGCAGGCATAGAGGGACATTGAGTCCGTAGGCCTTCTTCTCGAGGAGCGGGAAGAAGGCTCAT	G/A	0	10661	-1	48	3	78	78	4	0.812834	A	B	A	-	A	A	B	B	A	B	-	B	A	A	B	A	B	A	A	B	B	B	B	B	B	B	A	B	B	B	A	A	B	B	A	A
*synopGBS93	17.94	2B	TGCAGACAACATATGGACAATGAGCGCGAAATTTAGCAACGGCACTGTTTGCAAGCCTGAAAC	C/T	0	967	-1	17	3	79	84	4	0.850267	A	B	A	-	A	A	B	B	A	B	A	B	A	A	B	A	B	A	A	B	B	B	B	B	B	B	A	B	B	B	A	A	B	B	A	A
*synopGBS94	17.94	2B	TGCAGACAACATATGGACAATGAGCGCGAAATTTAGCAACGGCACTGTTTGCAAGCCTGAAAC	C/T	0	968	-1	44	3	79	84	4	0.850267	A	B	A	-	A	A	B	B	A	B	A	B	A	A	B	A	B	A	A	B	B	B	B	B	B	B	A	B	B	B	A	A	B	B	A	A
*synopGBS1248	18.84	2B	TGCAGTGACAATGTCGGCAATCAGTCCCTGCACACGCCCACTGTTATGATTGCAGAACCATGA	A/T	0	14648	-1	7	3	100	65	11	0.823529	A	B	A	B	A	A	B	B	A	B	A	B	A	A	B	A	B	A	A	B	B	B	B	B	B	B	A	B	B	B	A	A	B	B	A	A
*synopGBS326	22.32	2B	TGCAGATTGTCCCTTCTCTGTTTAGCCTTAATTTGCCACAGTTGATTAGCCAGTGACAATATG	C/G	0	3331	-1	17	3	91	80	4	0.893048	A	B	A	B	A	A	B	B	A	B	A	B	A	-	B	A	B	A	A	B	B	B	B	B	B	B	A	A	B	B	A	A	B	B	A	A
*synopGBS1254	23.12	2B	TGCAGTGAGCATGGAGGAGGAAGGAAAGCTCACCCCCCTCCTCAAGACGCCACTCGTGCTGGT	C/T	0	14694	-1	32	3	81	86	8	0.850267	A	B	A	B	A	A	B	B	A	B	A	B	A	B	B	A	B	A	A	B	-	-	B	B	B	B	A	A	B	B	A	A	B	B	A	A
*synopGBS1127	38.63	2B	TGCAGTAGTTCGAGTGGTAGAGAACGTTAACTCCCGATCGTGTGGTCCAGAGTTCGAGTCATC	C/T	0	13677	-1	46	3	77	81	4	0.823529	A	B	A	B	A	A	B	B	A	B	A	B	A	B	B	A	B	A	A	-	A	A	B	-	B	B	B	A	B	B	A	A	B	A	A	A
*synopGBS1433	39.51	2B	TGCAGTTGCCAGGAGAAACGTGGCGCGCGCGCACCTGTGCGACGGTCTTTCCTCTGGCCATGG	C/T	0	16049	-1	42	3	84	76	3	0.839572	A	B	A	B	A	A	B	B	A	B	A	B	A	B	B	A	B	A	A	-	A	A	B	A	B	B	B	A	B	B	A	A	B	A	A	A
*synopGBS190	39.51	2B	TGCAGAGCACACACAAATTGCTCACTCACTGCCTCACTGGGTACGGCTCACCAAGCTCAAATG	A/G	0	1851	-1	8	1	76	86	5	0.839572	A	B	A	B	A	A	B	B	A	B	A	B	A	B	B	A	B	A	A	A	A	A	B	A	B	B	B	A	B	B	A	A	B	A	A	A
*synopGBS616	44.15	2B	TGCAGCTGGATTACTCGGCGGAGCCGCAGAGGATCGCCGATTCGACGGGGGTTCCGACGGTGT	C/T	0	8830	-1	37	3	86	78	7	0.839572	A	B	A	B	A	A	B	B	A	B	A	B	A	B	B	A	B	A	A	A	B	A	B	A	B	B	B	A	B	B	A	A	B	A	A	A
*synopGBS1083	45.03	2B	TGCAGTACTACCAGCATTATTATCTCACTTGCCGTTCAGCCCTCCACGGCACGGGCTATGCCA	A/C	0	13409	-1	57	3	80	80	4	0.834225	A	B	A	B	A	A	B	B	A	B	A	B	A	B	B	A	B	A	A	A	B	A	B	A	B	B	B	A	B	B	A	A	B	A	A	A
*synopGBS556	45.03	2B	TGCAGCTAGTGGACGGGGCCCGCCGTCGTCGTCGTTGCTATCTTATCCCTCTCCGTGTATGAC	A/G	0	7932	-1	58	2	87	90	16	0.860963	A	B	A	B	A	A	B	B	A	B	A	B	A	B	B	A	B	A	A	A	B	A	B	A	B	B	B	A	B	B	A	A	B	A	A	A
*synopGBS257	47.97	2B	TGCAGATCGTGCATCGTCGGCTATGGCAATGCCAACACCGCGTGCTGCACAGGGGAGTCAAGC	C/T	0	2750	-1	40	3	82	89	4	0.893048	A	B	A	B	A	A	B	B	A	B	A	B	A	B	B	A	B	A	A	A	B	A	B	A	B	B	B	A	B	B	B	A	B	A	A	A
*synopGBS269	47.97	2B	TGCAGATGAACTGCCCGAGAAGCAGGGGACAGCGCGATCACGCGAGGCGGCGGGGACTCAGCA	A/G	0	2839	-1	23	3	81	85	7	0.850267	A	B	A	B	A	A	B	B	A	B	A	B	A	B	B	A	B	A	A	A	B	A	B	A	B	B	B	A	B	B	B	A	B	A	A	A
*synopGBS283	47.97	2B	TGCAGATGCCCAATGGCCCAGGGCCTATGGCACGCGATGAGCGAGCACTTGTGCATGCCGCGG	C/T	0	2954	-1	18	1	82	86	5	0.871658	A	B	A	B	A	A	B	B	A	B	A	B	A	B	B	A	B	A	A	A	B	A	B	A	B	B	B	A	B	B	B	A	B	A	A	A
*synopGBS428	47.97	2B	TGCAGCCAGCACCTCCGCAAGTCAGAGACGGCGCAGCTGCCGCAGCCAGGGCCAGCCCAAAAC	A/G	0	5416	-1	19	3	74	86	4	0.834225	A	B	A	B	A	A	B	B	A	B	A	B	A	B	B	A	B	A	A	A	B	A	B	A	B	B	B	A	B	B	B	A	B	A	A	A
*synopGBS693	47.97	2B	TGCAGGACAACCTGAGGAGTATGCAAGGCAGGACAGCAGCCCCTGCGGCCAGCAACAACCCCC	T/C	0	9759	-1	19	3	83	82	5	0.855615	A	B	A	B	A	A	B	B	A	B	A	B	A	B	B	A	B	A	A	A	B	A	B	A	B	B	B	A	B	B	B	A	B	A	A	A
*synopGBS716	47.97	2B	TGCAGGAGACGCAAGTTGTAGTTGTGCCTACTAGTGTTGTTTTTGGAGCTTTGGGGATTGGCC	A/G	0	9993	-1	8	1	77	92	4	0.882353	A	B	A	B	A	A	B	B	A	B	A	B	A	B	B	A	B	A	A	A	B	A	B	A	B	B	B	A	B	B	B	A	B	A	A	A
*synopGBS9	47.97	2B	TGCAGAAAAATAACGTGACAAGTGACATGGAGCTCGAGCTACACCACTTACCACGAGGCAGTG	C/G	0	34	-1	41	3	90	67	5	0.812834	A	B	A	B	A	A	B	B	A	B	A	B	A	B	B	A	B	A	A	A	B	A	B	A	B	B	B	A	B	B	B	A	B	A	A	A
*synopGBS1268	48.77	2B	TGCAGTGCACACTGTGCCGAAACGGAAACATCACCAGCAGCTAGCTACGGGGGACGTCGACAC	C/G	0	14793	-1	11	3	81	84	6	0.850267	A	B	A	B	A	A	B	B	A	B	A	B	A	B	B	A	B	A	A	A	B	A	B	A	B	B	B	A	B	B	B	A	B	A	A	A
*synopGBS729	48.77	2B	TGCAGGAGTGCCCAAGTCTCAGGAAAATCACGGTGATCAGCCCCCACCTGCGGAGTTTCACCA	A/G	0	10227	-1	13	3	85	80	5	0.855615	A	B	A	B	A	A	B	B	A	B	A	B	A	B	B	A	B	A	A	A	B	A	B	A	B	B	B	A	B	B	B	A	B	A	A	A
*synopGBS730	48.77	2B	TGCAGGAGTGCCCAAGTCTCAGGAAAATCACGGTGATCAGCCCCCACCTGCGGAGTTTCACCA	G/A	0	10228	-1	21	3	85	80	5	0.855615	A	B	A	B	A	A	B	B	A	B	A	B	A	B	B	A	B	A	A	A	B	A	B	A	B	B	B	A	B	B	B	A	B	A	A	A
*synopGBS812	48.77	2B	TGCAGGCCCTTTGTCTCTATCATGCTCAGCGTGAACTTGGCTCTCACCTCTTTGTCTTTGCGG	C/T	0	10858	-1	26	3	83	82	7	0.84492	A	B	A	B	A	A	B	B	A	B	A	B	A	B	B	A	B	A	A	A	B	A	B	A	B	B	B	A	B	B	B	A	B	A	A	A
*synopGBS813	48.77	2B	TGCAGGCCCTTTGTCTCTATCATGCTCAGCGTGAACTTGGCTCTCACCTCTTTGTCTTTGCGG	G/C	0	10859	-1	61	3	83	82	7	0.84492	A	B	A	B	A	A	B	B	A	B	A	B	A	B	B	A	B	A	A	A	B	A	B	A	B	B	B	A	B	B	B	A	B	A	A	A
*synopGBS893	49.66	2B	TGCAGGGCGTGGAGAACGTCGCCGCAATGGAAGATTGGAGGATAGCACCGAGGGGGATCCGAG	A/G	0	11783	-1	14	3	73	83	2	0.823529	A	B	A	B	A	A	B	B	A	B	A	B	A	B	B	A	B	A	A	A	B	A	B	A	B	B	B	A	B	B	B	A	B	A	A	A
*synopGBS355	53.87	2B	TGCAGCACGAACTTCGGGTTGAGGTCCTTCCACCGCGACGGGACGCTGAGCTCGAGCTCCCGA	C/T	0	4082	-1	5	3	77	102	7	0.919786	A	B	A	B	A	A	B	B	A	B	A	B	A	B	B	A	B	A	A	A	B	A	B	A	B	B	B	A	B	B	B	A	B	A	A	A
*synopGBS987	56.33	2B	TGCAGGTGTGCCTAGAAGGATCGGGGAGGGCTAGACGGAGTCGGAATTGCCGCCGAGGTCACG	A/C	0	12784	-1	15	3	78	80	2	0.834225	A	B	A	B	A	A	B	B	A	B	A	B	A	B	B	A	B	A	A	A	B	A	B	A	B	B	B	A	B	B	B	A	B	A	A	A
*synopGBS256	57.29	2B	TGCAGATCGTAGCACAAATCCGCACCGCACAAGAGCCGTGCATCCTCAAGCCACCGCCACCAC	A/G	0	2745	-1	52	3	84	71	5	0.802139	A	B	A	B	A	A	B	B	A	B	A	B	A	B	B	A	B	A	A	A	B	A	B	A	B	B	B	A	B	B	B	A	B	A	A	A
*synopGBS265	57.29	2B	TGCAGATCTGTTCTGCCAGTTTCCCCCTTCACGAGCGACTAATTCGTGCTAATCGGTGCGGCG	C/T	0	2809	-1	48	3	85	92	6	0.914439	A	B	A	B	A	A	B	B	A	B	A	B	A	B	B	A	B	A	A	A	B	A	B	A	B	B	B	A	B	B	B	A	B	A	A	A
*synopGBS728	58.96	2B	TGCAGGAGGGGCAGAAAAAGAGAGTAAAAGCATGGCCATGGACAGAGCGCAGCACAGCTTGAT	G/T	0	10188	-1	44	3	80	81	6	0.828877	A	B	A	B	A	A	B	B	A	B	A	B	A	B	B	A	A	A	A	A	B	A	B	A	B	B	B	A	B	B	B	A	B	A	A	A
*synopGBS1101	59.78	2B	TGCAGTAGATCAGGCGTTTGTAGCTTGACTGAACGCAATTGAAGTCTTTCCTCATAGTCGGGC	T/G	0	13511	-1	39	3	83	85	2	0.887701	A	B	A	B	A	A	B	B	A	B	A	B	A	B	B	A	A	A	A	A	B	A	B	A	B	B	B	A	B	B	B	A	B	A	A	A
*synopGBS20	60.6	2B	TGCAGAAAGCTATTTTCTTTTGTGCTGAAGTATATTGCTTGTGTCTGAAACAGACCCCTGTCG	A/G	0	196	-1	53	3	83	82	7	0.84492	A	B	A	B	A	A	B	B	A	B	A	B	A	B	B	A	A	A	A	A	B	A	B	A	B	B	B	A	B	B	B	A	B	A	A	A
*synopGBS846	61.47	2B	TGCAGGCTGCATCGTCATTCATAATTGACCACTTTAATCTTGGAAGCCATCAACCATGCCGAT	C/T	0	11362	-1	6	3	73	82	4	0.807487	A	B	A	B	A	A	B	B	A	B	A	B	A	B	B	A	A	A	A	A	B	A	B	A	B	B	B	A	B	B	B	A	B	A	A	A
*synopGBS207	63.1	2B	TGCAGATACCGCAACCTCACCGACTCATTTGTTGTTACAAAGAGAATGTCGGCTGGGATTAGA	G/T	0	2368	-1	21	3	85	89	6	0.898396	A	B	A	B	A	A	B	B	A	B	A	B	A	B	B	A	A	A	A	A	B	A	B	A	B	B	B	A	B	B	B	A	B	A	A	A
*synopGBS880	63.1	2B	TGCAGGGATATTCAGGCATCCGCTTCGAGATCCTGGAGACAGTCGCCACGCTTCTCAACGCCA	C/T	0	11610	-1	55	3	88	88	8	0.898396	A	B	A	B	A	A	B	B	A	B	A	B	A	B	B	A	A	A	A	A	B	A	B	A	B	B	B	A	B	B	B	A	B	A	A	A
*synopGBS1163	63.95	2B	TGCAGTCATAATCTCTCCACATCTCGGTGCAATAACAGTTGAACCCTTTGCAGCGTATAAGAT	A/G	0	13988	-1	10	3	73	80	3	0.802139	A	B	A	B	A	A	B	B	A	B	A	B	A	B	B	A	A	A	A	A	B	A	B	A	B	B	B	A	B	B	B	A	B	A	A	A
*synopGBS1295	63.95	2B	TGCAGTGCGCGTAGCAGTTGAATTGTACTGATCCGAGCATGGCGCCACCCATATAATTGTTGG	C/T	0	14965	-1	63	1	94	81	12	0.871658	A	B	A	B	A	A	B	B	A	B	A	B	A	B	B	A	A	A	A	A	B	A	B	A	B	B	B	A	B	B	B	A	B	A	A	A
*synopGBS879	68.7	2B	TGCAGGGAGGGGCGAGGGAGAAGGCCCAGTTGGCCACGAAATTCGGCATCACGACAGCCAGGG	A/C	0	11589	-1	53	3	76	81	5	0.812834	A	B	A	B	A	A	B	B	A	B	A	B	A	B	B	A	A	A	A	A	B	A	B	A	B	B	A	A	B	B	B	A	B	A	A	A
*synopGBS69	69.58	2B	TGCAGAATCAGGGCTAGGGGGAAGGGAACCTTGACGGACCAGCAGAGAGCGCCCTCGCGGTCG	C/G	0	762	-1	42	1	79	79	2	0.834225	A	B	A	B	B	A	B	B	A	B	-	B	A	B	B	A	A	A	A	A	B	A	B	A	B	B	A	A	B	B	B	A	B	A	A	A
*synopGBS146	70.38	2B	TGCAGACCTTCGCCTGCCTACCTGCCGCCTCCTTGCTACTTCCTCCTCAGGCTTCGTCCCGCC	A/G	0	1325	-1	19	3	88	88	9	0.893048	A	B	A	B	A	A	B	B	A	B	-	B	A	B	B	A	A	A	A	A	B	A	B	A	B	B	A	A	B	B	B	A	B	A	A	A
*synopGBS164	70.38	2B	TGCAGACTAAAAGCGTCTCCGTCGATCCAAAGGCACAATGCAATGCACGTAGACTAGCCTACA	A/C	0	1496	-1	50	1	84	87	7	0.877005	A	B	A	B	A	A	B	B	A	B	-	B	A	B	B	A	A	A	A	A	B	A	B	A	B	B	A	A	B	B	B	A	B	A	A	A
*synopGBS496	71.13	2B	TGCAGCCTTGAAACGGTTGTCTCTGTTACACGCCGTCAGGCCCATCTACTGCTATGCCACAAC	A/G	0	6621	-1	37	3	91	88	8	0.914439	A	B	A	B	B	A	B	B	A	B	-	B	A	B	B	A	A	A	A	A	B	A	B	A	B	B	A	A	B	B	B	A	B	A	A	A
*synopGBS561	71.13	2B	TGCAGCTATCAACTAGCGCGGCGACGATAAACTATTACTGCCATGCGAGCCATGCCATTAAGG	C/T	0	7954	-1	37	2	87	87	8	0.887701	A	B	A	B	B	A	B	B	A	B	B	B	A	B	B	A	A	A	A	A	B	A	B	A	B	B	A	A	B	B	B	A	B	A	A	A
*synopGBS636	72.77	2B	TGCAGCTTCCTGGGGGTGCATCGGTCGTGCGGAGGTGGCCAATGGCCATAACGCGAGGATCGT	C/G	0	9154	-1	18	3	90	81	9	0.86631	A	B	A	B	A	A	B	B	A	B	B	B	A	B	B	A	A	A	A	A	B	A	B	A	B	B	A	A	B	B	B	A	B	A	A	A
*synopGBS798	72.77	2B	TGCAGGCCAAGCCCTCCTCCATCTACAAGTGGTGGCGAGGGGCCACGATGGACGGCGATGGGG	A/G	0	10724	-1	8	3	83	84	8	0.850267	A	B	A	B	A	A	B	B	A	B	B	B	A	B	B	A	A	A	A	A	B	A	B	A	B	B	A	A	B	B	B	A	B	A	A	A
*synopGBS1175	73.63	2B	TGCAGTCCGAAAGAGAGAGAGAGATATTTGATCCATCCCCGTGCACCGTGCGCGCCACGCACG	C/G	0	14155	-1	46	3	75	87	4	0.84492	A	B	A	B	B	A	B	B	A	B	B	B	A	B	B	A	A	A	A	A	B	A	B	A	B	B	A	A	B	B	B	A	B	A	A	A
*synopGBS801	73.63	2B	TGCAGGCCATGATCGTCAAGATAGCGGTGCCCGTGCTGGCCATGCTGCTGCTGCTGCTCACGG	G/C	0	10792	-1	38	2	86	85	7	0.877005	A	B	A	B	-	A	B	B	A	B	B	B	A	B	B	A	A	A	A	A	B	A	B	A	B	B	A	A	B	B	B	A	B	A	A	A
*synopGBS802	73.63	2B	TGCAGGCCATGATCGTCAAGATCGCGGTGCCCGTGCTGCCCATGCTGCTGCTGCTGCTCACCG	C/G	0	10793	-1	38	2	85	81	5	0.860963	A	B	A	B	-	A	B	B	A	B	B	B	A	B	B	A	A	A	A	A	B	A	B	A	B	B	A	A	B	B	B	A	B	A	A	A
*synopGBS1188	74.55	2B	TGCAGTCGAACCACGTCGCCATGGTCGACCTCATCCTTGTGGCCACTACCCCCCCGCCGCCTG	A/G	0	14257	-1	47	3	84	73	7	0.802139	A	B	A	B	A	A	B	B	A	B	B	B	A	B	B	A	A	A	A	A	B	A	B	A	B	B	A	A	B	B	B	A	B	A	A	A
*synopGBS1320	74.55	2B	TGCAGTGGTCGCTGCCGTGCCCTGCTTTTGCATGCACCACGGCTACGGCCAGGCCCTGCTTGT	C/T	0	15220	-1	15	3	81	90	6	0.882353	A	B	A	B	A	A	B	B	A	B	B	B	A	B	B	A	A	A	A	A	B	A	B	A	B	B	A	A	B	B	B	A	B	A	A	A
*synopGBS1456	75.34	2B	TGCAGTTGTGGAGGGGAGAGGATCCAAACAGGGCCTAATTAACCACTTGATCATATCATGATG	A/G	0	16243	-1	25	3	83	89	4	0.898396	A	B	A	B	B	A	B	B	A	B	B	B	A	B	B	A	A	A	A	A	B	A	B	A	B	B	A	A	B	B	B	A	B	A	A	A
*synopGBS13	76.15	2B	TGCAGAAAATGCTTGCTGGGTTGGCCCAGCTAAGCTGGCTTCATTCAAGCCTTGGTTATTTGC	C/G	0	103	-1	62	3	80	82	6	0.834225	A	B	A	B	A	A	B	B	A	B	B	B	A	B	B	A	A	A	A	A	B	A	B	A	B	B	A	A	B	B	B	A	B	A	A	A
*synopGBS788	77.85	2B	TGCAGGCATACTTCCTTCCACGAGGCCAACACTAACATGTGCGTTCTGTTTGGATTGGCCACG	G/A	0	10658	-1	21	2	82	94	9	0.893048	A	B	A	B	-	A	B	B	A	B	B	B	A	B	B	A	A	A	A	A	B	A	B	A	B	B	A	A	B	B	B	A	B	A	A	A
*synopGBS1337	78.67	2B	TGCAGTGTGCAGCATGCAACCTCCCACGTGTTGCGTCAGCGTCAGTCACTGACACCTCCTGCC	A/C	0	15361	-1	37	2	86	80	4	0.86631	A	B	A	B	B	A	B	B	A	B	B	B	A	B	B	A	A	A	A	A	B	A	B	A	B	B	A	A	B	B	B	A	B	B	A	A
*synopGBS162	78.67	2B	TGCAGACGTTTTGGCTTTTGCTGGGGCGTACAAGAGCGATCATTGGGTGTCACCACAAAAACA	G/A	0	1494	-1	27	3	82	85	5	0.86631	A	B	A	B	B	A	B	B	A	B	B	B	A	B	B	A	A	A	A	A	B	A	B	A	B	B	A	A	B	B	B	A	B	B	A	A
*synopGBS163	78.67	2B	TGCAGACGTTTTGGCTTTTGCTGGTGCATACAAGAGCGATCATTGGGCGTCACCACAAAAACA	A/G	0	1495	-1	27	2	85	82	5	0.86631	A	B	A	B	B	A	B	B	A	B	B	B	A	B	B	A	A	A	A	A	B	A	B	A	B	B	A	A	B	B	B	A	B	B	A	A
*synopGBS388	78.67	2B	TGCAGCATGCTACGTGTCAGGCGACACGTACACGTTTCAGGCGCATGCAGTGCAGGGGCACGC	A/G	0	4982	-1	29	3	90	72	7	0.828877	A	B	A	B	B	A	B	B	A	B	B	B	A	B	B	A	A	A	A	A	B	A	B	A	B	B	A	A	B	B	B	A	B	B	A	A
*synopGBS565	78.67	2B	TGCAGCTATGCACCATCGCGTCGCCTCAGTCTCTCGGATGTGTGCGACTTGGTGGGCGGCCAT	C/G	0	7982	-1	34	1	84	91	5	0.909091	A	B	A	B	B	A	B	B	A	B	B	B	A	B	B	A	A	A	A	A	B	A	B	A	B	B	A	A	B	B	B	A	B	B	A	A
*synopGBS651	78.67	2B	TGCAGCTTGTTGTCGTCGTCCTGACGACGATGATACAAGTACTTGTCAAGGCTTCAGTTGGGC	A/C	0	9357	-1	55	1	85	79	3	0.860963	A	B	A	B	B	A	B	B	A	B	B	B	A	B	B	A	A	A	A	A	B	A	B	A	B	B	A	A	B	B	B	A	B	B	A	A
*synopGBS894	78.67	2B	TGCAGGGCTGAGCTTTACACCAACGAAACTCCACCATCAGATCAGCCGTACGAACCCCCGCGG	C/T	0	11800	-1	33	3	80	75	4	0.807487	A	B	A	B	B	A	B	B	A	B	B	B	A	B	B	A	A	A	A	A	B	A	B	A	B	B	A	A	B	B	B	A	B	B	A	A
*synopGBS1231	79.49	2B	TGCAGTCTGGGACCGCCTTGGCAAGATGACAGGGAGCATGCAAAGGAGGGCTCAGGAGGTATT	G/A	0	14531	-1	54	3	91	76	11	0.834225	A	B	A	B	B	A	B	B	A	B	B	B	A	B	B	A	A	A	A	A	B	A	B	A	B	B	A	A	B	B	B	A	B	B	A	A
*synopGBS38	79.49	2B	TGCAGAACATGGCCCGCTTGACGGTAATTGGCTAATTGCTAAGCGCACATTGGACGCTGGTTT	A/G	0	403	-1	6	3	103	81	11	0.925134	A	B	A	B	B	A	B	B	A	B	B	B	A	B	B	A	A	A	A	A	B	A	B	A	B	B	A	A	B	B	B	A	B	B	A	A
*synopGBS779	79.49	2B	TGCAGGCAGAGGAAAGACTTCCCTTTGCCCAGCGTCCGCAACTCATCAGCGCAACCACAACAC	A/G	0	10590	-1	47	3	100	72	6	0.887701	A	B	A	B	B	A	B	B	A	B	B	B	A	B	B	A	A	A	A	A	B	A	B	A	B	B	A	A	B	B	B	A	B	B	A	A
*synopGBS476	81.95	2B	TGCAGCCTCGCCGTGCTCCGCTGCCGCTGGGCTATGCCATGCCCTATTGAGCCGCCTCGGCAT	A/C	0	6435	-1	49	3	90	75	6	0.850267	A	B	A	B	B	A	B	B	A	B	B	B	A	B	B	A	A	A	A	A	B	A	B	A	B	B	A	A	B	B	B	A	B	B	A	A
*synopGBS1352	94.19	2B	TGCAGTTACGTCGCTGAAGCTCAGTCCAGCCAAGGCATCTCCGACAAAGATGGACACGAAGAC	A/C	0	15518	-1	59	3	82	90	4	0.898396	A	B	A	B	B	A	B	B	A	B	B	B	A	B	B	A	A	B	A	A	B	B	B	A	B	B	A	A	B	B	A	A	B	B	A	A
*synopGBS196	94.19	2B	TGCAGAGCATTGGCGACATATGGCGCGTCCACGACATGCGTGCGCAAGAAGACAAGCACGATC	G/C	0	1899	-1	39	2	100	83	9	0.930481	A	B	A	B	B	A	B	B	A	B	B	B	A	B	B	A	A	B	A	A	B	B	B	A	B	B	A	A	B	B	A	A	B	B	A	A
*synopGBS1412	94.98	2B	TGCAGTTGAATCGCAGAGAATCTTGGTTATGCTCTGGAGATCAACAACTGCTCGAAAAATCAG	A/T	0	15967	-1	58	3	84	93	8	0.903743	A	B	A	B	B	A	B	B	A	B	B	B	A	B	B	A	A	B	A	A	B	B	B	A	B	B	A	A	B	B	A	A	B	B	A	A
*synopGBS517	94.98	2B	TGCAGCGTCATAAGAGAGCAAGCACCGTGAAATCTGTTCATGCAGTTGACAGAATATGGCCGC	C/T	0	7496	-1	5	1	88	74	4	0.84492	A	B	A	B	B	A	B	B	A	B	B	B	A	B	B	A	A	B	A	A	B	B	B	A	B	B	A	A	B	B	A	A	B	B	A	A
*synopGBS925	94.98	2B	TGCAGGTAATTCGCATCCATGTTTCATGCAAAGAAAAAGCATCCGTCTTCTTCTCGCGAGTTT	C/T	0	12141	-1	54	3	67	97	6	0.84492	A	B	A	B	B	A	B	B	A	B	B	B	A	B	B	A	A	B	A	A	B	B	B	A	B	B	A	A	B	B	A	-	B	B	A	A
*synopGBS926	94.98	2B	TGCAGGTAATTCGCATCCATGTTTCATGCAAAGAAAAAGCATCCGTCTTCTTCTCGCGAGTTT	G/A	0	12142	-1	55	3	67	97	6	0.84492	A	B	A	B	B	A	B	B	A	B	B	B	A	B	B	A	A	B	A	A	B	B	B	A	B	B	A	A	B	B	A	-	B	B	A	A
*synopGBS927	94.98	2B	TGCAGGTAATTCGCATCCATGTTTCATGCAAAGAAAAAGCATCCGTCTTCTTCTCGCGAGTTT	G/C	0	12143	-1	57	3	67	97	6	0.84492	A	B	A	B	B	A	B	B	A	B	B	B	A	B	B	A	A	B	A	A	B	B	B	A	B	B	A	A	B	B	A	-	B	B	A	A
*synopGBS1092	95.87	2B	TGCAGTAGAAGCATGGCACAGAGCGGGCCCATATGATGGTTGATGGATTTGAGCTCAAATGTC	A/T	0	13481	-1	21	3	83	93	12	0.877005	A	B	A	B	B	A	B	B	A	B	B	B	A	B	B	A	A	B	A	A	B	B	B	A	B	B	A	A	B	B	A	B	B	B	A	A
*synopGBS1093	95.87	2B	TGCAGTAGAAGCATGGCACAGAGCGGGCCCATATGATGGTTGATGGATTTGAGCTCAAATGTC	C/T	0	13482	-1	23	3	83	93	12	0.877005	A	B	A	B	B	A	B	B	A	B	B	B	A	B	B	A	A	B	A	A	B	B	B	A	B	B	A	A	B	B	A	B	B	B	A	A
*synopGBS1094	95.87	2B	TGCAGTAGAAGCATGGCACAGAGCGGGCCCATATGATGGTTGATGGATTTGAGCTCAAATGTC	C/T	0	13483	-1	28	3	83	93	12	0.877005	A	B	A	B	B	A	B	B	A	B	B	B	A	B	B	A	A	B	A	A	B	B	B	A	B	B	A	A	B	B	A	B	B	B	A	A
*synopGBS1367	95.87	2B	TGCAGTTATCATCCAAGTTGAGAATTCCCATATTGCGGCGATTATTCTGAAGTCCCATTGCCC	C/T	0	15587	-1	12	3	82	82	13	0.807487	A	B	A	B	B	A	B	B	A	B	B	B	A	B	B	A	A	B	A	A	B	B	B	A	B	B	A	A	B	B	A	B	B	B	A	A
*synopGBS1368	95.87	2B	TGCAGTTATCATCCAAGTTGAGAATTCCCATATTGCGGCGATTATTCTGAAGTCCCATTGCCC	T/C	0	15588	-1	33	3	82	82	13	0.807487	A	B	A	B	B	A	B	B	A	B	B	B	A	B	B	A	A	B	A	A	B	B	B	A	B	B	A	A	B	B	A	B	B	B	A	A
*synopGBS420	95.87	2B	TGCAGCCACGTGCTCCTCGACGGCATCAGCGCCGCGCTGCTTTGCCGCCTCCGTTGCGCCGAG	C/T	0	5365	-1	8	3	79	85	8	0.834225	A	B	A	B	B	A	B	B	A	B	B	B	A	B	B	A	A	B	A	A	B	B	B	A	B	B	A	A	B	B	A	B	B	B	A	A
*synopGBS669	96.65	2B	TGCAGGAAAGCATGAGTCCAGGTCGACCCAAGTGCACTCAACAGCCATCTCGTATCCAGGAGG	A/C	0	9497	-1	14	3	101	85	11	0.935829	A	B	A	B	B	A	B	B	A	B	B	B	A	B	B	A	A	B	A	A	B	B	B	-	B	B	A	A	B	B	A	B	B	B	A	A
*synopGBS670	96.65	2B	TGCAGGAAAGCATGAGTCCAGGTCGACCCAAGTGCACTCAACAGCCATCTCGTATCCAGGAGG	G/A	0	9498	-1	21	3	101	85	11	0.935829	A	B	A	B	B	A	B	B	A	B	B	B	A	B	B	A	A	B	A	A	B	B	B	-	B	B	A	A	B	B	A	B	B	B	A	A
*synopGBS833	111.55	2B	TGCAGGCTACACATGTAAGATCGTGTGCTTCAAGGCCAAATTTGCAGTGTGCGTCGCCAAACT	A/G	0	11267	-1	37	1	81	101	13	0.903743	A	B	A	A	B	A	B	B	A	B	B	B	A	B	A	A	A	B	A	A	A	B	A	B	B	B	A	A	B	B	A	B	A	B	A	A
*synopGBS544	115.42	2B	TGCAGCTAGCACTTAGCTCCTGCGTGTAATAGCTAGCTGGTTGCTGCACGTACGAGATGGACG	A/C	0	7833	-1	28	3	90	93	9	0.930481	A	B	A	A	B	A	B	B	A	B	B	B	A	B	A	A	A	B	A	A	A	B	A	B	B	B	A	A	B	B	A	B	A	B	A	A
*synopGBS545	115.42	2B	TGCAGCTAGCACTTAGCTCCTGCGTGTAATAGCTAGCTGGTTGCTGCACGTACGAGATGGACG	T/C	0	7834	-1	29	3	90	93	9	0.930481	A	B	A	A	B	A	B	B	A	B	B	B	A	B	A	A	A	B	A	A	A	B	A	B	B	B	A	A	B	B	A	B	A	B	A	A
*synopGBS412	116.25	2B	TGCAGCCAAGGCGAATCATCTACACCCCTCAACGGCCGCATCTCGGCTTTGTCCAGCTTCGGC	G/T	0	5196	-1	12	3	91	86	7	0.909091	A	B	A	A	B	A	-	B	A	B	B	B	A	B	A	A	A	B	A	A	A	B	A	B	B	B	A	A	B	B	A	B	A	B	A	A
*synopGBS134	117.04	2B	TGCAGACCGCTCAACTTTCGCCGAAAGGCTCCTCTAGAGAGGAGAAAGGCAGGGTGGCTGTGT	C/T	0	1274	-1	7	3	84	88	9	0.871658	A	B	A	A	B	A	-	B	A	B	B	B	A	B	A	A	A	B	A	A	A	B	A	B	A	B	A	A	B	B	A	B	A	B	A	A
*synopGBS135	117.04	2B	TGCAGACCGCTCAACTTTCGCCGAAAGGCTCCTCTAGAGAGGAGAAAGGCAGTGTGGCTGCGT	C/T	0	1275	-1	7	1	84	88	9	0.871658	A	B	A	A	B	A	-	B	A	B	B	B	A	B	A	A	A	B	A	A	A	B	A	B	A	B	A	A	B	B	A	B	A	B	A	A
*synopGBS426	117.04	2B	TGCAGCCACTGTGACCTCCTCGACGACAACAACGACCTCGGTATCCTCTTCAGCCTCCTCAGT	A/G	0	5380	-1	27	1	78	78	3	0.818182	A	B	A	A	B	-	-	B	A	B	B	B	A	-	A	-	A	B	A	A	A	B	A	B	A	B	A	A	B	B	A	B	A	B	A	A
*synopGBS1060	156.35	2B	TGCAGTACAACAACCAAACGTCGGGGTTCTCGTTCTCGCCAACATGTCCAGCAAGGACGTGGA	C/T	0	13276	-1	13	3	97	84	9	0.919786	A	B	B	A	B	B	-	A	A	B	B	B	B	-	A	B	A	B	A	B	A	A	A	B	A	B	A	B	B	B	A	-	B	A	A	A
*synopGBS680	156.35	2B	TGCAGGAAGAGGACTCTTTTGATAGCATTAATCTTGACGGGTGCGCTCGTGGTTGGACTCGCG	A/G	0	9623	-1	30	3	67	99	5	0.860963	A	B	B	A	-	-	-	A	A	B	-	-	B	A	A	B	A	-	A	B	A	A	A	-	A	B	A	B	B	-	A	A	B	A	A	A
*synopGBS781	3.23	2D	TGCAGGCAGATTGTCCCTTCTCTCTTTTGGGCTAGATTTGCACAGTTAATTAATCAGCGACAA	C/G	0	10601	-1	54	3	65	91	3	0.818182	A	B	-	-	A	-	-	-	A	-	A	A	-	-	A	-	A	A	A	-	-	-	-	A	A	A	-	-	-	-	A	A	A	A	B	-
*synopGBS1305	8.74	2D	TGCAGTGCTTACCACGTTCAAGCCATGACAGGGCTTGGAGCAAACCACCTTGGTCTCCAATCG	C/G	0	15043	-1	18	3	65	95	7	0.818182	A	B	-	-	A	-	-	-	A	-	A	A	-	-	A	-	A	A	A	-	A	-	-	A	A	A	-	-	-	-	A	A	A	A	B	A
*synopGBS302	10.61	2D	TGCAGATGTGTAGCTGTTTAAAATACTTCTGACTTCCATGTGGTAGGAGGCGCGGCAGCGGAA	C/T	0	3120	-1	63	3	95	63	7	0.807487	A	B	-	-	A	-	-	-	A	-	A	A	A	-	A	-	A	A	A	-	A	-	-	A	A	A	-	-	-	-	A	A	A	A	B	A
*synopGBS248	21.88	2D	TGCAGATCGATCCGTTGGGCATCCCCATTTCACGTGCCCCACCTTACACATGCACGCGTGTCG	C/G	0	2706	-1	42	3	92	66	4	0.823529	A	B	-	-	A	-	-	-	A	-	A	A	A	-	A	-	A	A	A	-	A	-	-	A	A	A	-	-	-	-	A	A	A	A	B	A
*synopGBS5	21.88	2D	TGCAGAAAAAGATACTGTAGCGCCAGCACGTGAGCCCCGCAGATCTTTTGATTGCACATGCTC	C/T	0	22	-1	14	3	69	89	6	0.812834	A	B	-	-	A	-	-	-	A	-	A	A	A	-	A	-	A	A	A	-	A	-	-	A	A	A	-	-	-	-	A	A	A	A	B	A
*synopGBS972	27.77	2D	TGCAGGTCTCGATTGGGGGGTGCGCGCGCAAGATGTAGGCGAGATTGGGGATCATGGGGCTCG	C/T	0	12507	-1	22	3	65	91	4	0.812834	A	B	-	-	A	-	-	-	A	-	A	A	A	-	A	-	A	A	A	-	A	-	-	A	A	A	-	-	-	-	A	A	A	A	B	A
*synopGBS973	27.77	2D	TGCAGGTCTCGATTGGGGGGTGCGCGCGCAAGATGTAGGCGAGATTGGGGATCATGGGGCTCG	C/G	0	12508	-1	39	3	65	91	4	0.812834	A	B	-	-	A	-	-	-	A	-	A	A	A	-	A	-	A	A	A	-	A	-	-	A	A	A	-	-	-	-	A	A	A	A	B	A
*synopGBS221	30.49	2D	TGCAGATCACGACGGACACCCGACCGATCGGCCCATCCTACGTAGAATCGCGTGTGTCGTGGG	C/G	0	2510	-1	23	3	69	96	5	0.855615	A	B	-	-	A	-	-	-	A	-	A	A	A	-	A	-	A	A	A	-	A	-	-	A	A	A	-	-	-	-	A	A	A	A	B	A
*synopGBS941	30.49	2D	TGCAGGTAGTAGCTATCCCTGGAGCGGCGCACCCACGTGTCGTCCCTGGCGGCGGACGAAGCC	A/C	0	12239	-1	14	2	93	67	7	0.818182	A	B	-	-	A	-	-	-	A	-	A	A	A	-	A	-	A	A	A	-	A	-	-	A	A	A	-	-	-	-	A	A	A	A	B	A
*synopGBS110	23.55	2D	TGCAGACAGCTGTAGTACATCATCATGAGCTCGTCGATGGAGTTGCGGGCCGCCTCCGCTACG	A/T	0	1084	-1	21	2	84	93	5	0.919786	A	B	B	-	A	B	B	B	A	B	A	A	A	B	A	B	A	A	A	B	A	B	B	A	A	A	B	B	B	B	A	A	A	A	B	A
*synopGBS1128	23.55	2D	TGCAGTAGTTTGTGTCGGGGGCAAGAAATAGCGAAACGGTTTGCTGCTTCTGTTAGGGTGGAA	C/T	0	13687	-1	15	3	85	78	4	0.850267	A	B	B	B	A	B	B	B	A	B	A	A	A	B	A	B	A	A	A	B	A	B	B	A	A	A	B	B	B	B	A	A	A	A	B	A
*synopGBS1146	23.55	2D	TGCAGTCAACCAGGTTGCCGAACACAACACTACGAGATCACCGAGTAGGACTGGTCTGAATAT	C/T	0	13864	-1	18	3	89	88	5	0.919786	A	B	B	B	A	B	B	B	A	B	A	A	A	B	A	B	A	A	A	B	A	B	B	A	A	A	B	B	B	B	A	A	A	A	B	A
*synopGBS343	23.55	2D	TGCAGCAAGGGCTTCCAAGTCCAAACCGATCATCAGCTCATGGCTTTGGATTGCAGGGCCTTG	C/G	0	3739	-1	25	3	77	83	4	0.834225	A	B	B	B	A	B	B	B	A	B	A	A	A	B	A	B	A	A	A	B	A	B	B	A	A	A	B	B	B	B	A	A	A	A	B	A
*synopGBS666	23.55	2D	TGCAGGAAACCAATTTGCATTGGAAGTTCAATGGGCTGATTAGAGATAGCCAAATGACTGGGG	A/G	0	9481	-1	47	3	79	86	5	0.855615	A	B	B	B	A	B	B	B	A	B	A	A	A	B	A	B	A	A	A	B	A	B	B	A	A	A	B	B	B	B	A	A	A	A	B	A
*synopGBS560	24.32	2D	TGCAGCTATCAACTAGCGCGCGGACGATAAACTATTATTGCCATGCGAGCCATGCCATTAAGG	C/G	0	7953	-1	49	1	83	89	4	0.898396	A	B	B	B	A	B	B	B	A	B	A	A	A	B	A	B	A	A	A	B	A	B	B	A	A	A	B	B	B	B	A	A	A	A	B	A
*synopGBS58	24.32	2D	TGCAGAAGCTGCTTTTGCACTGACGGGATTGGGGTCGTGATGGTACCTTCAATTTGGAATCTT	A/G	0	644	-1	18	2	72	87	5	0.823529	A	B	B	B	A	B	B	B	A	B	A	A	A	B	A	B	A	A	A	B	A	B	B	A	A	A	B	B	B	B	A	A	A	A	B	A
*synopGBS618	25.16	2D	TGCAGCTGGGTTCCGAGTGCTCCAGCAACCGTGCGCTTCTCGTTCGAGAAGGGGCCATCCCTC	T/C	0	8914	-1	10	3	91	98	12	0.946524	A	B	B	B	A	B	B	B	A	B	A	A	A	B	A	B	A	A	A	B	A	B	B	A	A	A	B	B	B	B	A	A	A	A	B	A
*synopGBS632	25.16	2D	TGCAGCTTCAGCAACACTTGCTCGCCGACCTGAAACTGGCGCTCGGGGCGGTTGCGATCTGCC	A/G	0	9101	-1	13	3	72	97	7	0.86631	A	B	B	B	A	B	B	B	A	B	A	A	A	B	A	B	A	A	A	B	A	B	B	A	A	A	B	B	B	B	A	A	A	A	B	A
*synopGBS579	52.59	2D	TGCAGCTCCCTGATCATGGCGAAGATCCTCTTGCCCCTGACGTAGCTGCTCCCGAAGCAGGCC	C/T	0	8192	-1	36	2	74	81	4	0.807487	A	B	B	B	A	B	B	B	A	B	A	A	A	B	A	B	B	A	B	B	B	B	A	A	B	A	B	B	B	B	A	A	B	A	B	A
*synopGBS1212	68.68	2D	TGCAGTCTACGGTCCACCACCACCAACCACCACACTACTATTTTTGGAATTGCACCACACTAC	A/G	0	14434	-1	36	3	83	81	4	0.855615	A	B	B	B	A	B	B	-	A	B	A	A	A	B	A	B	B	A	B	B	B	A	A	A	B	A	B	B	B	B	A	A	B	A	B	A
*synopGBS1310	68.68	2D	TGCAGTGGACGCGGCCCACCGAATGCGCGCCCAGCAGCGCCACCACGGCCTCCGCGCCCAGCC	A/G	0	15077	-1	22	1	75	92	7	0.855615	A	B	B	B	A	B	B	A	A	B	A	A	A	B	A	B	B	A	B	B	B	A	A	A	B	A	B	B	B	B	A	A	B	A	B	A
*synopGBS745	69.52	2D	TGCAGGATGAGAACAGTGTGCTCCGCAACGAAATTCTGGAGCTACAAAAGGAGCTGACGAGGC	G/T	0	10336	-1	60	3	91	70	5	0.834225	A	B	B	B	A	B	B	A	A	B	A	A	A	B	A	B	B	A	B	B	B	A	A	A	B	A	B	-	B	B	A	A	B	A	B	A
*synopGBS250	71.24	2D	TGCAGATCGCCCACACGTTCACGAACACGGTGGTGCCCATCGGCACATCATACCCGAGGACCT	A/G	0	2715	-1	14	3	67	90	5	0.812834	A	B	B	B	A	B	B	A	A	B	A	A	A	B	A	B	B	A	B	B	B	A	A	A	B	A	B	A	B	B	A	A	B	A	B	A
*synopGBS421	71.24	2D	TGCAGCCACTCATCAATTAGTCGTCGGGGAGTACTAGCTAATTAAGCAGGGGGGAATGATTGG	A/G	0	5368	-1	63	3	86	71	7	0.802139	A	B	B	B	A	B	B	A	A	B	A	A	A	B	A	B	B	A	B	B	B	A	A	A	B	A	B	A	B	B	A	A	B	A	B	A
*synopGBS156	86.16	2D	TGCAGACGGAAGTAGACGGTTCCCTCGGAGGCATCGAGACGGAGCGTGGCGATGCCGCGCGCC	A/G	0	1432	-1	38	2	76	90	3	0.871658	A	B	B	B	B	B	B	A	A	B	A	A	A	B	A	B	B	A	B	B	B	A	A	A	B	A	B	A	B	B	A	-	B	A	B	A
*synopGBS171	86.16	2D	TGCAGACTCGCTGTTCGGCCTCATGATCGCATTGCACTACCACATTTCTCAACAACTCGCCGT	C/T	0	1540	-1	60	3	84	90	3	0.914439	A	B	B	B	B	B	B	A	A	B	A	A	A	B	A	B	B	A	B	B	B	A	A	A	B	A	B	A	B	B	A	B	B	A	B	A
*synopGBS756	86.16	2D	TGCAGGCAAAACGACTTTCGCTTGAGGCATGTTGCCAAGCTGAGGCGTGTACTGACCTTGAGA	A/T	0	10425	-1	8	3	91	82	2	0.914439	A	B	B	B	B	B	B	A	A	B	A	A	A	B	A	B	B	A	B	B	B	A	A	A	B	A	B	A	B	B	A	B	B	A	B	A
*synopGBS757	86.16	2D	TGCAGGCAAAACGACTTTCGCTTGAGGCATGTTGCCAAGCTGAGGCGTGTACTGACCTTGAGA	T/A	0	10426	-1	29	3	91	82	2	0.914439	A	B	B	B	B	B	B	A	A	B	A	A	A	B	A	B	B	A	B	B	B	A	A	A	B	A	B	A	B	B	A	B	B	A	B	A
*synopGBS216	86.96	2D	TGCAGATATCGAGTCAGCCTCCTACTCCAGCGGACGGCGAGGCAACATCAACGCCCTCCCCGA	C/T	0	2426	-1	34	2	85	81	4	0.86631	A	B	B	B	B	B	B	A	A	B	A	A	A	B	A	B	B	A	B	B	B	A	A	A	B	A	B	A	B	B	A	B	B	A	B	A
*synopGBS1288	87.74	2D	TGCAGTGCCTTCGGACTCATGCATCTATTTTAGAACTCTCCAAATATTTGGTCACAGATCATC	C/T	0	14935	-1	39	3	71	82	1	0.812834	A	B	B	B	B	B	B	A	A	B	A	A	A	B	A	B	B	A	B	B	B	A	A	A	B	A	B	A	B	B	A	B	B	A	B	A
*synopGBS1434	87.74	2D	TGCAGTTGCCGAGGGATAGGGACTGGAAGTTGGCCTGACTCTTTTGGATGACGACACGTACGC	T/C	0	16060	-1	16	2	84	88	4	0.898396	A	B	B	B	B	B	B	A	A	B	A	A	A	B	A	B	B	A	B	B	B	A	A	A	B	A	B	A	B	B	A	B	B	A	B	A
*synopGBS1436	87.74	2D	TGCAGTTGCCGAGGTACAGGGACTGGAAGTTGGCCTGACTCTTTTGGATGACGACACGTACGC	C/T	0	16062	-1	16	1	88	84	4	0.898396	A	B	B	B	B	B	B	A	A	B	A	A	A	B	A	B	B	A	B	B	B	A	A	A	B	A	B	A	B	B	A	B	B	A	B	A
*synopGBS1286	90.47	2D	TGCAGTGCCTCACTCCATACGACCCGTCTGGCCGTTTCACATCGTCGGATGAGAAAAACCCCT	C/T	0	14926	-1	58	3	78	80	2	0.834225	A	B	B	B	B	B	B	A	A	B	A	A	A	B	A	B	B	A	B	B	B	A	A	A	B	A	A	A	B	B	A	-	B	A	B	A
*synopGBS505	92.27	2D	TGCAGCGATGATCGCAACTAGGGTTTTGCCTGTGGGCGGCGACAGGTCACACGCGGCGTGTTG	C/T	0	6946	-1	12	3	80	74	2	0.812834	A	B	B	B	B	B	B	A	A	B	A	A	A	B	A	B	B	A	B	B	B	A	A	A	B	A	A	A	B	B	A	A	B	A	B	A
*synopGBS929	95.1	2D	TGCAGGTACCAGTCACATGATGCACGGGTGTCTCTGTGTCTGGTCCATAGCTAGGGGCGGGGG	C/G	0	12154	-1	8	3	79	75	1	0.818182	A	B	B	B	B	B	B	A	-	B	A	A	A	B	A	B	B	A	B	A	B	A	A	A	B	A	A	A	A	B	-	A	-	A	B	A
*synopGBS938	104.3	2D	TGCAGGTAGGCCTGTTACCCTGTGTGGTGAACTCAGGCAACTTATGACTGGGGTACGTATGTC	G/T	0	12224	-1	25	3	84	79	1	0.86631	A	B	B	B	B	-	B	A	-	A	A	A	A	B	A	B	B	A	B	A	B	A	A	A	B	B	-	A	A	A	-	A	-	A	B	A
*synopGBS939	104.3	2D	TGCAGGTAGGCCTGTTACCCTGTGTGGTGAACTCAGGCAACTTATGACTGGGGTACGTATGTC	A/T	0	12225	-1	43	3	84	79	1	0.86631	A	B	B	B	B	-	B	A	-	A	A	A	A	B	A	B	B	A	B	A	B	A	A	A	B	B	-	A	A	A	-	A	-	A	B	A
*synopGBS721	0	3A	TGCAGGAGCTATTGTACAGCCAACCGACCTCGTGTCGCGCCACCCTGGGGACCCGTCTGAGGA	A/G	0	10105	-1	62	1	73	81	3	0.807487	A	B	-	-	-	A	B	B	B	A	B	A	B	-	B	B	B	B	A	A	B	B	A	A	A	A	A	A	A	A	B	-	A	-	A	-
*synopGBS743	3.64	3A	TGCAGGATCTTGCGGGGAGGCGCTAGTGTCGCTGGTGGCGTAGTGTCAAGGTGGCGGCATCCA	T/C	0	10323	-1	28	2	95	87	8	0.930481	A	B	B	B	B	A	B	B	B	A	B	A	B	-	B	B	B	B	A	A	B	B	A	A	A	A	A	A	A	A	B	B	A	B	A	-
*synopGBS744	3.64	3A	TGCAGGATCTTGCGGTGAGGCGCTAGTGCCGCTGGCGGCGTAGTGTCAAGGTGGCGGCATCCA	C/T	0	10324	-1	28	2	89	93	8	0.930481	A	B	B	B	B	A	B	B	B	A	B	A	B	-	B	B	B	B	A	A	B	B	A	A	A	A	A	A	A	A	B	B	A	B	A	-
*synopGBS1079	4.4	3A	TGCAGTACGCATCACATGTTGCTGCTATGATCGTAGAAAAATGGAGGCGACAACACATAAGTG	C/T	0	13376	-1	14	3	80	74	4	0.802139	A	B	B	B	B	A	B	B	B	A	B	A	B	-	B	B	B	B	A	A	B	B	A	A	A	A	A	A	A	A	B	B	A	B	A	-
*synopGBS1080	4.4	3A	TGCAGTACGCATCACATGTTGCTGCTATGATCGTAGAAAAATGGAGGCGACAACACATAAGTG	A/G	0	13377	-1	34	3	80	74	4	0.802139	A	B	B	B	B	A	B	B	B	A	B	A	B	-	B	B	B	B	A	A	B	B	A	A	A	A	A	A	A	A	B	B	A	B	A	-
*synopGBS461	4.4	3A	TGCAGCCGCTACACAACCATCCCTCTGCGTCAAGCCATCGTCCATAATTTGCATCTCCCCACC	A/G	0	6169	-1	46	1	85	84	4	0.882353	A	B	B	B	B	A	B	B	B	A	B	A	B	-	B	B	B	B	A	A	B	B	A	A	A	A	A	A	A	A	B	B	A	B	A	B
*synopGBS1029	7.21	3A	TGCAGGTTTCAGTGATACGGTTTGGTCGCACCTTGGATCAAAGAAAGATGATATCTAAACCAC	C/T	0	13046	-1	17	3	101	66	6	0.860963	A	B	B	B	B	A	B	B	B	A	B	A	B	-	B	B	B	B	A	A	B	B	A	A	A	A	A	A	A	A	B	B	A	B	A	B
*synopGBS1030	7.21	3A	TGCAGGTTTCAGTGATACGGTTTGGTCGCACCTTGGATCAAAGAAAGATGATATCTAAACCAC	A/G	0	13047	-1	36	3	101	66	6	0.860963	A	B	B	B	B	A	B	B	B	A	B	A	B	-	B	B	B	B	A	A	B	B	A	A	A	A	A	A	A	A	B	B	A	B	A	B
*synopGBS288	7.21	3A	TGCAGATGGACATGGAGAATTAAGCAATGGAACAGTCGAGCGACGTGCTAGCTAGGCGCGAGG	A/G	0	3010	-1	5	3	102	61	5	0.84492	A	B	B	B	B	A	B	B	B	A	-	A	B	-	B	B	B	B	A	A	B	B	A	A	A	A	A	A	A	A	B	B	A	B	A	B
*synopGBS289	7.21	3A	TGCAGATGGACATGGAGAATTAAGCAATGGAACAGTCGAGCGACGTGCTAGCTAGGCGCGAGG	G/C	0	3011	-1	8	3	102	61	5	0.84492	A	B	B	B	B	A	B	B	B	A	-	A	B	-	B	B	B	B	A	A	B	B	A	A	A	A	A	A	A	A	B	B	A	B	A	B
*synopGBS1318	9.47	3A	TGCAGTGGGCGGGCATCGGCTTTGGCGACTGCGTAGCCTGCGGCGCCAGCGGCGGGCAGGGCC	C/T	0	15187	-1	52	2	89	76	11	0.823529	A	B	B	B	B	A	B	B	B	A	A	A	B	-	A	B	B	B	A	A	B	B	A	A	A	A	A	A	A	A	B	B	A	B	A	B
*synopGBS423	9.47	3A	TGCAGCCACTGCTCCGTCCTGCTGCTGTCGTCGACGCTGTTCCTCATCTCTAACCAGAGCACC	C/G	0	5375	-1	18	3	74	111	5	0.962567	A	B	B	B	B	A	B	B	B	A	A	A	B	-	A	B	B	B	A	A	B	B	A	A	A	A	A	A	A	A	B	B	A	B	A	B
*synopGBS629	9.47	3A	TGCAGCTTCACTGGGCTGACACACGAGCTCCTGGACCATCTCACCATCTATCACATGTCTAAA	A/C	0	9089	-1	60	3	64	101	7	0.84492	A	B	B	B	B	A	B	B	B	A	A	A	B	-	A	B	B	B	A	A	B	B	A	A	A	A	A	A	A	A	B	B	A	B	A	B
*synopGBS630	9.47	3A	TGCAGCTTCACTGGGCTGACACACGAGCTCCTGGACCATCTCACCATCTATCACATGTCTAAA	A/C	0	9090	-1	61	3	64	101	7	0.84492	A	B	B	B	B	A	B	B	B	A	A	A	B	-	A	B	B	B	A	A	B	B	A	A	A	A	A	A	A	A	B	B	A	B	A	B
*synopGBS542	12.62	3A	TGCAGCTAGCACTGGTGCGCCTTAACTAAAAAGCGGCCCGTGATCCATGGAGAGAGACGGCAG	A/G	0	7831	-1	27	3	61	95	2	0.823529	A	B	B	B	B	A	B	B	B	A	A	A	B	-	A	B	B	B	A	A	B	B	A	A	A	-	A	A	A	A	B	B	A	B	A	B
*synopGBS543	12.62	3A	TGCAGCTAGCACTGGTGCGCCTTAACTAAAAAGCGGCCCGTGATCCATGGAGAGAGACGGCAG	A/C	0	7832	-1	50	3	61	95	2	0.823529	A	B	B	B	B	A	B	B	B	A	A	A	B	-	A	B	B	B	A	A	B	B	A	A	A	-	A	A	A	A	B	B	A	B	A	B
*synopGBS580	12.62	3A	TGCAGCTCCGCGTCCAGTGGAGTGGAGGGCGTCGTTGCATGCGCCAGTGAGCTCGTGTCTCGT	C/T	0	8215	-1	10	3	94	76	9	0.860963	A	B	B	B	B	A	B	B	B	A	A	A	B	-	A	B	B	B	A	A	B	B	A	A	A	B	A	A	A	A	B	B	A	B	A	B
*synopGBS706	12.62	3A	TGCAGGACGTTCGGCACCAATGGCGCCTCTACCTCGACAGCGGCAAGCACGGCGCTCGTGCCC	A/G	0	9925	-1	36	3	100	67	7	0.855615	A	B	B	B	B	A	B	B	B	A	A	A	B	-	A	-	B	B	A	A	B	B	A	A	A	B	A	-	A	A	B	B	A	B	A	B
*synopGBS1260	19.24	3A	TGCAGTGATCCCTGAAGGGAAATCCGATGCCGCAGCAAATGCGAGGCACCCAACGGAGAAGAT	A/G	0	14736	-1	14	3	95	72	6	0.860963	A	B	A	B	B	A	B	B	B	A	A	A	B	-	A	A	B	B	A	B	B	B	A	A	A	B	A	B	A	A	B	B	A	B	A	B
*synopGBS1261	19.24	3A	TGCAGTGATCCCTGAAGGGAAATCCGATGCCGCAGCAAATGCGAGGCACCCAACGGAGAAGAT	A/G	0	14737	-1	21	3	95	72	6	0.860963	A	B	A	B	B	A	B	B	B	A	A	A	B	-	A	A	B	B	A	B	B	B	A	A	A	B	A	B	A	A	B	B	A	B	A	B
*synopGBS583	19.24	3A	TGCAGCTCCTAACTGCATTGTTAGGAATAATCTTGTAATCGATGCGTTTCGGTTGTATGCGTG	A/G	0	8230	-1	16	3	74	97	10	0.860963	A	B	A	B	B	A	B	B	B	A	A	A	B	-	A	A	B	B	A	B	B	B	A	A	A	B	A	B	A	A	B	B	A	B	A	B
*synopGBS1048	33.19	3A	TGCAGTAAACACAGGAATGAAGCTAGAATCGGCAAAACCACAATTTGCACGCTTTTGCTATGT	A/G	0	13125	-1	48	3	90	73	8	0.828877	A	B	A	B	B	A	B	B	B	A	A	A	B	-	A	B	B	B	B	B	B	B	A	B	A	B	A	B	A	A	B	B	A	-	A	B
*synopGBS1137	33.19	3A	TGCAGTATGGAGAGTTGGAGACCCACCCAGCGACGTGCGTTGCGTACATGACGCAGTCATGCA	C/T	0	13775	-1	51	1	96	67	9	0.823529	A	B	A	B	B	A	B	B	B	A	A	A	B	-	A	B	B	B	B	B	B	B	A	B	A	B	A	B	A	A	B	B	A	-	A	B
*synopGBS17	34.93	3A	TGCAGAAACTCTTGCCAGAGACCCTGCCACGGGCATGGGTGTTTCTGTTCCTCTTCTGCCTCA	C/T	0	159	-1	8	3	100	68	8	0.855615	A	B	A	B	B	A	B	B	B	A	A	A	B	-	A	B	B	B	B	B	B	B	A	B	A	B	A	B	A	A	B	B	A	-	A	B
*synopGBS793	34.93	3A	TGCAGGCATGACCACATGACCTTCCTGGCCTTGGCGTTCTTGGCGTGGGCGAGCGCAGACTCG	A/G	0	10678	-1	13	3	66	103	9	0.855615	A	B	A	B	B	A	B	B	B	A	A	A	B	-	A	B	B	B	B	B	B	B	A	B	A	B	A	B	A	A	B	B	A	-	A	B
*synopGBS1115	46.19	3A	TGCAGTAGGACCACGAGCATGGCCAGGGCTGCGAGCTTAGCATACGCCATTGCTAAGCCGAAG	A/G	0	13598	-1	41	1	72	95	8	0.850267	A	B	A	B	B	A	A	B	B	A	A	A	B	-	A	B	B	B	B	B	B	B	A	B	-	B	A	B	A	A	B	A	A	A	A	B
*synopGBS25	48.67	3A	TGCAGAAATGGGGCCTGTCCTTGCAGACGCATGTCACAGCAGCATTGCCGTCGTTCGTCACCT	C/G	0	290	-1	58	3	98	74	5	0.893048	A	B	A	B	B	A	A	B	B	A	A	A	B	-	A	B	B	B	B	B	A	B	A	B	B	B	A	B	A	A	-	A	A	A	A	B
*synopGBS26	48.67	3A	TGCAGAAATGGGGCCTGTCCTTGCAGACGCATGTCACAGCAGCATTGCCGTCGTTCGTCACCT	A/G	0	291	-1	59	3	98	74	5	0.893048	A	B	A	B	B	A	A	B	B	A	A	A	B	-	A	B	B	B	B	B	A	B	A	B	B	B	A	B	A	A	-	A	A	A	A	B
*synopGBS318	48.67	3A	TGCAGATTCTGTCGCAGGCAACATGATTAACACCACGGTGATTCTGCACAGCTAGTTAACACC	A/G	0	3247	-1	53	3	92	70	10	0.812834	A	B	A	B	B	A	A	B	B	A	A	A	B	-	A	B	B	B	B	B	A	B	A	B	B	B	A	B	A	A	-	A	A	A	A	B
*synopGBS862	48.67	3A	TGCAGGGAAAAACCAAGTTGCTGTCAATGGACCTTCACGTGCAGCCACTGTCTCAAACGGCAA	C/T	0	11455	-1	20	3	84	90	5	0.903743	A	B	A	B	B	A	A	B	B	A	A	A	B	-	A	B	B	B	B	B	A	B	A	B	B	B	A	B	A	A	-	A	A	A	A	B
*synopGBS863	48.67	3A	TGCAGGGAAAAACCAAGTTGCTGTCAATGGACCTTCACGTGCAGCCACTGTCTCAAACGGCAA	C/G	0	11456	-1	24	3	84	97	12	0.903743	A	B	A	B	B	A	A	B	B	A	A	A	B	-	A	B	B	B	B	B	A	B	A	B	B	B	A	B	A	A	-	A	A	A	A	B
*synopGBS68	53.47	3A	TGCAGAATCAGCAAAAGCATGTACGTCTTGTGCAGCCACGCATGCTGTCTCAATTGGTCGCCA	G/T	0	759	-1	59	3	67	87	4	0.802139	A	B	A	B	B	A	A	B	B	A	A	A	B	-	A	B	B	B	B	B	A	B	A	B	B	B	B	B	A	A	A	A	A	A	A	B
*synopGBS1095	57.93	3A	TGCAGTAGAAGGAAGATGCGTCCTCTTGCTAGGGTTTGGTTCCTCTTGCCATCGTCGATGGGG	A/G	0	13484	-1	50	3	82	76	7	0.807487	A	B	A	B	B	A	A	B	B	A	A	A	B	-	A	B	B	B	B	B	A	B	A	B	B	B	B	B	A	A	A	A	-	A	A	B
*synopGBS1246	57.93	3A	TGCAGTGACAATCCTACACCCGTCCAGAGCCATGGCTGACACTGTGCTTCTCCCTCCTGATTT	A/G	0	14646	-1	17	3	80	93	8	0.882353	A	B	A	B	B	A	A	B	B	A	A	A	B	-	A	B	B	B	B	B	A	B	A	B	B	B	B	B	A	A	A	A	-	A	A	B
*synopGBS1247	57.93	3A	TGCAGTGACAATCCTACACCCGTCCAGAGCCATGGCTGACACTGTGCTTCTCCCTCCTGATTT	G/C	0	14647	-1	26	3	80	93	8	0.882353	A	B	A	B	B	A	A	B	B	A	A	A	B	-	A	B	B	B	B	B	A	B	A	B	B	B	B	B	A	A	A	A	-	A	A	B
*synopGBS232	57.93	3A	TGCAGATCCGAACCGCAAGCTAAGGATGTGGTCGTTCGGTTCAGGGGAATGGTTGTGGATACC	G/C	0	2630	-1	54	3	97	86	14	0.903743	A	B	A	B	B	A	A	B	B	A	A	A	B	-	A	B	B	B	B	B	A	B	A	B	B	B	B	B	A	A	A	A	B	A	A	B
*synopGBS465	57.93	3A	TGCAGCCTATTCTCCAATCCCTTTCAACACCACAACACAAATCGTCTGGATGCGCAGGCGACA	A/G	0	6315	-1	34	3	73	88	8	0.818182	A	B	A	B	B	A	A	B	B	A	A	A	B	-	A	B	B	B	B	B	A	B	A	B	B	B	B	B	A	A	A	A	B	A	A	B
*synopGBS1023	59.75	3A	TGCAGGTTGGTGGTGTGGAGGAGGCAGTGACTGACCTGACGAAGGGGGCACAGGTTCGCAGAT	G/T	0	13005	-1	52	3	92	70	11	0.807487	A	B	A	B	B	A	A	B	B	A	A	A	B	-	A	B	B	B	B	B	A	B	A	B	B	B	B	B	A	A	A	A	B	A	A	B
*synopGBS1155	59.75	3A	TGCAGTCACGGCGCACGCGGGACCAATCCTGTTCATATTCCCCTCGCCCCTGCTGTCACCACT	C/T	0	13932	-1	42	3	81	83	8	0.834225	A	B	A	B	B	A	A	B	B	A	A	A	B	-	A	B	B	B	B	B	A	B	A	B	B	B	B	B	A	A	A	A	B	A	A	B
*synopGBS1462	60.62	3A	TGCAGTTTAACGCAATTCCGAGCGACACCGCCGCCTCGAACACGACAACCCGCGTCCTTCTGC	C/T	0	16284	-1	18	3	71	91	3	0.850267	A	B	A	B	B	A	A	B	B	A	A	A	B	-	A	B	B	B	B	B	A	B	A	B	B	B	B	B	A	A	A	A	B	A	A	B
*synopGBS165	62.33	3A	TGCAGACTAAGGGTGTGTTTGGTTTCTGTCATGAAACGAAACGGTACGGGTCGGTTCCGTCCC	C/T	0	1505	-1	36	3	73	89	7	0.828877	A	B	A	B	B	A	A	B	B	A	A	A	B	A	B	B	B	B	B	B	A	B	A	B	B	B	B	B	A	A	A	A	B	A	A	B
*synopGBS166	62.33	3A	TGCAGACTAAGGGTGTGTTTGGTTTCTGTCATGAAACGAAACGGTACGGGTCGGTTCCGTCCC	A/G	0	1506	-1	38	3	73	89	7	0.828877	A	B	A	B	B	A	A	B	B	A	A	A	B	A	B	B	B	B	B	B	A	B	A	B	B	B	B	B	A	A	A	A	B	A	A	B
*synopGBS167	62.33	3A	TGCAGACTAAGGGTGTGTTTGGTTTCTGTCATGAAACGAAACGGTACGGGTCGGTTCCGTCCC	G/A	0	1507	-1	42	3	73	89	7	0.828877	A	B	A	B	B	A	A	B	B	A	A	A	B	A	B	B	B	B	B	B	A	B	A	B	B	B	B	B	A	A	A	A	B	A	A	B
*synopGBS236	62.33	3A	TGCAGATCCTGGATCTTCTTTTACTAAGCAGGACGCAACTTACACAAATATGCAGGTCGTGCG	C/G	0	2663	-1	57	3	84	91	8	0.893048	A	B	A	B	B	A	A	B	B	A	A	A	B	A	B	B	B	B	B	B	A	B	A	B	B	B	B	B	A	A	A	A	B	A	A	B
*synopGBS60	62.33	3A	TGCAGAAGGGGAAGCAGCGAAATGGTCATATTGTGTGCTCCTTCATGCCAAAGACGCGACACA	A/C	0	669	-1	19	3	99	80	14	0.882353	A	B	A	B	B	A	A	B	B	A	A	A	B	A	B	B	B	B	B	B	A	B	A	B	B	B	B	B	A	A	A	A	B	A	A	B
*synopGBS1024	63.16	3A	TGCAGGTTGTGGTTGCATCGCAGCCGTCGGCGCATTCTCGGCCTGCATCGTCGTAGTCCGCTG	C/T	0	13027	-1	30	2	96	80	7	0.903743	A	B	A	B	B	A	A	B	B	A	A	A	B	A	B	B	B	B	B	B	A	B	A	B	B	B	B	B	A	A	A	A	B	A	A	B
*synopGBS1392	63.16	3A	TGCAGTTCCAGCGTCCTGCATCTGCACCTCCACCACAAGTCAGATTGCCGCACATTCAGTTCG	C/T	0	15755	-1	21	3	91	70	4	0.839572	A	B	A	B	B	A	A	B	B	A	A	A	B	A	B	B	B	B	B	B	A	B	A	B	B	B	B	B	A	A	A	A	B	A	A	B
*synopGBS771	63.16	3A	TGCAGGCACCTCTGGACCAGGAACGACACGGACCTGCCGAGCAGGTCGCTGAGGATCGCGGGC	C/T	0	10530	-1	6	2	79	90	12	0.839572	A	B	A	B	B	A	A	B	B	A	A	A	B	A	B	B	B	B	B	B	A	B	A	B	B	B	B	B	A	A	A	A	B	A	A	B
*synopGBS832	63.16	3A	TGCAGGCGTTTCAATGAGCCACACGCAAGGCGTCACTGATCACCAGCTCACTGCCATACTGAA	C/G	0	11259	-1	35	2	74	94	5	0.871658	A	B	A	B	B	A	A	B	B	A	A	A	B	A	B	B	B	B	B	B	A	B	A	B	B	B	B	B	A	A	A	A	B	A	A	B
*synopGBS1463	64.1	3A	TGCAGTTTAGAAGTCGACGCCGCAGACATATCTATGGCGTGCGTTTGTTAACAGTTCAAGCAA	C/T	0	16308	-1	17	3	89	76	13	0.812834	A	B	A	B	B	A	A	B	B	A	A	A	B	A	B	B	B	B	B	B	A	B	A	B	B	B	B	B	A	A	A	A	B	A	A	B
*synopGBS1464	64.1	3A	TGCAGTTTAGAAGTTGATGCCGCAGACATATCTCTGGCGTGCGTTTGTTAACAGTTCAAGCAA	C/T	0	16309	-1	41	1	76	83	8	0.807487	A	B	A	B	B	A	A	B	B	A	A	A	B	A	B	B	B	B	B	B	A	B	A	B	B	B	B	B	A	A	A	A	B	A	A	B
*synopGBS549	72.37	3A	TGCAGCTAGGCTCAAAACTCAGGCCCAAGCCTGGCCCACGGGCAAGCCCATCGGGCCTAGGCC	C/T	0	7890	-1	29	3	78	79	6	0.807487	A	B	A	B	B	A	A	B	B	A	A	A	B	A	B	B	B	A	B	B	A	B	A	B	B	B	B	B	A	A	A	A	B	-	A	A
*synopGBS109	83.4	3A	TGCAGACAGCGAGGCCATTGCACCAAGACTGCGGTACAGAATGGCAAGTGCCAAGAAAATTTG	A/G	0	1082	-1	39	3	76	89	14	0.807487	A	B	A	B	B	A	A	B	B	A	A	A	B	A	B	B	B	A	B	B	A	B	A	B	B	B	-	B	A	A	A	A	B	-	A	A
*synopGBS928	83.4	3A	TGCAGGTACATCATCAGTACCACTCTACTGGAGCACACATTGCTGCGTCTAGCCTTGTCTAAG	A/G	0	12151	-1	50	3	91	77	9	0.850267	A	B	A	B	B	A	A	B	B	A	A	A	B	A	B	B	B	A	B	B	A	B	A	B	B	B	A	B	A	A	A	A	B	-	A	A
*synopGBS481	84.27	3A	TGCAGCCTCTTCGTCCTGCTCCCCTCCTCGAGCCCTCGTCTGCGCCTTCGCCATGGGCCCGCG	A/G	0	6483	-1	30	2	90	94	15	0.903743	A	B	A	B	B	A	A	B	B	A	A	A	B	A	B	B	B	A	B	B	A	B	A	B	B	B	A	B	A	A	A	A	B	B	A	A
*synopGBS766	91.89	3A	TGCAGGCACACCCACTGCGTGCTCCACTTGGGCACCTTCTTCTGCACCACGTACATCTCCACC	C/T	0	10501	-1	14	3	95	67	5	0.839572	A	B	A	B	B	A	A	A	B	A	B	A	B	A	B	B	B	A	B	B	A	B	A	B	B	B	A	B	A	A	A	A	B	A	A	A
*synopGBS394	93.78	3A	TGCAGCATTAGTTCTTCTTCCACGGTCGATCAGAATCGCACACGAGCAACGTCCTTGATCAAG	A/G	0	5066	-1	57	2	72	87	5	0.823529	A	B	A	-	B	A	A	A	B	A	B	A	B	A	B	B	B	A	B	B	A	B	A	B	B	B	A	B	A	A	A	A	B	A	A	A
*synopGBS1316	100.87	3A	TGCAGTGGCTAGCTACCTGTCTTTACAAGATGGAGATTGCCTGATCGAAACCTACCCGACGGT	C/T	0	15158	-1	51	2	98	68	2	0.877005	A	B	A	-	B	A	A	A	B	A	B	A	B	A	B	B	B	A	B	B	A	B	A	B	B	A	A	B	A	A	A	A	B	A	A	A
*synopGBS633	100.87	3A	TGCAGCTTCCGCACGTGATCATGGATCGTTTCCTGTCCACCTTCCCGACACGCCTTGGCCCAG	A/C	0	9139	-1	47	3	89	83	7	0.882353	A	B	A	-	B	A	A	A	B	A	B	A	B	A	B	B	B	A	B	B	A	B	A	B	B	A	A	B	A	A	A	A	B	A	A	A
*synopGBS1221	117.52	3A	TGCAGTCTCCGCCTTGGGACAGCCCGAGACAAAGTGGGTGGCCGCCCCTCTGAATGCGCCGTC	C/T	0	14474	-1	41	1	63	95	8	0.802139	A	B	A	A	B	B	A	A	B	A	-	A	B	A	A	B	B	A	B	B	B	B	A	B	B	A	A	B	A	A	A	-	B	-	A	B
*synopGBS639	130.94	3A	TGCAGCTTCTCCTAGGCTTAATTTCACTGCGGCTTATGCACAAGCCACAGCTCAAAAGAACTG	A/G	0	9196	-1	13	3	74	82	6	0.802139	A	B	A	A	B	B	A	A	-	A	A	A	B	A	A	B	A	A	B	-	B	B	A	B	A	A	A	B	A	A	A	B	B	-	A	B
*synopGBS655	131.87	3A	TGCAGCTTTCTTTTTTTTCACGCAAGTTTAGAAGGAGGAAGACGACCTGGATCGGGGGCAATC	C/T	0	9393	-1	45	3	76	88	6	0.84492	A	B	A	A	B	B	A	A	-	A	A	A	B	A	A	B	A	A	B	-	B	B	A	B	A	A	A	B	A	A	A	B	B	B	A	B
*synopGBS895	131.87	3A	TGCAGGGCTGATACTGATAGTCTGCATGTTTTTGATCGACAAGAAACAGCACTGAAACTAATT	T/C	0	11801	-1	29	2	77	91	10	0.84492	A	B	A	A	B	B	A	A	-	A	A	A	B	A	A	B	A	A	B	A	B	B	A	B	A	A	A	B	A	A	A	B	B	B	A	B
*synopGBS974	131.87	3A	TGCAGGTCTGATACTGATAGTCTGCATGTCTTTGATCGACAAGAAACAGCACTGAAACTAATT	C/T	0	12514	-1	29	1	91	77	10	0.84492	A	B	A	A	B	B	A	A	-	A	A	A	B	A	A	B	A	A	B	A	B	B	A	B	A	A	A	B	A	A	A	B	B	B	A	B
*synopGBS142	135.41	3A	TGCAGACCTGTTCTTCTCGATCTGGGTCATATGGAAAGAAGGGTCGCGATCCGAAGAAAAAAG	A/T	0	1320	-1	39	3	84	80	2	0.86631	A	B	A	A	B	B	A	A	A	A	A	A	B	A	A	A	A	A	B	A	B	B	A	B	A	A	A	B	A	A	A	B	B	B	A	B
*synopGBS143	135.41	3A	TGCAGACCTGTTCTTCTCGATCTGGGTCATATGGAAAGAAGGGTCGCGATCCGAAGAAAAAAG	A/G	0	1321	-1	61	3	84	80	2	0.86631	A	B	A	A	B	B	A	A	A	A	A	A	B	A	A	A	A	A	B	A	B	B	A	B	A	A	A	B	A	A	A	B	B	B	A	B
*synopGBS1133	141.2	3A	TGCAGTATCTCAGACTCGATGGGCTTCACCCGCTCCAGAACCTTCGGCGTGCTCATAAATCAG	C/T	0	13745	-1	60	2	90	82	15	0.839572	A	B	A	A	B	B	A	A	A	A	A	A	B	A	A	A	A	A	B	A	B	B	A	B	A	A	A	B	A	-	A	B	B	B	A	B
*synopGBS557	141.2	3A	TGCAGCTAGTTGTCTTCAACCTCGAGCCAGGAACCAGGATCGTCTCCGAGAGCTGCCACTTGC	C/T	0	7940	-1	22	3	90	77	3	0.877005	A	B	A	A	B	B	A	A	A	A	A	A	B	A	A	A	A	A	B	A	B	B	A	B	A	A	A	B	A	B	A	B	B	B	A	B
*synopGBS640	141.2	3A	TGCAGCTTCTCCTCACCGCCGCCGTCGCGGTCGTCTTCGTCAGGGGCCGCGCCATACCCCACT	C/T	0	9197	-1	22	3	83	82	3	0.86631	A	B	A	A	B	B	A	A	A	A	A	A	B	A	A	A	A	A	B	A	B	B	A	B	A	A	A	B	A	B	A	B	B	B	A	B
*synopGBS668	141.2	3A	TGCAGGAAACTGTCTGGGATGCTGACATTGTGGTGAATGGGCTGTCGTCCACCAAGAAAAGGA	A/G	0	9491	-1	62	1	82	87	7	0.86631	A	B	A	A	B	B	A	A	A	A	A	A	B	A	A	A	A	A	B	A	B	B	A	B	A	A	A	B	A	B	A	B	B	B	A	B
*synopGBS359	142.06	3A	TGCAGCACGGGCAACAATTGTCCGAATCGTCCAAAGCATGGCCAAACAGACGACCCAGGGCTC	A/G	0	4149	-1	44	3	80	76	4	0.812834	A	B	A	A	B	B	A	A	A	A	A	A	B	A	A	A	A	A	B	A	B	B	A	B	A	A	A	B	A	B	A	B	B	B	A	B
*synopGBS144	152.89	3A	TGCAGACCTTAGGCCTTCCTTGCGAGCGATCCATTGGTCCCTTTGTATCTGAATGTTTGTACC	G/T	0	1323	-1	23	2	93	73	6	0.855615	A	B	A	A	A	A	A	A	A	A	A	A	A	A	A	A	A	A	B	A	B	B	A	A	A	A	A	B	A	B	A	B	B	B	A	B
*synopGBS145	152.89	3A	TGCAGACCTTAGGCCTTCCTTGCGAGCGATCCATTGGTCCCTTTGTATCTGAATGTTTGTACC	G/A	0	1324	-1	25	2	93	73	6	0.855615	A	B	A	A	A	A	A	A	A	A	A	A	A	A	A	A	A	A	B	A	B	B	A	A	A	A	A	B	A	B	A	B	B	B	A	B
*synopGBS450	153.73	3A	TGCAGCCCTCGCCGTACTTGAAACCTAATCCACACTTCATCTCGATGTTGCTTCTTACTCATG	A/G	0	5923	-1	31	3	70	92	4	0.84492	A	B	A	A	B	A	A	A	A	A	A	A	A	A	A	A	A	A	B	A	B	B	A	A	A	A	A	B	A	B	A	B	B	B	A	B
*synopGBS451	153.73	3A	TGCAGCCCTCGCCGTACTTGAAACCTAATCCACACTTCATCTCGATGTTGCTTCTTACTCATG	T/C	0	5924	-1	48	3	70	92	4	0.84492	A	B	A	A	B	A	A	A	A	A	A	A	A	A	A	A	A	A	B	A	B	B	A	A	A	A	A	B	A	B	A	B	B	B	A	B
*synopGBS1124	154.57	3A	TGCAGTAGGTCGGGGGACCATCCAATCAGATCTCCACTAAACGGACGGAACTAGCAGCAAGAG	G/C	0	13630	-1	13	2	82	75	4	0.818182	A	B	A	A	B	A	A	A	A	A	A	A	A	A	A	A	A	A	B	A	B	B	A	A	A	A	A	B	A	B	A	B	B	B	A	B
*synopGBS702	159.58	3A	TGCAGGACGCGACCATGGCCATGGCAGCCCAAGGACAGAAGCACGAGGTCCAGATCACGTTGC	C/T	0	9892	-1	7	3	89	91	8	0.919786	A	B	A	A	B	A	A	A	A	A	A	A	A	A	A	A	A	A	B	A	B	B	A	A	A	A	A	B	A	B	A	B	B	B	A	B
*synopGBS86	163.06	3A	TGCAGAATTATAAAAGGACTTCCAGCACAGGAAATCAACACGGTACAAATGCTAGGTCCTTCA	G/A	0	885	-1	41	3	82	75	4	0.818182	A	B	A	A	B	A	A	A	A	A	A	A	A	A	A	A	A	A	B	A	B	B	B	A	A	A	A	B	A	B	A	B	B	B	A	B
*synopGBS87	163.06	3A	TGCAGAATTATAAAAGGACTTCCAGCACAGGAAATCAACACGGTACAAATGCTAGGTCCTTCA	T/C	0	886	-1	52	3	82	75	4	0.818182	A	B	A	A	B	A	A	A	A	A	A	A	A	A	A	A	A	A	B	A	B	B	B	A	A	A	A	B	A	B	A	B	B	B	A	B
*synopGBS198	196.48	3A	TGCAGAGCTAGTACACTGGAAAGCAGGGGCATAGCTCAGCCATGCGCACAACTGCATTTCCTG	C/G	0	1949	-1	59	3	80	73	3	0.802139	A	B	A	A	A	A	A	B	A	B	A	B	A	A	A	A	-	A	B	A	B	A	B	A	A	A	A	B	A	B	A	B	B	B	A	B
*synopGBS607	197.42	3A	TGCAGCTGATGCAGGAGGGGGAGGGACGGGGGAGCGCTGCATCGAGCGCCTGCTTCTGCCGAG	C/T	0	8619	-1	48	3	78	75	3	0.802139	A	B	A	A	A	A	A	B	A	B	A	B	A	A	A	A	-	A	B	A	B	A	B	A	A	A	A	B	A	B	A	B	B	B	A	B
*synopGBS88	201.88	3A	TGCAGAATTGTCTTTGGAGACCCAGGCTGGCAGGGATTCAGTTCCTGGTAGTAATATATCCAG	C/T	0	921	-1	26	2	83	90	9	0.877005	A	B	A	A	A	A	A	B	A	B	A	B	A	A	A	A	B	A	B	A	B	A	B	A	A	A	A	B	A	B	A	B	A	B	A	B
*synopGBS1045	206.27	3A	TGCAGGTTTTTGAGCTCCAGTCTGTCCGTCGGGAACATGTCGGCGACCACGTCCATGACGGAC	C/T	0	13100	-1	52	1	78	93	3	0.898396	A	B	A	A	A	A	A	B	A	B	A	B	A	A	A	A	B	A	B	A	B	A	B	A	A	A	A	B	A	B	A	B	A	B	A	B
*synopGBS39	206.27	3A	TGCAGAACCAAAAAACAACAAGAACAAAGGAATGACACGAGAAAAAGAAGGAGCACTACTAGG	A/G	0	411	-1	25	3	65	89	3	0.807487	A	B	A	A	A	A	A	B	A	B	-	B	A	A	A	A	B	A	B	A	-	A	B	A	A	A	A	B	A	B	A	B	A	B	A	B
*synopGBS40	206.27	3A	TGCAGAACCAAAAAACAACAAGAACAAAGGAATGACACGAGAAAAAGAAGGAGCACTACTAGG	T/C	0	412	-1	32	3	68	86	3	0.807487	A	B	A	A	A	A	A	B	A	B	-	B	A	A	A	A	B	A	B	A	-	A	B	A	A	A	A	B	A	B	A	B	A	B	A	B
*synopGBS172	207.07	3A	TGCAGACTGAGCGGGCAGCTGAAGCCAAGGTTCCACTTGTTTCGGGGAACAACATTATCAAGC	A/G	0	1563	-1	34	2	87	85	4	0.898396	A	B	A	A	A	A	A	-	A	B	-	B	A	A	A	A	B	A	B	A	-	A	B	A	A	A	A	B	A	B	A	B	A	B	-	B
*synopGBS842	0	3B	TGCAGGCTCCCAGTGTGCTGGCGTAGCACATGAGGTCGTCCAGGCCGTTGGCGATATGGCCGA	C/G	0	11306	-1	40	3	89	76	8	0.839572	A	B	B	B	B	A	B	-	-	B	-	A	A	B	B	A	-	A	A	A	B	B	A	A	B	B	A	A	A	-	-	-	-	A	A	-
*synopGBS1139	0.9	3B	TGCAGTATGTAGATTACACGCACACATACATAGTCGAGACAACACGCCACGTTACACCCTATA	A/T	0	13787	-1	36	3	79	83	9	0.818182	A	B	B	B	B	A	B	A	-	B	A	A	A	B	B	A	A	A	A	A	B	B	A	A	B	B	A	A	A	A	A	A	B	A	A	A
*synopGBS1311	0.9	3B	TGCAGTGGACTCAGCAGCTGTGTTGTGGGGATGAGAGAAGAGGAGACTTTGCCTCTCTTCTTA	C/T	0	15078	-1	17	3	93	77	8	0.86631	A	B	B	B	B	A	B	A	A	B	A	A	A	B	B	A	A	A	A	A	B	B	A	A	B	B	A	A	A	A	A	A	B	A	A	A
*synopGBS1388	0.9	3B	TGCAGTTCATTTGAAAAAAGAAATTGATCAAGCATGGAATCTGATACTGATGCTCTTATTTGA	A/G	0	15732	-1	29	3	81	78	6	0.818182	A	B	B	B	B	A	B	A	A	B	A	A	A	B	B	A	A	A	A	A	B	B	A	A	B	B	A	A	A	A	A	A	B	A	A	A
*synopGBS1470	0.9	3B	TGCAGTTTCTCTTAATCGTCGAGCGAAACTGCTCCGCTGGGAATTGAAGGCAAGCAATTACTC	C/T	0	16427	-1	19	3	79	92	8	0.871658	A	B	B	B	B	A	B	A	A	B	A	A	A	B	B	A	A	A	A	A	B	B	A	A	B	B	A	A	A	A	A	A	B	A	A	A
*synopGBS1471	0.9	3B	TGCAGTTTCTCTTAATCGTCGAGCGAAACTGCTCCGCTGGGAATTGAAGGCAAGCAATTACTC	A/G	0	16428	-1	27	3	79	92	8	0.871658	A	B	B	B	B	A	B	A	A	B	A	A	A	B	B	A	A	A	A	A	B	B	A	A	B	B	A	A	A	A	A	A	B	A	A	A
*synopGBS275	0.9	3B	TGCAGATGAGGCCATGGACGCAGGCACTGGTCATCCGTTAGGGAGCGGTTGATTTCTTATCGT	A/G	0	2890	-1	5	3	79	79	6	0.812834	A	B	B	B	B	A	B	A	A	B	A	A	A	B	B	A	A	A	A	A	B	B	A	A	B	B	A	A	A	A	A	A	B	A	A	A
*synopGBS276	0.9	3B	TGCAGATGAGGCCATGGACGCAGGCACTGGTCATCCGTTAGGGAGCGGTTGATTTCTTATCGT	T/C	0	2891	-1	37	3	79	79	6	0.812834	A	B	B	B	B	A	B	A	A	B	A	A	A	B	B	A	A	A	A	A	B	B	A	A	B	B	A	A	A	A	A	A	B	A	A	A
*synopGBS804	0.9	3B	TGCAGGCCATTCAAGGGCGAATAGGATTTTGTCATTGTGGCATGCTCCTCCAACCCTCTTCTT	A/G	0	10800	-1	19	3	78	79	4	0.818182	A	B	B	B	B	A	B	A	A	B	A	A	A	B	B	A	A	A	A	A	B	B	A	A	B	B	A	A	A	A	A	A	B	A	A	A
*synopGBS805	0.9	3B	TGCAGGCCATTCAAGGGCGAATAGGATTTTGTCATTGTGGCATGCTCCTCCAACCCTCTTCTT	G/T	0	10801	-1	30	3	78	79	4	0.818182	A	B	B	B	B	A	B	A	A	B	A	A	A	B	B	A	A	A	A	A	B	B	A	A	B	B	A	A	A	A	A	A	B	A	A	A
*synopGBS806	0.9	3B	TGCAGGCCATTCAAGGGCGAATAGGATTTTGTCATTGTGGCATGCTCCTCCAACCCTCTTCTT	T/G	0	10802	-1	63	3	78	79	4	0.818182	A	B	B	B	B	A	B	A	A	B	A	A	A	B	B	A	A	A	A	A	B	B	A	A	B	B	A	A	A	A	A	A	B	A	A	A
*synopGBS1216	6.26	3B	TGCAGTCTATTTCACACTTCCATTCTATCTTCAGTTCTTCCAGAGCAGGTGCCCAACTCAGTA	A/G	0	14457	-1	13	2	85	83	5	0.871658	A	B	B	B	B	A	B	A	A	B	A	A	A	B	B	A	A	A	B	A	B	B	A	A	B	B	A	A	A	A	A	A	B	A	A	A
*synopGBS1217	6.26	3B	TGCAGTCTATTTCACACTTCCATTCTATCTTCAGTTCTTCCAGAGCAGGTGCCCAACTCAGTA	G/C	0	14458	-1	33	2	85	83	5	0.871658	A	B	B	B	B	A	B	A	A	B	A	A	A	B	B	A	A	A	B	A	B	B	A	A	B	B	A	A	A	A	A	A	B	A	A	A
*synopGBS506	8.61	3B	TGCAGCGCAAGATTGACGACGCCAAGCAATGGCATGCTACAGGAGCGGTAATGATGCAACACA	A/G	0	6976	-1	53	3	78	87	4	0.860963	A	B	B	B	B	A	B	A	A	B	A	A	A	B	B	A	A	A	B	A	B	B	A	A	B	B	A	A	B	A	A	A	B	A	A	A
*synopGBS732	8.61	3B	TGCAGGATACTTTCCTCATTATCCCAACTGGCTGCGATTCGGGAGTCTGAGTTCCAGGCGTTC	C/G	0	10254	-1	16	3	93	82	5	0.909091	A	B	B	B	B	A	B	A	A	B	A	A	A	B	B	A	A	A	B	A	B	B	A	A	B	B	A	A	B	A	A	A	B	A	A	A
*synopGBS1243	12.12	3B	TGCAGTGAACTTGGAAACCAGTTCATCCATGTTCGGCAGGCACTCCTTAGCACGCTCGTCGCC	A/T	0	14618	-1	8	2	86	73	3	0.834225	A	B	B	B	B	A	B	A	A	B	A	A	A	B	B	A	A	A	B	A	B	B	A	A	B	B	A	A	B	A	A	A	B	A	A	A
*synopGBS1244	12.12	3B	TGCAGTGAACTTGGAAACCAGTTCATCCATGTTCGGCAGGCACTCCTTAGCACGCTCGTCGCC	A/C	0	14619	-1	14	2	86	73	3	0.834225	A	B	B	B	B	A	B	A	A	B	A	A	A	B	B	A	A	A	B	A	B	B	A	A	B	B	A	A	B	A	A	A	B	A	A	A
*synopGBS1415	12.12	3B	TGCAGTTGACTTTCTACTCCAAACCCATCTCCCATGTTTTGCTAGACGTACAGAAGATTACAG	A/T	0	15982	-1	26	2	88	75	9	0.823529	A	B	B	B	B	A	B	A	A	B	A	A	A	B	B	A	A	A	B	A	B	B	A	A	B	B	A	A	B	A	A	A	B	-	A	A
*synopGBS845	12.12	3B	TGCAGGCTGACCGCACCCTGGCGGACTACAACATTCAGAGCGAGGATACCCTTTATTTGGGTC	C/T	0	11348	-1	62	3	86	79	6	0.850267	A	B	B	B	B	A	B	A	A	B	A	A	A	B	B	A	A	A	B	A	B	B	A	A	B	B	A	A	B	A	A	A	B	-	A	A
*synopGBS624	18.15	3B	TGCAGCTTACACGGTCGAGGGCGGGCTGGCGCGCACTGCGCATCGATCGATCTCCTCATCCGC	C/G	0	9029	-1	47	3	73	98	6	0.882353	A	B	B	B	B	A	B	A	A	B	A	A	A	B	B	A	A	A	B	A	B	B	A	A	B	B	A	A	B	A	A	A	B	-	A	A
*synopGBS625	18.15	3B	TGCAGCTTACACGGTCGAGGGCGGGCTGGCGCGCACTGCGCATCGATCGATCTCCTCATCCGC	C/A	0	9030	-1	53	3	73	98	6	0.882353	A	B	B	B	B	A	B	A	A	B	A	A	A	B	B	A	A	A	B	A	B	B	A	A	B	B	A	A	B	A	A	A	B	-	A	A
*synopGBS204	25.03	3B	TGCAGAGTCCCTTGGCAAGGCGAGGCCGTTTCAGGGCCTAAACGGCAGGGCGTTGGAGGTGGA	C/T	0	2204	-1	26	3	96	78	3	0.914439	A	B	B	B	B	A	B	A	A	B	A	A	A	B	B	A	A	A	A	B	B	B	A	A	B	B	A	A	B	A	A	A	B	B	A	A
*synopGBS755	39.7	3B	TGCAGGATTTTTGGCAGCATGCATGCGCTGGGTTGCCATGATTTTCTGATCATTTGCATGGCA	C/T	0	10423	-1	56	2	91	74	13	0.812834	A	B	B	B	B	A	B	A	A	B	A	A	A	B	B	A	B	B	A	B	B	B	A	A	A	B	A	A	B	A	A	A	B	B	A	A
*synopGBS1484	40.6	3B	TGCAGTTTTCAAAATTTTGACAGTCAATCAGCCGTTGATTTTTCTCTTAACTCTGCCGAACAA	A/G	0	16555	-1	29	3	88	65	3	0.802139	A	B	B	B	B	A	B	A	A	B	A	A	A	B	B	A	B	B	A	B	B	B	A	A	A	B	A	A	B	A	A	A	B	B	A	A
*synopGBS1485	40.6	3B	TGCAGTTTTCAAAATTTTGACAGTCAATCAGCCGTTGATTTTTCTCTTAACTCTGCCGAACAA	T/A	0	16556	-1	35	3	88	65	3	0.802139	A	B	B	B	B	A	B	A	A	B	A	A	A	B	B	A	B	B	A	B	B	B	A	A	A	B	A	A	B	A	A	A	B	B	A	A
*synopGBS353	40.6	3B	TGCAGCACATGCAACAATTGTCCGAATCCCCCAAAACATGGCCAAACAGACAACCCAGTGTTC	A/C	0	3981	-1	32	3	93	80	6	0.893048	A	B	B	B	B	A	B	A	A	B	A	A	A	B	B	A	B	B	A	B	B	B	A	A	A	B	A	A	B	A	A	A	B	B	A	A
*synopGBS787	40.6	3B	TGCAGGCAGTCGATTTTTCTACGGTTTGACCACAGGTCATGGGCGGCTGGGCGTATGTTCAAC	G/T	0	10649	-1	52	3	85	71	3	0.818182	A	B	B	B	B	A	-	A	A	B	A	A	A	B	B	A	B	B	A	B	B	B	A	A	A	B	A	A	B	A	A	A	B	B	A	A
*synopGBS512	51.78	3B	TGCAGCGCTAGTCCTAGCTGGAAACATAGAGAGGGAGGAGCGCTGACCAGAGAAGACAGCTTC	A/G	0	7220	-1	25	3	87	70	4	0.818182	A	B	B	B	B	A	-	A	A	B	A	B	A	B	B	A	B	B	A	B	B	A	A	A	A	B	A	A	B	A	A	A	B	B	A	A
*synopGBS1134	59.56	3B	TGCAGTATGCACATCCATGCATTTCTATTCTAGTGCCACTTAACTGCTCAAATGAACCATTAG	T/C	0	13765	-1	30	3	89	83	9	0.871658	A	B	A	A	B	A	A	A	B	B	B	B	A	B	B	A	B	B	A	-	B	A	A	A	A	B	A	B	B	A	A	A	B	B	A	A
*synopGBS1135	59.56	3B	TGCAGTATGCACATCCATGCATTTCTATTCTAGTGCCACTTAACTGCTCAAATGAACCATTAG	T/C	0	13766	-1	44	3	89	83	9	0.871658	A	B	A	A	B	A	A	A	B	B	B	B	A	B	B	A	B	B	A	-	B	A	A	A	A	B	A	B	B	A	A	A	B	B	A	A
*synopGBS1225	59.56	3B	TGCAGTCTGCACATCCATGCATTTCTATTCCAGTGCCACTTAACCGCTCAAATGAACCATTAG	C/T	0	14510	-1	30	2	83	88	9	0.86631	A	B	A	A	B	A	A	A	B	B	B	B	A	B	B	A	B	B	A	-	B	A	A	A	A	B	A	B	B	A	A	A	B	B	A	A
*synopGBS1226	59.56	3B	TGCAGTCTGCACATCCATGCATTTCTATTCCAGTGCCACTTAACCGCTCAAATGAACCATTAG	C/T	0	14511	-1	44	2	83	88	9	0.86631	A	B	A	A	B	A	A	A	B	B	B	B	A	B	B	A	B	B	A	-	B	A	A	A	A	B	A	B	B	A	A	A	B	B	A	A
*synopGBS1410	63.63	3B	TGCAGTTCTCCATGACGGCGTTCCAGCAAAACTCCATAGCGGTTGCAGCCAAAAACAGCGCCG	C/T	0	15908	-1	9	3	93	81	6	0.898396	A	B	A	A	B	B	A	A	B	B	B	B	A	B	B	A	B	B	A	A	B	A	A	A	A	B	A	B	B	A	A	A	B	B	A	A
*synopGBS488	63.63	3B	TGCAGCCTGCTACCATGTCGTTTCTTGCTGGACATACCTTCCAACGGTGACGGGGATGACTGC	G/T	0	6530	-1	19	3	83	82	7	0.84492	A	B	A	A	B	B	A	A	B	B	B	B	A	B	B	A	B	B	A	A	B	A	A	A	A	B	A	B	B	A	A	A	B	B	A	A
*synopGBS558	63.63	3B	TGCAGCTATAGCCGCCTGCACCAGTGGATTTGCAAGGACCTCCTCCAAGGGCCCCTCATTCGC	A/C	0	7943	-1	33	3	92	86	4	0.930481	A	B	A	A	B	B	A	A	B	B	B	B	A	B	B	A	B	B	A	A	B	A	A	A	A	B	A	B	B	A	A	A	B	B	A	A
*synopGBS559	63.63	3B	TGCAGCTATAGCCGCCTGCACCAGTGGATTTGCAAGGACCTCCTCCAAGGGCCCCTCATTCGC	A/G	0	7944	-1	46	3	92	89	7	0.930481	A	B	A	A	B	B	A	A	B	B	B	B	A	B	B	A	B	B	A	A	B	A	A	A	A	B	A	B	B	A	A	A	B	B	A	A
*synopGBS438	70.57	3B	TGCAGCCCATGCATCCATGGGGTCCGTCCATAGCCTTGCGAAGGCCACCACAAAGCTAGGAGG	T/C	0	5709	-1	56	3	78	81	7	0.812834	A	B	A	A	B	B	A	A	B	B	B	B	A	B	B	A	B	B	A	A	B	A	A	A	A	B	B	B	B	A	A	A	B	B	A	A
*synopGBS439	70.57	3B	TGCAGCCCATGCATCCATGGTGTCCGTCCATAGCCTTGCGAAGGCCACCACAAAGCCAGGAGG	C/T	0	5710	-1	56	1	81	78	7	0.812834	A	B	A	A	B	B	A	A	B	B	B	B	A	B	B	A	B	B	A	A	B	A	A	A	A	B	B	B	B	A	A	A	B	B	A	A
*synopGBS253	71.53	3B	TGCAGATCGGGGGGGAGGAGGAGATGTTTGAAAGATACTACGTCCTAGCAGTGAGGGGAGAGC	C/T	0	2734	-1	7	3	84	81	10	0.828877	A	B	A	A	B	B	A	A	B	B	B	B	A	B	B	A	B	B	A	A	B	A	A	A	A	B	B	B	B	A	A	A	B	B	A	A
*synopGBS1372	77.07	3B	TGCAGTTATGGAAACCGCTTAGCAAGCAACATGCTCAAGACGACATCGACCAGATCACCGTGG	A/G	0	15605	-1	27	3	76	82	5	0.818182	A	B	A	A	-	B	A	A	B	B	B	B	A	B	B	A	B	B	A	A	B	A	A	A	A	B	B	B	B	A	A	A	B	B	A	A
*synopGBS1373	77.07	3B	TGCAGTTATGGAAACCGCTTAGCAAGCAACATGCTCAAGACGACATCGACCAGATCACCGTGG	A/G	0	15606	-1	36	3	76	82	5	0.818182	A	B	A	A	-	B	A	A	B	B	B	B	A	B	B	A	B	B	A	A	B	A	A	A	A	B	B	B	B	A	A	A	B	B	A	A
*synopGBS1374	77.07	3B	TGCAGTTATGGAAACCGCTTAGCAAGCAACATGCTCAAGACGACATCGACCAGATCACCGTGG	T/C	0	15607	-1	45	3	76	82	5	0.818182	A	B	A	A	-	B	A	A	B	B	B	B	A	B	B	A	B	B	A	A	B	A	A	A	A	B	B	B	B	A	A	A	B	B	A	A
*synopGBS1227	78.85	3B	TGCAGTCTGCATGACCATGACAACTACTTGGTGAACTCGAGAGCCCAGAAGTTACCGAAGATG	A/G	0	14512	-1	19	3	87	92	7	0.919786	A	B	A	A	A	B	A	A	B	B	B	B	A	B	B	A	B	B	A	A	B	A	A	A	A	B	B	B	B	A	A	A	B	B	A	A
*synopGBS295	78.85	3B	TGCAGATGGGGCAGCTGCCCAGGATAAGGTGCCAGAAGCCGAGGTCAATGGGAAGGGCGGGCA	A/T	0	3053	-1	52	2	84	82	6	0.855615	A	B	A	A	A	B	A	A	B	B	B	B	A	B	B	A	B	B	A	A	B	A	A	A	A	B	B	B	B	A	A	A	B	B	A	A
*synopGBS537	78.85	3B	TGCAGCTACTCAAACTTTCGTCGACACTATGGAAGAGGATCGTGGGCGTCATAGCCACCTAGC	A/C	0	7795	-1	28	3	79	81	4	0.834225	A	B	A	-	A	B	A	A	B	B	B	B	A	B	B	A	B	B	A	A	B	A	A	A	A	B	B	B	B	A	A	A	B	B	A	A
*synopGBS1050	82.27	3B	TGCAGTAACCTTGATTCATGCCAGCTTCAGAGAACGTAATCTGAAAGGTCGTTTCAACAGATC	C/T	0	13170	-1	9	1	83	86	5	0.877005	A	B	A	-	A	B	A	A	B	B	B	B	A	B	B	A	B	B	A	A	B	A	A	A	A	B	B	B	B	A	A	A	A	B	A	A
*synopGBS1091	82.27	3B	TGCAGTAGAACGCCACTTGGCAGTTGGTGGTCATGCAAATGCAGGCAACGCAATGGACCTGCT	C/G	0	13475	-1	35	3	90	89	3	0.941176	A	B	A	B	A	B	A	A	B	B	B	B	A	B	B	A	B	B	A	A	B	A	A	A	A	B	B	B	B	A	A	A	A	B	A	A
*synopGBS484	82.27	3B	TGCAGCCTGAATTCTGGGCATTAGAGGAGGCACTGAAGCTTCGTCCTTATCTGAGTTCCTGGA	C/T	0	6489	-1	63	3	81	78	3	0.834225	A	B	A	B	A	B	A	A	B	B	B	B	A	B	B	A	B	B	A	A	B	A	A	A	A	B	B	B	B	A	A	A	A	B	A	A
*synopGBS1116	82.98	3B	TGCAGTAGGACTCTTTGGCCCAATACCCTCGGATACGCTTGGCAAGCTTGATGCCCTGGAGGC	A/C	0	13599	-1	22	3	93	89	5	0.946524	A	B	A	B	A	B	A	A	B	B	B	B	A	B	B	A	B	B	A	A	B	A	A	A	A	B	B	B	B	A	A	A	A	B	A	A
*synopGBS1250	84.46	3B	TGCAGTGACTGCCTCCGTGTGCAGGTAGTGTCTGAGAGCGGGGATGGCGACGCACTTCGTGCT	A/G	0	14680	-1	22	3	81	84	1	0.877005	A	B	A	B	A	B	A	A	B	B	B	B	A	B	B	A	B	B	A	A	B	A	A	A	A	B	B	B	B	A	A	A	A	B	A	A
*synopGBS409	86.17	3B	TGCAGCCAACCCTGCGCCAGCCTGCCATGCCCAGCTGCGCCCCGCTTTCTTGCCTTTGTCTCC	A/G	0	5160	-1	7	3	88	64	2	0.802139	A	B	A	B	A	B	A	A	B	B	B	B	A	B	B	A	B	B	A	A	B	A	A	A	A	B	B	B	B	A	A	A	A	B	A	A
*synopGBS410	86.17	3B	TGCAGCCAACCCTGCGCCAGCCTGCCATGCCCAGCTGCGCCCCGCTTTCTTGCCTTTGTCTCC	C/G	0	5161	-1	39	3	88	64	2	0.802139	A	B	A	B	A	B	A	A	B	B	B	B	A	B	B	A	B	B	A	A	B	A	A	A	A	B	B	B	B	A	A	A	A	B	A	A
*synopGBS411	86.17	3B	TGCAGCCAACCCTGCGCCAGCCTGCCATGCCCAGCTGCGCCCCGCTTTCTTGCCTTTGTCTCC	T/C	0	5162	-1	56	3	88	64	2	0.802139	A	B	A	B	A	B	A	A	B	B	B	B	A	B	B	A	B	B	A	A	B	A	A	A	A	B	B	B	B	A	A	A	A	B	A	A
*synopGBS652	88.06	3B	TGCAGCTTTCCATCTACGGATGCCGTTCATCTTCCACCGACTGTTTCCAAGATTCCGTCAGAG	A/G	0	9378	-1	28	3	68	87	1	0.823529	A	B	A	B	A	B	A	A	B	B	B	B	A	B	B	A	B	B	A	A	B	A	A	A	A	B	B	B	B	A	A	A	A	B	A	A
*synopGBS663	90.91	3B	TGCAGGAAAACACATGTCAAATCCCAAAACTTTTGCACAAATATACTGCTTGTAACGGACCGT	C/T	0	9461	-1	60	3	73	80	2	0.807487	A	B	A	B	A	B	A	A	B	B	B	B	A	B	B	A	B	B	A	A	B	A	A	A	A	B	B	B	B	A	A	A	A	B	A	A
*synopGBS1478	92.62	3B	TGCAGTTTGGGGCGATGACCTAATAATCCTAGCTTAGGTACAAGCACTTCACTCCCTCCCTTG	A/C	0	16498	-1	41	3	84	91	5	0.909091	A	B	A	B	A	B	A	A	B	B	B	B	B	B	B	A	B	B	A	A	B	A	A	A	A	B	B	B	B	A	A	A	A	B	A	A
*synopGBS696	92.62	3B	TGCAGGACATATTGGTGCTGCGAGAGCGCCTCCTCTAGTATTGGCAATGAGTTCTGCATCGAG	A/G	0	9800	-1	8	3	78	85	2	0.860963	A	B	A	B	A	B	A	A	B	B	B	B	B	B	B	A	B	B	A	A	B	A	A	A	A	B	B	B	B	A	A	A	A	B	A	A
*synopGBS697	92.62	3B	TGCAGGACATATTGGTGCTGCGAGAGCGCCTCCTCTAGTATTGGCAATGAGTTCTGCATCGAG	T/C	0	9801	-1	11	3	78	85	2	0.860963	A	B	A	B	A	B	A	A	B	B	B	B	B	B	B	A	B	B	A	A	B	A	A	A	A	B	B	B	B	A	A	A	A	B	A	A
*synopGBS831	94.25	3B	TGCAGGCGTTCTCAGCATTTCGGCATATGGGCCTCTACACTCCAGCCAGCCTGCGATGTGTCA	A/G	0	11255	-1	13	3	84	86	6	0.877005	A	B	A	B	A	B	A	A	B	B	A	B	B	B	B	A	B	B	A	A	B	A	A	A	A	B	B	B	B	A	A	A	A	B	A	A
*synopGBS247	95.93	3B	TGCAGATCGATCACCAAAAGGCCCGTAGAATCGCCAACGCCGCAAACGAACATACGGCGAAAT	G/T	0	2705	-1	58	3	90	76	6	0.855615	A	B	A	B	A	B	A	A	B	B	A	B	B	B	B	A	B	B	A	A	B	A	A	A	A	B	B	B	B	A	A	A	A	B	A	A
*synopGBS1224	99.5	3B	TGCAGTCTCTGGCGGCCGCGCTCGATGACGGCGAGGAGCCCATCACCGACAGGACCCTGACGC	C/T	0	14495	-1	28	3	82	74	2	0.823529	A	B	A	B	A	B	A	A	B	B	A	B	B	B	B	A	B	B	A	A	B	A	A	A	A	-	B	B	B	A	A	A	A	B	A	A
*synopGBS843	99.5	3B	TGCAGGCTCCTTTGTGCAGCGACCAGCAGCGAGTGTTGGCGCACGACCGCGAGGGGATGCTGG	A/G	0	11317	-1	27	3	78	79	5	0.812834	A	B	A	B	A	B	A	A	B	B	A	B	B	B	B	A	B	B	A	A	B	A	A	A	A	-	B	B	B	A	A	A	A	B	A	A
*synopGBS1270	100.35	3B	TGCAGTGCACAGGCGCCACGGGCTAACCACTACGCCACAGGGCAGCTCACGTTCCTATACAGG	A/G	0	14799	-1	56	1	78	77	3	0.812834	A	B	A	B	A	B	A	A	B	B	A	B	B	B	B	A	B	B	A	A	B	A	A	A	A	-	B	B	B	A	A	A	A	B	A	A
*synopGBS1278	100.35	3B	TGCAGTGCATTTGCTATGGTATGGTCTTCTACGGGGCATCGCTATGTCTCGCATTCAACTAGT	A/T	0	14874	-1	60	3	84	72	1	0.828877	A	B	A	B	A	B	A	A	B	B	A	B	B	B	B	A	B	B	A	A	B	A	A	A	A	-	B	B	B	A	A	A	A	B	A	A
*synopGBS1279	100.35	3B	TGCAGTGCATTTGCTATGGTATGGTCTTCTACGGGGCATCGCTATGTCTCGCATTCAACTAGT	G/T	0	14875	-1	61	3	84	72	1	0.828877	A	B	A	B	A	B	A	A	B	B	A	B	B	B	B	A	B	B	A	A	B	A	A	A	A	-	B	B	B	A	A	A	A	B	A	A
*synopGBS1280	100.35	3B	TGCAGTGCATTTGCTATGGTATGGTCTTCTACGGGGCATCGCTATGTCTCGCATTCAACTAGT	C/T	0	14876	-1	63	3	84	72	1	0.828877	A	B	A	B	A	B	A	A	B	B	A	B	B	B	B	A	B	B	A	A	B	A	A	A	A	-	B	B	B	A	A	A	A	B	A	A
*synopGBS315	100.35	3B	TGCAGATTCGCAAGCATGCAACTAGGCTTGGTGTGGAAGCTGGATTTGAGGGACATTTCTGGC	A/G	0	3229	-1	20	3	77	75	2	0.802139	A	B	A	B	A	B	A	A	B	B	A	B	B	B	B	A	B	B	A	A	B	A	A	A	A	-	B	B	B	A	A	A	A	B	A	A
*synopGBS344	100.35	3B	TGCAGCAAGTAAATCACATGCACTCCTCTTACCCAGTGTTGTCGAGTCACCCGACATCTCCTC	C/T	0	3747	-1	49	3	74	82	3	0.818182	A	B	A	B	A	B	A	A	B	B	A	B	B	B	B	A	B	B	A	A	B	A	A	A	A	-	B	B	B	A	A	A	A	B	A	A
*synopGBS1166	101.22	3B	TGCAGTCATCGTCGGCATCTGACACCTATGCTGCCGTGGTTCGCGCACTCGACGCGGCGCACA	A/G	0	14009	-1	16	3	82	72	1	0.818182	A	B	A	B	A	B	A	A	B	B	A	B	B	B	B	A	B	B	A	A	B	A	A	A	A	-	B	B	B	A	A	A	A	B	A	A
*synopGBS1312	102.05	3B	TGCAGTGGAGACCTCGAACCGTAGGTAGCAGTCGAAGCCCATCACCGCGGCCGCCAAGCCACC	A/C	0	15084	-1	56	1	74	83	3	0.823529	A	B	A	B	A	B	A	A	B	B	A	B	B	B	B	A	B	B	A	A	B	A	A	A	A	-	B	B	B	A	A	A	A	B	A	A
*synopGBS1418	102.05	3B	TGCAGTTGAGGAAGACAGGGGCGTCGGGGCTTGCGTCGTACCTGACTGTGTGGAGGAACAACG	A/G	0	15993	-1	16	3	78	77	2	0.818182	A	B	A	B	A	B	A	A	B	B	A	B	B	B	B	A	B	B	A	A	B	A	A	A	A	-	B	B	B	A	A	A	A	B	A	A
*synopGBS427	102.05	3B	TGCAGCCAGAAGCTGGACGCTCGCTCTGACTGCTTTCTACCAACCGTTGAGTCAATCCGATCC	A/C	0	5395	-1	16	3	79	81	4	0.834225	A	B	A	B	A	B	A	A	B	B	A	B	B	B	B	A	B	B	A	A	B	A	A	A	A	-	B	B	B	A	A	A	A	B	A	A
*synopGBS62	102.05	3B	TGCAGAAGTAACCGAATGCTCGGAACGGCCATTCTTTTTCCTTGACAAGGAGCGTGGACAGCC	A/G	0	676	-1	24	3	91	86	8	0.903743	A	B	A	B	A	B	A	A	B	B	A	B	B	B	B	A	B	B	A	A	B	A	A	A	A	-	B	B	B	A	A	A	A	B	A	A
*synopGBS906	102.83	3B	TGCAGGGGGTCTAGGGCGCATCTAGGCTTAGTCGTCCCCGTCCTCGTTGGTGAGGTCGACGTA	G/A	0	11934	-1	45	3	93	80	3	0.909091	A	B	A	B	A	B	A	A	B	B	A	B	B	B	B	A	B	B	A	A	B	A	A	A	A	-	B	B	B	A	A	A	A	B	A	A
*synopGBS909	102.83	3B	TGCAGGGTGTCTAGGGCGCATCTAGGCTTAGTCGTCCCCGTCCTCATTGGTGAGGGCGACGTA	A/G	0	12056	-1	45	2	80	92	3	0.903743	A	B	A	B	A	B	A	A	B	B	A	B	B	B	B	A	B	B	A	A	B	A	A	A	A	-	B	B	B	A	A	A	A	B	A	A
*synopGBS753	103.6	3B	TGCAGGATTGATCGGAATTGCTTGATTGATTGATCGATCGCCAGCGTATTTGTAGGGAGAATA	A/C	0	10401	-1	24	2	78	92	6	0.877005	A	B	A	B	A	B	A	A	B	B	A	B	B	B	B	A	A	B	A	A	B	A	A	A	A	-	B	B	B	A	A	A	A	B	A	A
*synopGBS1241	105.18	3B	TGCAGTGAACGCCACGGTTGCTATTAGGACAGCAGCAATGATAAATGTTTGTGATGCATCCTT	A/G	0	14611	-1	40	3	84	80	3	0.860963	A	B	A	B	A	B	A	A	B	B	A	B	B	B	B	A	A	B	A	A	B	A	A	A	A	-	B	B	B	A	A	A	A	B	A	A
*synopGBS1242	105.18	3B	TGCAGTGAACGCCACGGTTGCTATTAGGACAGCAGCAATGATAAATGTTTGTGATGCATCCTT	C/T	0	14612	-1	60	3	84	80	3	0.860963	A	B	A	B	A	B	A	A	B	B	A	B	B	B	B	A	A	B	A	A	B	A	A	A	A	-	B	B	B	A	A	A	A	B	A	A
*synopGBS158	105.18	3B	TGCAGACGGCCTTTCACCCCTGTACCTGGCCATCTTGCTAGACAAAAGCACCATTGCACTTGC	A/G	0	1444	-1	39	3	89	87	5	0.914439	A	B	A	B	A	B	A	A	B	B	A	B	B	B	B	A	A	B	A	A	B	A	A	A	A	-	B	B	B	A	A	A	A	B	A	A
*synopGBS720	105.18	3B	TGCAGGAGATGCGACATGGCGAACCAACGTCTGGAGTGATTGGCTCTGTAAGTACTCACTCTG	A/G	0	10032	-1	25	3	80	85	4	0.860963	A	B	A	B	A	B	A	A	B	B	A	B	B	B	B	A	A	B	A	A	B	A	A	A	A	-	B	B	B	A	A	A	A	B	A	A
*synopGBS824	105.18	3B	TGCAGGCGATGGCGGCTACGCGAGCTGATCTTAGTCAGGCTCTTGGCGCATGTCGCCCCCACT	C/T	0	11027	-1	18	3	74	85	4	0.828877	A	B	A	B	A	B	A	A	B	B	A	B	B	B	B	A	A	B	A	A	B	A	A	A	A	-	B	B	B	A	A	A	A	B	A	A
*synopGBS502	105.97	3B	TGCAGCGAAGGCGCCACAGGGCAGCTCAGGAGCGCTGGGAACACCGTGTCAGCTCGGCACACG	C/G	0	6733	-1	54	1	77	99	8	0.898396	A	B	A	B	A	B	A	A	B	B	A	B	B	B	B	A	A	B	A	A	B	A	A	A	A	-	B	B	B	A	A	A	A	B	A	A
*synopGBS243	107.71	3B	TGCAGATCGAGCTGCGGCGGGCGATTGCTTGCTCGACGTCAGTTAATTGATTGCATGCGAATC	C/T	0	2696	-1	36	3	92	82	13	0.860963	A	B	A	B	A	B	A	A	B	B	A	B	B	B	B	A	A	B	A	A	B	A	A	A	A	-	B	B	B	A	A	A	A	B	A	A
*synopGBS244	107.71	3B	TGCAGATCGAGCTGCGGCGGGCGATTGCTTGCTCGACGTCAGTTAATTGATTGCATGCGAATC	A/G	0	2697	-1	49	3	92	82	13	0.860963	A	B	A	B	A	B	A	A	B	B	A	B	B	B	B	A	A	B	A	A	B	A	A	A	A	-	B	B	B	A	A	A	A	B	A	A
*synopGBS1420	108.64	3B	TGCAGTTGATGAAGATGTGTGGCGCTGCCAAACAACCAATCCAAGGCGCCTGATGCTCTCTGG	C/T	0	16005	-1	48	2	93	84	13	0.877005	A	B	A	B	A	B	A	A	B	B	A	B	B	B	B	A	A	B	A	A	B	A	A	A	A	-	B	B	B	A	A	A	A	B	A	A
*synopGBS740	108.64	3B	TGCAGGATCCGAGGATGCTATGCAGACGAAGTGGTCATGCGTAATATGACCTTCCATGGAGAC	A/G	0	10301	-1	42	3	80	74	3	0.807487	A	B	A	B	A	B	A	A	B	B	A	B	B	B	B	A	A	B	A	A	B	A	A	A	A	-	B	B	B	A	A	A	A	B	A	A
*synopGBS741	108.64	3B	TGCAGGATCCGAGGATGCTATGCAGACGAAGTGGTCATGCGTAATATGACCTTCCATGGAGAC	G/A	0	10302	-1	57	3	80	74	3	0.807487	A	B	A	B	A	B	A	A	B	B	A	B	B	B	B	A	A	B	A	A	B	A	A	A	A	-	B	B	B	A	A	A	A	B	A	A
*synopGBS220	111.52	3B	TGCAGATCAACCAGGCTCTGTATACCAATTGTTGGCGCCGCCTCTCGCAGCGCTGCTCTTCTT	C/G	0	2488	-1	50	3	84	74	4	0.823529	A	B	A	B	A	B	A	A	B	B	A	B	B	B	B	A	A	B	A	A	B	A	B	A	A	-	B	B	B	A	A	A	A	B	A	A
*synopGBS21	114.97	3B	TGCAGAAAGGAAACACGGGGGATGCCCACTGTGGGCACGGGCTGGGCGGACAGCCTTGACGCT	G/A	0	197	-1	48	3	82	91	5	0.898396	A	B	A	B	A	B	A	A	B	A	A	B	B	B	B	A	A	B	A	A	B	A	B	A	A	-	B	B	B	A	A	A	A	B	A	A
*synopGBS462	118.42	3B	TGCAGCCGTCCAAAGCGTAGCTGCCGTCAACCCCGCTTGTCTCATTGTACTGCCCTCCCACAC	C/T	0	6210	-1	62	3	92	70	4	0.84492	A	B	A	B	A	B	A	A	B	A	A	B	B	B	B	A	A	B	A	A	B	A	B	A	A	-	B	B	B	A	A	A	A	B	A	A
*synopGBS956	118.42	3B	TGCAGGTCATGTAACTACCAATTCCCTCGGAAAACGTTTACTTGCAGAGGACTTTTCAGATAG	A/G	0	12353	-1	31	3	96	60	2	0.823529	A	B	A	B	A	B	A	A	B	A	A	B	B	B	B	A	A	B	A	A	-	A	-	A	A	-	B	B	B	A	A	A	A	B	A	A
*synopGBS957	118.42	3B	TGCAGGTCATGTAACTACCAATTCCCTCGGAAAACGTTTACTTGCAGAGGACTTTTCAGATAG	G/T	0	12354	-1	58	3	96	60	2	0.823529	A	B	A	B	A	B	A	A	B	A	A	B	B	B	B	A	A	B	A	A	-	A	-	A	A	-	B	B	B	A	A	A	A	B	A	A
*synopGBS116	133.36	3B	TGCAGACATTACTGCTGGGGGAATCCAGCTCCGAGATGGTCCGTTACCTCGGTGCTCTGGTTC	T/A	0	1135	-1	52	2	85	68	3	0.802139	A	B	A	B	A	B	A	A	B	A	A	B	B	B	B	A	A	B	A	A	A	-	A	A	B	-	B	B	B	A	A	A	A	B	A	A
*synopGBS117	133.36	3B	TGCAGACATTACTGCTGGTGGAATCCAGCTCCGAGATGGTCCGTTACCTCGGAGCTCTGGTTC	A/T	0	1136	-1	52	1	68	85	3	0.802139	A	B	A	B	A	B	A	A	B	A	A	B	B	B	B	A	A	B	A	A	A	-	A	A	B	-	B	B	B	A	A	A	A	B	A	A
*synopGBS1284	133.36	3B	TGCAGTGCCGCGTGACCGCAAAGTATGGCCGTCTCCCAGTCTACGAGGACGTAGTTTTGAAGA	C/T	0	14920	-1	18	3	79	79	4	0.823529	A	B	A	B	A	B	A	A	B	A	A	B	B	B	B	A	A	B	A	A	A	-	A	A	B	-	B	B	B	A	A	A	A	B	A	A
*synopGBS360	133.36	3B	TGCAGCACGGGTTCAACACGCTGCCTCGGAGCCAGTACGGCGATGACACTGGCCTATATTGCA	C/T	0	4155	-1	18	3	87	82	3	0.887701	A	B	A	B	A	B	A	A	B	A	A	B	B	B	B	A	A	B	A	A	A	B	A	A	B	-	B	B	B	A	A	A	A	B	A	A
*synopGBS1257	134.83	3B	TGCAGTGAGCTCGCCAGCAAAGAACGCATCTCCCTCGACCATGCTGGGCATGCGCATCACTGG	C/A	0	14705	-1	52	3	92	89	7	0.930481	A	B	A	B	A	B	A	A	B	A	A	B	B	B	B	A	A	B	A	A	A	B	A	A	B	-	B	B	B	A	A	A	A	B	A	A
*synopGBS1258	134.83	3B	TGCAGTGAGCTCGCCAGCAAAGAACGCATCTCCCTCGACCATGCTGTGCATGAGCATCACTGG	A/C	0	14706	-1	52	1	89	91	6	0.930481	A	B	A	B	A	B	A	A	B	A	A	B	B	B	B	A	A	B	A	A	A	B	A	A	B	-	B	B	B	A	A	A	A	B	A	A
*synopGBS454	136.44	3B	TGCAGCCCTTTCCATGGTGTAGCCCGTGACGTTCAGGACTTCAAGTAGATGTGATGGATTTGT	A/G	0	5966	-1	20	3	81	74	2	0.818182	A	B	A	B	A	B	A	A	B	A	A	B	B	B	B	A	A	B	A	A	A	B	A	A	B	-	B	B	B	A	A	A	A	B	A	A
*synopGBS604	143.41	3B	TGCAGCTCTGCTTCTACCTAGCAGACCCTTACTTGTCCTCCATCGCTCACGCGGTCGGGGATG	C/T	0	8500	-1	51	3	86	86	6	0.887701	A	B	A	B	A	B	A	A	B	A	A	B	B	B	B	A	A	B	A	A	A	B	A	A	B	-	B	B	B	A	A	A	A	B	A	A
*synopGBS1266	151.54	3B	TGCAGTGCACAAATGGCCATATCACATGCTTAAAGTGCTGCGCCGATCTGAAGCACAGTAGTT	A/G	0	14790	-1	8	2	80	75	3	0.812834	A	B	A	B	A	B	A	A	B	A	A	-	B	B	B	B	A	B	A	A	A	B	A	A	B	-	B	B	B	A	A	A	B	B	A	A
*synopGBS1267	151.54	3B	TGCAGTGCACAAATGGCCATATCACATGCTTAAAGTGCTGCGCCGATCTGAAGCACAGTAGTT	T/C	0	14791	-1	19	2	80	75	3	0.812834	A	B	A	B	A	B	A	A	B	A	A	-	B	B	B	B	A	B	A	A	A	B	A	A	B	-	B	B	B	A	A	A	B	B	A	A
*synopGBS569	154.17	3B	TGCAGCTCAACTCCAACCTTCTTGGCCTCGACGTAAGTGACAAGAGCATCCTCAAACATCGAC	A/G	0	8036	-1	41	1	84	95	8	0.914439	A	B	A	B	A	B	A	A	B	A	A	A	B	B	B	B	A	B	A	A	A	B	B	A	B	-	B	B	B	A	A	A	B	B	A	A
*synopGBS526	154.9	3B	TGCAGCTAAGCGACTTTGTACCGCGGAACAAAACTGCAAAGTGGTGTTGTACGAACCTGGGCT	C/T	0	7704	-1	61	1	90	90	6	0.930481	A	B	A	B	A	B	A	A	B	A	A	A	B	B	B	B	A	B	A	A	A	B	B	A	B	-	B	B	B	A	A	A	B	B	A	A
*synopGBS535	155.64	3B	TGCAGCTACGCAGTGCTCATGGACGACTCCGACTTCACCTTCCAAGCGAGCTACGCGACCTTG	A/C	0	7772	-1	11	3	89	82	6	0.882353	A	B	A	B	A	B	A	A	B	A	A	A	B	B	B	B	A	B	A	A	A	B	B	A	B	-	B	B	B	A	A	A	B	B	A	A
*synopGBS1105	161.73	3B	TGCAGTAGCAATCGCGCGCCGTTGTTCACCATCATGGACGATTAGTATGAGCAGCGGCTGGAG	A/G	0	13528	-1	10	3	73	92	4	0.860963	A	B	A	B	A	B	A	A	B	A	A	A	B	B	B	B	A	B	A	A	A	B	B	A	B	-	B	B	B	A	A	A	B	B	A	A
*synopGBS1253	161.73	3B	TGCAGTGAGAGGAGAAACGCCTGAAGCAAGGGGAACATACATCTCGCTTCAAGAGAGATATAG	A/C	0	14690	-1	53	1	79	89	6	0.86631	A	B	A	B	A	B	A	A	B	A	A	A	B	B	B	B	A	B	A	A	A	B	B	A	B	-	B	B	B	A	A	A	B	B	A	A
*synopGBS92	161.73	3B	TGCAGACAAAGCACCGAAACGGCTCTGTCACCATCAGCTTCGGTAACGTCTAAAGCAGGGAAG	C/T	0	958	-1	24	3	94	79	5	0.898396	A	B	-	-	-	-	-	-	B	A	A	A	B	B	B	B	A	B	A	A	A	B	B	A	B	-	B	B	B	A	-	A	B	B	A	A
*synopGBS1192	0	3D	TGCAGTCGAGCGATCTCAACTTACAGGAGTATGCAGCTGCTGCTATACTCACTCTCTCAGCCT	A/G	0	14279	-1	34	3	73	80	2	0.807487	A	B	B	A	B	A	-	-	B	-	-	-	A	A	A	B	A	-	B	-	A	-	A	A	A	A	A	A	-	-	B	B	B	B	-	-
*synopGBS1193	0	3D	TGCAGTCGAGCGATCTCAACTTACAGGAGTATGCAGCTGCTGCTATACTCACTCTCTCAGCCT	A/C	0	14280	-1	46	3	73	87	9	0.807487	A	B	B	A	B	A	-	-	B	-	-	-	A	A	A	B	A	-	B	-	A	-	A	A	A	A	A	A	-	-	B	B	B	B	-	-
*synopGBS943	0	3D	TGCAGGTATCATTTTGATGGCAGAGAAGAAACACCTTCCGCACTTCGGATCCTTCGCAGCTAG	A/T	0	12272	-1	10	3	68	88	6	0.802139	A	B	B	A	B	-	B	A	B	B	B	-	A	A	A	B	A	-	B	B	A	B	A	A	A	A	A	A	-	-	B	B	B	B	B	B
*synopGBS944	0	3D	TGCAGGTATCATTTTGATGGCAGAGAAGAAACACCTTCCGCACTTCGGATCCTTCGCAGCTAG	C/T	0	12273	-1	45	3	68	88	6	0.802139	A	B	B	A	B	-	B	A	B	B	B	-	A	A	A	B	A	-	B	B	A	B	A	A	A	A	A	A	-	-	B	B	B	B	B	B
*synopGBS945	0	3D	TGCAGGTATCATTTTGATGGCAGAGAAGAAACACCTTCCGCACTTCGGATCCTTCGCAGCTAG	G/T	0	12274	-1	58	3	68	88	6	0.802139	A	B	B	A	B	-	B	A	B	B	B	-	A	A	A	B	A	-	B	B	A	B	A	A	A	A	A	A	-	-	B	B	B	B	B	B
*synopGBS155	5.72	3D	TGCAGACGGAACTGCACACGCGAAGCAAGAGGAGAACACAGCTTGTCAACTCATCCACAACAC	A/T	0	1431	-1	17	3	89	78	5	0.86631	A	B	A	A	B	B	B	A	B	B	B	A	A	A	A	B	A	A	B	B	A	B	A	A	A	A	A	A	A	B	B	B	B	B	B	B
*synopGBS202	5.72	3D	TGCAGAGGGAGGAGCGTGGTCCTGCTGCGTGTTGTGGCGGAAAGAGGGCGTGTCGATCGTCCG	C/G	0	2115	-1	27	3	85	75	2	0.84492	A	B	A	A	B	B	B	A	B	B	B	A	A	A	A	B	A	A	B	B	A	B	A	A	A	A	A	A	A	B	B	B	B	B	B	B
*synopGBS479	5.72	3D	TGCAGCCTCTGATCTCTCCGCCGCCGTCGTCTCCATCAACCAACGACAGCTATAGTCACGTGC	C/T	0	6473	-1	62	3	77	79	4	0.812834	A	B	A	A	B	B	B	A	B	B	B	A	A	A	A	B	A	A	-	B	A	B	A	A	A	A	A	A	A	B	B	B	B	B	B	B
*synopGBS31	14.59	3D	TGCAGAACAAATGTGTCCCACCAGCACGCATGCTCGTGCCCATGTCTACTCCCCGCAGGATAC	C/G	0	332	-1	52	3	86	81	5	0.86631	A	B	A	A	B	B	B	A	B	B	B	A	A	A	A	A	A	A	A	B	A	B	A	A	A	A	A	A	A	B	A	B	B	B	B	B
*synopGBS1488	19.87	3D	TGCAGTTTTGTCATGCTACACTTCTAATACTTGCCCATTCAGAGATGGGGAAGAAATTACCTT	G/A	0	16621	-1	32	3	78	92	4	0.887701	A	B	A	A	B	B	-	A	B	B	B	A	A	A	A	A	A	A	A	B	A	B	A	A	A	A	A	A	B	B	A	B	B	B	B	B
*synopGBS817	21.54	3D	TGCAGGCCTCCTAAACTAGGGTGTTAACTTGAGAATAAACAACTTGCGTATTTATAGCCATCT	G/T	0	10946	-1	22	3	75	87	6	0.834225	A	B	A	A	B	B	-	A	B	B	B	A	A	A	A	A	A	A	A	B	A	B	A	A	A	A	A	A	B	B	A	B	B	B	B	B
*synopGBS795	25.7	3D	TGCAGGCATTGGGGCATGCCAGGTACGCCAAGCGAAAACGTGGCCCCACCACACGCTGTCGGC	A/G	0	10703	-1	47	3	89	88	5	0.919786	A	B	A	A	B	B	A	A	B	B	B	A	-	A	A	A	B	A	A	B	A	B	A	A	A	A	A	B	B	B	A	B	B	B	B	B
*synopGBS106	36.66	3D	TGCAGACACCTTTGGGAATCCATTCAACATTAATTTTCAGTCACAGAGACAGCAAAACAGATG	A/C	0	1034	-1	7	3	74	87	6	0.828877	A	B	A	A	-	B	A	A	B	A	B	A	-	A	A	A	B	A	A	B	-	A	A	A	A	A	A	B	B	-	A	B	B	A	B	B
*synopGBS1468	49.6	3D	TGCAGTTTCCAGCTTCCAAACAGTCAAACAGAGGAACTGCAATGCAGGCACAAGAGCTACAAT	C/T	0	16379	-1	59	3	90	82	4	0.898396	A	B	A	-	A	B	A	B	B	A	B	A	-	A	B	A	B	A	A	B	B	A	B	A	A	A	A	B	B	-	A	B	B	A	B	B
*synopGBS645	49.6	3D	TGCAGCTTGATCTGCTGCCGATCGCAGTTTTTTGCAGGCGCGCAGTAGCCAGCTCTCAGCTTC	G/T	0	9256	-1	8	3	78	84	7	0.828877	A	B	A	B	A	B	A	B	B	A	B	A	B	A	B	A	B	A	A	B	B	A	B	A	A	A	A	B	B	A	A	B	B	A	B	B
*synopGBS803	49.6	3D	TGCAGGCCATGTTTGCATGTACTACATCAGTGAGTGCCATATGTAGTACCTGTCTGAATTGAA	C/G	0	10798	-1	36	3	82	76	4	0.823529	A	B	A	B	A	B	A	B	B	A	B	A	B	A	B	A	B	A	A	B	B	A	B	A	A	A	A	B	B	A	A	B	B	A	B	B
*synopGBS1147	51.21	3D	TGCAGTCAAGGTGCACGTCATATTGTATATACATTGATCCGCTAGAGCAGATTGGAGAATGAT	C/G	0	13875	-1	18	3	78	77	4	0.807487	A	B	A	B	A	B	A	B	B	A	B	A	B	A	B	A	B	A	A	B	B	A	B	A	A	A	A	B	A	A	A	B	B	A	B	B
*synopGBS1245	51.21	3D	TGCAGTGAATTCCATTCCTCGCATTGGCAAGACCTGCATCGTTCACATGCACTCCATGCTCGT	C/T	0	14638	-1	39	3	83	80	2	0.860963	A	B	A	B	A	B	A	B	B	A	B	A	B	A	B	A	B	A	A	B	B	A	B	A	A	A	A	B	A	A	A	B	B	A	B	B
*synopGBS237	51.21	3D	TGCAGATCGAAGAAGAAGAGGCCATCATGGTACGGTGTCCCGCTCGCACCCACCATCACCACC	A/G	0	2678	-1	16	2	90	91	7	0.930481	A	B	A	B	A	B	A	B	B	A	B	A	B	A	B	A	B	A	A	B	B	A	B	A	A	A	A	B	A	A	A	B	B	A	B	B
*synopGBS1379	52.11	3D	TGCAGTTCACGCATTGTTTCTCTGCAAGACCAACATGGAGCAATGGCGTGCAACAACCTTTGC	C/G	0	15684	-1	9	3	76	81	6	0.807487	A	B	A	B	A	B	A	B	B	A	-	A	B	A	B	A	B	A	A	B	B	A	B	A	A	A	A	B	A	A	A	B	B	A	B	B
*synopGBS1459	58.73	3D	TGCAGTTGTTGATGAATTGAGAGGCGGCCCTGTGCCAGCCATGAAGATAGCAGTTCTAGATGG	G/A	0	16256	-1	31	3	83	81	5	0.850267	A	B	A	B	A	B	A	B	-	A	A	A	B	A	B	A	B	A	A	B	B	A	B	A	-	A	A	B	A	A	A	B	B	A	B	B
*synopGBS1460	58.73	3D	TGCAGTTGTTGATGAATTGAGAGTCGGCCCTATGCCAGCCATGAAGATAGCAGTTCTAGATGG	A/G	0	16257	-1	31	1	81	83	5	0.850267	A	B	A	B	A	B	A	B	-	A	A	A	B	A	B	A	B	A	A	B	B	A	B	A	-	A	A	B	A	A	A	B	B	A	B	B
*synopGBS340	65.1	3D	TGCAGCAACTTAACGCAGTTACGTGTGAATAGCGTGGAGTCGGGCGATGGTGCGTGGGCAGCA	A/C	0	3648	-1	30	3	90	67	2	0.828877	A	B	A	B	A	B	A	B	A	A	A	A	B	A	B	A	B	A	A	B	B	A	B	A	B	A	A	B	A	A	A	B	B	A	B	A
*synopGBS678	65.1	3D	TGCAGGAACTTCATTCCTTTGGTTTTTCCTGCAAGCCGAACGGGCCCTCAGCTTGCGGTTGAT	A/T	0	9605	-1	33	2	79	79	3	0.828877	A	B	A	B	A	B	A	B	A	A	A	A	B	A	B	A	B	A	A	B	B	A	B	A	B	A	A	B	A	A	A	B	B	A	B	A
*synopGBS769	65.1	3D	TGCAGGCACATGTCTCGCCAATGTGAAAAGCGAGACGGTCCCTGGTCCAAGTACCTGAACAAG	A/T	0	10518	-1	34	3	84	73	2	0.828877	A	B	A	B	A	B	A	B	A	A	A	A	B	A	B	A	B	A	A	B	B	A	B	A	B	A	A	B	A	A	A	B	B	A	B	A
*synopGBS1296	65.96	3D	TGCAGTGCGGATGAATTCCACATCAACCAAAACAAACTTCATACTGAGGGAGGAGAGAGCTGC	A/G	0	14968	-1	46	3	83	80	4	0.850267	A	B	A	B	A	B	A	B	A	A	A	A	B	A	B	A	B	A	A	B	B	A	B	A	B	A	A	B	A	A	A	B	B	A	B	A
*synopGBS50	71.95	3D	TGCAGAAGAGCTCGCCTCCTCCCTGACCAAAGAAACGAGGCGACCGCTCGGGCGACGCGGCGT	G/T	0	566	-1	63	2	90	76	7	0.850267	A	B	A	B	-	B	A	B	A	A	A	A	B	A	B	A	B	A	A	B	B	A	B	A	B	A	A	B	A	A	A	B	B	A	B	A
*synopGBS51	71.95	3D	TGCAGAAGAGCTCGCCTCCTCCCTGACCAAAGAAACGAGGCGACCGCTCGGGCGACGCGGTGC	T/G	0	567	-1	63	2	76	90	7	0.850267	A	B	A	B	-	B	A	B	A	A	A	A	B	A	B	A	B	A	A	B	B	A	B	A	B	A	A	B	A	A	A	B	B	A	B	A
*synopGBS963	71.95	3D	TGCAGGTCCTCCTCACCGATCAGAACCCTTACACGCTTGCCAGGATCAAGATCGCCAGACTTG	A/G	0	12416	-1	24	3	76	85	5	0.834225	A	B	A	B	B	B	A	B	A	A	A	A	B	A	B	A	B	A	A	B	B	A	B	A	B	A	A	B	A	A	A	B	B	A	B	A
*synopGBS1365	78.68	3D	TGCAGTTATAATCTTCCATGGAATCCCAGCAAGTTTAGAGTGTGCCGTCGATTCAAGGGAGAT	C/T	0	15574	-1	15	3	81	95	5	0.914439	A	B	-	B	B	B	-	B	A	B	A	A	B	A	B	A	B	A	A	B	B	A	B	A	B	A	A	B	A	A	A	B	B	A	B	A
*synopGBS416	86.95	3D	TGCAGCCACGACTCCTTCTACCACAACAACTGCATTTCCTAGTTTTAGCTTGCCAGCTCCTGC	C/T	0	5334	-1	56	3	69	88	5	0.812834	A	B	B	B	-	B	B	B	A	B	A	B	B	A	B	A	B	A	A	B	B	A	B	A	B	A	A	B	A	A	A	B	B	A	B	A
*synopGBS338	98	3D	TGCAGCAAATGGCAACCGTCCTCTCCTATACTTGGGGCACTTGGCCACACGCCCACGCAGGCT	C/G	0	3539	-1	51	3	86	75	5	0.834225	A	B	B	B	A	B	B	B	A	B	A	B	B	A	B	A	B	A	B	B	B	A	B	A	B	A	A	B	A	A	A	B	B	A	B	A
*synopGBS395	101.51	3D	TGCAGCATTCTCGATCCGTTGCCAAATGTTTGCGACATTGCTGGATTAAACTCGTGACATGGA	A/T	0	5078	-1	34	3	74	89	2	0.860963	A	B	A	B	A	B	B	-	A	B	A	B	B	A	B	A	B	A	B	B	B	A	B	A	B	B	-	B	A	A	A	B	B	A	B	A
*synopGBS1109	105.9	3D	TGCAGTAGCCTGTCCAGGAGGGGAAACTCCCCCATGATATTAGCTTTATCGCCGATAGAGCAC	G/A	0	13554	-1	57	3	76	82	2	0.834225	A	B	A	B	A	B	B	A	B	B	A	B	B	A	B	A	B	A	B	B	B	A	B	A	B	B	B	A	A	A	A	B	B	A	B	A
*synopGBS1110	105.9	3D	TGCAGTAGCCTGTCCAGGAGGGGAAACTCCCCCATGATATTAGCTTTATCGCCGATAGAGCAC	A/G	0	13555	-1	58	3	76	82	2	0.834225	A	B	A	B	A	B	B	A	B	B	A	B	B	A	B	A	B	A	B	B	B	A	B	A	B	B	B	A	A	A	A	B	B	A	B	A
*synopGBS1111	105.9	3D	TGCAGTAGCCTGTCCAGGAGTGGAAACTCCCCCATGATATTAGCTTTATCGCCGATAAGGCAC	A/G	0	13556	-1	57	2	82	76	2	0.834225	A	B	A	B	A	B	B	A	B	B	A	B	B	A	B	A	B	A	B	B	B	A	B	A	B	B	B	A	A	A	A	B	B	A	B	A
*synopGBS1112	105.9	3D	TGCAGTAGCCTGTCCAGGAGTGGAAACTCCCCCATGATATTAGCTTTATCGCCGATAAGGCAC	G/A	0	13557	-1	58	2	82	76	2	0.834225	A	B	A	B	A	B	B	A	B	B	A	B	B	A	B	A	B	A	B	B	B	A	B	A	B	B	B	A	A	A	A	B	B	A	B	A
*synopGBS100	107.65	3D	TGCAGACACATTTGGACTACATCTCAAACAGACATGGCCGACCACATGCGCATATACCATGAA	A/G	0	1021	-1	55	2	79	87	6	0.855615	A	B	A	B	A	B	B	A	B	B	A	B	B	A	B	A	B	A	B	B	B	A	B	A	B	B	A	A	A	A	A	B	B	A	B	A
*synopGBS1354	108.49	3D	TGCAGTTACTAATACCTCTGTCAACCCTCCTGATTGGGCTAGCTCGAGAAAAAGGAACCATCA	A/G	0	15521	-1	11	3	75	82	3	0.823529	A	B	A	B	A	B	B	A	B	B	B	B	B	A	B	A	B	A	B	B	B	A	B	A	B	B	A	A	A	A	A	B	B	A	B	A
*synopGBS1237	114.8	3D	TGCAGTGAAAAGTCTTGAAGCGGGCAAAACGATGCTCCGCAGATCCGCGGATTTCAAGGAGCC	A/G	0	14590	-1	25	1	80	92	6	0.887701	A	B	A	B	A	B	B	A	B	B	B	B	B	A	B	B	B	A	B	B	B	A	B	A	A	B	A	A	A	A	A	B	B	A	B	A
*synopGBS18	114.8	3D	TGCAGAAAGATATCAAGCTGATCTAAATGCTTTCGTGTTGAGTCACCTGACTATTTCTTCGCG	G/T	0	182	-1	41	3	85	80	3	0.86631	A	B	A	B	A	B	B	A	B	B	B	B	B	A	B	B	B	A	B	B	B	A	B	A	A	B	A	A	A	A	A	B	B	A	B	A
*synopGBS1439	119.53	3D	TGCAGTTGCCTTAGTTTCCACAATCTTCTCACCATTGGGCACTGGCCACCATTCGTAAGGGGA	C/G	0	16071	-1	18	1	83	105	8	0.962567	A	B	A	B	A	B	B	A	B	B	B	B	B	A	B	B	B	A	B	B	B	A	B	A	A	B	A	A	A	A	A	B	A	A	B	A
*synopGBS381	129.56	3D	TGCAGCATCATCCACTCGGCAGCAACTCCCACCAGTCGACATGGGCCCTCGGATGGGACTAGC	C/A	0	4861	-1	46	2	75	93	8	0.855615	A	B	A	B	A	B	B	A	B	B	B	B	B	A	A	B	B	A	B	B	B	A	A	A	A	B	A	A	A	A	A	B	A	A	B	A
*synopGBS551	129.56	3D	TGCAGCTAGGGATGTCAGATTAGTCATGATAGAGCCTTGTCGTTAAGGCCATGCTCAGCTGAG	G/T	0	7895	-1	38	3	87	72	4	0.828877	A	B	A	B	A	B	B	A	B	B	B	B	B	A	A	B	B	A	B	B	B	A	A	A	A	B	A	A	A	A	A	B	A	A	B	A
*synopGBS552	129.56	3D	TGCAGCTAGGGATGTCAGATTAGTCATGATAGAGCCTTGTCGTTAAGGCCATGCTCAGCTGAG	T/G	0	7896	-1	39	3	87	72	4	0.828877	A	B	A	B	A	B	B	A	B	B	B	B	B	A	A	B	B	A	B	B	B	A	A	A	A	B	A	A	A	A	A	B	A	A	B	A
*synopGBS792	129.56	3D	TGCAGGCATCCAGGATGGAGCTTGCAGAGCGGATGATGGCGTCGAACTCTGGGGGGCGAGGAA	C/T	0	10669	-1	42	3	78	94	6	0.887701	A	B	A	B	A	B	B	A	B	B	B	B	B	A	A	B	B	A	B	B	B	A	A	A	A	B	A	A	A	A	A	B	A	A	B	A
*synopGBS901	130.4	3D	TGCAGGGGATGGCAAGGCCACCTTGTCATGTTCGGCGGGGCCCCCCGAAAACCTGCTGTCATC	C/G	0	11862	-1	52	3	93	79	12	0.855615	A	B	A	B	A	B	B	A	B	B	B	B	B	A	A	B	B	A	B	A	B	A	A	A	A	B	A	A	A	A	A	B	A	A	B	A
*synopGBS1202	134.07	3D	TGCAGTCGTCAACAACAGGAGCTGGACCCCACTCGCGGGCGTGCTACAACAATCCCTGCGGCC	A/G	0	14376	-1	25	3	86	71	4	0.818182	A	B	A	B	A	B	B	A	B	B	B	B	B	A	A	B	B	A	-	A	B	A	A	A	A	B	A	A	A	A	A	B	A	A	B	A
*synopGBS1203	134.07	3D	TGCAGTCGTCAACAACAGGAGCTGGACCCCACTCGCGGGCGTGCTACAACAATCCCTGCGGCC	C/A	0	14377	-1	26	3	86	71	4	0.818182	A	B	A	B	A	B	B	A	B	B	B	B	B	A	A	B	B	A	-	A	B	A	A	A	A	B	A	A	A	A	A	B	A	A	B	A
*synopGBS643	136.57	3D	TGCAGCTTCTGCCTCTTCTGCCGAACTGCATTGTGGTAACCGCCTTCCCACTGACAAAAACAC	A/G	0	9215	-1	56	1	88	83	5	0.887701	A	B	A	B	A	B	B	A	B	B	B	B	B	A	A	B	B	A	-	A	B	A	A	A	A	B	A	A	A	A	A	B	A	A	B	A
*synopGBS175	145.24	3D	TGCAGAGAACGGTAATTTCTCGACAACCTGCATGGGTAGAACTTTATTGTTCTAGCGACGGTG	G/T	0	1670	-1	33	3	83	93	6	0.909091	A	B	A	B	A	B	B	A	B	A	B	A	B	A	A	B	B	A	A	A	B	A	A	A	A	B	A	A	A	A	A	B	A	A	B	A
*synopGBS815	147.68	3D	TGCAGGCCGCATGCTCGGAGCCGTACTTGTAGTCGTCAGCCTCGGGGTAAGCGAGGAGGCGGA	A/G	0	10890	-1	37	2	78	80	2	0.834225	A	B	-	B	A	A	B	A	B	A	B	A	B	A	A	B	B	A	A	A	B	A	A	A	A	B	A	A	A	A	A	B	A	A	B	A
*synopGBS816	147.68	3D	TGCAGGCCGTCACAGTATCCCAGGAGCCTGACACCATTCTCTGAAAGTGGACGGAGAACGGGG	A/G	0	10920	-1	43	3	72	85	1	0.834225	A	B	B	B	A	A	B	A	B	A	B	A	B	A	A	B	B	A	A	A	B	A	A	A	A	B	A	A	A	A	A	B	A	A	B	A
*synopGBS1027	148.55	3D	TGCAGGTTTAAATCGCCCCCGCCGCTAACGTGTGTCCCAGATAAATGCCAAGGCGCCCAATCC	C/G	0	13039	-1	17	3	86	77	4	0.850267	A	B	B	B	A	A	B	A	B	A	B	A	B	A	A	B	B	A	A	A	B	A	A	B	A	B	A	A	A	A	A	B	A	A	B	A
*synopGBS341	148.55	3D	TGCAGCAAGAAGCAACTTGTTCAATCTGAAATCGACGGCGGGGCGATGAGACGAGGCGAGATA	A/C	0	3664	-1	14	3	70	84	3	0.807487	A	B	B	B	A	A	B	A	B	A	B	A	B	A	A	B	B	A	A	A	B	A	A	B	A	B	A	A	A	A	A	B	A	A	B	A
*synopGBS418	148.55	3D	TGCAGCCACGGGGCCTTCCTCGTTCACCTCGAGGACGGCCTTGTGGAACACCTCGTCCAGGCG	G/C	0	5362	-1	36	3	88	79	8	0.850267	A	B	B	B	A	A	B	A	B	A	B	A	B	A	A	B	B	A	A	A	B	A	A	B	A	B	A	A	A	A	A	B	A	A	B	A
*synopGBS419	148.55	3D	TGCAGCCACGGTGCCTTCCTCGTTCACCTCGAGGACCGCCTTGTGGAACACCTCGTCCAGGCG	C/G	0	5363	-1	36	1	79	87	8	0.84492	A	B	B	B	A	A	B	A	B	A	B	A	B	A	A	B	B	A	A	A	B	A	A	B	A	B	A	A	A	A	A	B	A	A	B	A
*synopGBS887	149.5	3D	TGCAGGGCACCCTTGAATCTGCACTGAAATAAAAAAGGGTGCTACTTGTGTTGGATGACATGT	A/C	0	11652	-1	30	3	72	81	2	0.807487	A	B	B	B	A	A	B	A	B	A	B	A	B	A	A	B	B	A	A	A	B	A	A	B	A	B	A	-	A	A	A	B	A	A	B	A
*synopGBS268	152.04	3D	TGCAGATCTTGGCCCAACCTGGCGTGTTAGCGCCAGTCATCCCGTTGCTGCTCCTTTAGCCGC	C/T	0	2824	-1	59	3	93	81	5	0.903743	A	B	B	B	A	A	B	A	B	A	B	A	B	A	A	B	B	A	A	A	B	A	A	B	A	B	A	B	A	A	A	B	A	A	B	A
*synopGBS1074	158.03	3D	TGCAGTACCTCTGCTCAGGCGAGAAGGATCCATCCACTGATAATGCTAGTCTGTCCGTTTGCG	C/T	0	13364	-1	7	3	84	68	1	0.807487	A	B	B	B	A	A	B	A	B	A	B	A	B	A	A	B	B	A	A	A	B	A	A	B	B	B	A	B	A	B	A	B	A	A	B	A
*synopGBS1232	158.86	3D	TGCAGTCTGGTTCACCCTTCCATTCTATCTTCACTTCTTCCAGAGCAGGTGCCCAACTCAGTA	A/G	0	14533	-1	13	3	94	78	6	0.887701	A	B	B	B	A	A	-	A	B	A	B	A	B	A	A	B	B	A	A	A	B	A	A	B	B	B	A	B	A	A	A	B	A	A	B	A
*synopGBS95	159.73	3D	TGCAGACAACCACACCGTAAACTGCTCTCTCGCGAGGGTGTGCGGCCATCGCCGAGGCCGCCA	A/G	0	971	-1	11	3	76	76	1	0.807487	A	B	B	B	A	A	-	A	-	A	B	A	B	A	A	B	B	A	A	A	-	A	A	B	B	B	A	B	A	B	A	B	-	A	B	A
*synopGBS96	159.73	3D	TGCAGACAACCACACCGTAAACTGCTCTCTCGCGAGGGTGTGCGGCCATCGCCGAGGCCGCCA	T/C	0	972	-1	40	3	76	76	1	0.807487	A	B	B	B	A	A	-	A	-	A	B	A	B	A	A	B	B	A	A	A	-	A	A	B	B	B	A	B	A	B	A	B	-	A	B	A
*synopGBS650	0.85	4A	TGCAGCTTGTACTCGTCCGCGAGGAGGGCGCAGAGCTTGAGGAGGAGGCTGCCCATGGCCCCC	A/C	0	9338	-1	31	2	73	82	3	0.812834	A	B	-	-	A	A	-	B	A	A	-	A	-	B	A	A	B	B	B	B	B	B	B	A	B	B	A	B	B	-	B	-	B	A	-	A
*synopGBS921	0.85	4A	TGCAGGTAATAAAGTTTCTCCACCAACAACAAGCCTTTGTGGCTCTCGGTCGAATACCCACGC	A/C	0	12126	-1	10	3	84	77	5	0.834225	A	B	-	-	A	A	-	B	A	A	A	A	B	B	A	A	B	B	B	B	B	B	B	A	B	B	A	B	B	A	B	-	B	A	B	A
*synopGBS922	0.85	4A	TGCAGGTAATAAAGTTTCTCCACCAACAACAAGCCTTTGTGGCTCTCGGTCGAATACCCACGC	A/G	0	12127	-1	28	3	84	77	5	0.834225	A	B	-	-	A	A	-	B	A	A	A	A	B	B	A	A	B	B	B	B	B	B	B	A	B	B	A	B	B	A	B	-	B	A	B	A
*synopGBS923	0.85	4A	TGCAGGTAATAAAGTTTCTCCACCAACAACAAGCCTTTGTGGCTCTCGGTCGAATACCCACGC	A/G	0	12128	-1	31	3	84	77	5	0.834225	A	B	-	-	A	A	-	B	A	A	A	A	B	B	A	A	B	B	B	B	B	B	B	A	B	B	A	B	B	A	B	-	B	A	B	A
*synopGBS617	4.7	4A	TGCAGCTGGGTCTCGAGTGCTGCAAGCTCTTCAGGTGTCATGGCAGAGGGAGGGGGTTGAGGA	A/G	0	8912	-1	23	3	82	74	6	0.802139	A	B	B	B	A	A	B	B	A	A	A	A	B	B	A	A	B	B	B	B	B	B	B	A	B	B	A	B	B	A	B	A	B	A	B	A
*synopGBS1136	5.63	4A	TGCAGTATGCATTCAACCCTATCTGTTCCATGCAGTTGCCTGAAACGCGCACCTTCGTGCTGC	A/G	0	13767	-1	20	3	77	87	5	0.850267	A	B	B	B	A	A	B	B	A	A	A	A	B	B	A	A	B	B	B	B	B	B	B	A	B	B	A	B	B	A	B	A	B	A	B	A
*synopGBS333	7.38	4A	TGCAGCAAAAGATCTCCGCTTCCCTCCTCCCTGTAGTCATGGGAGGAGACTTGAACCTTATCC	G/T	0	3461	-1	52	3	84	82	4	0.86631	A	B	B	B	A	A	B	B	A	A	A	A	B	B	A	A	B	B	B	B	B	B	B	A	B	B	A	B	B	A	B	B	B	A	B	A
*synopGBS211	8.25	4A	TGCAGATAGCGTCAATGAACTAACTTACCTTGAAGAGGATACAAGCACGGATATCTGACTGTG	C/T	0	2395	-1	23	3	82	79	4	0.839572	A	B	B	B	A	A	B	B	A	A	A	A	B	B	A	A	B	B	B	B	B	B	B	A	B	B	A	B	B	A	B	B	B	A	B	A
*synopGBS1450	9.09	4A	TGCAGTTGGTGTCCCTCCAGGAAACTTCGCCTTCCCTATGGAGCGCACTGTTGCCACAGATGT	A/G	0	16191	-1	55	3	73	91	3	0.860963	A	B	B	B	A	A	B	B	A	A	A	A	B	B	A	A	B	B	B	B	B	B	B	A	B	B	A	B	B	A	B	B	B	A	B	A
*synopGBS919	9.09	4A	TGCAGGTAAGGGAGGGAAGGGTCGAATGGGGCTGCACTGCCCGAGACGCTGGCGAAGAGGGGG	A/G	0	12121	-1	35	3	81	78	6	0.818182	A	B	B	B	A	A	B	B	A	A	A	A	B	-	A	A	B	B	B	-	B	B	B	A	B	B	A	B	B	A	B	B	-	A	B	A
*synopGBS1130	19.4	4A	TGCAGTATACTCTGTACGAACTTTTGTGGAGTATGTTCGCTGTAGATGCAGGATGCAATAGAT	A/T	0	13707	-1	49	1	70	96	5	0.860963	A	B	B	B	A	A	B	B	A	A	A	B	B	A	A	A	B	B	B	A	B	B	B	A	B	B	A	B	B	A	B	B	A	A	B	A
*synopGBS230	19.4	4A	TGCAGATCCCGTGTCAACTACTACACTGTCTCACATCACGTCTGGGAATGACCAGTGATTTTT	C/G	0	2626	-1	25	3	96	80	10	0.887701	A	B	B	B	A	A	B	B	A	A	A	B	B	A	A	A	B	B	B	A	B	B	B	A	B	B	A	B	B	A	B	B	A	A	B	A
*synopGBS231	19.4	4A	TGCAGATCCCGTGTCAACTACTACACTGTCTCACATCACGTCTGGGAATGACCAGTGATTTTT	T/C	0	2627	-1	35	3	96	80	10	0.887701	A	B	B	B	A	A	B	B	A	A	A	B	B	A	A	A	B	B	B	A	B	B	B	A	B	B	A	B	B	A	B	B	A	A	B	A
*synopGBS518	19.4	4A	TGCAGCGTTCGTGCGCTGGGAAGGAATTCTGCTGTGTCTCCCTCCTCATTCTTCTTCTGTACT	C/G	0	7626	-1	43	2	65	96	3	0.84492	A	B	B	B	A	A	B	B	A	A	A	B	B	A	A	A	B	B	B	A	B	B	B	A	B	B	A	B	B	A	B	B	A	A	B	A
*synopGBS492	21.8	4A	TGCAGCCTGTTCTGTCCAACCCCGTCCTTGGTCGACATCATCGTCAACAAGTACAACCTGCGC	C/T	0	6564	-1	62	1	91	100	14	0.946524	A	B	A	B	A	A	B	B	A	A	A	B	B	A	A	A	B	B	B	A	B	B	B	B	B	B	A	B	B	A	B	B	A	A	B	A
*synopGBS1339	22.55	4A	TGCAGTGTGTGCTGGCTTTGGTCATCGAGGCTGGCTTTCCAGACGAGGAGCGCCCTCGCCTGT	A/G	0	15401	-1	23	3	88	86	5	0.903743	A	B	A	B	A	A	B	B	A	A	A	B	B	A	A	A	B	B	B	A	B	B	B	B	B	B	A	B	B	A	B	B	A	A	B	A
*synopGBS82	28.41	4A	TGCAGAATGGAGAGAAGCGGAAGCATCAGGACTGCAAACCAGTCAACGTGGTCAAACCTAGGC	A/C	0	845	-1	21	3	57	98	2	0.818182	A	B	A	B	A	A	B	A	A	A	A	B	B	A	A	A	B	B	B	A	B	B	B	B	B	A	A	B	B	A	B	B	A	A	B	A
*synopGBS83	28.41	4A	TGCAGAATGGAGAGAAGCGGAAGCATCAGGACTGCAAACCAGTCAACGTGGTCAAACCTAGGC	C/G	0	846	-1	62	2	57	98	2	0.818182	A	B	A	B	A	A	B	A	A	A	A	B	B	A	A	A	B	B	B	A	B	B	B	B	B	A	A	B	B	A	B	B	A	A	B	A
*synopGBS620	33.82	4A	TGCAGCTGTGCTCGTGGCAGCCCCAAGCGACAGGAAATTTTCAACAAACATGGCCTTTTTCAG	G/T	0	8989	-1	62	2	72	99	8	0.871658	A	B	A	B	A	A	B	A	A	A	A	B	B	A	A	A	B	B	B	A	B	B	B	B	B	A	A	B	B	A	B	-	A	A	B	A
*synopGBS903	35.59	4A	TGCAGGGGGAATGAAGGTGCTCGCCTTCTCCTGTTGAAGTGCTGGAGGCGTGTTAGGTAGAGA	A/G	0	11904	-1	13	3	102	55	5	0.812834	A	B	A	B	A	A	B	A	A	A	A	B	B	A	A	A	B	B	B	A	B	B	B	B	B	A	A	B	B	A	B	-	A	A	B	A
*synopGBS108	37.51	4A	TGCAGACACTATGGCCATGGCGGAGAGGATCAAGATGGCGACAGCTGCTGCCATGGGGGAGCC	C/G	0	1058	-1	38	2	78	84	8	0.823529	A	B	A	B	A	A	B	A	A	A	A	B	B	A	A	-	B	B	B	A	B	B	B	B	B	A	A	B	B	A	B	-	A	A	B	A
*synopGBS1186	42.1	4A	TGCAGTCCTGTTCTTCTCAGATCGTAGATTGGATGTCAATTTTCACAACTCCACCACAGCAAA	C/T	0	14238	-1	12	3	75	96	7	0.877005	A	B	A	B	A	A	B	A	A	A	A	B	B	A	A	B	B	B	B	A	A	B	B	B	B	A	A	B	B	A	B	A	A	A	B	A
*synopGBS1416	42.95	4A	TGCAGTTGAGATGCGTCACTGGCAGAGGAGAATTGAGATATTGGGCGGATGGAGAAAGGAAAT	G/T	0	15986	-1	9	1	82	77	7	0.812834	A	B	A	B	A	A	B	A	A	A	A	B	B	A	A	B	B	B	B	A	A	B	B	B	B	A	A	B	B	A	B	B	A	A	B	A
*synopGBS1184	44.72	4A	TGCAGTCCTGCCTTCCGCCAATCGCCCACCTGCTGGCTCCGCTAGTCGCCCAAGACGTCGTCC	A/G	0	14228	-1	27	3	109	84	9	0.983957	A	B	A	B	A	A	B	A	A	A	A	B	B	A	A	B	B	B	B	A	A	B	B	B	B	A	A	B	B	A	B	B	A	A	B	A
*synopGBS1308	44.72	4A	TGCAGTGGAAAGGGCTTCTAGGCTGCCATTACTCCTGCTCAAACGTGCAGTAGCGCTTGCTGC	T/C	0	15059	-1	50	3	96	77	7	0.887701	A	B	A	B	A	A	B	A	A	A	A	B	B	A	A	B	B	B	B	A	A	B	B	B	B	A	A	B	B	A	B	B	A	A	B	A
*synopGBS1309	44.72	4A	TGCAGTGGAAAGTGCTTCTAGGCTGCCATTACTCCTGCTCAAACGTGCAGCAGCGCTTGCTGC	C/T	0	15060	-1	50	1	77	96	7	0.887701	A	B	A	B	A	A	B	A	A	A	A	B	B	A	A	B	B	B	B	A	A	B	B	B	B	A	A	B	B	A	B	B	A	A	B	A
*synopGBS1369	44.72	4A	TGCAGTTATGCTACGCCTGGACGCGTACTACACCCCTGTCGCTGGCTGCATCCATGTCTTGAT	G/A	0	15602	-1	22	3	103	78	5	0.941176	A	B	A	B	A	A	B	A	A	A	A	B	B	A	A	B	B	B	B	A	A	B	B	B	B	A	A	B	B	A	B	B	A	A	B	A
*synopGBS1370	44.72	4A	TGCAGTTATGCTACGCCTGGCCACGTACTACACCCCTGTCGCTGGCTGCATCCATGTCTTGGG	A/G	0	15603	-1	22	3	78	102	5	0.935829	A	B	A	B	A	A	B	A	A	A	A	B	B	A	A	B	B	B	B	A	A	B	B	B	B	A	A	B	B	A	B	B	A	A	B	A
*synopGBS1371	44.72	4A	TGCAGTTATGCTACGCCTGGCCACGTACTACACCCCTGTCGCTGGCTGCATCCATGTCTTGGG	G/A	0	15604	-1	61	3	78	102	5	0.935829	A	B	A	B	A	A	B	A	A	A	A	B	B	A	A	B	B	B	B	A	A	B	B	B	B	A	A	B	B	A	B	B	A	A	B	A
*synopGBS1164	47.03	4A	TGCAGTCATATGATCAGTGTATCTACCATACCAAGGCCTCTGATTTAGCCATCGCGTGCAGCG	A/G	0	13998	-1	42	3	70	96	5	0.860963	A	B	A	B	A	A	B	A	A	A	A	B	B	A	A	B	B	B	B	A	A	B	B	B	B	A	A	B	B	A	B	B	A	A	B	A
*synopGBS1003	49.57	4A	TGCAGGTTCGAACCAACTCAGGGATGTTAATGAACACCAAGTTTCAGCACAGACAGTACTACA	G/T	0	12902	-1	5	3	98	75	5	0.898396	A	B	A	B	A	A	B	A	A	A	A	B	B	A	A	B	B	B	B	A	A	B	B	B	B	A	A	B	B	A	B	B	A	A	B	A
*synopGBS1004	49.57	4A	TGCAGGTTCGAACCAACTCAGGGATGTTAATGAACACCAAGTTTCAGCACAGACAGTACTACA	T/A	0	12903	-1	17	3	103	69	4	0.898396	A	B	A	B	A	A	B	A	A	A	A	B	B	A	A	B	B	B	B	A	A	B	B	B	B	A	A	B	B	A	B	B	A	A	B	A
*synopGBS1005	49.57	4A	TGCAGGTTCGAACCAACTCAGGGATGTTAATGAACACCAAGTTTCAGCACAGACAGTACTACA	G/C	0	12904	-1	31	3	103	69	4	0.898396	A	B	A	B	A	A	B	A	A	A	A	B	B	A	A	B	B	B	B	A	A	B	B	B	B	A	A	B	B	A	B	B	A	A	B	A
*synopGBS1021	49.57	4A	TGCAGGTTGGGCATTTGATCAAGTCAAAAGACGAGTAAAAGTCTACATCGGCCAGCTACTGAA	C/T	0	12997	-1	55	3	66	87	3	0.802139	A	B	A	B	A	A	B	A	A	A	A	B	B	A	A	B	B	B	B	A	A	B	B	B	B	A	A	B	B	A	B	B	A	A	B	A
*synopGBS1022	49.57	4A	TGCAGGTTGGGCATTTGATCAAGTCAAAAGACGAGTAAAAGTCTACATCGGCCAGCTACTGAA	C/T	0	12998	-1	58	3	66	87	3	0.802139	A	B	A	B	A	A	B	A	A	A	A	B	B	A	A	B	B	B	B	A	A	B	B	B	B	A	A	B	B	A	B	B	A	A	B	A
*synopGBS840	49.57	4A	TGCAGGCTCCAGACAGCCTCTTGACATCCAATCGACTGAGCTTCGGTCGAACCGAACAAGTTG	A/C	0	11301	-1	12	3	70	95	4	0.860963	A	B	A	B	A	A	B	A	A	A	A	B	B	A	A	B	B	B	B	A	A	B	B	B	B	A	A	B	B	A	B	B	A	A	B	A
*synopGBS841	49.57	4A	TGCAGGCTCCAGACAGCCTCTTGACATCCAATCGACTGAGCTTCGGTCGAACCGAACAAGTTG	T/C	0	11302	-1	31	3	70	95	4	0.860963	A	B	A	B	A	A	B	A	A	A	A	B	B	A	A	B	B	B	B	A	A	B	B	B	B	A	A	B	B	A	B	B	A	A	B	A
*synopGBS983	49.57	4A	TGCAGGTGATGTTCGACGATGGCGCCGACGATGGCGGATGTGGATCATGGTTAGCACTGTGCA	A/T	0	12592	-1	8	2	101	65	7	0.850267	A	B	A	B	A	A	B	A	A	A	A	B	B	A	A	B	B	B	B	A	A	B	B	B	B	A	A	B	B	A	B	B	A	A	B	A
*synopGBS699	50.48	4A	TGCAGGACATGGCCTTGGTCGCCACCCTCGGCATACGACCTCCTACACCAGCTGAGGCTCATC	A/G	0	9810	-1	8	3	95	62	7	0.802139	A	B	A	B	A	A	B	A	A	A	A	B	B	A	A	B	B	B	B	A	A	B	B	B	B	A	A	B	B	A	B	B	A	A	B	A
*synopGBS587	52.94	4A	TGCAGCTCCTTGCTGTACCCTTGGTGACAGAGGCGTCCCGCAAACGGGCCAACCAGGACGCAT	A/C	0	8278	-1	16	3	97	82	5	0.930481	A	B	A	B	A	A	B	A	A	A	A	B	B	A	A	B	B	B	B	A	A	B	B	B	B	A	A	B	B	A	B	B	A	A	B	A
*synopGBS588	52.94	4A	TGCAGCTCCTTGCTGTACCCTTGGTGACAGAGGCGTCCCGCAAACGGGCCAACCAGGACGCAT	C/T	0	8279	-1	38	3	97	82	5	0.930481	A	B	A	B	A	A	B	A	A	A	A	B	B	A	A	B	B	B	B	A	A	B	B	B	B	A	A	B	B	A	B	B	A	A	B	A
*synopGBS689	52.94	4A	TGCAGGAAGTTGCCGCGTTGCCAGAGGGCGGAAGAGGCCGAAGCCCGAGCGGCCCTCGCGGGA	G/A	0	9689	-1	46	3	74	90	4	0.855615	A	B	A	B	A	A	B	A	A	A	A	B	B	A	A	B	B	B	B	A	A	B	B	B	B	A	A	B	B	A	B	B	A	A	B	A
*synopGBS690	52.94	4A	TGCAGGAAGTTGCCGCGTTGCCAGAGTGCGGAAGAGGCCGAAGCCCAAGCGGCCCTCGCGGGA	A/G	0	9690	-1	46	1	90	73	4	0.850267	A	B	A	B	A	A	B	A	A	A	A	B	B	A	A	B	B	B	B	A	A	B	B	B	B	A	A	B	B	A	B	B	A	A	B	A
*synopGBS327	54.55	4A	TGCAGATTTCAGAGATGACGATGAATCAGAAAGCACGGCGGGAGGGAGCGCGATGGGGGAGAC	C/T	0	3363	-1	18	2	92	99	15	0.941176	A	B	A	B	A	A	B	A	A	A	A	B	B	A	A	B	B	B	B	A	A	B	B	B	B	A	A	B	B	A	B	B	A	A	B	A
*synopGBS500	54.55	4A	TGCAGCGAAAGGCCACCACCCCTCGCCCCCGATCCCGTCGCTCCACCCAGCTACCTCAGACAG	A/G	0	6697	-1	61	3	93	65	2	0.834225	A	B	A	B	A	A	B	A	A	A	A	B	B	A	A	B	B	B	B	A	A	B	B	B	B	A	A	B	B	A	B	B	A	A	B	A
*synopGBS515	54.55	4A	TGCAGCGTAGAGGAACGTCTTGAGAGGGAATTCGAAGGCAGAATCAGTGGCGTTGTTGGGGAT	C/T	0	7468	-1	38	3	63	100	10	0.818182	A	B	A	B	A	A	B	A	A	A	A	B	B	A	A	B	B	B	B	A	A	B	B	B	B	A	A	B	B	A	B	B	A	A	B	A
*synopGBS516	54.55	4A	TGCAGCGTAGAGGAACGTCTTGAGAGGGAATTCGAAGGCAGAATCAGTGGCGTTGTTGGGGAT	G/T	0	7469	-1	40	3	63	100	10	0.818182	A	B	A	B	A	A	B	A	A	A	A	B	B	A	A	B	B	B	B	A	A	B	B	B	B	A	A	B	B	A	B	B	A	A	B	A
*synopGBS525	54.55	4A	TGCAGCTAAGCATTTTCAGCTAAGTCATTCTTGGGCAGCGAGAGCAGAAGAGTCCGTGTCTGT	A/T	0	7699	-1	50	3	72	92	7	0.839572	A	B	A	B	A	A	B	A	A	A	A	B	B	A	A	B	B	B	B	A	A	B	B	B	B	A	A	B	B	A	B	B	A	A	B	A
*synopGBS325	56.9	4A	TGCAGATTGGGGTTTGGAGTTGGGGAGCGGGGACTCGTCTTGTTAGATCGATAGTTATTGTCG	C/T	0	3322	-1	48	3	91	79	6	0.877005	A	B	A	B	A	A	B	A	A	A	A	B	B	A	A	B	B	B	B	A	B	B	B	B	B	A	A	B	B	A	B	B	A	A	B	A
*synopGBS104	58.64	4A	TGCAGACACCCGTCCAGCCATCGAGCTAGCCCGCACGGCCGCAGGCCGTAGCCTGCATAAAAA	A/T	0	1028	-1	59	3	85	69	3	0.807487	A	B	A	B	A	A	B	A	A	A	A	B	B	A	A	B	B	B	B	A	A	B	B	B	B	A	A	B	B	A	B	B	A	A	B	A
*synopGBS608	60.41	4A	TGCAGCTGATGCCAGCGCAGTCTATTATTGACGAATAGTGGGGCAATCCAGTACTATACAAAA	A/C	0	8621	-1	34	3	100	66	5	0.860963	A	B	A	B	B	A	B	A	A	A	A	B	B	A	A	B	B	B	B	A	A	B	B	B	B	A	A	B	B	A	B	B	A	A	B	A
*synopGBS1466	62.99	4A	TGCAGTTTATGTACGAACTTTGAGAATTCTCATCAGTGGCCAAACGCCCAAACTAACCAATTG	A/G	0	16341	-1	34	3	75	101	10	0.887701	A	B	A	B	B	A	B	A	A	A	A	B	B	A	A	B	B	B	B	A	A	B	B	B	B	A	A	B	B	A	B	B	A	A	B	A
*synopGBS703	64.67	4A	TGCAGGACGGCGTCCTGGACGATGTAGCTGCCATATTTGCCGTGCACATCAACACGAGCATGC	C/T	0	9909	-1	7	3	75	90	4	0.860963	A	B	A	B	B	A	B	A	A	A	A	B	B	A	A	B	B	B	B	A	A	B	B	B	B	A	A	B	B	A	B	B	A	A	B	A
*synopGBS881	64.67	4A	TGCAGGGATCGTGACCCACAACTCGAGTAGGACTAGGGGCCCACCATAGGAGCCAGCCGTTGT	A/G	0	11612	-1	13	3	71	90	3	0.84492	A	B	A	B	B	A	B	A	A	A	A	B	B	A	A	B	B	B	B	A	A	B	B	B	B	A	A	B	B	A	B	B	A	A	B	A
*synopGBS1455	66.26	4A	TGCAGTTGTCCAACAGCCAGTAGATTGTGTTTCCAACCAGAGCCGTGGGCGTTGCCTGACCTA	C/T	0	16223	-1	60	1	87	93	7	0.925134	A	B	A	-	B	A	B	A	A	A	A	B	B	A	A	B	B	B	B	A	A	B	B	B	B	A	A	B	B	A	B	B	A	A	B	A
*synopGBS507	92.86	4A	TGCAGCGCACGATACTTGCACGAGGGCCTGGAGAGGATCTAAATGTTGAAGTTGTATGCTGCA	A/G	0	6985	-1	40	3	71	90	3	0.84492	A	B	A	-	B	A	B	A	A	A	A	B	B	A	A	B	B	B	B	A	A	B	A	B	B	A	A	B	B	A	-	B	A	B	B	A
*synopGBS1125	103.62	4A	TGCAGTAGTGATTCAGAGGACTGAATGAGAATGGTTGACATATCCTGTCTGGGCTGGGCTTCT	A/G	0	13660	-1	6	3	85	87	13	0.850267	A	B	A	-	B	A	B	A	A	A	A	B	B	A	A	B	B	B	B	A	A	B	A	B	B	B	A	A	B	A	A	A	A	B	B	A
*synopGBS1129	103.62	4A	TGCAGTATAAGTCGGCTACTGCTAGCAGTGGCCGAACACGGTTCCCTGCCAGGGCATGAGCTC	C/G	0	13697	-1	18	3	81	81	0	0.86631	A	B	A	A	B	A	B	A	A	A	A	B	B	A	A	B	B	B	B	A	A	B	A	B	B	B	A	A	B	A	A	A	A	B	B	A
*synopGBS1480	103.62	4A	TGCAGTTTGTATAAGCACAACGACGGGATGGATGTTGTGACAACTATAAGGTTGTCGGCGAGG	A/G	0	16507	-1	45	1	85	79	5	0.850267	A	B	A	A	B	A	B	A	A	A	A	B	B	A	A	B	B	B	B	A	A	B	A	B	B	B	A	A	B	A	A	A	A	B	B	A
*synopGBS1424	104.53	4A	TGCAGTTGATGGCAGCATGAAGGACGTGTTGGAGATGAAGCAAATTAAACTGACTGTGGCACA	G/A	0	16012	-1	25	3	77	85	6	0.834225	A	B	A	A	B	A	B	A	A	A	A	B	B	A	A	B	B	B	B	A	A	B	A	-	B	B	A	A	-	-	A	A	A	B	B	A
*synopGBS1425	104.53	4A	TGCAGTTGATGGCAGCATGAAGGACGTGTTGGAGATGAAGCAAATTAAACTGACTGTGGCACA	T/C	0	16013	-1	35	3	77	85	6	0.834225	A	B	A	A	B	A	B	A	A	A	A	B	B	A	A	B	B	B	B	A	A	B	A	-	B	B	A	A	-	-	A	A	A	B	B	A
*synopGBS1426	104.53	4A	TGCAGTTGATGGCAGCATGAAGTACATGTTGGAGACGAAGCAAATTAAACTGACTGGGGCACA	A/G	0	16014	-1	25	3	85	77	6	0.834225	A	B	A	A	B	A	B	A	A	A	A	B	B	A	A	B	B	B	B	A	A	B	A	-	B	B	A	A	-	-	A	A	A	B	B	A
*synopGBS1427	104.53	4A	TGCAGTTGATGGCAGCATGAAGTACATGTTGGAGACGAAGCAAATTAAACTGACTGGGGCACA	C/T	0	16015	-1	35	3	85	77	6	0.834225	A	B	A	A	B	A	B	A	A	A	A	B	B	A	A	B	B	B	B	A	A	B	A	-	B	B	A	A	-	-	A	A	A	B	B	A
*synopGBS1387	111.47	4A	TGCAGTTCATGTCGACTCCGACCTTGGACCTTGCTAGAGATCCTCGACACTTTGCCTAGACGA	C/T	0	15724	-1	41	3	80	86	11	0.828877	A	B	A	A	B	A	B	-	A	A	A	A	B	A	A	B	B	A	-	A	-	B	A	A	B	B	A	A	A	B	A	A	A	B	B	A
*synopGBS364	112.34	4A	TGCAGCACTTCTGTCAGGGCCCTCAGCACCCTCTGCTGCCCCAATTATTCCATCAATCTTCTT	C/T	0	4238	-1	32	3	84	82	3	0.871658	A	B	A	A	B	A	B	B	A	A	A	A	B	A	A	B	B	A	A	A	B	B	A	A	B	B	A	A	A	B	A	A	A	B	B	A
*synopGBS365	112.34	4A	TGCAGCACTTCTGTCAGGGCCCTCAGCACCCTCTGCTGCCCCAATTATTCCATCAATCTTCTT	T/G	0	4239	-1	33	3	84	82	3	0.871658	A	B	A	A	B	A	B	B	A	A	A	A	B	A	A	B	B	A	A	A	B	B	A	A	B	B	A	A	A	B	A	A	A	B	B	A
*synopGBS933	112.34	4A	TGCAGGTACGGGTTGTAAACGACAGGAAGCAGATGAGGCCTTCCCCAGGGATGGGATCAGCAG	A/G	0	12174	-1	18	2	97	86	6	0.946524	A	B	A	A	B	A	B	B	A	A	A	A	B	A	A	B	B	A	A	A	B	B	A	A	B	B	A	A	A	B	A	A	A	B	B	A
*synopGBS445	113.12	4A	TGCAGCCCCTGTCGGGGCTGTTACTGTGGCCTGCCTGCCTGCATGCATGCATGCATGCCTATG	A/C	0	5807	-1	42	3	97	79	8	0.898396	A	B	A	A	B	A	B	B	A	A	A	A	B	A	A	B	B	A	A	A	B	B	A	A	B	B	A	A	A	B	A	A	A	B	B	A
*synopGBS1218	118.19	4A	TGCAGTCTCATAGATTGGGAAAATAGTTTTGATGTGATGATGGCCCCAGCAGGACTTGGGCAT	T/C	0	14466	-1	32	3	95	67	5	0.839572	A	B	A	A	B	A	B	B	A	A	A	A	B	A	A	B	B	A	A	A	B	B	A	A	B	B	A	A	A	B	A	A	A	B	B	A
*synopGBS1383	118.19	4A	TGCAGTTCAGCGGCAAGCTCCTCCAGCCGCACCTCCATTTCCATGGCCTTGCGTGCCTTGTCC	A/G	0	15699	-1	36	2	90	65	4	0.807487	A	B	A	A	B	A	B	B	A	A	A	A	B	A	A	B	B	A	A	A	B	B	A	A	B	B	A	A	A	B	A	A	A	B	B	A
*synopGBS1408	118.19	4A	TGCAGTTCGTAGCAGGGGTCGTAGCAAAAAAAGCAACGCTTGCAGCTTTGCGCGTATATGGTT	C/T	0	15873	-1	19	2	73	100	8	0.882353	A	B	A	A	B	A	B	B	A	A	A	A	B	A	A	B	B	A	A	A	B	B	A	A	B	B	A	A	A	B	A	A	A	B	B	A
*synopGBS383	118.19	4A	TGCAGCATCTCTCCTGTGGATACACATGGCACCAGCAATACGAGCATCAGATGCAGCACCACA	C/T	0	4915	-1	8	3	98	72	4	0.887701	A	B	A	A	B	A	B	B	A	A	A	A	B	A	A	B	B	A	A	A	B	B	A	A	B	B	A	A	A	B	A	A	A	B	B	A
*synopGBS384	118.19	4A	TGCAGCATCTCTCCTGTGGATACACATGGCACCAGCAATACGAGCATCAGATGCAGCACCACA	C/T	0	4916	-1	31	3	98	72	4	0.887701	A	B	A	A	B	A	B	B	A	A	A	A	B	A	A	B	B	A	A	A	B	B	A	A	B	B	A	A	A	B	A	A	A	B	B	A
*synopGBS603	118.19	4A	TGCAGCTCTGCATCACTTGTACCTCCTCCCTAGGCAGAGAAGCTCTTGTCTGAGCCGTCCCCT	A/G	0	8496	-1	31	1	97	70	2	0.882353	A	B	A	A	B	A	B	B	A	A	A	A	B	A	A	B	B	A	A	A	B	B	A	A	B	B	A	A	A	B	A	A	A	B	B	A
*synopGBS866	118.19	4A	TGCAGGGAACGCGATCCCCTATCATCACGAACGATGAACTCTGGACGACTACAGTGCAACCCA	A/G	0	11478	-1	20	3	77	95	3	0.903743	A	B	A	-	B	A	B	B	A	A	A	A	B	A	A	B	B	A	A	A	B	B	A	A	B	B	A	A	A	B	A	A	A	B	B	A
*synopGBS698	121.45	4A	TGCAGGACATCGGCAACATCGCCTTGCCGCGGCGGCAGCCGTGAGCACTGACCATCCTCCTCC	C/G	0	9803	-1	39	3	82	106	12	0.941176	A	B	A	-	B	-	B	B	-	A	A	A	B	A	A	B	B	A	A	A	B	B	A	A	B	B	A	A	B	B	A	A	-	B	B	A
*synopGBS1117	123.14	4A	TGCAGTAGGAGCAAGGAACTTGGGCGGCCCAACTACGGCAGTTTTCATGGCTATATGATTCTG	A/G	0	13600	-1	13	3	67	93	7	0.818182	A	B	A	-	A	-	B	B	B	A	A	A	B	-	A	B	B	A	A	A	B	B	A	A	B	B	A	A	B	B	A	A	-	-	B	A
*synopGBS1177	141.34	4A	TGCAGTCCGTGCACCTCAGGCGTTGCCACGCCAAAACCCACATCACCATACCCAGACCCAGAG	A/G	0	14189	-1	27	1	84	94	9	0.903743	A	B	-	-	A	-	B	A	-	A	-	A	B	B	A	B	B	A	A	-	B	-	B	A	B	B	A	A	B	B	A	A	B	-	B	A
*synopGBS562	2.86	4B	TGCAGCTATGAGCAGCAAGGAACCCTGCAATATCATCTGTCCACAGCTCAAGCTCCTGATGTG	A/G	0	7971	-1	10	3	88	69	1	0.834225	A	B	B	A	B	B	A	B	A	B	B	-	A	A	B	A	B	A	A	A	-	B	B	-	B	B	A	B	A	B	B	B	B	-	A	A
*synopGBS563	2.86	4B	TGCAGCTATGAGCAGCAAGGAACCCTGCAATATCATCTGTCCACAGCTCAAGCTCCTGATGTG	G/A	0	7972	-1	11	3	88	69	1	0.834225	A	B	B	A	B	B	A	B	A	B	B	-	A	A	B	A	B	A	A	A	-	B	B	-	B	B	A	B	A	B	B	B	B	-	A	A
*synopGBS564	2.86	4B	TGCAGCTATGAGCAGCAAGGAACCCTGCAATATCATCTGTCCACAGCTCAAGCTCCTGATGTG	C/T	0	7973	-1	15	3	88	69	1	0.834225	A	B	B	A	B	B	A	B	A	B	B	-	A	A	B	A	B	A	A	A	-	B	B	-	B	B	A	B	A	B	B	B	B	-	A	A
*synopGBS124	7.1	4B	TGCAGACCCCGAGAGCAAGGGTGGCAGTCGATGCAGCTTGCCTCCCCGCTCCAGCTCGAGCCA	C/T	0	1226	-1	9	3	90	80	3	0.893048	A	B	B	A	B	B	A	B	-	B	B	A	B	A	B	A	B	A	A	A	A	B	B	B	B	B	A	B	B	B	B	B	B	B	-	A
*synopGBS594	10.95	4B	TGCAGCTCGACCTAGCCAAGTTTGTTTTTATCTATTTGTGTATCAGGCTGAAGAGCACGACGA	A/G	0	8295	-1	9	3	56	110	14	0.812834	A	B	B	A	B	B	A	B	B	B	B	A	B	A	B	A	B	A	A	-	A	B	B	B	B	B	A	B	B	B	B	B	B	B	B	A
*synopGBS885	39.46	4B	TGCAGGGCAAGTTCCTGCTCAACAGCACCGTCGCCAAGGCCACCATCTACGTCGAAGGGCCAA	C/G	0	11646	-1	31	3	75	99	4	0.909091	A	B	B	A	B	B	A	B	-	B	B	-	B	A	A	A	B	A	B	B	A	B	B	B	A	B	A	B	B	B	B	B	B	B	A	-
*synopGBS886	39.46	4B	TGCAGGGCAAGTTCCTGCTCAACAGCACCGTCGCCAAGGCCACCATCTACGTCGAAGGGCCAA	A/C	0	11647	-1	61	3	75	99	4	0.909091	A	B	B	A	B	B	A	B	-	B	B	-	B	A	A	A	B	A	B	B	A	B	B	B	A	B	A	B	B	B	B	B	B	B	A	-
*synopGBS76	43.57	4B	TGCAGAATGACCTGACTGATTGACAAATCGCTTTCTCTAGTGTGACACAAATATTAAGGAGAC	A/C	0	819	-1	55	3	76	90	6	0.855615	A	B	B	A	B	B	A	B	A	B	B	-	B	A	A	B	B	A	B	B	A	B	B	B	A	B	A	B	B	B	B	B	B	B	A	B
*synopGBS574	44.35	4B	TGCAGCTCATCTCCTAGCTAGCTGCTCCATCAGTCCTTCCTTCCTCGTCGCTCCAATGGCGCA	A/G	0	8113	-1	31	3	93	78	4	0.893048	A	B	B	A	B	B	A	B	A	B	B	B	B	A	A	B	B	A	B	B	A	B	B	B	A	-	A	B	B	B	B	B	B	B	A	B
*synopGBS575	44.35	4B	TGCAGCTCATCTCCTAGCTAGCTGCTCCATCAGTCCTTCCTTCCTCGTCGCTCCAATGGCGCT	A/G	0	8114	-1	31	1	92	78	3	0.893048	A	B	B	A	B	B	A	B	A	B	B	B	B	A	A	B	B	A	B	B	A	B	B	B	A	-	A	B	B	B	B	B	B	B	A	B
*synopGBS174	46.79	4B	TGCAGAGAAAGAACCTTGGTAAAGAAACTGACATGAATGGCCACCCGCAAAAAAATTACACCA	C/T	0	1657	-1	14	3	90	74	4	0.855615	A	B	B	A	B	B	A	B	A	B	B	B	B	A	A	B	B	A	B	B	A	B	B	B	A	A	A	B	B	B	B	B	B	A	-	B
*synopGBS610	59.7	4B	TGCAGCTGCATGTTATCTTTCTATTTCACAGGGTTCCATGCGCCTGCCACTGGCTTTGGGTTT	C/T	0	8659	-1	35	1	76	96	10	0.86631	A	B	B	A	B	B	A	B	A	B	B	B	B	A	A	B	A	A	B	B	A	B	B	B	A	A	A	B	B	B	B	B	B	A	B	B
*synopGBS888	62.22	4B	TGCAGGGCAGCCCGTATTGGGCAGGAGCTCCTATACAGCGCTACAGGCGCCCGTTAACGATCC	C/T	0	11669	-1	38	3	88	76	8	0.834225	A	B	B	A	B	B	A	B	A	B	B	A	B	A	A	B	A	A	B	B	A	B	B	B	A	A	A	B	B	B	B	B	B	A	B	B
*synopGBS896	62.22	4B	TGCAGGGGAAGAAACTCATAAACAACCCCGACGGTACTCCCCGCGCCCATTCCCCTCCGTTTT	A/G	0	11823	-1	13	1	88	71	7	0.812834	A	B	B	A	B	B	A	B	A	B	B	A	B	A	A	B	A	A	B	B	A	B	B	B	A	A	A	B	B	B	B	B	B	A	B	B
*synopGBS103	64.07	4B	TGCAGACACCAATTTGTTCTCCTTAGGCTTGTCTCCACGGATCATTGGATGGATTCCGCCCCC	A/T	0	1025	-1	36	2	74	95	10	0.850267	A	B	B	A	B	B	A	B	A	B	B	A	B	A	A	B	A	A	B	B	A	B	B	B	A	A	A	B	B	B	B	B	B	A	B	B
*synopGBS115	64.07	4B	TGCAGACATGTGAGATTCGCGCGCGGGCGTCGGTGCCCTGTGGATGGAGGGGGTTCTCCCCGA	C/T	0	1133	-1	6	3	86	81	11	0.834225	A	B	B	A	B	B	A	B	A	B	B	A	B	A	A	B	A	A	B	B	A	B	B	B	A	A	A	B	B	B	B	B	B	A	B	B
*synopGBS118	64.89	4B	TGCAGACATTTCGACCAGTTTCAGTGATGGCAGTACTCATTCGTCAGCACCAGGACGATCTGT	T/G	0	1143	-1	60	3	99	89	10	0.951872	A	B	B	A	B	B	A	B	A	B	B	A	B	A	A	B	A	A	B	B	A	B	B	B	A	A	A	B	B	B	B	B	B	A	B	B
*synopGBS119	64.89	4B	TGCAGACATTTCGACCAGTTTCAGTGATGGTAGTACTCATTCGTCAGCACCAGGACGATCGGG	G/T	0	1144	-1	60	2	89	99	10	0.951872	A	B	B	A	B	B	A	B	A	B	B	A	B	A	A	B	A	A	B	B	A	B	B	B	A	A	A	B	B	B	B	B	B	A	B	B
*synopGBS181	64.89	4B	TGCAGAGAGACCACCTTGGCGTCAAACTCATGACTGCGCTGCACCAAGCCCTTTGTGCAAAAT	A/T	0	1748	-1	9	3	81	94	8	0.893048	A	B	B	A	B	B	A	B	A	B	B	A	B	A	A	B	A	A	B	B	A	B	B	B	A	A	A	B	B	B	B	B	B	A	B	B
*synopGBS227	64.89	4B	TGCAGATCCAGAGGTTAGCTATTCCTTGCAGCTTATATCATGGAACAGGACACCAAGTCATTG	A/G	0	2583	-1	46	3	89	73	7	0.828877	A	B	B	A	B	B	A	B	A	B	B	A	B	A	A	B	A	A	B	B	A	B	B	B	A	A	A	B	B	B	B	B	B	A	B	B
*synopGBS1006	65.7	4B	TGCAGGTTCGAATCCCAGCAACTCTCCTTTTTCGCGTTCGTCATTATTTCCACCTTGCACCGC	A/T	0	12905	-1	45	1	88	94	6	0.941176	A	B	B	A	B	B	A	B	A	B	B	A	B	A	A	B	A	A	B	B	A	B	B	B	A	A	A	B	B	B	B	B	B	A	B	B
*synopGBS1362	65.7	4B	TGCAGTTAGGGCAGATGATACTTTCAGGTTTTGTGGACTTTGTTTGCCTTAGCCTTACCCCTC	C/A	0	15558	-1	62	3	77	82	9	0.802139	A	B	B	A	B	B	A	B	A	B	B	A	B	A	A	B	A	A	B	B	A	B	B	B	A	A	A	B	B	B	B	B	B	A	B	B
*synopGBS336	65.7	4B	TGCAGCAAAGAACTTCTTGTACTTACACAGGCGCGTCACATAGCTTCGATCGTCATAGCTGCG	A/G	0	3501	-1	56	1	95	87	5	0.946524	A	B	B	A	B	B	A	B	A	B	B	A	B	A	A	B	A	A	B	B	A	B	B	B	A	A	A	B	B	B	B	B	B	A	B	B
*synopGBS523	65.7	4B	TGCAGCTAACTAGCCTGAGATAATGCCAGCAACTCTGCTCGGTAGCTTTCTTAAGAAGGCCTT	C/T	0	7696	-1	45	1	90	82	12	0.855615	A	B	B	A	B	B	A	B	A	B	B	A	B	A	A	B	A	A	B	B	A	B	B	B	A	A	A	B	B	B	B	B	B	A	B	B
*synopGBS677	65.7	4B	TGCAGGAACTGGTCTTGGACCTCGTGACGGAGCTGCTCGGGCACTCCGAGCGGGAAGCGCAGG	C/G	0	9602	-1	20	3	79	80	6	0.818182	A	B	B	A	B	B	A	B	A	B	B	A	B	A	A	B	A	A	B	B	A	B	B	B	A	A	A	B	B	B	B	B	B	A	B	B
*synopGBS778	65.7	4B	TGCAGGCAGAAGGGGTTAGCTGAACCATCTTTCAAAGAGGCGAGCTGAGTTCGAATCATTGTT	C/T	0	10569	-1	6	3	71	88	6	0.818182	A	B	B	A	B	B	A	B	A	B	B	A	B	A	A	B	A	A	B	B	A	B	B	B	A	A	A	B	B	B	B	B	B	A	B	B
*synopGBS782	65.7	4B	TGCAGGCAGCACGAAGCACAAAAAACTCTCTCGAGTCCCTCTCTAGTCCCTGACTAACAATTC	A/C	0	10604	-1	13	3	89	74	8	0.828877	A	B	B	A	B	B	A	B	A	B	B	A	B	A	A	B	A	A	B	B	A	B	B	B	A	A	A	B	B	B	B	B	B	A	B	B
*synopGBS799	65.7	4B	TGCAGGCCACCTACGTCGCTCTCTACCTCGCCTATGCCCCCAGGGACACCAAGGTGCGTCCAT	C/T	0	10740	-1	6	1	71	90	9	0.812834	A	B	B	A	B	B	A	B	A	B	B	A	B	A	A	B	A	A	B	B	A	B	B	B	A	A	A	B	B	B	B	B	B	A	B	B
*synopGBS834	65.7	4B	TGCAGGCTATGGGATCTTCTTAGAAACAAACCCTGCATTTTCAACCTTGCCGCTACTTGTATC	A/G	0	11283	-1	8	3	84	79	6	0.839572	A	B	B	A	B	B	A	B	A	B	B	A	B	A	A	B	A	A	B	B	A	B	B	B	A	A	A	B	B	B	B	B	B	A	B	B
*synopGBS932	65.7	4B	TGCAGGTACCTGAACATCCTGTAGGCGTTCGTCGCGTGGCCGAACCTGAAGAGCCCATCCAGG	A/G	0	12166	-1	56	2	90	72	7	0.828877	A	B	B	A	B	B	A	B	A	B	B	A	B	A	A	B	A	A	B	B	A	B	B	B	A	A	A	B	B	B	B	B	B	A	B	B
*synopGBS1384	66.57	4B	TGCAGTTCATAACATTGTTCAAACAGAGAACAGCGGCAGAACACATATAAACCCAACCGAGCA	A/G	0	15706	-1	11	2	98	73	7	0.877005	A	B	B	A	B	B	A	B	A	B	B	A	B	A	A	B	A	A	B	B	A	B	B	B	A	A	A	B	B	B	B	B	B	A	B	B
*synopGBS1465	66.57	4B	TGCAGTTTAGACCCAATCAAAAGGCTAGATTTCATGAAAAGAATAGCAAGGAGAGGGGCTCAC	A/G	0	16311	-1	36	3	87	84	8	0.871658	A	B	B	A	B	B	A	B	A	B	B	A	B	A	A	B	A	A	B	B	A	B	B	B	A	A	A	B	B	B	B	B	B	A	B	B
*synopGBS1490	66.57	4B	TGCAGTTTTTTCCGCGAGACATTTTTCCTTCCTCAGCGCATGGTGGGCCAGCCCATGAGGGGC	A/G	0	16673	-1	39	3	89	84	9	0.877005	A	B	B	A	B	B	A	B	A	B	B	A	B	A	A	B	A	A	B	B	A	B	B	B	A	A	A	B	B	B	B	B	B	A	B	B
*synopGBS1491	66.57	4B	TGCAGTTTTTTCCGCGAGACATTTTTCCTTCCTCAGCGCATGGTGGGCCAGCCCATGAGGGGC	C/T	0	16674	-1	62	3	90	82	8	0.877005	A	B	B	A	B	B	A	B	A	B	B	A	B	A	A	B	A	A	B	B	A	B	B	B	A	A	A	B	B	B	B	B	B	A	B	B
*synopGBS1364	67.46	4B	TGCAGTTAGTGCAGATGATACTTTCAGGTTTTGTGGACTTTGTTTGCCTTAGCCTTACCCCTA	A/C	0	15564	-1	62	1	82	77	9	0.802139	A	B	B	A	B	-	A	B	A	B	B	A	B	A	A	B	A	A	B	B	A	B	B	B	A	A	A	B	B	B	B	B	B	A	B	B
*synopGBS1078	71.27	4B	TGCAGTACGAATACGGAGGGGACAGCATGTAACTGACCAAACAGACACGGCGCCTGACCCGTG	A/G	0	13372	-1	21	3	78	90	8	0.855615	A	B	B	A	B	A	A	B	A	B	B	A	B	A	A	B	A	A	B	B	A	B	B	B	A	A	A	B	B	B	B	B	B	A	B	B
*synopGBS22	71.27	4B	TGCAGAAAGGGACCACTCATTCGTACATCACTCCAACTGATGTATGAAGGTTGTTCATGGCGA	A/G	0	206	-1	18	3	80	90	7	0.871658	A	B	B	A	B	A	A	B	A	B	B	A	B	A	A	B	A	A	B	B	A	B	B	B	A	A	A	B	B	B	B	B	B	A	B	B
*synopGBS335	71.27	4B	TGCAGCAAAGAAAGGAGAGCACGAGGGGGTGGCCCAGGCCCTTACCGTGAACAGCTCGCCGAG	A/G	0	3494	-1	20	3	90	79	5	0.877005	A	B	B	A	B	A	A	B	A	B	B	A	B	A	A	B	A	A	B	B	A	B	B	B	A	A	A	B	B	B	B	B	B	A	B	B
*synopGBS199	73.82	4B	TGCAGAGGAAAGCGTCCGTGCCATGCCATAGGGGGCTTGCAAGACAAGCCTTGCGAAGCTACA	C/T	0	1991	-1	39	3	88	83	3	0.898396	A	B	B	A	B	A	A	B	A	B	B	A	B	A	A	B	A	A	B	B	A	B	B	B	A	A	A	B	B	B	B	B	B	A	B	B
*synopGBS1317	74.63	4B	TGCAGTGGGCGCACGGATCCCTCAACGCGCTCTCCTGGGGCCTCCTGCTCCCCGTGGGCGCGG	A/C	0	15184	-1	16	3	80	76	5	0.807487	A	B	B	A	B	A	A	B	A	B	B	A	B	A	A	B	A	A	B	B	A	B	B	B	A	A	A	B	B	B	B	B	B	A	B	B
*synopGBS1340	74.63	4B	TGCAGTGTGTTGCCTACTTTGCGTGTAAACAGTACATCTACTCAAATGCATTGATGTTTGTTT	A/G	0	15402	-1	39	3	97	77	7	0.893048	A	B	B	A	B	A	A	B	A	B	B	A	B	A	A	B	A	A	B	B	A	B	B	B	A	A	A	B	B	B	B	B	B	A	B	B
*synopGBS299	74.63	4B	TGCAGATGTCGGCCCCTCATCTTGTCTCCGACCCCAAGGGCGTCAAGCGCGCGGAAGGCGTTG	C/T	0	3104	-1	14	3	74	81	3	0.812834	A	B	B	A	B	A	A	B	A	B	B	A	B	A	A	B	A	A	B	B	A	B	B	B	A	A	A	B	B	B	B	B	B	A	B	B
*synopGBS522	74.63	4B	TGCAGCTAACGATCGCATTCGTATCCTCTTGAAATGAAAATCAGCTCTTGGCTTGCTTCCGAC	C/T	0	7691	-1	15	3	97	71	5	0.871658	A	B	B	A	B	A	A	B	A	B	B	A	B	A	A	B	A	A	B	B	A	B	B	B	A	A	A	B	B	B	B	B	B	A	B	B
*synopGBS631	74.63	4B	TGCAGCTTCAGAGCTTTTTTGCTTGATGTTATCTAGCAACTTGTCCTGAGAAAGATCTTTTCC	G/T	0	9100	-1	49	3	78	81	4	0.828877	A	B	B	A	B	A	A	B	A	B	B	A	B	A	A	B	A	A	B	B	A	B	B	B	A	A	A	B	B	B	B	B	B	A	B	B
*synopGBS882	75.48	4B	TGCAGGGATGGGCGGCCTGGGCGTAGAGGAGACGGCGCTGGTGTCGGCCCTGGGGCGGGGGAG	A/G	0	11625	-1	24	2	75	84	3	0.834225	A	B	B	A	B	A	A	B	A	B	B	A	B	A	A	B	A	A	B	B	A	B	B	B	A	A	A	B	B	B	B	B	B	A	B	B
*synopGBS238	79.25	4B	TGCAGATCGAAGCTAACGACGCAGCAAGGCGGACGGTGCGAGGACGCAGCAAGGAAATTCCAT	C/T	0	2680	-1	29	3	78	84	7	0.828877	A	B	B	A	A	A	A	B	A	B	B	A	B	A	A	B	A	A	B	B	A	B	B	B	A	A	A	B	B	B	B	B	B	A	B	B
*synopGBS339	79.25	4B	TGCAGCAACTGATCCAGATCTGATCCGTTGTCGGAGGAGAGGCGCGATGTAGATGACGAACGA	C/T	0	3643	-1	13	2	85	75	10	0.802139	A	B	B	A	A	A	A	B	A	B	B	A	B	A	A	B	A	A	B	B	A	B	B	B	A	A	A	B	B	B	B	B	B	A	B	B
*synopGBS780	79.25	4B	TGCAGGCAGATGAGAGGAGAGGAGCTCCACAGCTTGAACGTCCAGCAGCTTCAGGCCCTAGAG	C/G	0	10600	-1	29	1	84	89	6	0.893048	A	B	B	A	A	A	A	B	A	B	B	A	B	A	A	B	A	A	B	B	A	B	B	B	A	A	A	B	B	B	B	B	B	A	B	B
*synopGBS554	80.12	4B	TGCAGCTAGTCAACGGCCGTCTCTGCACGCATGTGCACATCTCAAGAGGCCACTGTGTGCAGC	C/T	0	7914	-1	52	2	81	82	8	0.828877	A	B	B	A	A	A	A	B	A	B	B	A	B	A	A	B	A	A	B	B	A	B	B	B	A	A	A	B	B	B	B	B	B	A	B	B
*synopGBS566	80.12	4B	TGCAGCTATGGAGATTCTCGGGAAGATGCTGTTCATAGTTAGTTAGGTATAAGGGTAAGCAAC	A/C	0	7985	-1	34	3	77	84	6	0.828877	A	B	B	A	A	A	A	B	A	B	B	A	B	A	A	B	A	A	B	B	A	B	B	B	A	A	A	B	B	B	B	B	B	A	B	B
*synopGBS1332	80.97	4B	TGCAGTGTCCGCGTCGACAACCACATCGCTGGCTTTGGCTTCAACAACCACAGGGGATGGAGA	A/G	0	15327	-1	49	2	86	82	7	0.860963	A	B	B	A	A	A	A	B	A	B	B	A	B	A	A	B	A	A	B	B	A	B	A	B	A	A	A	B	B	B	B	B	B	A	-	B
*synopGBS424	82.5	4B	TGCAGCCACTGCTCGATGGACGCGCGCTCCAGCGACCCCGTGCCGTAGATCCCGCGGGTGCCG	G/T	0	5376	-1	14	3	88	85	7	0.887701	A	B	B	A	A	A	A	B	A	B	B	A	B	A	A	B	A	A	B	B	B	B	A	B	A	A	A	B	B	B	B	B	B	A	-	B
*synopGBS425	82.5	4B	TGCAGCCACTGCTCGATGGACGCGCGCTCCAGCGACCCCGTGCCGTAGATCCCGCGGGTGCCG	G/C	0	5377	-1	23	3	88	85	7	0.887701	A	B	B	A	A	A	A	B	A	B	B	A	B	A	A	B	A	A	B	B	B	B	A	B	A	A	A	B	B	B	B	B	B	A	-	B
*synopGBS1357	86.62	4B	TGCAGTTAGAATAGGCCCAGGGCCTGAATGTTGTTTGAACTTATGTGTACTTGACCGTGTTTG	T/C	0	15533	-1	59	3	85	84	7	0.86631	A	B	B	A	A	A	B	B	A	B	B	A	B	A	A	B	A	A	B	B	B	B	A	B	A	A	A	B	B	B	B	B	B	A	-	B
*synopGBS1358	86.62	4B	TGCAGTTAGAATAGGTCCAGGGCCTGAATGTTGTTTGAACTTATGTGTACTTGACCGTGCTTG	C/T	0	15534	-1	59	1	84	85	7	0.86631	A	B	B	A	A	A	B	B	A	B	B	A	B	A	A	B	A	A	B	B	B	B	A	B	A	A	A	B	B	B	B	B	B	A	-	B
*synopGBS53	86.62	4B	TGCAGAAGATTGGGTCGTCGCTGCTGAAGATTGGGTCGTTGGGGGCGTAGTCGTTGTGGTGGG	T/C	0	596	-1	50	3	86	86	6	0.887701	A	B	B	A	A	A	B	B	A	B	B	A	B	A	A	B	A	A	B	B	B	B	A	B	A	A	A	B	B	B	B	B	B	A	-	B
*synopGBS123	87.52	4B	TGCAGACCCATCGAAACCAGGTTGGGTTGTTTCACTACCACATGGGTTTTTGCCGCGGTACGC	A/T	0	1217	-1	18	3	86	72	3	0.828877	A	B	B	A	A	A	B	B	A	B	B	A	B	A	A	B	A	A	B	B	B	B	A	B	A	A	A	B	B	B	B	B	B	A	-	B
*synopGBS187	87.52	4B	TGCAGAGCAAAGCTTGCAAGTCCAACCTTTATCATCGCTGGCCCATTGAACGGGCAGAACACC	A/G	0	1841	-1	33	3	80	91	13	0.84492	A	B	B	A	A	A	B	B	A	B	B	A	B	A	A	-	A	A	B	B	B	B	A	B	A	A	A	B	B	B	B	B	B	A	A	B
*synopGBS991	94.55	4B	TGCAGGTTCAAAGACAACGACGAGCTTGTCGAGATCACGCTTGATGTGCAACGCGATTCAGCG	C/T	0	12861	-1	53	1	83	92	9	0.887701	A	B	B	A	A	A	B	B	A	B	B	A	B	A	A	A	A	A	B	B	B	B	A	A	A	A	-	B	B	B	B	B	B	A	A	B
*synopGBS1276	105.52	4B	TGCAGTGCATCCTACACCATACGCAAACCAGCTAGCTAGCTTAATCCTCCGCATGATGTGCCT	G/T	0	14860	-1	59	3	102	74	4	0.919786	A	B	B	A	B	A	B	B	A	B	B	A	B	-	A	A	A	A	B	A	B	B	A	B	A	A	B	B	B	B	B	B	B	B	A	B
*synopGBS654	130.73	4B	TGCAGCTTTCCCCGTTAGAAACCAGCCTGCCATGCCAAACTCTAACGACGTACAATCATCACA	A/G	0	9380	-1	38	3	88	75	6	0.839572	A	B	B	A	B	A	B	B	A	A	B	A	B	-	A	A	A	-	B	B	-	B	A	-	B	A	B	B	B	B	A	B	B	B	A	-
*synopGBS536	0	4D	TGCAGCTACGTACGTCTAGAAAACATGCGTGTACAACACCTGTCTGGCTATGGATTCACCAAG	A/T	0	7791	-1	37	3	91	81	6	0.887701	A	B	A	B	A	B	-	B	-	B	-	A	B	A	B	A	A	A	B	A	-	B	B	B	B	B	A	A	A	A	A	A	B	A	B	A
*synopGBS838	0	4D	TGCAGGCTATTTACGCCGACTGGACATTACGGTGAACAGAGGGCGGCGTTCGGGGTTGCAAGC	C/G	0	11288	-1	29	3	90	75	5	0.855615	A	B	A	B	A	B	B	B	-	-	A	A	B	A	B	A	A	A	B	A	A	B	B	B	B	B	A	A	A	A	A	A	B	A	B	A
*synopGBS570	5.31	4D	TGCAGCTCAAGGGGCACAGGTCGGTCGGCGGCGTCCGCGCCTCCATCTACAACGCCATGCCAC	A/G	0	8041	-1	61	1	78	90	8	0.855615	A	B	A	B	A	B	A	B	-	A	A	A	B	A	B	-	A	A	B	A	A	B	B	B	B	B	A	A	A	A	A	A	B	A	B	A
*synopGBS186	6.17	4D	TGCAGAGAGGGAGAAAGCATCTGGATCTCTGTGTCACCGAGGTTTGAAAGGCGGAGGGAATCA	C/G	0	1772	-1	34	3	71	85	3	0.818182	A	B	A	B	A	B	A	B	B	A	A	A	B	A	B	-	A	A	B	A	A	B	B	B	B	B	A	A	A	A	A	A	A	A	B	A
*synopGBS217	7.92	4D	TGCAGATATGAATGAATGAACGAATGAATGGATCTTCTGCGCTGGAGCTGTATATCTATACTG	C/T	0	2438	-1	36	3	77	88	5	0.855615	A	B	A	B	A	B	-	B	B	A	A	A	B	A	B	B	A	A	B	A	A	B	B	B	B	B	A	A	A	A	A	A	A	A	B	A
*synopGBS519	7.92	4D	TGCAGCTAAACCCCAAACAAAGCATACGGGGCAACGGACGGTACAGAGACAGAGGACAGGGGA	A/G	0	7676	-1	55	2	85	83	14	0.823529	A	B	A	B	A	B	-	B	B	A	A	A	B	A	B	B	A	A	B	A	A	B	B	B	B	B	A	A	A	A	A	A	A	A	B	A
*synopGBS990	7.92	4D	TGCAGGTTCAAAAAATCCGAATGTTCGGCAGTTATCGTTCCCGTAAACATTTGATGCCGTTCG	A/G	0	12860	-1	10	3	79	83	6	0.834225	A	B	A	B	A	B	B	B	B	A	A	A	B	A	B	B	A	A	B	A	A	B	B	B	B	B	A	A	A	A	A	A	A	A	B	A
*synopGBS807	8.81	4D	TGCAGGCCCATTAAGCGACACGTCGCTGGTCTGCTTAGCACTCCTTTACGCTGACGCAGGGAC	G/C	0	10817	-1	32	3	78	88	4	0.86631	A	B	A	B	A	B	B	B	B	A	A	A	B	A	B	A	A	A	B	A	A	B	B	B	B	B	A	A	A	A	A	A	A	A	B	A
*synopGBS808	8.81	4D	TGCAGGCCCATTAAGCGACACGTCGCTGGTCTGCTTAGCACTCCTTTACGCTGACGCAGGGAC	A/T	0	10818	-1	57	3	78	88	4	0.86631	A	B	A	B	A	B	B	B	B	A	A	A	B	A	B	A	A	A	B	A	A	B	B	B	B	B	A	A	A	A	A	A	A	A	B	A
*synopGBS1075	11.6	4D	TGCAGTACCTGAATGTTAGCCATAATGTGCTGTCAGGGCCAGTATTTGAGAGCGATCCGACGC	C/T	0	13365	-1	29	3	80	86	8	0.84492	A	B	A	B	A	B	B	B	B	A	A	A	B	A	B	A	A	A	B	A	A	A	B	B	B	B	A	A	A	A	A	A	A	A	B	A
*synopGBS1076	11.6	4D	TGCAGTACCTGAATGTTAGCCATAATGTGCTGTCAGGGCCAGTCTTTGCGAGCGATCCGACGC	C/T	0	13366	-1	29	1	76	86	4	0.84492	A	B	A	B	A	B	B	B	B	A	A	A	B	A	B	A	A	A	B	A	A	A	B	B	B	B	A	A	A	A	A	A	A	A	B	A
*synopGBS1263	11.6	4D	TGCAGTGCAACGTGCAGCGCCAGATATGCTCGCCTCGGCTTCGAGTGCTTGGATAGAAGAGGA	A/G	0	14777	-1	43	3	93	61	3	0.807487	A	B	A	B	A	B	B	B	B	A	A	A	B	A	B	A	A	A	B	A	A	A	B	B	B	B	A	A	A	A	A	A	A	A	B	A
*synopGBS735	15.72	4D	TGCAGGATCAAGCCCTCTTCGCTGCCAACACGGCGGGCACCATCAGGGACGGCAAGACGGCGT	C/G	0	10272	-1	19	2	106	58	14	0.802139	A	B	A	B	A	B	A	B	B	A	A	A	B	B	B	B	A	A	B	A	A	-	B	-	B	B	A	A	A	A	A	A	-	A	B	A
*synopGBS1213	22.88	4D	TGCAGTCTAGAATGATCAAGTCAAAGCTGATCGGGCTGAACCACATGTGGCAAGCGGGATCCT	C/T	0	14437	-1	26	3	74	92	5	0.860963	A	B	A	A	A	B	A	B	B	A	A	A	B	B	A	B	A	A	B	A	A	B	B	A	B	B	B	-	A	A	A	A	B	B	B	A
*synopGBS1214	22.88	4D	TGCAGTCTAGAATGATCAAGTCAAAGCTGATCGGGCTGAACCACATGTGGCAAGCGGGATCCT	G/C	0	14438	-1	37	3	74	92	5	0.860963	A	B	A	A	A	B	A	B	B	A	A	A	B	B	A	B	A	A	B	A	A	B	B	A	B	B	B	-	A	A	A	A	B	B	B	A
*synopGBS527	57.96	4D	TGCAGCTAATCGTGCATCACTGAATTTGGTGCAGGCCAGACTTGCAGGCTTATGCAGAGAGCA	C/T	0	7717	-1	10	3	46	129	8	0.893048	A	B	A	A	A	B	A	A	B	A	A	A	A	A	A	B	A	A	B	A	A	B	B	A	A	B	A	B	A	A	A	A	B	-	B	A
*synopGBS534	57.96	4D	TGCAGCTACGAATTGCAGCCGAGGACCTCTCCACATTCCAACCGTCGCATCATCTTCTTCTCC	C/T	0	7768	-1	37	3	126	42	3	0.882353	A	B	A	A	A	B	A	A	B	A	A	A	A	A	A	B	A	A	B	A	A	B	B	A	A	B	A	B	A	A	A	A	B	A	B	A
*synopGBS877	58.79	4D	TGCAGGGAGGGGACGACGCCACTTCAACCGAGCGCGCGTACGTTCGTGTCGTGCTTCAGTGTG	G/T	0	11583	-1	62	3	117	40	2	0.828877	A	B	A	A	A	B	A	A	B	A	A	A	A	A	A	B	A	A	B	A	A	B	B	A	A	B	A	B	A	A	A	A	B	A	B	A
*synopGBS878	58.79	4D	TGCAGGGAGGGGACGACGCCACTTCAACCGAGCGCGCGTACGTTCGTGTCGTGCTTCAGTGTG	A/C	0	11584	-1	63	3	117	40	2	0.828877	A	B	A	A	A	B	A	A	B	A	A	A	A	A	A	B	A	A	B	A	A	B	B	A	A	B	A	B	A	A	A	A	B	A	B	A
*synopGBS1049	59.67	4D	TGCAGTAAACTTTAGACGCCATTTACCATTTAACCATAGCACCCCAGATCATGACATGGCATC	A/C	0	13135	-1	53	3	46	118	5	0.850267	A	B	A	A	A	B	A	A	B	A	A	A	A	A	A	B	A	A	B	A	A	B	B	A	A	B	A	B	A	A	A	A	B	A	B	A
*synopGBS290	59.67	4D	TGCAGATGGAGCAGCAGACCCACCAGCCGCAGGTGATGATGATGCAGCAGCAGAGCCCGCCGA	C/T	0	3020	-1	22	3	40	121	2	0.850267	A	B	A	A	A	B	A	A	B	A	A	A	A	A	A	B	A	A	B	A	A	B	B	A	A	B	A	B	A	A	A	A	B	A	B	A
*synopGBS1160	61.42	4D	TGCAGTCAGGCAGCGCCCTCCCGTCTCGACCCAGTTCGGCCCGTAGCAGCGCAGCAGGAGGAG	C/T	0	13966	-1	16	3	46	118	6	0.84492	A	B	A	A	A	B	A	A	B	A	A	A	A	A	A	B	A	A	B	A	A	B	B	A	A	B	A	B	A	A	A	A	B	A	B	A
*synopGBS1178	66.83	4D	TGCAGTCCTACCAGGGCAGTACCACCACCATGTACTTACTGCTAAATCCGAGTGCAGTCAGTG	T/C	0	14199	-1	35	3	133	33	4	0.86631	A	B	A	A	A	B	A	-	B	A	A	A	A	A	A	B	A	A	B	A	A	A	A	A	A	B	A	B	A	A	A	A	B	A	B	A
*synopGBS1179	66.83	4D	TGCAGTCCTACCAGGTCAGTACCACCACCATGTACCTACTGCTAAATCCGAGTGCAGTCAGTG	C/T	0	14200	-1	35	1	33	133	4	0.86631	A	B	A	A	A	B	A	-	B	A	A	A	A	A	A	B	A	A	B	A	A	A	A	A	A	B	A	B	A	A	A	A	B	A	B	A
*synopGBS1285	66.83	4D	TGCAGTGCCTCACCATGCAGCTCGTGGAGGCTTGCTTCACCAACGCGTCTGCCATTATTTTGG	C/T	0	14925	-1	8	3	129	31	5	0.828877	A	B	A	A	A	B	A	-	B	A	A	A	-	A	A	B	A	A	B	A	A	A	A	A	A	B	A	B	A	A	A	A	B	A	-	A
*synopGBS1376	66.83	4D	TGCAGTTCAACAGCGTAGTAAAGAAGACGGCGATCGATGGACGTGGACTATGCATGCATGCAT	A/G	0	15655	-1	53	3	125	31	5	0.807487	A	B	-	A	A	B	A	-	B	A	A	-	-	A	A	-	A	A	B	-	A	A	-	A	A	B	A	-	A	A	A	A	B	A	-	-
*synopGBS101	0	5A	TGCAGACACCAACCATAATTTTTTCTTCAGCAATGCCAATGAGGAAATAACGATCGATGATGC	A/T	0	1023	-1	17	1	83	85	10	0.84492	A	B	-	A	-	B	-	B	A	A	-	A	A	-	A	A	A	A	B	-	B	B	A	A	B	B	A	-	B	A	B	A	A	-	B	-
*synopGBS1102	1.84	5A	TGCAGTAGATGTGTAGGGTGGCCGCTGATCACGAGAGCACTGAGCGGCCGCAAGCATGCAGCG	C/T	0	13518	-1	39	3	83	80	6	0.839572	A	B	B	A	A	B	-	B	A	A	B	A	A	A	A	A	A	A	B	B	B	B	A	A	B	B	A	A	B	A	B	A	A	B	B	A
*synopGBS258	1.84	5A	TGCAGATCGTGGAGGCGGCTGGGTAATAGGAGGGTGGGCAAGGACCTGTGCGTGAGTTTGCCT	A/G	0	2752	-1	25	3	89	81	5	0.882353	A	B	B	A	A	B	A	B	A	A	B	A	A	A	A	A	A	A	B	B	B	B	A	A	B	B	A	A	B	A	B	A	A	B	B	A
*synopGBS966	6.97	5A	TGCAGGTCGAGACCACCACCAGTTGCAGGTCGACATCAGAGGGATGGGGAGGCGATGGGTGGC	A/G	0	12436	-1	34	3	78	80	4	0.823529	A	B	B	A	A	B	A	B	A	A	B	A	A	A	A	A	A	A	B	B	A	B	A	A	B	A	A	A	B	A	B	A	A	B	B	A
*synopGBS330	12.19	5A	TGCAGCAAAAAGGGCATGGTCTTGATCTGTAGCGAAAGGGGCAAGGGTTCGATCTGCACCAAT	C/T	0	3445	-1	20	2	89	81	5	0.882353	A	B	B	A	A	B	A	B	A	A	B	A	A	A	A	A	A	A	A	B	A	B	A	A	B	A	B	A	B	A	B	A	A	-	B	A
*synopGBS403	12.99	5A	TGCAGCATTTTAATTAAATCGACATCTGAATTCAGTTACCATCTGGATGCCAAGGACGCTTCT	C/G	0	5115	-1	63	3	78	84	2	0.855615	A	B	B	A	A	B	A	B	A	A	B	A	A	A	A	A	A	A	A	B	A	B	A	A	B	A	B	A	B	A	B	A	A	-	B	A
*synopGBS1009	14.67	5A	TGCAGGTTCTTCACCAGAGAGCAAGATCAAGATCTTCTACGACACCTGCGAAAAGAAGGTCAT	A/T	0	12932	-1	38	3	90	76	6	0.855615	A	B	B	A	A	B	A	B	A	A	B	A	A	A	A	A	A	A	A	B	A	B	A	A	B	A	B	A	B	A	B	A	B	-	B	A
*synopGBS814	20.99	5A	TGCAGGCCGAGCAGTCCTTCGCCGAGATCCTCGCCAACACCTCACCCACCGCTGACCAGGAGT	C/T	0	10874	-1	19	3	73	85	3	0.828877	A	B	B	A	A	B	A	B	A	A	B	A	A	A	A	A	A	A	A	B	A	B	A	B	B	A	A	A	B	A	B	A	B	A	B	A
*synopGBS1240	23.66	5A	TGCAGTGAAAGGCAATTCGCCCTCCCTTAAATTGTTTATGTTAGTCCACCAAAGCGACCAGAA	C/T	0	14595	-1	19	3	86	77	7	0.834225	A	B	A	A	A	B	A	B	A	A	B	A	A	A	A	A	A	A	A	B	A	B	A	B	B	A	A	A	B	A	B	B	B	A	B	A
*synopGBS642	23.66	5A	TGCAGCTTCTCTCTTGTCCCGTCCCCGTCGTCGGCGTGCGCGCGTGCGGCGACGCAGGGCCCA	C/T	0	9209	-1	31	3	85	91	7	0.903743	A	B	A	A	A	B	A	B	A	A	B	A	A	A	A	A	A	A	A	B	A	B	A	B	B	A	A	A	B	A	B	B	B	A	B	A
*synopGBS23	32.18	5A	TGCAGAAATCAAATACCCAGTTAGTTCCTCCTGAATCTACATTCTACAGCCTCCATGAACAAT	C/T	0	242	-1	29	3	79	78	6	0.807487	A	B	A	A	A	B	A	B	A	A	B	A	A	A	B	A	A	A	A	B	A	B	A	B	B	A	A	A	B	A	B	B	B	A	B	A
*synopGBS36	32.18	5A	TGCAGAACATATTCTCCTGTAGAACAATGGAATGGAACGGCTAATCGAAGACGCAAGATGGTG	A/C	0	393	-1	31	3	80	76	3	0.818182	A	B	A	A	A	B	A	B	A	A	B	A	A	A	B	A	A	A	A	B	A	B	A	B	B	A	A	A	B	A	B	B	B	A	B	A
*synopGBS37	32.18	5A	TGCAGAACATATTCTCCTGTAGAACAATGGAATGGAACGGCTAATCGAAGACGCAAGATGGTG	G/T	0	394	-1	33	3	80	76	3	0.818182	A	B	A	A	A	B	A	B	A	A	B	A	A	A	B	A	A	A	A	B	A	B	A	B	B	A	A	A	B	A	B	B	B	A	B	A
*synopGBS850	32.18	5A	TGCAGGCTGTCCTCGGCCGAAGAAGAACTAGAGATCAACATGGGATTGACGCACTCCAGTAGC	C/T	0	11400	-1	16	3	83	80	3	0.855615	A	B	A	A	A	B	A	-	A	A	B	A	A	A	B	A	A	A	A	B	A	B	A	B	B	A	A	A	B	A	B	B	B	A	B	A
*synopGBS851	32.18	5A	TGCAGGCTGTCCTCGGCCGAAGAAGAACTAGAGATCAACATGGGATTGACGCACTCCAGTAGC	A/G	0	11401	-1	19	3	83	80	3	0.855615	A	B	A	A	A	B	A	-	A	A	B	A	A	A	B	A	A	A	A	B	A	B	A	B	B	A	A	A	B	A	B	B	B	A	B	A
*synopGBS826	47.59	5A	TGCAGGCGCACTCTGCCGTATGCGTCGATGTTCCGTTGTGATATCAGGAAGAGCTCCACCTCT	C/T	0	11042	-1	16	3	82	78	6	0.823529	A	B	A	A	A	B	A	A	A	A	B	A	A	A	B	B	A	B	B	B	A	B	A	B	B	A	A	A	B	A	B	B	B	A	B	A
*synopGBS1249	53.85	5A	TGCAGTGACAGCTCGGTCCTTCCACCCCGAGCGAAGATCGATCAATGGCTAATGCTAGTAGTA	C/T	0	14651	-1	24	3	91	83	6	0.898396	A	B	A	A	A	B	A	A	A	A	B	A	A	A	B	B	A	B	A	B	A	B	A	B	B	B	A	A	B	A	B	B	B	A	B	B
*synopGBS499	53.85	5A	TGCAGCCTTTCTTGTCCTGCTCTGCCTCGCGCTGGTGGCACACGCCATTGCAGCTGCCAGGAC	A/G	0	6659	-1	46	3	80	93	7	0.887701	A	B	A	A	A	B	A	A	A	A	B	A	A	A	B	B	A	B	A	B	A	B	A	B	B	B	A	A	B	A	B	B	B	A	B	B
*synopGBS532	53.85	5A	TGCAGCTACCGATTATAACCTAACCAGCCGCATTAAACGAGATGATTAGCTATGGATCAGATC	C/T	0	7756	-1	8	3	75	84	5	0.823529	A	B	A	A	A	B	A	A	A	A	B	A	A	A	B	B	A	B	A	B	A	B	A	B	B	B	A	A	B	A	B	B	B	A	B	B
*synopGBS293	58.2	5A	TGCAGATGGCGCGGACGTGCGTGCTGTCCACGAGGGGGAGGCACCTCTGGCGCACCGTGCCGT	A/G	0	3035	-1	53	3	87	80	8	0.850267	A	B	A	A	A	A	A	A	A	A	B	A	A	A	B	B	A	B	A	A	A	B	A	B	B	B	A	A	B	A	B	B	B	A	A	B
*synopGBS1405	69.67	5A	TGCAGTTCGAAAGAGAGGAACCTTGCACTAGGTGGCCATCGACGACCTGGAAAAGATCTGCAT	T/C	0	15833	-1	32	3	73	89	7	0.828877	A	B	A	A	A	A	A	A	A	A	B	A	-	A	B	B	A	B	A	A	A	B	A	B	B	B	A	A	B	B	B	B	B	A	A	B
*synopGBS539	69.67	5A	TGCAGCTAGATCTACTTACTTGACATGATCGAAGCTAATACGTGGATTGATCACCTTTTGTAT	A/C	0	7820	-1	9	3	64	94	7	0.807487	A	B	A	A	A	A	A	A	A	A	B	A	B	A	B	B	A	B	A	A	A	B	A	B	B	B	A	A	B	B	B	-	B	A	A	B
*synopGBS540	69.67	5A	TGCAGCTAGATCTACTTACTTGACATGATCGAAGCTAATACGTGGATTGATCACCTTTTGTAT	A/G	0	7821	-1	13	3	68	88	5	0.807487	A	B	A	A	A	A	A	A	A	A	B	A	B	A	B	B	A	B	A	A	A	B	A	B	B	B	A	A	B	B	B	-	B	A	A	B
*synopGBS541	69.67	5A	TGCAGCTAGATCTACTTACTTGACATGATCGAAGCTAATACGTGGATTGATCACCTTTTGTAT	A/G	0	7822	-1	27	3	68	94	11	0.807487	A	B	A	A	A	A	A	A	A	A	B	A	B	A	B	B	A	B	A	A	A	B	A	B	B	B	A	A	B	B	B	-	B	A	A	B
*synopGBS746	72.28	5A	TGCAGGATGAGTAGATGATTGCCCCATCGCAATCTCGTAGGATCATACTGGCACCTCCCGTTC	C/G	0	10341	-1	22	3	86	75	4	0.839572	A	B	A	A	A	A	A	A	A	A	B	A	B	A	B	B	A	B	A	A	A	B	A	B	B	B	A	A	B	B	B	A	B	A	A	B
*synopGBS1008	73.06	5A	TGCAGGTTCTGCAACGATGCCATGGCCGCGCCCTTCGCCATGGACATGCGGGATGGGGCCGAG	A/G	0	12925	-1	45	1	97	86	10	0.925134	A	B	A	A	A	A	A	A	A	A	B	A	B	A	A	B	A	B	A	A	A	B	A	B	B	B	A	A	B	B	B	A	B	A	A	B
*synopGBS294	73.06	5A	TGCAGATGGCTACCCTGCAAGTTGCACTGCCCGTTTCGCAATCCCGTGTCGACAGTCTGTCGA	C/T	0	3038	-1	56	3	78	102	9	0.914439	A	B	A	A	A	A	A	A	A	A	B	A	B	A	A	B	A	B	A	A	A	B	A	B	B	B	A	A	B	B	B	-	B	A	A	B
*synopGBS1046	79.85	5A	TGCAGTAAAAATTAATCTTATTCGGATTCGACGGCGCGGCAGCGGCAGGAGCTCGGCACTCTG	A/C	0	13112	-1	40	3	80	82	2	0.855615	A	B	A	A	A	A	A	A	A	A	B	A	B	A	A	B	A	B	A	A	A	B	A	B	B	B	B	A	B	B	B	B	B	A	A	B
*synopGBS354	81.59	5A	TGCAGCACCTCTTTACTGAAGCTAGTGGTACTGCTCGCTGCGTATGATGTGGACCGCCATGGC	A/G	0	4070	-1	6	3	82	69	1	0.802139	A	B	A	A	A	A	A	A	A	A	B	A	B	A	A	B	A	B	A	A	A	B	A	B	B	B	B	B	B	B	B	B	B	A	A	B
*synopGBS984	81.59	5A	TGCAGGTGCAGGAAGAAAAGAAAATACGCGCAGCCGTCGCATGTCTTCGGAGATGGAGTCCAC	A/G	0	12611	-1	23	3	78	77	4	0.807487	A	B	A	A	A	A	A	A	A	A	B	A	B	A	A	B	A	B	A	A	A	B	A	B	B	B	B	B	B	B	B	B	B	A	A	B
*synopGBS1174	82.44	5A	TGCAGTCCATCGGCCGCCGCCATCAGATCAGAGCTCAGCACGACGCAGGAAAATGATTGGGTT	C/G	0	14108	-1	10	3	92	82	4	0.909091	A	B	A	A	A	A	A	A	A	A	B	A	B	A	A	B	A	B	A	A	A	B	A	B	B	B	B	B	B	B	B	B	B	A	A	B
*synopGBS1176	82.44	5A	TGCAGTCCGTCCGTCGGAGCCATCAGATCAGAGCTCAACACGACACAGGACAGCGGGACACGA	C/T	0	14184	-1	43	3	102	74	5	0.914439	A	B	A	A	A	A	A	A	A	A	B	A	B	A	A	B	A	B	A	A	A	B	A	B	B	B	B	B	B	B	B	B	B	A	A	B
*synopGBS707	82.44	5A	TGCAGGACTACCTGCGGCAACGTGAGCGTGCCGTACCCGTTCAGCATCGGCCACGGCTGCCAC	G/T	0	9927	-1	58	3	97	74	4	0.893048	A	B	A	A	A	A	A	A	A	A	B	A	B	A	A	B	A	B	A	A	A	B	A	B	B	B	B	B	B	B	B	B	B	A	A	B
*synopGBS1143	83.28	5A	TGCAGTATTTCGAAGCGAAATGTTAAGAAAAAAATAAAACATGAAAAAGTGGAAGCGTGGTCG	G/T	0	13835	-1	54	3	81	78	5	0.823529	A	B	A	A	A	A	A	A	A	A	B	A	B	A	A	B	A	B	A	A	A	B	A	B	B	B	B	B	B	B	B	B	B	A	A	B
*synopGBS1347	85.94	5A	TGCAGTTAACCCATCCCATGAAAATTCCAAGACAAGAACAAGAACGACTTCAGGTTCACACGA	C/G	0	15459	-1	15	3	77	79	6	0.802139	A	B	A	A	A	A	A	A	A	A	B	A	B	A	A	B	A	B	A	A	A	B	A	B	B	B	B	B	B	B	B	B	B	A	A	B
*synopGBS998	85.94	5A	TGCAGGTTCAGCCATTTTCCTCGGATGACGACCCCACTACTGTGCTTCTAATGGTTCCAATAG	A/G	0	12877	-1	59	1	79	78	6	0.807487	A	B	A	A	A	A	A	A	A	A	B	A	B	A	A	B	A	B	A	A	A	B	A	B	B	B	B	B	B	B	B	B	B	A	A	B
*synopGBS285	86.89	5A	TGCAGATGCGGATGATGGAGACAGAGAGATTCCACGATGCCATACCACTCCGCCATCGCGTTC	A/C	0	2976	-1	28	3	69	87	5	0.807487	A	B	A	A	A	A	A	A	A	A	B	A	B	A	A	B	A	B	A	A	A	B	A	B	B	B	B	B	B	B	B	B	B	A	A	B
*synopGBS836	87.69	5A	TGCAGGCTATTCCGACCCTCTCAAGGTCACACGACTGCACGACCTTATCTCTCATCGCCCACA	G/T	0	11286	-1	13	2	94	91	7	0.951872	A	B	A	A	A	A	A	A	A	A	B	A	B	A	A	B	A	B	A	A	B	B	A	B	B	B	B	B	B	B	B	B	B	A	A	B
*synopGBS837	87.69	5A	TGCAGGCTATTCCGACCCTCTCAAGGTCACACGACTGCACGACCTTATCTCTCATCGCCCACA	A/G	0	11287	-1	14	2	94	91	7	0.951872	A	B	A	A	A	A	A	A	A	A	B	A	B	A	A	B	A	B	A	A	B	B	A	B	B	B	B	B	B	B	B	B	B	A	A	B
*synopGBS1419	89.13	5A	TGCAGTTGATCTGCACGTACTACCTTCAGTCGGGCGGGCGGGGAGGATGGAGGAGGAGCTGAT	C/G	0	16004	-1	23	3	91	81	6	0.887701	A	B	A	A	A	A	A	A	A	A	B	A	B	A	A	B	A	B	A	A	-	B	A	B	B	B	B	B	B	B	B	B	B	A	A	B
*synopGBS578	89.13	5A	TGCAGCTCCCCTTCCTAGCTGGCTGTAGCTCCCCTTCGTTCTTCCATTAACTGCATCATGTCC	C/T	0	8175	-1	22	3	79	93	6	0.887701	A	B	A	A	A	A	A	A	A	A	B	A	B	A	A	B	A	B	A	A	A	B	A	B	B	B	B	B	B	B	B	B	B	A	A	B
*synopGBS463	91.88	5A	TGCAGCCGTCTCCACGTGCCAGAGCATCAGCTTCTAGGGAAGTCATCACAGGAGTAGCGGGGG	C/G	0	6224	-1	6	3	87	76	10	0.818182	A	B	A	A	A	A	A	A	A	A	B	A	B	A	A	B	A	B	A	A	A	B	A	B	B	B	B	B	B	B	B	B	B	A	A	B
*synopGBS1057	116.51	5A	TGCAGTAATCTACTAGATACGGAGTACTATGGAAGGGAGGGAGCAGCCGCGCGCGCTTTTAAT	A/G	0	13242	-1	7	3	87	86	7	0.887701	A	B	A	A	B	A	A	A	A	A	B	A	B	A	A	B	A	B	A	A	A	B	A	B	B	B	B	B	B	B	A	B	B	A	A	B
*synopGBS473	117.38	5A	TGCAGCCTCCGCCATGGACGAGGCACCCCTGGTGGACATAGCTTACACGACGCGGCGACCCCG	C/T	0	6397	-1	55	2	74	92	9	0.839572	A	B	A	A	B	A	A	A	A	A	B	A	B	A	A	B	A	B	A	A	A	B	A	B	B	B	B	B	B	B	A	B	B	A	A	B
*synopGBS822	117.38	5A	TGCAGGCGATGCACAGCACCACACCTCGACCTGCTAGCAACATGCGCATTAGCGAGAAAGTGA	C/T	0	11025	-1	46	3	72	83	3	0.812834	A	B	A	A	B	A	A	A	A	A	B	A	B	A	A	B	A	B	A	A	A	B	A	B	B	B	B	B	B	B	A	B	B	A	A	B
*synopGBS823	117.38	5A	TGCAGGCGATGCACAGCACCACACCTCGACCTGCTAGCAACATGCGCATTAGCGAGAAAGTGA	A/G	0	11026	-1	50	3	72	83	3	0.812834	A	B	A	A	B	A	A	A	A	A	B	A	B	A	A	B	A	B	A	A	A	B	A	B	B	B	B	B	B	B	A	B	B	A	A	B
*synopGBS284	119.12	5A	TGCAGATGCCGAGACCAATGTTCGATTAATCCCAGTGCAGAGGTTCCAGACTGTAACTCGGTT	C/G	0	2959	-1	58	3	91	76	5	0.86631	A	B	A	A	B	A	A	A	A	A	B	A	B	A	A	B	A	B	A	A	A	B	A	B	B	B	B	B	B	B	A	B	B	A	A	B
*synopGBS687	119.12	5A	TGCAGGAAGGTGACAGGAAGTGCCAATTGTCCGACTACCAAGTGGTACGTGGGGCGGGGTGAA	A/G	0	9674	-1	36	2	86	90	9	0.893048	A	B	A	A	B	A	A	A	A	A	B	A	B	A	A	B	A	B	A	A	A	B	A	B	B	B	B	B	B	B	A	B	B	A	A	B
*synopGBS1198	121.67	5A	TGCAGTCGCCCTACATCTCCCCTCGGATCGCCGACCCGCCGCCGCATCGAGAAGCCAGGGCCT	C/G	0	14311	-1	34	3	82	85	6	0.860963	A	B	A	A	B	A	A	A	A	B	B	A	B	A	A	B	A	B	A	A	A	B	B	B	B	B	B	B	B	B	A	B	B	A	A	B
*synopGBS380	121.67	5A	TGCAGCATCATATTATTCAAGCGGCAACGACCAAGGCCTGCTGCCAACACCGTCAATGGCGAC	A/G	0	4858	-1	29	2	96	84	10	0.909091	A	B	A	A	B	A	A	A	A	B	B	A	B	A	A	B	A	B	A	A	A	B	B	B	B	B	B	B	B	B	A	B	B	A	A	B
*synopGBS422	121.67	5A	TGCAGCCACTCCTGGAGGAACGCGCACGCAATGGATTACCTGAAGCAATGTTCCAGCAAGACA	A/C	0	5369	-1	37	2	95	88	11	0.919786	A	B	A	A	B	A	A	A	A	B	B	A	B	A	A	B	A	B	A	A	A	B	B	B	B	B	B	B	B	B	A	B	B	A	A	B
*synopGBS440	121.67	5A	TGCAGCCCCAATCAATTCGATCGCTACTGGTCGTGCACTCGTGCTGCTCTCAGTACTGTAAAT	A/G	0	5734	-1	51	3	72	81	2	0.807487	A	B	A	A	B	A	A	A	A	B	B	A	B	A	A	B	A	B	A	A	A	B	B	B	B	B	B	B	B	B	A	B	B	A	A	B
*synopGBS57	121.67	5A	TGCAGAAGCTGCCCAAGCTTTGAGGGACCTCCCTCCACTGCTCCACAGCCTGGCTGGATCAGG	C/T	0	640	-1	31	3	82	77	5	0.823529	A	B	A	A	B	A	A	A	A	B	B	A	B	A	A	B	A	B	A	A	A	B	B	B	B	B	B	B	B	B	A	B	B	A	A	B
*synopGBS70	121.67	5A	TGCAGAATCAGGTTGTCCACGTCGACGAATCGAACCTGGAGCTGGGCTCCCTCTTTCGCTTGG	A/T	0	763	-1	39	2	90	93	10	0.925134	A	B	A	A	B	A	A	A	A	B	B	A	B	A	A	B	A	B	A	A	A	B	B	B	B	B	B	B	B	B	A	B	B	A	A	B
*synopGBS902	121.67	5A	TGCAGGGGGAAGTCAAGGAGGAAGAAAACTTAGCGCACACACTGAAAAAACGACGTGGACGAA	A/G	0	11903	-1	9	3	80	81	11	0.802139	A	B	A	A	B	A	A	A	A	B	B	A	B	A	A	B	A	B	A	A	A	B	B	B	B	B	B	B	B	B	A	B	B	A	A	B
*synopGBS147	125.37	5A	TGCAGACGAAGAACAGAGCAGGTAAAACAAAATCTCTTCAACTCGAGCACTACCGCCACAGTT	C/T	0	1339	-1	27	3	83	87	5	0.882353	A	B	A	A	B	A	A	-	A	B	B	A	-	A	A	B	A	B	A	A	A	B	B	-	-	B	B	B	B	B	A	B	B	A	A	B
*synopGBS429	127.94	5A	TGCAGCCAGTCTACGGTTGACTTCTGCCCTCGATCCTTAGGATCAAGCGGCGGAGGAGCGCAC	G/T	0	5482	-1	14	2	94	80	12	0.86631	A	B	A	B	B	A	A	-	-	B	B	-	-	A	A	B	A	B	A	A	A	-	-	-	A	B	B	B	B	-	-	B	B	-	-	B
*synopGBS15	0	5B	TGCAGAAACGACGAGAGCCGTGGGCATGCAGTAATGTTTGGGATCACACCATCGTACTGATGC	T/C	0	147	-1	26	3	95	74	8	0.860963	A	B	-	-	A	-	-	A	B	B	-	B	-	B	B	B	B	B	A	-	B	A	B	B	B	A	A	A	B	A	B	B	-	B	A	B
*synopGBS16	0	5B	TGCAGAAACGACGAGAGCCGTGTGCACGCAGTAATGTTTGGGATCACACCATCGTACTGATGC	C/T	0	148	-1	26	1	74	95	8	0.860963	A	B	-	-	A	-	-	A	B	B	-	B	-	B	B	B	B	B	A	-	B	A	B	B	B	A	A	A	B	A	B	B	-	B	A	B
*synopGBS913	0	5B	TGCAGGTAAACACGCCTCGTGCGGGCAGGGCCTCGCGTAGAACTTGGGGATGTCATCCCCGAG	C/T	0	12098	-1	53	3	71	98	1	0.898396	A	B	B	A	A	B	A	A	B	B	A	B	B	B	B	B	B	B	A	A	B	A	B	B	B	A	A	A	B	A	B	B	A	B	A	B
*synopGBS1	0.79	5B	TGCAGAAAAAAAAACTACAATAAGACATGTGTTGTGATGGTGGAGGGCGCCGCTCGGCCATTC	A/G	0	1	-1	16	3	71	85	5	0.807487	A	B	B	A	A	B	A	A	B	B	A	B	B	B	B	B	B	B	A	A	B	A	B	B	B	A	A	A	B	A	B	B	A	B	A	B
*synopGBS1098	0.79	5B	TGCAGTAGACTAGTTGTTGCGGTTGTAAGAATGCAACAACGGGCGAGTTGCAAATCTAGTAGT	G/C	0	13497	-1	44	3	91	66	4	0.818182	A	B	B	A	A	B	A	A	B	B	A	B	B	B	B	B	B	B	A	A	B	A	B	B	B	A	A	A	B	A	B	B	A	B	A	B
*synopGBS1099	0.79	5B	TGCAGTAGACTAGTTGTTGCGGTTGTAAGAATGCAACAACGGGTCAGTTGCAAATCTAGTAGT	C/G	0	13498	-1	44	1	66	90	4	0.812834	A	B	B	A	A	B	A	A	B	B	A	B	B	B	B	B	B	B	A	A	B	A	B	B	B	A	A	A	B	A	B	B	A	B	A	B
*synopGBS1194	0.79	5B	TGCAGTCGCAATCGCGCTCGGGCAGCAAGCTCCGTGCCGCGCCTGTGAACGCGTCCATGCGCT	A/C	0	14293	-1	10	3	76	92	3	0.882353	A	B	B	A	A	B	A	A	B	B	A	B	B	B	B	B	B	B	A	A	B	A	B	B	B	A	A	A	B	A	B	B	A	B	A	B
*synopGBS1351	0.79	5B	TGCAGTTACAGCGGGTTGTACGGGGGCCGTTAGCTGCCTCCCAGTCTCCAACCAACACCACGC	G/T	0	15487	-1	28	3	99	80	9	0.909091	A	B	B	A	A	B	A	A	B	B	A	B	B	B	B	B	B	B	A	A	B	A	B	B	B	A	A	A	B	A	B	B	A	B	A	B
*synopGBS2	0.79	5B	TGCAGAAAAAAAAACTACAATAAGACATGTGTTGTGATGGTGGAGGGCGCCGCTCGGCCATTC	A/G	0	2	-1	24	3	71	85	5	0.807487	A	B	B	A	A	B	A	A	B	B	A	B	B	B	B	B	B	B	A	A	B	A	B	B	B	A	A	A	B	A	B	B	A	B	A	B
*synopGBS111	9.22	5B	TGCAGACATCCCATGTCGACGAGGAAGTGAAGCAGCTATTGGACAAGGCTTACAAGAATGCGA	C/T	0	1116	-1	19	2	78	90	5	0.871658	A	B	B	A	A	B	A	A	B	B	A	B	B	B	B	B	B	B	A	A	B	A	-	B	A	A	A	A	B	A	B	B	A	B	A	B
*synopGBS858	10.91	5B	TGCAGGCTTGCCTGGCACTCGACAAAGGCTGAAAAAAGGCGGCCACGGGTTTGCCAGCAAACA	C/G	0	11431	-1	43	3	73	85	3	0.828877	A	B	B	A	A	B	A	A	B	B	A	B	B	B	B	B	B	B	A	A	B	A	A	B	A	A	A	A	B	A	B	B	A	B	A	B
*synopGBS975	18.48	5B	TGCAGGTCTGGAGAACTAGAGATACGTAGAATCGATGAAATCCCACGCACGCACCCCCGCACA	C/T	0	12516	-1	57	3	91	76	6	0.860963	A	B	B	A	A	B	A	A	B	B	A	B	B	B	B	B	B	B	B	A	B	A	A	B	A	A	A	A	B	A	B	B	A	B	B	B
*synopGBS872	21.08	5B	TGCAGGGACAAACACTTGCTTGATCCAGCCCAGCTGTATCCCCGTGCCGCGCACCACCTTGTC	A/G	0	11512	-1	52	3	99	78	11	0.887701	A	B	B	A	A	B	-	A	-	B	A	B	B	B	B	B	B	B	B	A	B	A	A	B	A	A	A	A	B	A	B	B	A	B	B	B
*synopGBS1032	30.7	5B	TGCAGGTTTGAGCAGAACATTCCTGGAGATACTGGGTAAGCCATCACGTAACTACTAGGGTCA	C/T	0	13062	-1	31	3	88	69	3	0.823529	A	B	B	A	A	B	B	A	A	B	A	A	B	B	A	B	B	B	B	A	B	A	A	A	A	A	B	A	B	A	B	B	A	B	A	B
*synopGBS1277	31.55	5B	TGCAGTGCATGGTACTATTCCAGTAGACCAGTAGACCTTTTTGAGCAAGTTCATAGGTCAATT	C/T	0	14864	-1	58	3	70	91	3	0.84492	A	B	B	A	A	B	B	A	A	B	A	B	B	B	A	B	B	B	B	A	B	A	A	A	A	A	B	A	B	A	B	B	A	B	A	B
*synopGBS65	31.55	5B	TGCAGAATCAAAGAACGTCGTCTCATTTCATCCGCTGGTGAGTTTTACATGCACCATCGTGGT	G/T	0	749	-1	61	3	79	80	1	0.84492	A	B	B	A	A	B	B	A	A	B	A	B	B	B	A	B	B	B	B	A	B	A	A	A	A	A	B	A	B	A	B	B	A	B	-	B
*synopGBS1341	34.94	5B	TGCAGTGTTACACATCGTGTCCTACATAGGCGTCGGATTGCAACATGGTCCATGTTTAGTTCG	G/A	0	15408	-1	62	2	98	76	9	0.882353	A	B	B	B	-	B	B	A	A	B	A	B	B	B	A	B	B	B	B	B	B	A	A	A	A	A	B	A	B	A	B	B	A	B	-	B
*synopGBS626	36.63	5B	TGCAGCTTACTCTAGAGGCAGATCATGTGCTGCGGGGACTGGGAATGCGTGGTGTAGTAGAAT	G/T	0	9043	-1	31	2	93	70	5	0.84492	A	B	B	B	B	B	B	A	A	B	A	B	B	B	A	B	B	B	B	B	B	A	A	A	A	A	B	A	B	B	B	B	A	B	-	B
*synopGBS296	37.5	5B	TGCAGATGGGTTCCATGCAATCAAACCCCTTCGTCAGCACTCAGCAGCATCGCCGTGGACTGC	C/G	0	3066	-1	44	3	68	92	2	0.84492	A	B	B	B	B	B	B	A	A	B	A	B	B	B	A	B	B	B	B	B	B	A	A	A	A	A	B	A	B	B	B	B	A	B	B	B
*synopGBS297	37.5	5B	TGCAGATGGGTTCCATGCAATCAAACCCCTTCGTCAGCACTCAGCAGCATCGCCGTGGACTGC	C/G	0	3067	-1	52	3	68	92	2	0.84492	A	B	B	B	B	B	B	A	A	B	A	B	B	B	A	B	B	B	B	B	B	A	A	A	A	A	B	A	B	B	B	B	A	B	B	B
*synopGBS466	37.5	5B	TGCAGCCTATTTTCTCGGAGTGGCTGAAGGGGCGCTCCGTACGCTCCACGGAGCTGGATGACT	A/G	0	6319	-1	40	3	102	70	13	0.850267	A	B	B	B	B	B	-	A	A	B	A	B	B	B	A	B	B	B	B	B	B	A	A	A	A	A	B	A	B	B	B	B	A	B	B	B
*synopGBS467	37.5	5B	TGCAGCCTATTTTCTCGGAGTGGCTGAAGGGGCGCTCCGTACGCTCCACGGAGCTGGATGACT	A/G	0	6320	-1	51	3	102	70	13	0.850267	A	B	B	B	B	B	-	A	A	B	A	B	B	B	A	B	B	B	B	B	B	A	A	A	A	A	B	A	B	B	B	B	A	B	B	B
*synopGBS61	47.18	5B	TGCAGAAGGGGCCTTCGCAGCAGCACAGGAATCCCAGCAGCCCCACCTTCTTGCGGCACGCCG	A/G	0	671	-1	21	2	100	66	13	0.818182	A	B	B	B	B	B	-	A	A	B	A	B	A	B	A	B	B	B	B	B	B	A	A	A	A	A	B	A	B	B	B	B	A	B	B	B
*synopGBS736	47.18	5B	TGCAGGATCACTAGATGTGCAAGTGGAACACCGTCAGCATCACCATCACCTGAAAGAACTCAT	G/A	0	10278	-1	32	1	74	92	4	0.86631	A	B	B	B	B	B	-	A	A	B	A	B	A	B	A	B	B	B	B	B	B	A	A	A	A	A	B	A	B	B	B	B	A	B	B	B
*synopGBS206	49.05	5B	TGCAGATACCAGGGGGAGAAGAAGCTGGGCCTATGCGGCATCCAAATCACGTGGTACAGCGAG	A/G	0	2364	-1	57	3	90	75	7	0.84492	A	B	B	B	B	B	-	A	A	B	A	B	A	B	A	B	B	B	B	B	B	A	A	A	A	A	B	A	B	B	B	B	A	B	B	B
*synopGBS504	52.66	5B	TGCAGCGACATACTCCGCCCCGCATGAGGAAAGCACGACAATCTTCTGCTTGGCTGATTGCCA	C/T	0	6769	-1	19	2	73	103	13	0.871658	A	B	B	B	B	B	A	A	A	B	A	B	A	B	A	B	B	B	B	B	B	A	A	A	B	A	B	A	B	B	B	B	A	B	B	B
*synopGBS1336	53.45	5B	TGCAGTGTGAGGACGGCAAAATAGGGATGGCTTTTGACGTAATGGGTTACGAGCCATACCAAG	C/T	0	15354	-1	13	3	98	76	4	0.909091	A	B	B	B	B	B	A	A	A	B	A	B	A	B	A	B	B	B	B	B	B	B	A	A	B	A	B	A	B	B	B	B	A	B	B	B
*synopGBS298	53.45	5B	TGCAGATGGTGCAGACGTGCATGCTTTCCACGAGGTGGAGGCACCATTGGCGTGCCGTGCCGT	C/T	0	3075	-1	50	3	98	57	3	0.812834	A	B	B	B	B	B	A	A	A	B	A	B	A	B	A	B	B	B	B	B	B	B	A	-	B	A	B	A	B	B	B	B	A	B	B	B
*synopGBS1219	56.1	5B	TGCAGTCTCCATGGATGTGTTTGCATAATCCAGCTTGGGGACCGACACAGACCTCCTGCTTCT	A/T	0	14469	-1	14	3	69	85	2	0.812834	A	B	A	B	B	B	A	A	A	B	A	B	A	B	A	B	B	B	B	B	B	B	A	B	B	A	B	A	B	B	B	B	A	B	B	B
*synopGBS1165	59.18	5B	TGCAGTCATCGGATCAGGATCTCGTGATCGAGACCAGCATGGAGGAGCACGCCTAGCCGTGAG	A/G	0	14005	-1	38	3	83	99	6	0.941176	A	B	A	B	B	B	A	A	A	B	A	B	A	B	A	B	B	B	B	B	B	B	A	B	B	A	B	A	B	B	B	B	A	B	B	B
*synopGBS1315	63.25	5B	TGCAGTGGCCCATCGCCACACTGCCGTGCGCCCAAATCCGCCGACGAGGGAGCGCGGCTCCCG	C/T	0	15134	-1	37	3	68	88	4	0.812834	A	B	A	B	B	B	A	A	A	B	A	B	A	B	A	B	B	B	-	B	B	B	A	B	B	A	B	A	B	B	B	B	A	B	B	B
*synopGBS1269	66.03	5B	TGCAGTGCACAGAAATGTGTTCGGTAGCTTGGTTCAGAGGACTGAGCAGAGGTTATTCGGGAG	C/G	0	14794	-1	9	3	70	91	6	0.828877	A	B	A	B	B	B	A	A	A	B	A	B	A	B	A	B	B	B	A	B	B	B	A	B	B	A	B	A	B	B	B	B	A	B	B	B
*synopGBS281	66.03	5B	TGCAGATGCAGCACATGTCAGCTAATTTGCTGATCACTATCACGGGATGTTTAGCTTTTAAAT	A/T	0	2934	-1	19	3	95	63	5	0.818182	A	B	A	B	B	B	A	A	A	B	A	B	A	B	A	B	B	B	A	B	B	B	A	B	B	A	B	A	B	B	B	B	A	B	B	B
*synopGBS524	66.92	5B	TGCAGCTAAGATCCCCACCCAACCGAGCGCCGTCACGAGCTGCCGTCCTCGACGGCGAGGCCT	C/T	0	7698	-1	23	3	63	90	2	0.807487	A	B	A	B	B	B	A	A	A	B	A	B	A	B	A	B	B	B	A	B	B	B	A	B	B	A	B	A	B	B	B	B	A	B	B	B
*synopGBS382	69.44	5B	TGCAGCATCCACGGCGAAACTGGCTGGGGACCCGAGGAACAGGACGCGGGCACCCAAGCTCCG	A/G	0	4869	-1	18	3	94	82	3	0.925134	A	B	A	B	B	B	A	A	A	B	A	B	B	B	A	B	B	B	A	B	B	B	A	B	B	A	B	A	B	-	B	B	A	B	B	B
*synopGBS1118	75.38	5B	TGCAGTAGGGATTACAAGGCCACATGTTCCTACTACACAAATAACCGACCCAATGGTTCTAGT	A/C	0	13617	-1	23	3	67	92	5	0.823529	A	B	A	B	B	B	A	A	-	B	A	B	B	B	A	B	B	B	A	B	B	B	A	B	B	A	B	A	B	A	B	B	A	B	B	B
*synopGBS303	83.02	5B	TGCAGATGTTAACGAATGCAACCACAACCCATGCCCTTCCGACGGCTTCTGCCGCAATATCAT	C/T	0	3127	-1	42	3	87	69	3	0.818182	A	B	A	B	-	B	A	A	-	B	A	B	B	B	A	B	B	B	A	B	B	B	A	B	B	A	B	A	B	A	A	B	A	B	B	B
*synopGBS385	83.02	5B	TGCAGCATCTGCCTCAACCCGCCGCCATTCCCTCCCCGTGGTCATCTCTGTCAACTCGTCGAG	C/T	0	4921	-1	21	3	74	94	6	0.86631	A	B	A	B	A	B	A	A	B	B	A	B	B	B	A	B	B	B	A	B	B	B	A	B	B	A	B	A	B	A	A	B	A	B	B	B
*synopGBS386	83.02	5B	TGCAGCATCTGCCTCAACCCGCCGCCATTCCCTCCCCGTGGTCATCTCTGTCAACTCGTCGAG	T/C	0	4922	-1	44	3	74	94	6	0.86631	A	B	A	B	A	B	A	A	B	B	A	B	B	B	A	B	B	B	A	B	B	B	A	B	B	A	B	A	B	A	A	B	A	B	B	B
*synopGBS915	83.86	5B	TGCAGGTAACATACATACGCTAGATGGTAGTAGCAGCAAAGGAACATTACATATAAAGACATC	A/G	0	12110	-1	14	3	73	86	9	0.802139	A	B	A	B	A	B	A	A	B	B	A	B	B	B	A	B	B	B	A	B	B	B	A	B	B	A	B	A	B	A	A	B	A	B	B	B
*synopGBS99	83.86	5B	TGCAGACACACCACCCAGCGCAACCGTCAGAAACCACCCGTCAGCAAGCAGCAGATCGTCGGA	C/G	0	1012	-1	14	3	74	84	7	0.807487	A	B	A	B	A	B	A	A	B	B	A	B	B	B	A	B	B	B	A	B	B	B	A	B	B	A	B	A	B	A	A	B	A	B	B	B
*synopGBS1126	84.8	5B	TGCAGTAGTGGCAAGAATGATTTGGGTCTGACCATAGGAGCAGGCTTGCAGGGAGGCCAAGGC	A/G	0	13664	-1	16	3	97	63	4	0.834225	A	B	A	B	A	B	A	A	B	B	A	B	B	B	A	B	B	B	A	B	B	B	A	B	B	A	B	A	B	A	A	B	A	B	B	B
*synopGBS1018	85.7	5B	TGCAGGTTGCTCGTGGGATGGATCTGGTGTACGGCGGGGGCAGCCTGGGGCTCATGGGGGAGG	A/G	0	12977	-1	21	3	90	82	8	0.877005	A	B	A	B	A	B	A	A	B	B	-	B	B	B	A	B	B	B	A	B	B	B	A	B	B	A	B	A	B	A	A	B	A	B	B	B
*synopGBS1356	85.7	5B	TGCAGTTACTTACTTAGTTAGCTCTGCTAATGGCGGAATGGGGTAGGTGGGGCTGCTGAACGT	A/G	0	15526	-1	28	3	76	92	14	0.823529	A	B	A	B	A	B	A	A	B	B	-	B	B	B	A	B	B	B	A	B	B	B	A	B	B	A	B	A	B	A	A	B	A	B	B	B
*synopGBS835	88.33	5B	TGCAGGCTATTCCCGCCCTCTCTAGGGCACGCGGCTGCACGACCACATCGCTACGCCACCGTG	A/C	0	11285	-1	44	2	93	94	17	0.909091	A	B	A	B	A	B	A	A	B	B	-	B	B	B	A	B	B	B	A	B	B	B	A	B	B	A	B	A	B	A	A	B	A	B	B	B
*synopGBS235	92.03	5B	TGCAGATCCTCGGTTCGATACTTGGCTAGCGCGCATTTTTTTAGCCTTACAGGCTCCCCCCAC	C/G	0	2660	-1	10	3	108	56	9	0.828877	A	B	A	B	A	A	A	A	B	B	B	B	B	B	A	B	B	B	A	B	B	B	A	B	B	A	B	A	B	A	A	B	A	B	B	B
*synopGBS646	92.03	5B	TGCAGCTTGATTCGCGCGCGCAATGATGACGCCACCAGGCCATGATAATCTGCATGCAGTCGT	A/C	0	9258	-1	44	3	91	70	7	0.823529	A	B	A	B	A	A	A	A	B	B	B	B	B	B	A	B	B	B	A	B	B	B	A	B	B	A	B	A	B	A	A	B	A	B	B	B
*synopGBS1229	92.94	5B	TGCAGTCTGCTTGCAGAAGTACAGGATCTCATGTTTGATTCCAAGCCCCTGTCCACTTATGTC	A/C	0	14522	-1	22	3	88	75	8	0.828877	A	B	A	B	A	A	A	A	B	B	B	B	B	B	A	B	B	B	A	B	B	B	A	B	B	A	-	A	B	A	A	B	A	B	B	B
*synopGBS1230	92.94	5B	TGCAGTCTGCTTGCAGAAGTACAGGATCTCATGTTTGATTCCAAGCCCCTGTCCACTTATGTC	G/T	0	14523	-1	23	3	88	75	8	0.828877	A	B	A	B	A	A	A	A	B	B	B	B	B	B	A	B	B	B	A	B	B	B	A	B	B	A	-	A	B	A	A	B	A	B	B	B
*synopGBS219	100.5	5B	TGCAGATCAAAGCAGTCACTCATCTGTTATGTTAATTTGGTAGCAGAGGTTGTGTTCAGAAAT	C/G	0	2477	-1	23	2	83	79	7	0.828877	A	B	A	B	B	A	A	A	B	B	B	B	B	B	A	B	A	B	A	B	B	B	A	B	B	A	A	A	B	A	A	B	A	B	B	-
*synopGBS844	101.42	5B	TGCAGGCTCTGGCGCAACCTCGTCGACAAACGAACGACGGAGATGCAGAACTATCGGAAAGGG	A/G	0	11334	-1	15	3	73	86	7	0.812834	A	B	A	B	B	A	-	A	B	B	B	B	B	B	A	B	A	B	A	B	B	B	A	B	B	A	A	A	B	A	A	B	A	B	B	A
*synopGBS1472	102.25	5B	TGCAGTTTCTGTCGTCAAATTGGTGAGACAAGTTTTGTTTGCGCACGCCGACGTTGATTTGTA	A/G	0	16431	-1	17	3	88	95	10	0.925134	A	B	A	B	B	A	-	A	B	B	B	B	B	B	A	B	A	B	A	B	B	B	A	B	B	A	A	A	B	A	A	B	A	B	B	A
*synopGBS1473	102.25	5B	TGCAGTTTCTGTCGTCAAATTGGTGAGACAAGTTTTGTTTGCGCACGCCGACGTTGATTTGTA	T/C	0	16432	-1	59	2	88	94	10	0.919786	A	B	A	B	B	A	-	A	B	B	B	B	B	B	A	B	A	B	A	B	B	B	A	B	B	A	A	A	B	A	A	B	A	B	B	A
*synopGBS1476	111.15	5B	TGCAGTTTGAGCCTGCCCCGAAGGGAGAGGAGCCCAAGGCTAACTTCAGCGCACGACCCTAAA	A/G	0	16455	-1	21	3	86	90	9	0.893048	A	B	A	A	B	A	-	A	B	B	B	A	B	B	A	B	A	A	A	B	A	B	A	B	B	A	A	A	B	A	A	B	A	A	-	A
*synopGBS767	117.72	5B	TGCAGGCACACCCAGTCCATGAGCGACTCCACGTCCTTGGCGAAGTCGAGGAGGCACCAGTGC	C/G	0	10502	-1	26	3	69	86	2	0.818182	A	B	A	B	B	A	-	A	B	A	B	A	B	B	A	B	A	A	A	B	A	B	A	B	B	A	A	A	B	A	A	B	A	A	-	A
*synopGBS1100	120.26	5B	TGCAGTAGAGCTTGATTTCTTCTCCCTGGTCTCAGGACTGAGAGTAGCAGCATCTTCTACAGC	A/T	0	13506	-1	6	3	78	81	7	0.812834	A	B	A	B	B	A	B	A	B	A	B	A	B	B	A	B	A	A	A	B	A	B	A	B	B	A	A	A	B	A	B	B	A	A	-	A
*synopGBS1208	120.26	5B	TGCAGTCGTTGGCCTTCATCATCTGCTCCTAGTTTCTGCTGACCATGCTTCACCTGGCTCTTT	C/G	0	14415	-1	35	2	83	80	4	0.850267	A	B	A	B	B	A	B	A	B	A	B	A	B	B	A	B	A	A	A	B	A	B	A	B	B	A	A	A	B	A	B	B	A	A	-	A
*synopGBS1400	120.26	5B	TGCAGTTCCTGTTGCTACTACTCTGTACTGCTGTTTGCTGCTTTTGCTTTGCTACTATGGCTG	A/G	0	15819	-1	53	1	88	70	3	0.828877	A	B	A	B	B	A	B	A	B	A	B	A	B	B	A	B	A	A	A	B	A	B	A	B	B	A	A	A	B	A	B	B	A	A	A	A
*synopGBS1411	120.26	5B	TGCAGTTCTGTAGGATGGTTGGACTGCTTCTCCATTGACAGTCTGCCAACGCTGCCACCAGCA	A/G	0	15936	-1	47	3	91	86	5	0.919786	A	B	A	B	B	A	B	A	B	A	B	A	B	B	A	B	A	A	A	B	A	B	A	B	B	A	A	A	B	A	B	B	A	A	A	A
*synopGBS1481	120.26	5B	TGCAGTTTGTGCACTTTGCCTCCTTCCTTGGTTTCAGAGGCAGATCACCTCGGTCAGGACATG	C/T	0	16512	-1	25	3	86	89	7	0.898396	A	B	A	B	B	A	B	A	B	A	B	A	B	B	A	B	A	A	A	B	A	B	A	B	B	A	A	A	B	A	B	B	A	A	A	A
*synopGBS475	120.26	5B	TGCAGCCTCGCATTGGACTCGGCGAAACTCCAGTCCAGATCGCAGACTAGCTGGGCCCTGAGA	A/G	0	6432	-1	45	3	80	94	6	0.898396	A	B	A	B	B	A	B	A	B	A	B	A	B	B	A	B	A	A	A	B	A	B	A	B	B	A	A	A	B	A	B	B	A	A	A	A
*synopGBS848	120.26	5B	TGCAGGCTGGGAAAAGCTAGGTCGCCAGAATAGACTGGGGAATTTTTTGCATCCTTGTTAAGC	A/T	0	11387	-1	31	3	77	75	1	0.807487	A	B	A	B	B	A	B	A	B	A	B	A	B	B	A	B	A	A	A	B	A	B	A	B	B	A	A	A	B	A	B	B	A	A	A	A
*synopGBS985	120.26	5B	TGCAGGTGCTACGAAGGCGACGCCATGCTAGAGGATGGATGCTGCAAGCTCCGAGAAGGGCAA	C/T	0	12650	-1	50	3	82	87	1	0.898396	A	B	A	B	B	A	B	A	B	A	B	A	B	B	A	B	A	A	A	B	A	B	A	B	B	A	A	A	B	A	B	B	A	A	A	A
*synopGBS435	121.1	5B	TGCAGCCATGCGGGGATGCTGACCACCTCCTCGGGTGGCGTCGGGGAGGGGAAGGAGGGAGGG	C/T	0	5579	-1	31	3	76	83	2	0.839572	A	B	A	B	B	A	B	A	B	A	B	A	B	B	A	B	A	A	A	B	A	B	A	B	B	A	A	A	B	A	B	B	A	A	A	A
*synopGBS442	121.1	5B	TGCAGCCCCTCCTTATTGTGCGCTCCACGATATCCTCTTCCACCCCGTAGAAACTCTTGTCCT	C/T	0	5801	-1	45	1	80	80	3	0.839572	A	B	A	B	B	A	B	A	B	A	B	A	B	B	A	B	A	A	A	B	A	B	A	B	B	A	A	A	B	A	B	B	A	A	A	A
*synopGBS311	121.89	5B	TGCAGATTCATTGAAGAAAAGGGTGAGGCACACACAGCCTAAGAGCACGGTTTTCCCTTGCTC	G/A	0	3213	-1	49	3	90	88	7	0.914439	A	B	A	B	B	A	B	A	B	A	B	A	B	B	A	B	A	A	A	B	A	B	A	B	B	A	A	A	B	A	B	B	A	A	A	A
*synopGBS312	121.89	5B	TGCAGATTCATTGAAGAAAAGTGTGAGGCACACACAGCCTAAGAGCACGATTTTACCTTGCTC	A/G	0	3214	-1	49	2	88	90	7	0.914439	A	B	A	B	B	A	B	A	B	A	B	A	B	B	A	B	A	A	A	B	A	B	A	B	B	A	A	A	B	A	B	B	A	A	A	A
*synopGBS1446	124.92	5B	TGCAGTTGGTACGCGCCATGGTTGCGTCGACGGACACGCACGGCTGCGGCGAGCATGGCACCG	G/T	0	16170	-1	12	3	84	90	4	0.909091	A	B	A	B	B	A	B	A	B	A	B	A	B	B	A	B	A	A	A	B	A	B	A	B	B	A	A	A	B	A	B	B	A	A	A	A
*synopGBS876	124.92	5B	TGCAGGGAGAACATCACAGTCACGGTGTTGTACGGCAACATGGAGGTGGGATGGGTCCGCGTG	A/T	0	11544	-1	10	3	97	87	7	0.946524	A	B	A	B	B	A	B	A	B	A	B	A	B	B	A	B	A	A	A	B	A	B	A	B	B	A	A	A	B	A	B	B	A	A	-	A
*synopGBS1236	125.69	5B	TGCAGTCTTTATAGCATCACGGAATTGGAAGGGAAACATCACCTGGGCATCGTCCTCGTCCTC	A/G	0	14582	-1	35	2	92	80	8	0.877005	A	B	A	B	B	A	B	A	B	A	B	A	B	B	A	B	A	A	A	B	A	B	A	B	B	A	A	A	B	A	B	B	A	A	B	A
*synopGBS489	126.53	5B	TGCAGCCTGCTACTGCGCGCCGCGCGGCTGTGGCCCAAGCGACACGGCCCACGGCCTGCGCGC	A/G	0	6531	-1	43	3	77	75	2	0.802139	A	B	A	B	B	A	B	A	B	A	B	A	B	B	A	B	A	A	A	B	A	B	A	B	B	A	A	A	B	A	B	B	A	A	A	A
*synopGBS63	126.53	5B	TGCAGAAGTGGGTTCTGCCCGAGCAGCTCACGGTGGGTCAGGCAGAGGAACAACAATGCGCTG	C/T	0	686	-1	14	3	83	77	3	0.839572	A	B	A	B	B	A	B	A	B	A	B	A	B	B	A	B	A	A	A	B	A	B	A	B	B	A	A	A	B	A	B	B	A	A	-	A
*synopGBS692	126.53	5B	TGCAGGACAAAGCCTATGCGGTCCATGGGGGTGCTGAGGCTTTTATTCCTGCCCACAGGTCGC	C/T	0	9753	-1	7	3	79	81	4	0.834225	A	B	A	B	B	A	B	A	B	A	B	A	B	B	A	B	A	A	A	B	A	B	A	B	B	A	A	A	B	A	B	B	A	A	-	A
*synopGBS273	127.42	5B	TGCAGATGACCCAGAAACGACTAAAAATGGGCCAATCGGAAACATCATCTAATGTGGCGGACC	A/G	0	2859	-1	33	3	88	73	3	0.84492	A	B	A	B	B	A	B	A	B	A	B	A	B	B	A	B	A	A	A	B	A	B	A	B	B	A	A	A	B	A	B	B	A	A	-	A
*synopGBS64	127.42	5B	TGCAGAAGTGGGTTCTGCCCGAGCAGCTCACGGTGGGTCAGGCAGAGGAACAACAATGCGCTG	T/C	0	687	-1	33	3	87	73	3	0.839572	A	B	A	B	B	A	B	A	B	A	B	A	B	B	A	B	A	A	A	B	A	B	A	B	B	A	A	A	B	A	B	B	A	A	-	A
*synopGBS1330	129.96	5B	TGCAGTGTCCATTCCAAAGTTGGGAAGGCTCAAGGCTCCTTGAGCCGTCCCGAGAAACTCGCC	C/T	0	15324	-1	30	3	84	86	6	0.877005	A	B	A	B	B	A	B	A	B	A	B	A	B	B	A	B	A	A	A	A	A	B	A	B	B	A	A	A	A	A	B	B	A	A	-	A
*synopGBS127	138.53	5B	TGCAGACCCTCGCCGTGCAGGTCGCCGCAGCCACGTACGGCATGTATGTGTCTTGGATCCTTG	T/C	0	1238	-1	48	3	86	85	6	0.882353	A	B	B	B	B	A	A	A	B	A	B	A	B	B	A	B	A	A	A	A	B	B	A	B	B	A	B	A	A	A	B	B	A	A	B	A
*synopGBS128	138.53	5B	TGCAGACCCTCGCCGTGCAGGTCGCCGCAGCCACGTACGGCATGTATGTGTCTTGGATCCTTG	G/C	0	1239	-1	54	3	86	85	6	0.882353	A	B	B	B	B	A	A	A	B	A	B	A	B	B	A	B	A	A	A	A	B	B	A	B	B	A	B	A	A	A	B	B	A	A	B	A
*synopGBS49	146.73	5B	TGCAGAAGAATCGTGCGGGGCAGTGCTAGTGCTAGTGGCATCACGTTACGTATGTAGGTATCG	C/G	0	541	-1	61	3	73	81	1	0.818182	A	B	B	B	B	A	A	A	B	B	B	A	B	B	A	B	A	A	A	A	B	B	A	B	B	A	B	A	A	A	B	B	A	A	B	A
*synopGBS794	146.73	5B	TGCAGGCATTCGCTGGGAGACTCTCCCTCCCTGGCGCAGCCACCACCTACGGCATCTCCCTCT	G/T	0	10701	-1	51	2	77	87	6	0.84492	A	B	B	B	B	A	A	A	B	B	B	A	B	B	A	B	A	A	A	A	B	B	A	B	B	A	B	A	A	A	B	B	A	A	B	A
*synopGBS760	154.51	5B	TGCAGGCAACGGGCTCCGTTTCTGGGCGGCCCACTGTTAGAGAAGGCAAGTTTGAACTTCGAC	A/G	0	10463	-1	7	3	88	97	8	0.946524	A	B	B	B	B	A	A	A	B	B	B	A	B	B	B	B	A	A	A	A	B	B	A	B	B	A	B	A	A	A	B	A	A	A	B	A
*synopGBS447	158.41	5B	TGCAGCCCGAATTCACCATCTTCACACGCCTTCCTCATCTCGCCGTCATTCCAACCGCCCCTT	C/T	0	5815	-1	7	3	86	80	4	0.86631	A	B	B	B	B	A	A	A	B	B	B	A	B	B	B	B	A	A	A	A	B	B	A	B	B	A	B	A	A	A	B	A	A	A	B	A
*synopGBS739	159.28	5B	TGCAGGATCCCGCCATGGATCGAAGAGAGGGAGAGATGGGGACGACAGCAACCGAAGAATAAT	C/T	0	10296	-1	51	3	87	75	8	0.823529	A	B	B	B	B	A	A	A	B	B	B	A	B	B	B	B	A	A	A	A	B	B	A	B	B	A	B	A	A	A	B	A	A	A	B	A
*synopGBS72	167.48	5B	TGCAGAATCCGCCCCCGCTGCCACTCCTCCTAAGGCCGTCCACGGCCCAGACCGAGACCTACC	C/T	0	786	-1	47	2	80	92	6	0.887701	A	B	B	B	B	A	A	A	B	B	B	A	B	B	B	B	A	A	A	A	B	B	A	B	B	A	B	B	A	A	B	A	A	A	B	A
*synopGBS404	168.29	5B	TGCAGCATTTTTGCAAGGAGCACAAATCTTCAACGAGCATGCATCATCATTAGTTACCTACAT	A/C	0	5118	-1	38	1	74	90	4	0.855615	A	B	B	B	B	A	A	A	B	B	B	A	B	B	B	B	A	A	A	A	B	B	A	B	B	A	B	B	A	A	B	A	A	A	B	A
*synopGBS97	168.29	5B	TGCAGACAAGACGGTGTAGGTTCCAGCATCCAAACATTGAGGTTGCAGCTCGCGTCCGAGCCG	A/C	0	981	-1	17	3	78	93	5	0.887701	A	B	B	-	B	A	A	A	-	B	B	A	B	B	B	B	A	A	A	A	B	B	A	B	B	A	B	B	A	A	B	A	A	A	B	A
*synopGBS1325	171.68	5B	TGCAGTGGTTGCATGCATACGGTCCATGCAACATGGGCTCGCATGTGCGTGTGCGTTGGAGCG	C/T	0	15251	-1	31	3	102	85	14	0.925134	A	B	B	-	B	A	A	A	-	B	B	A	B	B	B	B	B	A	B	-	B	B	A	B	B	A	B	B	A	A	B	-	A	A	-	A
*synopGBS279	171.68	5B	TGCAGATGATTCCTTGGGCTAAAATATCACACCGATCCAATATCTCACGCCAAATCTGAGAGG	G/C	0	2916	-1	33	3	97	72	12	0.839572	A	B	B	-	B	A	-	-	A	B	B	A	B	B	B	B	B	A	B	-	B	B	A	B	B	A	B	B	A	-	B	-	A	A	-	-
*synopGBS280	171.68	5B	TGCAGATGATTCCTTGTGCTAAAATATCACACCCATCCAATATCTCACGCCAAATCTGAGAGG	C/G	0	2917	-1	33	1	72	97	12	0.839572	A	B	B	-	B	A	-	-	A	B	B	A	B	B	B	B	B	A	B	-	B	B	A	B	B	A	B	B	A	-	B	-	A	A	-	-
*synopGBS1390	0	5D	TGCAGTTCCAAGAGGGCGCGAGGCACCAGTGATGGTGTCGACAGGCTCAGCAGCCTTCCAGAC	C/T	0	15739	-1	26	3	71	96	5	0.86631	A	B	B	-	B	B	-	-	B	B	B	B	B	A	A	A	A	B	B	-	-	B	-	-	B	A	A	B	A	-	B	A	-	-	-	B
*synopGBS203	4.37	5D	TGCAGAGGTCATTTTGTGGTCGGCCGTGCGTGGTTGCTGGCGGCGGTTTTCTTCCTCATATGT	G/T	0	2146	-1	6	3	91	70	3	0.84492	A	B	B	A	B	-	-	A	B	B	B	B	B	B	A	A	A	B	B	-	B	B	B	B	B	A	A	B	A	A	B	A	B	-	-	B
*synopGBS358	7.17	5D	TGCAGCACGCACGCACCAACACCGCGGCCATGTCCACGACCCTGAAGGAGCAGCAAGAAGATG	A/G	0	4114	-1	18	3	91	67	8	0.802139	A	B	B	A	B	A	B	A	B	B	B	B	B	B	A	A	A	B	B	B	B	B	B	B	B	A	A	B	A	A	B	A	B	-	-	B
*synopGBS1071	11.94	5D	TGCAGTACCTCATTCTTTGGGAGTGTTTCTCGACGATGGTACTGAACCCAGAGATGGAAGATA	C/G	0	13360	-1	10	3	88	73	5	0.834225	A	B	B	A	B	A	B	A	B	B	B	B	B	B	A	A	A	B	B	B	B	B	B	B	B	A	A	B	A	A	B	A	B	B	B	B
*synopGBS1361	11.94	5D	TGCAGTTAGGACATCTGCTACGTTGAAGTCAGTAAGCCGTCCAAATGCGATCGTGCAGAATTA	C/T	0	15557	-1	11	3	69	90	5	0.823529	A	B	B	A	B	A	B	A	B	B	B	B	B	B	A	A	A	B	B	B	B	B	B	B	B	A	A	B	A	A	B	A	B	B	B	B
*synopGBS520	11.94	5D	TGCAGCTAACATAACTGAGGACGCAAGTTTGAGTCGCTCCAGCAGAACTTTTTTGCGTGCCTA	A/G	0	7687	-1	24	3	104	71	9	0.887701	A	B	B	A	B	A	B	A	B	B	B	B	B	B	A	A	A	B	B	B	B	B	B	B	B	A	A	B	A	A	B	A	B	B	B	B
*synopGBS521	11.94	5D	TGCAGCTAACATAACTGAGGACGCAAGTTTGAGTCGCTCCAGCAGAACTTTTTTGCGTGCCTA	T/C	0	7688	-1	29	3	104	71	9	0.887701	A	B	B	A	B	A	B	A	B	B	B	B	B	B	A	A	A	B	B	B	B	B	B	B	B	A	A	B	A	A	B	A	B	B	B	B
*synopGBS548	11.94	5D	TGCAGCTAGCTGACTTGCAACATCAAATTTTGCATGAACCAACAATGCCGCAACCATCCTTGG	A/C	0	7868	-1	36	3	87	73	6	0.823529	A	B	B	A	B	A	B	A	B	B	B	B	B	B	A	A	A	B	B	B	B	B	B	B	B	A	A	B	A	A	B	A	B	B	B	B
*synopGBS218	12.81	5D	TGCAGATCAAACGAGTCGAGGGCTTAACTGATCCAGGAGAGCTAGACTACAGAGGGAAACCTC	A/C	0	2476	-1	48	3	86	70	6	0.802139	A	B	B	A	B	A	B	A	B	B	B	B	B	B	A	A	A	B	B	B	B	B	B	B	B	A	A	B	A	A	B	A	B	B	B	B
*synopGBS32	13.73	5D	TGCAGAACACCATGCCGTATCTAGGTAAGAAGAGGGAAAGCTAAAACTTCGTCTAAACAAAAC	A/G	0	360	-1	56	3	102	62	5	0.850267	A	B	B	-	B	A	B	A	B	B	B	B	B	B	A	A	A	B	B	B	B	B	B	B	B	A	A	B	A	A	B	A	B	B	B	B
*synopGBS1072	14.66	5D	TGCAGTACCTCATTCTTTGGGAGTGTTTCTCGACGATGGTACTGAACCCAGAGATGGAAGATA	G/A	0	13361	-1	34	3	100	70	14	0.834225	A	B	B	B	B	A	B	A	B	B	B	B	B	B	A	A	A	B	B	B	B	B	B	B	B	A	A	B	A	A	B	A	B	B	B	B
*synopGBS138	27.86	5D	TGCAGACCTCCGTTCTTCACCCACCCTCATCTTGGTCTGGGATAGTGGTTGCGGTCAATACAT	A/C	0	1302	-1	28	3	79	92	6	0.882353	A	B	B	A	B	A	B	A	B	B	B	B	B	B	A	A	A	B	B	B	B	B	B	B	B	B	A	B	A	A	B	A	B	B	B	B
*synopGBS1222	28.68	5D	TGCAGTCTCGAGGAACCAAGACAGGGGATCTTTGCTGTAGTTTGTAGGAACGAGCAGGGATCC	A/G	0	14481	-1	48	3	94	71	4	0.860963	A	B	B	A	B	A	B	A	B	B	B	B	B	B	A	A	A	B	B	B	B	B	B	B	B	B	A	B	A	A	B	A	B	B	B	B
*synopGBS1132	29.53	5D	TGCAGTATCCTGCTCAGCGCCATCTTGGCTTCGACGAGCGCGAAGTTCTGGCCGACGCAGATC	C/T	0	13739	-1	34	2	75	86	4	0.839572	A	B	B	A	B	A	B	A	B	B	B	-	B	B	A	A	A	-	B	B	B	B	B	B	B	B	A	B	A	A	B	A	B	B	B	B
*synopGBS1406	33.24	5D	TGCAGTTCGATATGAAGAAATTATAGTTGTGCATGCACCTGTTGTTCAGTAGCTCACCAACTG	C/T	0	15845	-1	7	3	91	76	10	0.839572	A	B	B	A	B	A	B	A	B	B	B	A	B	B	A	A	A	A	B	B	B	B	B	B	B	B	A	B	A	A	-	A	B	B	B	B
*synopGBS1477	35.78	5D	TGCAGTTTGCGTGGATGGGGTGAGGAATGCCGACCACGGCAAGGCCGAGCCGTGCACGAGCAG	C/T	0	16479	-1	9	3	99	81	9	0.914439	A	B	B	A	B	A	B	A	B	B	B	A	B	B	A	A	B	A	B	-	B	B	B	B	B	B	A	B	A	A	-	A	B	B	B	B
*synopGBS1262	36.57	5D	TGCAGTGATCGATATCAAGCATGCCCAAGTTGGCGAAATAAGCGATCCACGGATGGGGTACTA	C/T	0	14743	-1	49	3	86	73	6	0.818182	A	B	B	A	B	A	B	A	B	B	B	A	B	B	A	A	B	A	B	-	B	B	B	B	B	B	A	B	A	A	-	A	B	B	B	B
*synopGBS638	36.57	5D	TGCAGCTTCTCCAGCACATTCTCGCTCTCCGCCACCACGTCGCGTATGGCTTCAACTTCCTGG	A/C	0	9194	-1	53	3	91	81	8	0.877005	A	B	B	A	B	A	B	A	B	B	B	A	B	B	A	A	B	A	B	A	B	B	B	B	B	B	A	B	A	A	A	A	B	B	B	B
*synopGBS920	36.57	5D	TGCAGGTAAGGTGGACGCAGCGGAAGGGCCCTGGGGGCGTGACGAGTATGCGGGAGACGGCCG	A/G	0	12122	-1	41	3	99	82	16	0.882353	A	B	B	A	B	A	B	A	B	B	B	A	B	B	A	A	B	A	B	B	B	B	B	B	B	B	A	B	A	A	A	A	B	B	B	B
*synopGBS102	49.71	5D	TGCAGACACCAATGGGCAAGTTCGTCAGAACTTGAATGCTATGCCTCAATCACTGAAACTAAG	C/T	0	1024	-1	43	3	88	82	10	0.855615	A	B	B	A	B	A	B	A	B	B	B	A	B	B	A	A	B	A	B	B	B	B	A	B	B	B	A	B	A	A	A	A	B	B	B	B
*synopGBS1156	49.71	5D	TGCAGTCACGTGATGGGGGCCCGTCCTCCCTTGTCTGTTGCTCACTGTCGCTGGGGCTGTCTC	G/T	0	13936	-1	15	3	87	91	6	0.919786	A	B	B	A	B	A	B	A	B	B	B	A	B	B	A	A	B	A	B	B	B	B	A	B	B	B	A	B	A	A	A	A	B	B	B	B
*synopGBS1157	49.71	5D	TGCAGTCACGTGATGGGGGCCCGTCCTCCCTTGTCTGTTGCTCACTGTCGCTGGGGCTGTCTC	T/C	0	13937	-1	35	3	87	91	6	0.919786	A	B	B	A	B	A	B	A	B	B	B	A	B	B	A	A	B	A	B	B	B	B	A	B	B	B	A	B	A	A	A	A	B	B	B	B
*synopGBS337	49.71	5D	TGCAGCAAATCCTTGACCTTGGTGGACGGGAAGTTGTCAACCACGACCACCTTTCCACCATAG	C/T	0	3532	-1	17	1	85	95	8	0.919786	A	B	B	A	B	A	B	A	B	B	B	A	B	B	A	A	B	A	B	B	B	B	A	B	B	B	A	B	A	A	A	A	B	B	B	B
*synopGBS55	49.71	5D	TGCAGAAGCGGCCAGAAAACGACAGGCCAATGCAAACTGCAAGATCTTTGGAAAAGCAGCTTA	A/G	0	626	-1	18	3	80	80	9	0.807487	A	B	B	A	B	A	B	A	B	B	B	A	B	B	A	A	B	A	B	B	B	B	A	B	B	B	A	B	A	A	A	A	B	B	B	B
*synopGBS713	57.07	5D	TGCAGGAGACAACTGGGTCGCAGGCGAGAAGAAGCTAACTTTTAGGACATGGAAACAACAAGG	C/G	0	9982	-1	24	3	93	73	5	0.860963	A	B	B	B	B	A	B	A	B	B	B	A	B	B	A	A	B	A	B	-	B	B	A	A	B	B	A	B	A	A	A	A	B	B	B	B
*synopGBS714	57.07	5D	TGCAGGAGACAACTGGGTCGCAGGCGAGAAGAAGCTAACTTTTAGGACATGGAAACAACAAGG	A/C	0	9983	-1	31	3	93	73	5	0.860963	A	B	B	B	B	A	B	A	B	B	B	A	B	B	A	A	B	A	B	-	B	B	A	A	B	B	A	B	A	A	A	A	B	B	B	B
*synopGBS715	57.07	5D	TGCAGGAGACAACTGGGTCGCAGGCGAGAAGAAGCTAACTTTTAGGACATGGAAACAACAAGG	C/T	0	9984	-1	38	3	93	73	5	0.860963	A	B	B	B	B	A	B	A	B	B	B	A	B	B	A	A	B	A	B	-	B	B	A	A	B	B	A	B	A	A	A	A	B	B	B	B
*synopGBS1389	75.45	5D	TGCAGTTCCAACAGAGGCACGTGGGCAGTCACGACCCTGTTACGCAATCCCGCGGCTACCTCC	A/G	0	15737	-1	12	3	83	76	4	0.828877	A	B	B	B	B	A	B	A	B	A	-	A	B	B	A	A	B	A	B	-	B	B	A	A	-	B	A	B	B	B	B	A	B	B	B	B
*synopGBS1457	88.9	5D	TGCAGTTGTTGACATACCTGAATGATAAGCTGCACATCATTAATGTCAAGGCATCTTGCTGCC	T/G	0	16254	-1	56	3	91	67	3	0.828877	A	B	B	B	B	A	B	A	-	A	A	B	B	B	B	A	B	A	B	A	B	B	A	A	A	B	B	B	B	B	B	A	B	B	B	B
*synopGBS1458	88.9	5D	TGCAGTTGTTGACATACCTGAATGATAAGCTGCACATCATTAATGTCAAGGCCTCTGGCTGCC	G/T	0	16255	-1	56	1	67	91	3	0.828877	A	B	B	B	B	A	B	A	-	A	A	B	B	B	B	A	B	A	B	A	B	B	A	A	A	B	B	B	B	B	B	A	B	B	B	B
*synopGBS75	92.37	5D	TGCAGAATGAATCGAGGTCGTCGAGAGCCAAGTCAGCCGCAACAGAACATATGGCAGGAACAT	A/C	0	816	-1	23	3	69	87	4	0.812834	A	B	B	B	A	A	B	A	-	A	A	B	B	B	B	A	B	A	B	A	B	B	A	A	A	B	B	B	B	B	B	A	B	B	B	B
*synopGBS1195	93.25	5D	TGCAGTCGCAGAGTGCAATTTAACAGAAACAATCCTACTGTCCTACTACTACAGCAGCCAGTT	C/T	0	14302	-1	6	3	69	94	5	0.84492	A	B	B	B	A	A	B	A	-	A	A	B	B	B	B	A	B	A	B	A	B	B	A	A	A	B	B	B	B	B	B	A	B	B	B	B
*synopGBS1196	93.25	5D	TGCAGTCGCAGAGTGCAATTTAACAGAAACAATCCTACTGTCCTACTACTACAGCAGCCAGTT	A/T	0	14303	-1	59	3	69	94	5	0.84492	A	B	B	B	A	A	B	A	-	A	A	B	B	B	B	A	B	A	B	A	B	B	A	A	A	B	B	B	B	B	B	A	B	B	B	B
*synopGBS1197	93.25	5D	TGCAGTCGCAGAGTGCAATTTAACAGAAACAATCCTACTGTCCTACTACTACAGCAGCCAGTT	G/T	0	14304	-1	60	3	69	94	5	0.84492	A	B	B	B	A	A	B	A	-	A	A	B	B	B	B	A	B	A	B	A	B	B	A	A	A	B	B	B	B	B	B	A	B	B	B	B
*synopGBS671	93.25	5D	TGCAGGAAAGGAATGGAGATCTGTACGCTCACAAGATCATGAGAAGAAGCATGCAAGAAGTTG	T/C	0	9503	-1	19	3	86	70	5	0.807487	A	B	B	B	A	A	B	A	A	A	A	B	B	B	B	A	B	A	B	A	B	B	A	A	A	B	B	B	B	B	B	A	B	B	B	B
*synopGBS672	93.25	5D	TGCAGGAAAGTAATGGAGACCTGTACGCTCACAAGATCATGAGAAGAAGCATGCAAGAAGTTG	C/T	0	9505	-1	19	1	70	86	5	0.807487	A	B	B	B	A	A	B	A	A	A	A	B	B	B	B	A	B	A	B	A	B	B	A	A	A	B	B	B	B	B	B	A	B	B	B	B
*synopGBS1291	104.84	5D	TGCAGTGCGATCGTAGCCCCTGGCCGAGGGGCACCACGCAGCGAGCAGCGCCAGGACGCCAGG	G/A	0	14943	-1	30	3	79	91	5	0.882353	A	B	B	B	A	A	B	A	A	A	A	B	B	B	B	A	B	A	B	A	A	B	A	A	A	B	B	B	B	B	B	A	B	B	B	A
*synopGBS1292	104.84	5D	TGCAGTGCGATCGTAGCCCCTGGCCGAGTGACACCACGCAGCGAGCAGCGCCAGGACGCCAGG	A/G	0	14944	-1	30	1	91	77	4	0.877005	A	B	B	B	A	A	B	A	A	A	A	B	B	B	B	A	B	A	B	A	A	B	A	A	A	B	B	B	B	B	B	A	B	B	B	A
*synopGBS1211	106.55	5D	TGCAGTCTAATCACACGGCCTTTACAAAGGAAGCAACCGTTCAAAACCACCCTTCTGCTCATT	C/G	0	14427	-1	54	3	84	70	3	0.807487	A	B	B	B	A	A	B	A	A	A	A	B	B	B	B	A	A	A	B	A	A	B	A	A	A	B	B	B	B	B	B	A	B	B	B	A
*synopGBS1171	108.26	5D	TGCAGTCCAAGATGAAATCTATTAAAGGCCGAGCCTGGCCAAGTCGACTTGATCCACCGTCCC	A/C	0	14046	-1	24	3	89	84	7	0.887701	A	B	B	B	A	A	A	A	A	A	A	B	B	B	B	A	A	A	B	A	A	B	A	A	A	B	B	B	B	B	B	A	B	B	B	A
*synopGBS1282	109.77	5D	TGCAGTGCCATTTGCCTGCTGGGATCGAAGCTCGCTCTTCACCAGGTACCCCGTCCATGGAGC	C/T	0	14901	-1	8	3	81	93	4	0.909091	A	B	B	B	A	A	A	A	A	A	A	B	B	B	B	A	A	-	B	A	A	B	A	A	A	B	B	B	B	B	B	A	B	B	B	A
*synopGBS656	123.25	5D	TGCAGCTTTGTGGACGAGTCAACATTACCAGTGTCTTTGGGAGCTAAACGTCGCTAGTAAAGT	A/C	0	9413	-1	63	1	76	95	10	0.860963	A	B	B	B	A	A	A	A	A	A	A	B	B	A	B	A	A	B	B	A	A	B	A	A	A	B	B	B	B	B	B	-	B	B	B	A
*synopGBS371	133.18	5D	TGCAGCAGCAGTTGGGTGGAACTGGAAGCAGTGCCGCTGATGCTGCCTCGGCGAGCGGCACGG	C/T	0	4457	-1	60	2	74	100	14	0.855615	A	B	B	B	A	A	A	A	A	A	A	B	B	A	B	B	A	B	B	A	A	B	A	A	A	B	B	B	B	B	B	B	B	B	B	A
*synopGBS611	134.97	5D	TGCAGCTGCGAAGTCACGCTTTTCACCACGGGGGGGTACTGCGTGTGCAAGTACCTCTTTGCA	G/A	0	8706	-1	35	3	103	63	4	0.86631	A	B	B	A	A	A	A	A	A	A	A	B	B	A	B	B	A	B	B	A	A	B	A	A	A	B	B	B	B	B	B	B	B	B	B	A
*synopGBS612	134.97	5D	TGCAGCTGCGAAGTCACGCTTTTCACCACGGGGTGATACTGCGTGTGCAAGTACCTCTTTGCA	A/G	0	8707	-1	35	1	63	103	4	0.86631	A	B	B	A	A	A	A	A	A	A	A	B	B	A	B	B	A	B	B	A	A	B	A	A	A	B	B	B	B	B	B	B	B	B	B	A
*synopGBS1283	136.72	5D	TGCAGTGCCCAGCTCATGGACACATCTACGATCACCCACCTGATCTTCCTCGATCTGATCATC	A/G	0	14903	-1	23	3	91	65	2	0.823529	A	B	B	A	A	A	A	A	A	A	A	B	B	A	B	B	A	B	B	A	A	B	A	A	A	B	B	B	B	B	B	B	B	B	B	A
*synopGBS621	136.72	5D	TGCAGCTTAATTTGCATGCATCTGCGGTAGCGTGCGTGCCAGTGTTGTCGTGTTGATTGTACG	A/G	0	9024	-1	9	3	69	104	3	0.909091	A	B	B	A	A	A	A	A	A	A	A	B	B	A	B	B	A	B	B	A	A	B	A	A	A	B	B	B	B	B	B	B	B	B	B	A
*synopGBS914	136.72	5D	TGCAGGTAAATGTCATCTCTCGTTGATACTTTGAGTCTATTGTTCGAACAAAATTTCATGGCA	C/G	0	12107	-1	44	3	63	92	3	0.812834	A	B	B	A	A	A	A	A	A	A	A	B	B	A	B	B	A	B	B	A	A	B	A	A	A	B	B	B	B	B	B	B	B	B	B	A
*synopGBS1055	138.39	5D	TGCAGTAAGTTCCAGACTCGCGGTGCTCAGATGCTCCCCTCCTTGCAAAATCCAGATCCTCTC	A/G	0	13213	-1	15	3	51	106	2	0.828877	A	B	B	A	A	A	A	A	A	A	A	B	B	A	B	B	A	B	B	A	A	B	A	A	A	B	B	B	B	B	B	B	B	B	B	A
*synopGBS1056	138.39	5D	TGCAGTAAGTTCCAGACTCGCGGTGCTCAGATGCTCCCCTCCTTGCAAAATCCAGATCCTCTC	T/C	0	13214	-1	31	2	51	105	2	0.823529	A	B	B	A	A	A	A	A	A	A	A	B	B	A	B	B	A	B	B	A	A	B	A	A	A	B	B	B	B	B	B	B	B	B	B	A
*synopGBS1273	138.39	5D	TGCAGTGCAGGGCAGGAAAGATGGGGACGAGCGCCATACCTCCACTGACGCTGGAGTAATCGT	A/G	0	14841	-1	26	3	68	103	7	0.877005	A	B	B	A	A	A	A	A	A	A	A	B	B	A	B	B	A	B	B	A	A	B	A	A	A	B	B	B	B	B	B	B	B	B	B	A
*synopGBS613	144.59	5D	TGCAGCTGCGATGTGTCGAGGTATGTGGTCAGGGAGGCTACATGGGGATCTCGTGGATTAAAA	T/C	0	8713	-1	58	3	95	61	5	0.807487	A	B	B	A	A	A	A	A	A	A	A	B	B	B	B	B	A	-	B	A	A	B	A	A	A	B	-	B	B	B	B	B	B	B	B	A
*synopGBS614	144.59	5D	TGCAGCTGCGATGTGTCGAGGTATGTGGTCAGGGAGGCTACATGGTGATCTCGTGGATCAAAA	C/T	0	8714	-1	58	1	61	95	5	0.807487	A	B	B	A	A	A	A	A	A	A	A	B	B	B	B	B	A	-	B	A	A	B	A	A	A	B	-	B	B	B	B	B	B	B	B	A
*synopGBS1187	150.04	5D	TGCAGTCCTTTTGTTGCGACGGACGTAAGCCATCCACTAGCTTCTCCATATTAACCGAACGCC	A/G	0	14252	-1	35	3	71	103	5	0.903743	A	B	B	A	A	A	A	A	A	A	A	B	B	B	B	B	A	A	A	A	A	A	A	A	A	B	-	B	B	B	B	B	B	B	B	A
*synopGBS183	150.04	5D	TGCAGAGAGGAAGCGAGTGAGGAGAGCTCCTCACATGCCGCCGTGTTGGCTCCACGGGCGATT	C/G	0	1762	-1	29	3	96	58	3	0.807487	A	B	B	A	A	A	-	A	A	A	A	B	B	B	B	B	A	A	A	A	A	A	A	A	A	B	A	B	B	B	B	B	B	B	B	A
*synopGBS184	150.04	5D	TGCAGAGAGGAAGCGAGTGAGGAGAGCTCCTCACATGCCGCCGTGTTGGCTCCACGGGCGATT	G/C	0	1763	-1	36	3	96	58	3	0.807487	A	B	B	A	A	A	-	A	A	A	A	B	B	B	B	B	A	A	A	A	A	A	A	A	A	B	A	B	B	B	B	B	B	B	B	A
*synopGBS185	150.04	5D	TGCAGAGAGGAAGCGAGTGAGGAGAGCTCCTCACATGCCGCCGTGTTGGCTCCACGGGCGATT	T/G	0	1764	-1	61	3	96	58	3	0.807487	A	B	B	A	A	A	-	A	A	A	A	B	B	B	B	B	A	A	A	A	A	A	A	A	A	B	A	B	B	B	B	B	B	B	B	A
*synopGBS245	153.81	5D	TGCAGATCGAGGGGGCGGCCTCTTATATAGCCGAAGCTCTCCGACGCCTTCTCTTCATCAGGC	G/T	0	2703	-1	10	2	93	69	4	0.84492	A	B	B	A	A	A	-	A	A	A	A	B	B	B	A	B	A	A	A	A	A	A	A	A	A	B	A	B	B	B	B	B	B	B	B	A
*synopGBS1158	182.83	5D	TGCAGTCAGCTGCCATTGGGCTGTTTGGGCGCCACCATGAGAAAAGATTGCCTGCCAGGAGCA	A/T	0	13960	-1	7	2	79	107	10	0.941176	A	B	B	A	A	A	B	A	-	B	A	B	B	B	A	B	A	B	A	A	A	A	A	A	A	B	A	B	B	B	B	B	B	A	B	A
*synopGBS1348	182.83	5D	TGCAGTTAACTAACTGTAGCTGTTGTCGGACAATGAACAGCGGTGATCTATCATAACTGGAGC	A/C	0	15462	-1	8	3	72	108	10	0.909091	A	B	B	A	A	A	B	A	B	B	A	B	B	B	A	B	A	B	A	A	A	A	A	A	A	B	A	B	B	B	B	B	B	A	B	A
*synopGBS490	182.83	5D	TGCAGCCTGCTGCCATTGGGCTGTTTGGTCGCCACCATGAGAAAAGATTGCCTGCCAGGAGCA	T/A	0	6534	-1	7	3	107	79	10	0.941176	A	B	B	A	A	A	B	A	B	B	A	B	B	B	A	B	A	B	A	A	A	A	A	A	A	B	A	B	B	B	B	B	B	A	B	A
*synopGBS1173	185.31	5D	TGCAGTCCAGATACAGCTATGAAGATTACACTTGTCAATCGTCATAGATGGGCCAAGCTTGTG	T/C	0	14076	-1	32	3	71	90	8	0.818182	A	B	B	A	A	A	B	-	B	B	A	A	B	B	A	B	A	B	A	A	A	A	A	A	A	B	A	B	B	B	B	B	B	A	B	A
*synopGBS904	200.58	5D	TGCAGGGGGAATGCTCTGTGCATGGAACGCATCCATGTGCGCTGTTCTTCCGTCAGCCGTGCC	A/G	0	11905	-1	21	3	106	74	11	0.903743	A	B	B	A	A	A	B	-	B	B	A	B	B	B	A	B	A	B	A	A	A	A	A	A	A	B	A	B	B	B	B	B	B	A	B	B
*synopGBS497	218.78	5D	TGCAGCCTTGGAGTGCCATATCAAAAATGTGAAGGCGTCGGTGTAGATGCTGTAGAAGCCGCA	A/G	0	6630	-1	22	3	73	86	5	0.823529	A	B	-	A	A	A	B	B	B	A	A	B	B	B	A	B	A	B	B	A	A	A	A	A	A	B	A	A	B	B	B	A	A	A	B	B
*synopGBS737	221.46	5D	TGCAGGATCATCTGGGGCTACGATGCAACATTGACTTTTTTGCGGTGCTGTTAGTACTGCGAT	C/T	0	10282	-1	56	3	90	80	9	0.860963	A	B	A	A	A	A	B	B	B	A	A	B	B	B	A	B	A	B	B	A	A	A	A	A	A	B	A	A	B	B	B	A	A	A	B	B
*synopGBS576	222.38	5D	TGCAGCTCATTGCACAACAACTTGAGAAGCAGACGTCGTCAGTTTCTTCAGTCCCCGCCTGCC	A/C	0	8128	-1	26	2	85	89	8	0.887701	A	B	A	A	A	A	B	B	B	A	-	B	B	B	A	B	A	B	B	A	A	A	A	A	A	B	A	A	B	B	B	A	A	A	B	B
*synopGBS598	222.38	5D	TGCAGCTCGCCGAGTTTGGGCAGCAGTTCATGTCCTTCTCCCGCGACTACCCACTCGCTTTCC	C/T	0	8357	-1	43	3	82	86	9	0.850267	A	B	A	A	A	A	B	B	B	A	-	B	B	B	A	B	A	B	B	A	A	A	A	A	A	B	A	A	B	B	B	A	A	A	B	B
*synopGBS73	223.24	5D	TGCAGAATCTCATGTTGAAAAACCTGAGCTTATCGCAAGCCCTAATGAGGTCGGTGATGTCGG	C/G	0	800	-1	51	3	78	82	5	0.828877	A	B	A	A	A	A	B	B	B	A	B	B	B	B	A	B	A	-	B	A	A	A	A	A	A	B	A	A	B	B	B	A	A	A	B	B
*synopGBS1120	226.88	5D	TGCAGTAGGGCGTCCCTCCCACGCTTTCCTTCCTACACATCGTGCCGCTTGCTGCACCGCATT	C/T	0	13622	-1	10	3	78	79	5	0.812834	A	B	A	A	A	A	B	B	B	A	B	B	B	B	A	B	A	-	B	A	A	A	A	A	A	B	A	A	B	B	B	A	A	A	B	B
*synopGBS1121	226.88	5D	TGCAGTAGGGCGTCCCTCCCACGCTTTCCTTCCTACACATCGTGCCGCTTGCTGCACCGCATT	A/G	0	13623	-1	36	3	78	79	5	0.812834	A	B	A	A	A	A	B	B	B	A	B	B	B	B	A	B	A	-	B	A	A	A	A	A	A	B	A	A	B	B	B	A	A	A	B	B
*synopGBS493	226.88	5D	TGCAGCCTTCATCGCCGCCATTTTCGCCGTCCTGGTTCTGCCTTCCATGGGCCGCTGCCCGTC	C/T	0	6582	-1	14	3	77	80	4	0.818182	A	B	A	A	A	A	B	B	B	A	B	B	B	B	A	B	A	-	B	A	A	A	A	A	A	B	A	A	B	B	B	-	A	A	B	B
*synopGBS54	226.88	5D	TGCAGAAGCCATTGTTTGTTCTACGCGGCAAGCAACTGGCTAGAGACGGCAGAGAGGAAGACA	G/T	0	613	-1	47	3	79	89	5	0.871658	A	B	A	-	A	A	B	B	B	A	B	B	B	B	A	B	A	-	B	A	A	A	A	-	A	-	A	A	B	-	B	-	A	A	B	B
*synopGBS121	0	6A	TGCAGACCAAGCTGAGGGGCCAGCTGCACAAAGGGGAACCACCCATTGCCATCCGAGAGAATG	G/T	0	1164	-1	22	2	85	86	5	0.887701	A	B	A	A	B	B	-	B	B	A	A	A	B	A	B	B	A	A	B	-	-	A	B	A	B	A	A	A	A	B	-	A	A	A	B	A
*synopGBS1019	0.81	6A	TGCAGGTTGGAGAGCATGACGTCTACGTGGTCTCTCCCCTGCCAAAGTGGAGCGCGAGCCCGA	C/G	0	12986	-1	42	3	85	73	5	0.818182	A	B	A	A	B	B	B	B	B	A	A	A	B	A	B	B	A	A	B	A	B	A	B	A	B	A	A	A	A	B	-	A	A	A	B	A
*synopGBS363	0.81	6A	TGCAGCACGTGGCTCATTCGCGTACGTACATGCTACTGCATGCCACCGAGACCATGACGTTGA	T/A	0	4181	-1	59	3	77	79	3	0.818182	A	B	A	A	B	B	B	B	B	A	A	A	B	A	B	B	A	A	B	A	B	A	B	A	B	A	B	A	A	B	A	A	A	A	B	A
*synopGBS528	0.81	6A	TGCAGCTACAAGTATGAAGAGGAAGAGAGTCGCATGATGCATGGTCCTCGACTGCTCGAGTAG	C/G	0	7741	-1	45	3	83	82	4	0.860963	A	B	A	A	B	B	B	B	B	A	A	A	B	A	B	B	A	A	B	A	B	A	B	A	B	A	-	A	A	B	A	A	A	A	B	A
*synopGBS529	0.81	6A	TGCAGCTACAAGTATGAAGAGGAAGAGAGTCGCATGATGCATGGTCCTCGACTGCTCGAGTAG	G/C	0	7742	-1	59	3	83	82	4	0.860963	A	B	A	A	B	B	B	B	B	A	A	A	B	A	B	B	A	A	B	A	B	A	B	A	B	A	-	A	A	B	A	A	A	A	B	A
*synopGBS860	0.81	6A	TGCAGGCTTTGGAAGCACACCAGTGCAGTCATCAGTTCGGCCGCTCTGGCTGTACCCAAGCAT	A/C	0	11446	-1	18	3	90	70	2	0.84492	A	B	A	A	B	B	B	B	B	A	A	A	B	A	B	B	A	A	B	A	B	A	B	A	B	A	A	A	A	B	A	A	A	A	B	A
*synopGBS861	0.81	6A	TGCAGGCTTTGGAAGCACACCAGTGCAGTCATCAGTTCGGCCGCTCTGGCTGTACCCAAGCAT	G/A	0	11447	-1	38	3	90	70	2	0.84492	A	B	A	A	B	B	B	B	B	A	A	A	B	A	B	B	A	A	B	A	B	A	B	A	B	A	A	A	A	B	A	A	A	A	B	A
*synopGBS992	0.81	6A	TGCAGGTTCAACGCGTGCTGGGCTATCCTGCATGCGATCTGGCCTGCCACACAGCCTATAGAT	C/T	0	12862	-1	17	3	82	96	9	0.903743	A	B	A	A	B	B	B	B	B	A	A	A	B	A	B	B	A	A	B	A	B	A	B	A	B	A	A	A	A	B	A	A	A	A	B	A
*synopGBS993	0.81	6A	TGCAGGTTCAACGCGTGCTGGGCTATCCTGCATGCGATCTGGCCTGCCACACAGCCTATAGAT	C/T	0	12863	-1	47	3	88	90	9	0.903743	A	B	A	A	B	B	B	B	B	A	A	A	B	A	B	B	A	A	B	A	B	A	B	A	B	A	A	A	A	B	A	A	A	A	B	A
*synopGBS362	1.67	6A	TGCAGCACGTGGCTCATTCGCGTACGTACATGCTACTGCATGCCACCGAGACCATGACGTTGA	A/G	0	4180	-1	27	3	77	79	3	0.818182	A	B	A	A	B	B	B	B	B	A	A	A	B	A	B	B	A	A	B	A	B	A	B	A	B	A	B	A	A	B	A	A	A	A	B	A
*synopGBS173	2.51	6A	TGCAGACTGATATGAGAGAGAGAGCAGCTAGCACACATCCCAACCATCCTAGTCTATTGTTTG	G/T	0	1564	-1	21	3	83	79	9	0.818182	A	B	A	A	B	B	B	B	B	A	A	A	B	A	B	B	A	A	B	A	B	A	B	A	B	A	A	A	A	B	A	A	A	A	B	A
*synopGBS43	4.16	6A	TGCAGAACCTGAGGTTCGGGGAATCGGACATACCCAACATCCTAGCCACCTGCAAGCGGCTGG	A/G	0	439	-1	27	2	85	92	7	0.909091	A	B	A	A	B	B	B	B	B	A	A	A	B	A	B	B	A	A	B	A	B	A	B	A	B	A	B	A	A	B	A	A	A	A	B	A
*synopGBS964	8.37	6A	TGCAGGTCCTGCTTCTTCTTCTGCTTCCTATCCTGAGCCCCTTTCATCTGCACAGAGGACGGC	A/G	0	12423	-1	53	2	86	85	4	0.893048	A	B	A	A	B	B	B	B	B	A	A	A	B	A	B	B	A	A	B	A	B	A	B	A	B	A	B	A	A	B	A	A	A	A	B	A
*synopGBS1043	9.17	6A	TGCAGGTTTTCCAGCTCTGTAGCATCATCCCCGTGTCTGACCGCTATAAGGCCAACTCCACCG	A/T	0	13085	-1	20	1	80	80	6	0.823529	A	B	A	A	B	B	B	B	B	A	A	A	B	A	B	B	A	A	B	A	B	A	B	A	B	A	A	A	A	B	A	A	A	A	B	A
*synopGBS14	9.17	6A	TGCAGAAACCACGCCACCAGTAGACGAGCCACAGAATTCAGCGATATCGATCATGGGCCGACC	A/G	0	133	-1	63	3	79	81	5	0.828877	A	B	A	A	B	B	B	B	B	A	A	A	B	A	B	B	A	A	B	A	B	A	B	A	B	A	A	A	A	B	A	A	A	A	B	A
*synopGBS367	9.17	6A	TGCAGCAGATGTGAATCGGTCTCAAGGCAAATTCGGATCGCCCCTAAATGGTTTGCCAGCTCC	A/C	0	4373	-1	8	3	72	86	1	0.839572	A	B	A	A	B	B	B	B	B	A	A	A	B	A	B	B	A	A	B	A	B	A	B	A	B	A	A	A	A	B	A	A	A	A	B	A
*synopGBS368	9.17	6A	TGCAGCAGATGTGAATCGGTCTCAAGGCAAATTCGGATCGCCCCTAAATGGTTTGCCAGCTCC	A/G	0	4374	-1	46	3	72	86	1	0.839572	A	B	A	A	B	B	B	B	B	A	A	A	B	A	B	B	A	A	B	A	B	A	B	A	B	A	A	A	A	B	A	A	A	A	B	A
*synopGBS912	9.17	6A	TGCAGGGTTTCCAGCTCTGTTGCATCATCCCCGTGTCTGACCGCTATAAGGCCAACTCCACCG	T/A	0	12086	-1	20	3	80	80	6	0.823529	A	B	A	A	B	B	B	B	B	A	A	A	B	A	B	B	A	A	B	A	B	A	B	-	B	A	A	A	A	B	A	A	A	A	B	A
*synopGBS681	11.87	6A	TGCAGGAAGATGCCGCGCTGCGTCGTCTCTTCTTACGCGCTCGGTCGAGGAGCAGGAGACGAC	C/G	0	9628	-1	39	3	66	87	3	0.802139	A	B	A	-	B	B	B	B	B	A	A	A	B	A	B	B	A	A	B	A	B	A	B	-	B	A	A	A	A	B	A	A	A	A	B	A
*synopGBS1363	17.28	6A	TGCAGTTAGTAGGCCTTGAGCGCGTGGCCTGTTTGCGCAAAGACGAAATATTTGTGCAGACGA	C/G	0	15562	-1	20	1	80	81	6	0.828877	A	B	A	B	B	B	B	B	B	A	A	A	B	A	B	B	A	A	B	A	B	A	B	B	B	A	A	A	A	B	A	A	A	A	B	A
*synopGBS304	17.28	6A	TGCAGATGTTGGGTGTCAGTATGAAGAAGAGAGATTTATGGCCTCTGGCGTCTCTATCCAGCG	G/C	0	3142	-1	46	3	75	97	10	0.86631	A	B	A	B	B	B	B	B	B	A	A	A	B	A	B	B	A	A	B	A	B	A	B	B	B	A	A	A	A	B	A	A	A	A	B	A
*synopGBS305	17.28	6A	TGCAGATGTTGGGTGTCAGTATGAAGAAGAGAGATTTATGGCCTCTGGCGTCTCTATCCAGCG	G/A	0	3143	-1	47	3	78	94	10	0.86631	A	B	A	B	B	B	B	B	B	A	A	A	B	A	B	B	A	A	B	A	B	A	B	B	B	A	A	A	A	B	A	A	A	A	B	A
*synopGBS306	17.28	6A	TGCAGATGTTGTGTGTCAGTATGAAGAAGAGAGATTTATGGCCTCTCAAGTCTCTATCCAGCG	C/G	0	3145	-1	46	3	97	75	10	0.86631	A	B	A	B	B	B	B	B	B	A	A	A	B	A	B	B	A	A	B	A	B	A	B	B	B	A	A	A	A	B	A	A	A	A	B	A
*synopGBS307	17.28	6A	TGCAGATGTTGTGTGTCAGTATGAAGAAGAGAGATTTATGGCCTCTCAAGTCTCTATCCAGCG	A/G	0	3146	-1	47	3	97	78	13	0.86631	A	B	A	B	B	B	B	B	B	A	A	A	B	A	B	B	A	A	B	A	B	A	B	B	B	A	A	A	A	B	A	A	A	A	B	A
*synopGBS436	17.28	6A	TGCAGCCATGGCCACTCCAAGACCGCCATACCTCAGAGTGTGTGACGGCAGACAGCGTGTTGG	A/T	0	5590	-1	44	3	83	81	4	0.855615	A	B	A	B	B	B	B	B	B	A	A	A	B	A	B	B	A	A	B	A	B	A	B	B	B	A	A	A	A	B	A	A	A	A	B	A
*synopGBS1360	47.65	6A	TGCAGTTAGCTGCACCTTAACATCCAGCACCGTGGGTTAATTAGAGAAGATGGCACGGCGTTT	C/G	0	15550	-1	55	3	91	82	9	0.877005	A	B	A	B	B	-	B	-	B	B	B	B	B	A	B	B	B	A	B	A	B	B	B	B	B	A	A	B	A	-	-	B	A	A	B	-
*synopGBS4	59.02	6A	TGCAGAAAAACAAGACACCAAGCTTAGCCGTAGGCCCTAGCTTCGTTGTAAGTTTTGTACACT	C/G	0	16	-1	17	3	70	85	1	0.823529	A	B	B	B	B	A	B	A	B	B	B	B	B	A	B	B	B	A	B	A	-	B	A	B	B	A	A	B	B	A	-	B	A	A	B	B
*synopGBS1020	67.9	6A	TGCAGGTTGGCCAAGCTAGCAACCGATTGATCGACGGCAAGGACCACCCACAGGCCACAGCCA	C/G	0	12992	-1	54	3	89	68	6	0.807487	A	B	B	B	A	A	B	A	B	B	B	B	B	A	B	B	B	A	B	A	A	B	A	B	B	B	A	B	B	A	B	B	-	A	B	-
*synopGBS107	67.9	6A	TGCAGACACGACGACGATTCAATCACGCAGAGGCGCAGTTCGCAGGATGACTCACCCTTCGTG	G/T	0	1038	-1	44	3	82	89	5	0.887701	A	B	B	B	A	A	B	A	B	B	B	B	B	A	B	B	B	A	B	A	A	B	A	B	B	B	A	B	B	A	B	B	B	A	B	A
*synopGBS1167	67.9	6A	TGCAGTCATTCAGATGATTCAGAACCACTGTCGGAGTAACGAGATGTGGAAAGATTCAGATGA	C/T	0	14030	-1	31	3	84	71	5	0.802139	A	B	B	B	A	A	B	A	B	B	B	B	B	A	B	B	B	A	B	A	A	B	A	B	B	B	A	B	B	A	B	B	B	A	B	A
*synopGBS1431	67.9	6A	TGCAGTTGCACTGGTTTCGGTGCTGCTGCTGAGCCTCGCGCACGGCTCCCTGGGGGCTCATGG	C/T	0	16033	-1	47	3	98	84	11	0.914439	A	B	B	B	A	A	B	A	B	B	B	B	B	A	B	B	B	A	B	A	A	B	A	B	B	B	A	B	B	A	B	B	B	A	B	A
*synopGBS52	67.9	6A	TGCAGAAGATCCACGGAGACGAAGCAAACGAACATGTCGATGAGGTGATCACCAGAGGCTGCA	C/T	0	584	-1	61	3	94	74	7	0.860963	A	B	B	B	A	A	B	A	B	B	B	B	B	A	B	B	B	A	B	A	A	B	A	B	B	B	A	B	B	A	B	B	B	A	B	A
*synopGBS853	67.9	6A	TGCAGGCTGTTGTTCCTGGCCAACACTCGGGCGTGCCCAGCCATGGGAATGGTTGTGCCTATG	C/G	0	11409	-1	36	3	109	74	8	0.935829	A	B	B	B	A	A	B	A	B	B	B	B	B	A	B	B	B	A	B	A	A	B	A	B	B	B	A	B	B	A	B	B	B	A	B	A
*synopGBS27	70.58	6A	TGCAGAAATTCATGCGAGCGCCGTGCCCGAATTCTGAGATGGGGGCAACGACCATACGGTTGA	C/T	0	302	-1	14	3	96	79	6	0.903743	A	B	B	B	A	A	B	A	B	B	B	B	B	A	B	B	B	A	B	A	A	B	A	B	B	B	A	B	B	A	B	B	B	A	B	A
*synopGBS890	70.58	6A	TGCAGGGCATCATTATTGTGTACATGGAGCGAGAGTGGTCGATGAGTGCATGCTCCATGCTGG	C/T	0	11688	-1	29	3	82	73	3	0.812834	A	B	B	B	A	A	B	A	B	B	B	B	B	A	B	B	B	A	B	A	A	B	A	B	B	B	A	B	B	A	B	B	B	A	B	A
*synopGBS28	71.38	6A	TGCAGAAATTCGACCCCGAACCCAACCAAATCTACCTACGCGACCCGCAGAGCAGAACCCCAA	A/G	0	304	-1	23	3	86	77	3	0.855615	A	B	B	B	A	A	B	A	B	B	B	B	B	A	B	B	B	A	B	A	A	B	A	B	B	B	A	B	B	A	B	B	B	A	B	A
*synopGBS911	71.38	6A	TGCAGGGTTCAGCTGAACTGCGTGCAGGCATGCCAAATTTTCTCGGCTGATCTAGGGAAATCT	A/G	0	12071	-1	25	3	78	89	4	0.871658	A	B	B	B	A	A	B	A	B	B	B	B	B	A	B	B	B	A	B	A	A	B	A	B	B	B	A	B	B	A	B	B	B	A	B	A
*synopGBS1114	74.86	6A	TGCAGTAGCTTCATCCCAAAACCCGATTACTGGGGTGGCTACAGGTTGACACCAAATCTTTTT	C/T	0	13589	-1	51	1	74	82	3	0.818182	A	B	B	B	A	A	B	A	B	B	B	B	B	A	B	B	B	A	B	A	A	B	A	B	B	B	A	B	B	A	B	B	B	A	B	A
*synopGBS42	74.86	6A	TGCAGAACCTCCTGCCCACAACAAGTAAATTGCATGCCGCATGCATCCCCACTGCAACGCCGC	A/C	0	438	-1	20	3	77	95	4	0.898396	A	B	B	B	A	A	B	A	B	B	B	B	B	A	B	B	B	A	B	A	A	B	A	B	B	B	A	B	B	A	B	B	B	A	B	A
*synopGBS811	74.86	6A	TGCAGGCCCGCTCGGAAGAGGCATACGCAGCACAGGCACTCCTGAAGCTACGCGCAACAAGAA	C/T	0	10839	-1	52	3	92	71	5	0.84492	A	B	B	-	A	A	B	A	B	B	B	B	B	A	B	B	B	A	B	A	A	B	A	B	B	B	A	B	B	A	B	B	B	A	B	A
*synopGBS1303	82.01	6A	TGCAGTGCTCGGAACGGATTGCTGCGATATGGCCTGGGGGAGCTGCATCCATCCTACGCCACA	G/T	0	15016	-1	35	2	88	74	4	0.84492	A	B	B	-	A	A	B	A	B	B	B	B	B	A	B	B	B	A	B	A	A	B	B	B	B	B	A	B	B	A	B	B	B	A	B	A
*synopGBS1069	86.6	6A	TGCAGTACCAACTACATCAACCTCATGCAGGCAGCACCTTGTTAAGTGCGATGTTAGGATTGT	C/T	0	13332	-1	7	3	62	91	1	0.812834	A	B	B	A	A	A	B	A	B	B	-	B	B	A	B	B	B	B	-	A	A	B	B	B	B	A	A	B	B	A	B	B	B	A	B	A
*synopGBS1070	86.6	6A	TGCAGTACCAACTACATCAACCTCATGCAGGCAGCACCTTGTTAAGTGCGATGTTAGGATTGT	T/G	0	13333	-1	42	3	62	91	1	0.812834	A	B	B	A	A	A	B	A	B	B	-	B	B	A	B	B	B	B	-	A	A	B	B	B	B	A	A	B	B	A	B	B	B	A	B	A
*synopGBS1239	90.27	6A	TGCAGTGAAACTTACGTGTGAAATTGGAATCTACTCTTCATCGTCTTGGAATGTAGTGAAACA	A/C	0	14594	-1	32	3	91	70	2	0.850267	A	B	B	A	A	A	B	A	B	B	-	B	B	A	B	B	B	B	-	A	A	B	B	B	B	A	-	B	B	A	B	B	B	A	B	A
*synopGBS1401	95.58	6A	TGCAGTTCCTTATGATGGTTCCAGCAAAACTCCATAGCGGTTGTAGCCAAAAACCTCGCCGTC	C/T	0	15820	-1	8	3	63	93	2	0.823529	A	B	B	A	A	A	B	A	B	B	A	B	B	A	B	B	B	B	-	A	A	B	B	B	B	A	B	B	B	A	B	B	B	A	B	A
*synopGBS1402	95.58	6A	TGCAGTTCCTTATGATGGTTCCAGCAAAACTCCATAGCGGTTGTAGCCAAAAACCTCGCCGTC	T/C	0	15821	-1	10	3	63	93	2	0.823529	A	B	B	A	A	A	B	A	B	B	A	B	B	A	B	B	B	B	-	A	A	B	B	B	B	A	B	B	B	A	B	B	B	A	B	A
*synopGBS1403	95.58	6A	TGCAGTTCCTTATGATGGTTCCAGCAAAACTCCATAGCGGTTGTAGCCAAAAACCTCGCCGTC	T/C	0	15822	-1	43	3	63	93	2	0.823529	A	B	B	A	A	A	B	A	B	B	A	B	B	A	B	B	B	B	-	A	A	B	B	B	B	A	B	B	B	A	B	B	B	A	B	A
*synopGBS457	98.39	6A	TGCAGCCGATGCACAGCACGACACCTCGACCTGCTAGCTGCATGCGCATTGGCGAGAAAGGGA	A/G	0	6034	-1	47	3	60	92	1	0.807487	A	B	B	A	A	A	B	A	B	B	A	B	B	A	B	B	B	B	A	A	A	B	B	B	B	A	B	B	B	A	B	B	B	A	B	A
*synopGBS91	103.89	6A	TGCAGACAAACATGGCAAATTAGAGCTTGATCATGCCGAAACATTTTGCAGACAATTGATCCT	C/G	0	956	-1	61	3	63	90	1	0.812834	A	B	B	A	A	A	B	A	B	B	A	B	B	A	B	B	B	B	A	A	A	B	B	A	B	A	B	B	B	B	B	B	B	A	B	A
*synopGBS130	112.46	6A	TGCAGACCGAGCAGGTTTGTGCCTTGCAACCGTGTGCAAGCAAAAGTTCATGCATGTGCCCAA	A/T	0	1252	-1	38	3	85	67	2	0.802139	A	B	B	A	A	A	B	A	B	B	A	B	A	A	B	A	B	B	A	A	A	B	A	A	B	A	B	B	B	B	B	A	B	A	B	A
*synopGBS839	112.46	6A	TGCAGGCTCATCTCCACACGGATACTGCGAATCTCTGAAAACCAGCTCAGCGGAGAGCTTCCC	A/G	0	11298	-1	29	3	77	100	4	0.925134	A	B	B	A	A	A	B	A	B	B	A	B	A	A	B	A	B	B	A	A	A	B	A	A	B	A	B	B	B	B	B	A	B	A	B	A
*synopGBS870	112.46	6A	TGCAGGGAAGCCCTGCGCCACCTGAGACCCGTGTGCGAGGGGGAGGAGGTCCCGCCATTGCCA	C/T	0	11490	-1	20	3	72	89	4	0.839572	A	B	B	A	A	A	B	A	B	B	A	B	A	A	B	A	B	B	A	A	A	B	A	A	B	A	B	B	B	B	B	A	B	A	B	A
*synopGBS871	112.46	6A	TGCAGGGAAGCCCTGCGCCACCTGAGACCCGTGTGCGAGGGGGAGGAGGTCCCGCCATTGCCA	A/G	0	11491	-1	63	2	72	91	6	0.839572	A	B	B	A	A	A	B	A	B	B	A	B	A	A	B	A	B	B	A	A	A	B	A	A	B	A	B	B	B	B	B	A	B	A	B	A
*synopGBS1487	121.05	6A	TGCAGTTTTCTGTCTCTCCTATGCGGAAGGAGGACGAAGCGAGGAGGAGCAATCCGATGGCTC	G/A	0	16590	-1	55	2	82	77	1	0.84492	A	B	B	A	A	A	-	A	B	B	A	B	A	A	B	A	B	B	A	A	A	B	A	A	B	A	B	B	B	B	B	A	B	A	B	B
*synopGBS810	122.72	6A	TGCAGGCCCGACCGCAAGTCCAGGACATGGAGCTCCCGATGACGAATGATGCAGGGCGCATCC	A/G	0	10833	-1	52	3	85	77	1	0.860963	A	B	B	A	A	A	A	A	B	B	A	B	A	A	B	A	B	B	A	A	B	B	A	A	B	A	B	B	B	B	B	A	B	A	B	B
*synopGBS229	130.63	6A	TGCAGATCCATCGTCTCCACGCTGGAGGACTGCCTGCCCCTCTTCGGGTCCTCCGAGAACTTC	C/T	0	2595	-1	33	3	78	83	1	0.855615	A	B	B	A	A	A	A	A	B	B	A	B	A	A	B	A	A	B	A	A	B	A	A	A	B	A	B	B	B	B	-	A	B	A	B	B
*synopGBS85	130.63	6A	TGCAGAATGTGCCTTCCTGAATGGCATGATGCATTTCCTGCATCTGGCGATCGAGGAACCTTT	C/T	0	867	-1	36	3	84	86	6	0.877005	A	B	B	A	A	A	A	A	B	B	A	B	A	A	B	A	A	B	A	A	B	A	A	A	B	A	B	B	B	B	A	A	B	A	B	B
*synopGBS1182	131.46	6A	TGCAGTCCTCCACAGCAGTATATCTCGCTTACAGCACAGGCATTTGCGGAGCCATTAGTGTGT	T/C	0	14213	-1	60	2	83	72	4	0.807487	A	B	B	A	A	A	A	A	B	B	A	B	A	A	B	A	A	B	A	A	B	A	A	A	B	A	B	B	B	B	A	A	B	A	B	B
*synopGBS1183	131.46	6A	TGCAGTCCTCCACAGCAGTATATCTCGCTTACAGCACAGGTATTTGCGGAGCCATCAGTGCGT	C/T	0	14214	-1	60	2	75	82	4	0.818182	A	B	B	A	A	A	A	A	B	B	A	B	A	A	B	A	A	B	A	A	B	A	A	A	B	A	B	B	B	B	A	A	B	A	B	B
*synopGBS122	131.46	6A	TGCAGACCATGCATCCGACGCAATGGAAGAAGAACCTCGTTATCGTATCTTCCAAAAGGAATG	C/G	0	1203	-1	18	3	88	78	2	0.877005	A	B	B	A	A	A	A	A	B	B	A	B	A	A	B	A	A	B	A	A	B	A	A	A	B	A	B	B	B	B	A	A	B	A	B	B
*synopGBS785	131.46	6A	TGCAGGCAGCCACTGATGAACCATGGAAAACAAATTGGTTTTGGCTTTGCCATGCCACCTTTT	C/T	0	10612	-1	54	1	82	82	4	0.855615	A	B	B	A	A	A	A	A	B	B	A	B	A	A	B	A	A	B	A	A	B	A	A	A	B	A	B	B	B	B	A	A	B	A	B	B
*synopGBS999	133.1	6A	TGCAGGTTCATCAAAACATGCATCGACTTCATGCACCAGCGTTGTTGTGCACAAGCACGAGAT	C/G	0	12886	-1	16	2	92	74	2	0.877005	A	B	B	A	A	A	A	A	B	B	A	B	A	A	B	A	A	B	A	A	B	A	A	A	B	A	B	B	B	B	A	A	B	A	B	B
*synopGBS24	134.93	6A	TGCAGAAATCGGGGAAAAAATAGGATCTTCAGCATCCGAATGGCGAATGGAGAAGGAAGGGGA	A/C	0	253	-1	21	3	72	85	4	0.818182	A	B	B	A	A	A	A	A	B	B	A	B	A	A	B	A	A	B	A	A	B	A	A	A	B	A	B	B	A	B	A	A	B	A	B	B
*synopGBS509	134.93	6A	TGCAGCGCCAAATAGGGTTCGCCCGTACAGACGGCGCAGTGTGAGCTAAGCCAACCTTTTGCG	C/T	0	7043	-1	7	3	55	104	9	0.802139	A	B	B	A	A	A	A	A	B	B	A	B	A	A	B	A	A	B	A	A	B	A	A	A	B	A	B	B	A	B	A	A	B	A	B	B
*synopGBS889	134.93	6A	TGCAGGGCAGCCTAAGCCACAGCCTCCGCCTGGCAGCATCATATGCTATGTTGTTGGCGGAGA	G/T	0	11672	-1	15	3	73	79	1	0.807487	A	B	B	A	A	A	A	A	B	B	-	B	A	A	B	A	A	B	A	A	B	A	A	A	B	A	B	B	A	B	A	A	B	A	B	B
*synopGBS478	135.82	6A	TGCAGCCTCGCGGAATGCTTGAAAAGCATCGATGGCAATTGCAGTGCTGTCGCACGTCGTCGT	C/T	0	6441	-1	10	3	82	78	1	0.850267	A	B	B	A	A	A	A	-	B	B	-	B	A	A	-	A	A	B	A	A	B	A	A	A	B	A	-	B	B	-	A	A	B	A	-	B
*synopGBS1161	0	6B	TGCAGTCAGGTAATGACGCCATCCTCCACTCCCACTGCCTCGTGTGCTGCCGCCGACTCCCGC	G/T	0	13974	-1	17	3	85	70	3	0.812834	A	B	A	B	B	B	-	-	A	A	A	B	A	B	A	A	A	B	A	B	A	A	B	B	A	A	A	A	B	-	A	A	A	B	B	-
*synopGBS1162	0	6B	TGCAGTCAGGTAATGACGCCATCCTCCACTCCCACTGCCTCGTGTGCTGCCGCCGACTCCCGC	T/C	0	13975	-1	24	3	85	70	3	0.812834	A	B	A	B	B	B	-	-	A	A	A	B	A	B	A	A	A	B	A	B	A	A	B	B	A	A	A	A	B	-	A	A	A	B	B	-
*synopGBS34	0	6B	TGCAGAACAGGTTGTTGCTGGGTCGATTCTTCTAGCCCGCGAGTTTTTTCCGTTTTATTCCTT	G/A	0	383	-1	24	2	82	81	3	0.855615	A	B	A	B	B	B	-	B	A	A	A	B	A	B	A	A	A	B	A	B	A	A	B	B	A	A	A	A	B	B	A	A	A	B	B	B
*synopGBS35	0	6B	TGCAGAACAGGTTGTTGCTGGTTCAATTCTTCTAGCCCGCGAGTTTTTTCCGTTTTATTCCTT	A/G	0	384	-1	24	1	81	81	3	0.850267	A	B	A	B	B	B	-	B	A	A	A	B	A	B	A	A	A	B	A	B	A	A	B	B	A	A	A	A	B	B	A	A	A	B	B	B
*synopGBS644	0	6B	TGCAGCTTGACCTTCGTTTTGAAGTTGATTCTGACACTGAGGATACATATGGGGCTGAAGAGG	A/G	0	9247	-1	27	3	86	79	8	0.839572	A	B	A	B	B	B	-	B	A	A	A	B	A	B	A	A	A	B	A	B	A	A	B	B	A	A	A	A	B	B	A	A	A	B	B	B
*synopGBS126	4.47	6B	TGCAGACCCTCAAACTGCGTGGCTGCCTAAATGGTTTGCCAGAATGGATCAAGGGGCTTGAGA	G/T	0	1237	-1	32	3	93	80	10	0.871658	A	B	A	B	B	B	B	B	A	A	A	A	A	B	A	A	A	B	A	B	A	A	B	B	A	A	A	A	B	B	A	A	A	B	B	B
*synopGBS406	18.63	6B	TGCAGCCAAATACTACTACGTGCTACTCTACATATTTCTGGCAAACACTTGGCAGGAAGGGCT	C/T	0	5141	-1	47	3	81	79	7	0.818182	A	B	B	B	B	B	B	B	A	A	A	A	A	B	A	A	B	B	A	B	A	A	B	B	A	A	B	A	B	B	-	A	A	B	B	B
*synopGBS407	18.63	6B	TGCAGCCAAATACTACTACGTGCTACTCTACATATTTCTGGCAAACACTTGGCAGGAAGGGCT	G/C	0	5142	-1	55	3	81	79	7	0.818182	A	B	B	B	B	B	B	B	A	A	A	A	A	B	A	A	B	B	A	B	A	A	B	B	A	A	B	A	B	B	-	A	A	B	B	B
*synopGBS658	32.23	6B	TGCAGCTTTTCTCGTGACGAAGAAAGAAAGAAAGCACAGCAATCAAATCCCAGGCCTCGGGCT	G/T	0	9423	-1	13	3	85	93	6	0.919786	A	B	B	B	B	B	A	B	B	A	A	A	A	B	A	A	B	B	A	B	A	A	B	B	A	A	B	A	A	B	B	B	A	B	B	B
*synopGBS98	38.91	6B	TGCAGACAATGAACGTTTCAGGGCCTTGGCTGACGACGAAACCGCCAAGAAAAAGGCCTCGGG	A/G	0	1000	-1	5	3	90	79	7	0.86631	A	B	B	B	B	B	A	B	B	A	A	A	A	B	A	A	B	B	A	B	A	A	B	B	B	A	B	A	A	B	B	B	A	B	B	B
*synopGBS1272	40.57	6B	TGCAGTGCACGCTTGATGACGCTGCCTGCACTGCACTGCCTACGTCTTTTTCACTGTCGAGCC	C/G	0	14808	-1	11	3	85	75	3	0.839572	A	B	B	B	B	B	A	B	B	A	A	A	A	B	A	A	B	B	A	B	A	A	B	B	B	A	B	A	A	B	B	B	A	B	B	B
*synopGBS829	44.99	6B	TGCAGGCGTGAATCGGCCATGACTCAGCCAGCAGAATGGCCGCTTTTCGCGGCGGACTCCACC	A/G	0	11233	-1	18	3	88	72	2	0.84492	A	B	B	B	B	B	A	B	B	A	A	A	A	B	A	A	B	B	A	B	B	A	B	B	B	A	B	A	A	B	B	B	A	B	B	B
*synopGBS821	47.6	6B	TGCAGGCGATCCCCACCACCGCCCTGCTCTCCAGGAGTTCCCCGCCGCCGCCCAGGGAGATCC	C/A	0	11015	-1	18	3	87	85	7	0.882353	A	B	B	B	B	B	A	B	B	A	A	A	A	B	A	A	B	B	A	B	B	A	B	B	B	A	B	A	A	B	B	B	A	B	B	B
*synopGBS830	47.6	6B	TGCAGGCGTTCCCCACCAACGCCCTGCTCTACAGGAGTTCCCCGCCGCCGCCCAGGGAGATCC	A/C	0	11253	-1	18	2	85	83	4	0.877005	A	B	B	B	B	B	A	B	B	A	A	A	A	B	A	A	B	B	A	B	B	A	B	B	B	A	B	A	A	B	B	B	A	B	B	B
*synopGBS1204	49.12	6B	TGCAGTCGTCAGCAAGATCTTCAGGGTGCAGCGCCGCGGTCACCACCACGAACGATGCTGCAT	G/C	0	14379	-1	37	3	94	88	9	0.925134	A	B	B	B	B	A	A	B	B	A	A	A	A	B	A	A	B	B	A	B	B	A	B	B	B	A	B	A	A	B	B	B	A	B	B	B
*synopGBS1205	49.12	6B	TGCAGTCGTCAGCAAGATCTTCAGGTTGCAGCGCCGCCGTCACCACCACGAACGATGCTGCAT	C/G	0	14380	-1	37	1	88	94	9	0.925134	A	B	B	B	B	A	A	B	B	A	A	A	A	B	A	A	B	B	A	B	B	A	B	B	B	A	B	A	A	B	B	B	A	B	B	B
*synopGBS1159	50.78	6B	TGCAGTCAGCTTTTCTGATCCGTATCACACTCACATTTAATTAGCAAGGCTCAGTTTGATCGG	C/G	0	13963	-1	51	3	78	77	5	0.802139	A	B	B	B	B	A	A	B	B	A	A	A	A	B	A	A	B	B	A	B	B	A	B	B	B	A	B	A	A	-	B	-	A	B	B	B
*synopGBS373	52.78	6B	TGCAGCAGGGCTTAAGCCCGCAGCACGTCGCCCCATCCACCGAGAAATGCACCACCTCCTTGC	G/T	0	4680	-1	61	1	82	74	5	0.807487	A	B	B	B	B	A	A	B	B	A	A	A	A	B	A	A	B	B	A	B	B	A	B	B	B	A	B	A	A	A	B	A	A	B	B	B
*synopGBS897	52.78	6B	TGCAGGGGAAGCTACAACCAGCGTCGAGGGAAGCTACAACGCGCAACCAGCGACATGCTTTTT	A/T	0	11827	-1	38	3	71	91	10	0.812834	A	B	B	B	B	A	A	B	B	A	A	A	A	B	A	A	B	B	A	B	B	A	B	B	B	A	B	A	A	A	B	A	A	B	B	B
*synopGBS971	52.78	6B	TGCAGGTCGTTGTAGCATTCGGCGTTGTGTTCGTAGCAAACCATGGTGATCCGTTACAATCTT	C/G	0	12491	-1	7	3	68	88	2	0.823529	A	B	B	B	B	A	A	B	B	A	A	A	A	B	A	A	B	B	A	B	B	A	B	B	B	A	B	A	A	A	B	A	A	B	B	B
*synopGBS1382	55.59	6B	TGCAGTTCAGCCCGACGGAGAAAACACAGGAGTACGTGGCCACCTTTGTGCAACGAACCACCG	A/C	0	15698	-1	8	3	75	84	4	0.828877	A	B	A	B	B	A	A	B	B	A	-	A	A	B	A	A	B	B	A	B	B	A	A	B	B	A	B	A	A	A	B	A	A	B	B	B
*synopGBS1068	58.2	6B	TGCAGTACATGGTGTGCCTCATCCAGGTCCGCCCCGACGCGGGTTGGCTCCCCTGCTTCGACC	C/T	0	13327	-1	58	2	81	83	4	0.855615	A	B	A	B	B	A	A	B	B	B	B	B	A	B	A	A	B	B	A	B	B	A	A	B	B	A	B	A	A	A	B	A	A	B	B	B
*synopGBS953	58.2	6B	TGCAGGTCAATTCACCTGACTCCGCAAGACTACCCATCTCAAACTTAATCCAATCCAACCTGT	A/G	0	12314	-1	25	3	80	82	6	0.834225	A	B	A	B	B	A	A	B	B	B	B	B	A	B	A	A	B	B	A	B	B	A	A	B	B	A	B	A	A	A	B	A	A	B	B	B
*synopGBS685	59.09	6B	TGCAGGAAGCTGTTTCTTGTCCAGGCAGGCCGTGGTAAAATGGTCATGTCGGTCGTGCCTGTG	A/T	0	9652	-1	22	3	75	85	2	0.84492	A	B	A	B	B	A	A	B	B	B	B	B	A	B	A	A	B	B	A	B	B	A	A	B	B	A	B	A	A	A	B	A	A	B	B	B
*synopGBS274	60.74	6B	TGCAGATGACGTTGCCCACCACCGCGACAGTGCCGAGGTATACTTCTTCTAATCTTCTTCCAG	C/T	0	2868	-1	9	3	81	88	5	0.877005	A	B	A	B	B	A	A	B	B	B	B	B	A	B	A	A	B	B	A	B	B	A	A	B	B	A	B	A	A	A	B	A	A	B	B	B
*synopGBS464	60.74	6B	TGCAGCCTAACTGCCCGAGCCTCCTGTGTACGTGCCTGTGGCTGTGGCCAACAAATCTCGTGT	C/T	0	6267	-1	14	3	81	82	5	0.84492	A	B	A	B	B	A	A	B	B	B	B	B	A	B	A	A	B	B	A	B	B	A	A	B	B	A	B	A	A	A	B	A	A	B	B	B
*synopGBS503	60.74	6B	TGCAGCGACAATCACAACTAGGGGTTCACCTGTGAGAAGCGACAGGGAACGCACGTCGTGTTG	A/C	0	6757	-1	47	2	98	79	11	0.887701	A	B	A	B	B	A	A	B	B	B	B	B	A	B	A	A	B	B	A	B	B	A	A	B	B	A	B	A	A	A	B	A	A	-	B	B
*synopGBS995	60.74	6B	TGCAGGTTCAGATCATCAAACTTGGCGACCATGTGTTCAAGGATGTACGCCCCTGTTGTACTG	C/T	0	12873	-1	29	3	77	95	4	0.898396	A	B	A	B	B	A	A	B	B	B	B	B	A	B	A	A	B	B	A	B	B	A	A	B	B	A	B	A	A	A	B	A	A	-	B	B
*synopGBS996	60.74	6B	TGCAGGTTCAGATCATCAAACTTGGCGACCATGTGTTCAAGGATGTACGCCCCTGTTGTACTG	A/G	0	12874	-1	30	3	77	95	4	0.898396	A	B	A	B	B	A	A	B	B	B	B	B	A	B	A	A	B	B	A	B	B	A	A	B	B	A	B	A	A	A	B	A	A	-	B	B
*synopGBS997	60.74	6B	TGCAGGTTCAGATCATCAAACTTGGCGACCATGTGTTCAAGGATGTACGCCCCTGTTGTACTG	A/G	0	12875	-1	59	3	77	95	4	0.898396	A	B	A	B	B	A	A	B	B	B	B	B	A	B	A	A	B	B	A	B	B	A	A	B	B	A	B	A	A	A	B	A	A	-	B	B
*synopGBS1281	61.5	6B	TGCAGTGCCAATGCCAGTGTGCCATGCCACGGACCGCGATGCGCACCAATGTTCGGAGGTTCG	C/T	0	14882	-1	13	3	84	81	0	0.882353	A	B	A	B	B	A	A	B	B	B	B	B	A	B	A	A	B	B	A	B	B	A	A	B	B	A	B	A	A	A	B	A	A	A	B	B
*synopGBS331	65.93	6B	TGCAGCAAAAATAAGCGCCCGTTTCTCCTGTTGCCGCAAACGGGCGCATACCCCCGCGCCGCG	C/T	0	3449	-1	26	3	78	73	1	0.802139	A	B	A	B	B	A	A	B	B	B	B	B	A	B	A	A	B	B	A	B	B	A	A	B	B	A	B	A	B	A	B	A	A	A	B	B
*synopGBS332	65.93	6B	TGCAGCAAAAATAAGCGCCCGTTTCTCCTGTTGCCGCAAACGGGCGCATACCCCCGCGCCGCG	C/A	0	3450	-1	50	3	81	70	1	0.802139	A	B	A	B	B	A	A	B	B	B	B	B	A	B	A	A	B	B	A	B	B	A	A	B	B	A	B	A	B	A	B	A	A	A	B	B
*synopGBS345	65.93	6B	TGCAGCAATTAACAATAGCGGACTCAAGTGTCGAGCATCAGCACTGCCGTCGGGCCCAATCTT	A/G	0	3844	-1	33	3	83	74	3	0.823529	A	B	A	B	B	A	A	B	B	B	B	B	A	B	A	A	B	B	A	B	B	A	A	B	B	A	B	A	B	A	B	A	A	A	B	B
*synopGBS400	65.93	6B	TGCAGCATTTGCTGCTTCCAGATCAATCACGCCATGAGCATCACCGACAAGTTGCGTTTTTTA	A/G	0	5112	-1	48	3	80	92	5	0.893048	A	B	A	B	B	A	A	B	B	B	B	B	A	B	A	A	B	B	A	B	B	A	A	B	B	A	B	A	B	A	B	A	A	A	B	B
*synopGBS401	66.75	6B	TGCAGCATTTGGTGGATAAGGTGGCCGACAAGTTACCAAGTTGGCAAGCCTCTCTACTACACT	A/G	0	5113	-1	45	1	75	79	2	0.812834	A	B	A	B	B	A	A	B	B	B	B	B	A	B	A	A	B	B	A	B	B	A	A	B	B	A	B	A	B	A	B	A	A	A	B	B
*synopGBS471	66.75	6B	TGCAGCCTCCGATCACTGCCCCCTTGTCGTGGGCTGCTCCCTCTGCTCGCCAGGGAAGAGAAG	C/T	0	6392	-1	20	3	91	82	2	0.914439	A	B	A	B	B	A	A	B	B	B	B	B	A	B	A	A	B	B	A	B	B	A	A	B	B	A	B	A	B	A	B	A	A	A	B	B
*synopGBS472	66.75	6B	TGCAGCCTCCGATCACTGCCCCCTTGTCGTGGGCTGCTCCCTCTGCTCGCCAGGGAAGAGAAG	T/C	0	6393	-1	24	3	91	82	2	0.914439	A	B	A	B	B	A	A	B	B	B	B	B	A	B	A	A	B	B	A	B	B	A	A	B	B	A	B	A	B	A	B	A	A	A	B	B
*synopGBS567	68.23	6B	TGCAGCTATTCATGCTGCTCTTCTTAACCTCTCCCGCCACCCCATGCACCGAGCAGGAGAAGC	A/G	0	8006	-1	26	3	87	86	6	0.893048	A	B	A	B	B	A	A	B	B	B	B	B	B	B	A	A	B	B	A	B	B	A	A	B	B	A	B	A	B	A	B	A	A	A	B	B
*synopGBS568	68.23	6B	TGCAGCTATTCATGCTGCTCTTCTTAACCTCTCCCGCCACCCCATGCACCGAGCAGGAGAAGC	C/G	0	8007	-1	62	2	87	82	2	0.893048	A	B	A	B	B	A	A	B	B	B	B	B	B	B	A	A	B	B	A	B	B	A	A	B	B	A	B	A	B	A	B	A	A	A	B	B
*synopGBS599	69.82	6B	TGCAGCTCGGTGTCCCTCGCCGCCAGCATCCGCTTCAGGACGTTGCTCTCGTCCTCGATCGCG	C/T	0	8407	-1	45	2	78	82	1	0.850267	A	B	A	B	B	A	A	B	B	B	B	B	A	B	A	A	B	B	A	B	B	A	A	B	B	A	B	A	B	A	B	A	A	A	B	B
*synopGBS653	71.54	6B	TGCAGCTTTCCATGGACCTATGCAGCGGCGACAGGTAGTTGGACTGGCCGAAATGGGCAATGT	A/C	0	9379	-1	15	3	78	87	5	0.855615	A	B	A	B	B	A	A	B	B	B	B	B	B	B	A	A	B	B	A	B	B	A	A	B	B	A	B	A	B	A	B	A	A	A	B	B
*synopGBS673	72.38	6B	TGCAGGAAATCGTCCATGTCCGCCATGTCTCGCATCATCGCTAGGTCGTCGTCCTGCGCCGAG	A/G	0	9516	-1	15	3	85	76	1	0.855615	A	B	A	B	B	A	A	B	B	B	B	B	A	B	A	A	B	B	A	B	B	A	A	B	B	A	B	A	B	A	B	A	A	A	B	B
*synopGBS710	73.19	6B	TGCAGGAGAAGGAGGCCGTCAGGGGAGTCGAGCACGGAGTGGTCCTCGAAGCATGGCACTTGC	A/G	0	9973	-1	8	3	84	81	3	0.86631	A	B	A	B	B	A	A	B	B	B	B	B	B	B	A	A	B	B	A	B	B	A	A	B	B	A	B	A	B	A	B	A	A	A	B	B
*synopGBS711	73.19	6B	TGCAGGAGAAGGAGGCCGTCAGGGGAGTCGAGCACGGAGTGGTCCTCGAAGCATGGCACTTGC	G/C	0	9974	-1	24	3	84	81	3	0.86631	A	B	A	B	B	A	A	B	B	B	B	B	B	B	A	A	B	B	A	B	B	A	A	B	B	A	B	A	B	A	B	A	A	A	B	B
*synopGBS712	73.19	6B	TGCAGGAGAAGGAGGCCGTCAGGGGAGTCGAGCACGGAGTGGTCCTCGAAGCATGGCACTTGC	G/A	0	9975	-1	47	3	84	81	3	0.86631	A	B	A	B	B	A	A	B	B	B	B	B	B	B	A	A	B	B	A	B	B	A	A	B	B	A	B	A	B	A	B	A	A	A	B	B
*synopGBS751	74.09	6B	TGCAGGATGTCTGGAAACTCGTTACAAGTAACCATGAAGCAACTGGAGAAAGCATCGACGCCA	C/T	0	10372	-1	10	3	84	76	10	0.802139	A	B	A	B	B	A	A	B	B	B	B	B	A	B	A	A	B	B	A	B	B	A	A	B	B	A	B	A	B	A	B	A	A	A	B	B
*synopGBS986	74.09	6B	TGCAGGTGTAACAGAGCCCAATCCTGGCACAATTAAGCACGGCGACGAGGGAGGTTACTAGCT	A/G	0	12759	-1	14	2	88	70	0	0.84492	A	B	A	B	B	A	A	B	B	B	B	B	A	B	A	A	B	B	A	B	B	A	A	B	B	A	B	A	B	A	B	A	A	A	B	B
*synopGBS1013	74.89	6B	TGCAGGTTGCACCCTACCACGCTAACACGACAGACTAGATCTGACCTCCCGACCCGTCGGGCG	A/G	0	12956	-1	31	3	92	79	2	0.903743	A	B	A	B	B	A	A	B	B	B	B	B	A	B	A	A	B	B	A	B	B	A	A	B	B	A	B	A	B	A	B	A	A	A	B	B
*synopGBS1044	75.68	6B	TGCAGGTTTTCGCACAACACAGATCGATGGAAGAAGGAGAACAGCAAGTCAGACGGCAGATCC	A/T	0	13086	-1	16	3	88	78	4	0.86631	A	B	A	B	B	A	A	B	B	B	B	B	A	B	A	A	B	B	A	B	B	A	A	B	B	A	B	A	B	A	B	A	A	A	B	B
*synopGBS1319	76.43	6B	TGCAGTGGGGTGCAGCACAGTGCTCCGCCACTGCTAGCGCTAGGTAGGAGAGTGGTAGTACTC	G/C	0	15193	-1	46	3	88	84	0	0.919786	A	B	A	B	B	A	A	B	B	B	B	B	A	B	A	A	B	B	A	B	B	A	A	B	B	A	B	A	B	A	B	A	A	A	B	B
*synopGBS1324	76.43	6B	TGCAGTGGTGTGCAGCACAGTGCTCCGCCACTGCTAGCGCTAGGTACGAGAGTGGGAGTACTC	C/G	0	15245	-1	46	2	84	88	0	0.919786	A	B	A	B	B	A	A	B	B	B	B	B	A	B	A	A	B	B	A	B	B	A	A	B	B	A	B	A	B	A	B	A	A	A	B	B
*synopGBS1334	77.2	6B	TGCAGTGTGAGACATGCACTGAATATTTTGGCATGTTATATGCAGTGTAGACATGGGCAAGTG	C/T	0	15352	-1	51	2	88	75	3	0.855615	A	B	A	B	B	A	A	B	B	B	B	B	B	B	A	A	B	B	A	B	B	A	A	B	B	A	B	A	B	A	B	A	-	A	B	B
*synopGBS1461	78.89	6B	TGCAGTTGTTTGTTCCCTCCCGTTTGGCTATTGTACAGGCACTGGAGACATCCTAATCACAAA	A/C	0	16277	-1	58	3	76	89	6	0.850267	A	B	A	-	B	A	A	B	B	B	B	B	A	B	A	A	B	B	A	B	B	A	A	B	B	A	B	A	B	A	B	A	-	A	B	B
*synopGBS1235	86.41	6B	TGCAGTCTTGCGCATGGGGACGCGGGCCTCGCGGAAGAGAGCCGATGACGACACGTTCTTCAC	G/C	0	14572	-1	32	3	79	88	4	0.871658	A	B	A	A	B	A	-	B	B	A	B	B	B	B	A	A	B	A	A	B	B	A	A	B	B	A	B	A	B	A	B	A	B	A	B	B
*synopGBS592	86.41	6B	TGCAGCTCGAAAAGAGACGAAATGCGATGCGGGCGAGACTAGGGTTTACACTCTCCTCCGATC	C/G	0	8286	-1	17	2	86	74	2	0.84492	A	B	A	A	B	A	B	B	B	A	B	B	B	B	A	A	B	A	A	B	B	A	A	B	B	A	B	A	B	A	B	A	B	A	B	B
*synopGBS686	86.41	6B	TGCAGGAAGGCGATCATCTTGCCTTGCCGCAGCTCCATGTCGACCGCTCGGCGCTCCAGGGCT	A/T	0	9664	-1	30	2	88	83	3	0.898396	A	B	A	A	B	A	B	B	B	A	B	B	B	B	A	A	B	A	A	B	B	A	A	B	B	A	B	A	B	A	B	A	B	A	B	B
*synopGBS1255	87.21	6B	TGCAGTGAGCCTCTGCGGAGCCACCAATGCTCTCTGACCTGAGTCGCCTAGCCTCCAAGTTTC	C/T	0	14696	-1	33	3	88	86	3	0.914439	A	B	A	A	B	A	B	B	B	A	B	B	B	B	A	A	B	B	A	B	B	A	A	B	B	A	B	A	B	A	B	A	B	A	B	B
*synopGBS619	87.21	6B	TGCAGCTGTCTACGCCAGAGCACGAATCTTATACTCGCTGAACGGGCCAGATCAGAGGGAGGC	C/T	0	8968	-1	27	3	87	81	4	0.877005	A	B	A	A	B	A	B	B	B	A	B	B	B	B	A	A	B	B	A	B	B	A	A	B	B	A	B	A	B	A	B	A	B	A	B	B
*synopGBS637	87.21	6B	TGCAGCTTCGCCAACAATGGTAGATGTCAGATCAGAAATAAACTGCCTTCGATGCTCCGCCAT	A/C	0	9166	-1	23	3	76	78	2	0.812834	A	B	A	A	B	A	B	B	B	A	B	B	B	B	A	A	B	B	A	B	B	A	A	B	B	A	B	A	B	A	B	A	B	A	B	B
*synopGBS924	88.13	6B	TGCAGGTAATAGGAGGGCGCCTCCGACCAGGTAATTCTCAGCCACTGGCCATTTCGAACGCCA	A/G	0	12129	-1	57	3	89	83	13	0.850267	A	B	A	A	B	A	B	B	B	A	B	B	B	B	A	A	B	A	A	B	B	A	A	B	B	A	B	A	B	A	B	A	B	A	B	B
*synopGBS968	88.13	6B	TGCAGGTCGAGGTCCGAGCGCTCGACGCGCTTGTGGGCGATGAAGTGGAGCTGATGGGCGGGC	A/C	0	12441	-1	53	3	78	79	4	0.818182	A	B	A	A	B	A	B	B	B	A	B	B	B	B	A	A	B	A	A	B	B	A	A	B	B	A	B	A	B	A	B	A	B	A	B	B
*synopGBS316	90.81	6B	TGCAGATTCTGAGTTTGCTGCGGCTTAAGTCGCACATCCACGGGGCGCGACCACTGGAAGCAG	G/A	0	3244	-1	43	3	87	80	3	0.877005	A	B	A	A	B	A	B	B	B	A	B	B	B	B	A	A	B	A	A	B	B	A	A	B	B	A	B	A	B	A	B	A	B	A	B	B
*synopGBS317	90.81	6B	TGCAGATTCTGAGTTTGCTGCGGCTTAAGTCGCACATCCACGTAGCGCGACCACTGGAAGCAG	A/G	0	3245	-1	43	1	80	87	3	0.877005	A	B	A	A	B	A	B	B	B	A	B	B	B	B	A	A	B	A	A	B	B	A	A	B	B	A	B	A	B	A	B	A	B	A	B	B
*synopGBS593	90.81	6B	TGCAGCTCGACCATGACCTGCAAGCTTCGCCATCTCCTAGACGTCAACAAGCCTTATGATGTC	C/T	0	8294	-1	7	3	88	93	8	0.925134	A	B	A	A	B	A	B	B	B	A	B	B	B	B	A	A	B	A	A	B	B	A	A	B	B	A	B	A	B	A	B	A	B	A	B	B
*synopGBS6	90.81	6B	TGCAGAAAAAGATCAACGACGCCACATCGTGCCACCTGCATCCGTGGAGGCCTGAACTTGGCA	A/G	0	23	-1	23	2	75	102	11	0.887701	A	B	A	A	B	A	B	B	B	A	B	B	B	B	A	A	B	A	A	B	B	A	A	B	B	A	B	A	B	A	B	A	B	A	B	B
*synopGBS960	90.81	6B	TGCAGGTCCAGCGCTCTTCTGCGGTACGACGTTCTGGGTACGCAGGGTCGAGGCTCCTTGTCG	C/T	0	12376	-1	33	1	82	86	4	0.877005	A	B	A	A	B	A	B	B	B	A	B	B	B	B	A	A	B	A	A	B	B	A	A	B	B	A	B	A	B	A	B	A	B	A	B	B
*synopGBS900	92.52	6B	TGCAGGGGATGGACCGCGCTCCATGGCCTTGAGCTGACAGAGGTCAAGGATATCTGTTGCTTC	G/T	0	11861	-1	5	3	74	77	0	0.807487	A	B	A	A	B	A	B	B	A	B	B	B	B	B	A	A	A	A	A	B	B	A	A	B	B	A	B	A	B	A	B	A	B	A	-	B
*synopGBS286	108.03	6B	TGCAGATGGAAGCGAGCTCTGCGTCCATGGCCTCCTTCCAGCTTGGATCGTTTAGAACCGCGG	A/G	0	3008	-1	46	3	75	82	1	0.834225	A	B	A	A	B	A	B	B	A	B	B	B	A	A	A	A	A	A	A	B	B	A	A	B	B	A	B	A	B	A	B	A	B	A	A	B
*synopGBS1479	114.32	6B	TGCAGTTTGGTTTTCGACGTACCCAGACAAAATACGATGGCGCTGGGGCGTAGGGGCGTCGAA	C/T	0	16502	-1	63	2	77	90	7	0.855615	A	B	A	A	B	A	B	B	A	B	B	B	A	A	A	A	A	A	A	B	B	A	A	B	B	A	B	A	B	B	-	A	B	A	A	B
*synopGBS261	116.78	6B	TGCAGATCTCCGCAGCTGGCTTCACACCCAGGGCGTCAGCCACACGAACTGATAGACGGTAAA	G/T	0	2781	-1	57	3	95	88	10	0.925134	A	B	A	A	B	A	B	B	A	B	B	B	A	A	A	A	A	A	A	B	B	A	A	B	B	A	B	A	B	B	A	A	B	A	A	B
*synopGBS704	126.12	6B	TGCAGGACGTGGTCGTGTTCTTCAAGCGGTTCCCCAACGTCGACATGACTTACGAGGCCCGCG	C/T	0	9922	-1	7	3	84	80	3	0.860963	A	B	B	A	B	A	A	B	A	B	A	-	A	A	A	A	A	A	A	B	B	A	A	B	A	-	B	A	B	B	A	A	-	A	A	B
*synopGBS705	126.12	6B	TGCAGGACGTGGTCGTGTTCTTCAAGCGGTTCCCCAACGTCGACATGACTTACGAGGCCCGCG	G/C	0	9923	-1	10	3	84	80	3	0.860963	A	B	B	A	B	A	A	B	A	B	A	-	A	A	A	A	A	A	A	B	B	A	A	B	A	-	B	A	B	B	A	A	-	A	A	B
*synopGBS749	126.12	6B	TGCAGGATGTCGTCGTGTTCTTCAAGCGCTTCCCCAACGTCGACATGACTTACGAAGTCCGCG	C/G	0	10370	-1	28	2	90	80	4	0.887701	A	B	B	A	B	A	A	B	A	B	A	-	A	A	A	A	A	A	A	B	B	A	A	B	A	-	B	A	B	B	A	A	-	A	A	B
*synopGBS750	126.12	6B	TGCAGGATGTCGTCGTGTTCTTCAAGCGCTTCCCCAACGTCGACATGACTTACGAAGTCCGCG	A/G	0	10371	-1	55	2	90	80	4	0.887701	A	B	B	A	B	A	A	B	A	B	A	-	A	A	A	A	A	A	A	B	B	A	A	B	A	-	B	A	B	B	A	A	-	A	A	B
*synopGBS1025	131.3	6B	TGCAGGTTGTGTAGTTGGCGAGCGGGCTGCTGGACAAGCATGAAGTTACCATGCACACAGCGA	G/A	0	13028	-1	59	3	86	81	6	0.860963	A	B	B	A	B	A	A	B	A	B	A	A	A	A	A	A	A	A	A	B	B	A	A	B	A	B	B	A	B	B	A	A	A	A	A	B
*synopGBS1026	131.3	6B	TGCAGGTTGTGTAGTTGGCGAGCGGTCTGCTGGACAAGCATGAAGTTACCATGCACACAACGA	A/G	0	13029	-1	59	1	81	86	6	0.860963	A	B	B	A	B	A	A	B	A	B	A	A	A	A	A	A	A	A	A	B	B	A	A	B	A	B	B	A	B	B	A	A	A	A	A	B
*synopGBS959	131.3	6B	TGCAGGTCCAGCGCCTCGCCGCAGAGCTTGTCGGGGCGGGCGCTGACGAGCGCGATCTCATCG	A/G	0	12375	-1	22	3	98	66	3	0.860963	A	B	B	A	B	A	A	B	A	B	A	A	A	A	A	A	A	A	A	B	B	A	A	B	A	B	B	A	B	B	A	A	A	A	A	B
*synopGBS731	132.93	6B	TGCAGGAGTGCGGGCTAGGTGCTTGTGACATTGCCAAGCTCTACGTACTTATGCCATCGACGC	C/T	0	10229	-1	33	1	79	93	6	0.887701	A	B	B	A	B	A	A	B	A	B	A	A	A	A	A	A	A	A	A	B	B	A	A	B	A	B	B	A	B	B	A	A	A	A	A	B
*synopGBS90	134.7	6B	TGCAGACAAAAATCTCATCTAAGCATCTATGGGAGGGAGCAAGCACGAGCTGAAGTTGAATAC	C/G	0	952	-1	6	3	69	87	4	0.812834	A	B	B	A	B	A	A	B	A	B	A	A	A	A	A	A	A	A	A	B	B	A	A	B	A	B	B	A	B	B	A	A	A	A	A	B
*synopGBS458	135.59	6B	TGCAGCCGCCACAATCTCCTTGCCTGTATTCGACTTGCCCTTCAAGTGCTTTCCGAAGATCAC	C/T	0	6086	-1	11	3	103	55	2	0.834225	A	B	B	A	B	A	A	B	A	B	A	A	A	A	A	A	A	A	A	B	B	A	A	B	A	B	B	A	B	B	A	A	A	A	A	B
*synopGBS459	135.59	6B	TGCAGCCGCCACAATCTCCTTGCCTGTATTCGACTTGCCCTTCAAGTGCTTTCCGAAGATCAC	G/C	0	6087	-1	54	3	103	55	2	0.834225	A	B	B	A	B	A	A	B	A	B	A	A	A	A	A	A	A	A	A	B	B	A	A	B	A	B	B	A	B	B	A	A	A	A	A	B
*synopGBS596	135.59	6B	TGCAGCTCGATGTGCAACAACACCATCAAGGGAGTCGCGTCGTCGAGCAACTGGCATTTCTGC	A/G	0	8335	-1	19	3	80	83	9	0.823529	A	B	B	A	B	A	-	B	A	B	A	A	A	A	A	A	A	A	A	B	B	A	A	B	A	B	B	A	B	B	A	A	A	A	A	B
*synopGBS597	135.59	6B	TGCAGCTCGATGTGCAACAACACCATCAAGGGAGTCGCGTCGTCGAGCAACTGGCATTTCTGC	A/G	0	8336	-1	28	3	80	83	9	0.823529	A	B	B	A	B	A	-	B	A	B	A	A	A	A	A	A	A	A	A	B	B	A	A	B	A	B	B	A	B	B	A	A	A	A	A	B
*synopGBS615	135.59	6B	TGCAGCTGCTGGAAGGACGGGGGGTGGTGGTAGATGGGGACCCCTCTTATAGGCTTGAGCAAG	C/G	0	8785	-1	45	3	89	79	12	0.834225	A	B	B	A	B	A	-	B	A	B	A	A	A	A	A	A	A	A	A	B	B	A	A	B	A	B	B	A	B	B	A	A	A	A	A	B
*synopGBS29	139.16	6B	TGCAGAAATTGGAACAAAAATCGTGTCTTTGGTATCGGAACGGTGAATGGTGGGAGACGGGGG	T/C	0	314	-1	32	3	83	84	3	0.877005	A	B	B	A	A	A	-	B	-	B	-	A	A	A	A	A	A	A	B	B	B	A	A	-	A	-	B	A	B	B	-	A	A	-	A	B
*synopGBS30	139.16	6B	TGCAGAAATTGGAACAAAAATCGTGTCTTTGGTATCGGAACGGTGAATGGTGGGAGACGGGGG	G/C	0	315	-1	58	3	83	84	3	0.877005	A	B	B	A	A	A	-	B	-	B	-	A	A	A	A	A	A	A	B	B	B	A	A	-	A	-	B	A	B	B	-	A	A	-	A	B
*synopGBS934	0	6D	TGCAGGTAGCATTATTAGGCCCAGCTTCGGCGTGTCGCAGCACCCCTTTCAATTTCCTTCCCA	G/T	0	12212	-1	36	3	79	81	4	0.834225	A	B	B	A	B	B	-	-	B	-	B	-	A	A	A	A	B	A	A	A	-	A	A	A	A	A	B	A	B	A	-	B	B	B	-	A
*synopGBS1345	1.55	6D	TGCAGTGTTGTGCCAAGCATAATCCTCTAGGATCTTCATCGCGAGCAAAAAAACTCCAGCCGC	A/G	0	15427	-1	28	2	91	89	5	0.935829	A	B	B	A	B	B	A	A	B	B	B	B	A	A	A	A	B	A	A	A	A	A	A	A	A	A	B	A	B	A	-	B	B	B	A	A
*synopGBS1422	1.55	6D	TGCAGTTGATGATAGCTAAACCCACGGAACCCTACGTGGATAACCAGAGGCCGCGCTGTACCT	C/G	0	16008	-1	51	3	85	79	5	0.850267	A	B	B	A	B	B	A	A	B	B	B	B	A	A	A	A	B	A	A	-	A	A	A	A	A	A	B	A	B	A	A	B	B	B	A	A
*synopGBS907	1.55	6D	TGCAGGGTCAAGGGGGCTGTGGGATACGCCCAACCAGTTCTTTTTCACCAAGTCTTGGAACTG	C/T	0	11984	-1	29	2	85	77	11	0.807487	A	B	B	A	B	B	A	A	B	B	B	B	A	A	A	A	B	A	A	-	A	A	A	A	A	A	B	A	B	A	A	B	B	B	A	A
*synopGBS1423	2.48	6D	TGCAGTTGATGATAGCTAAACCCACGGAACCCTACGTGGATAACCAGAGGCCGCGCTGTACCT	C/A	0	16009	-1	61	3	91	78	10	0.850267	A	B	B	A	B	B	A	A	-	B	B	B	A	A	A	A	B	A	A	-	A	A	A	A	A	A	A	A	B	A	A	-	B	B	A	A
*synopGBS168	25.44	6D	TGCAGACTCCGATGGCGCGCCCCAGCTGCCCTCGTGATCCCGCTCGCGGCCTAGCCGACTTGT	C/G	0	1536	-1	20	3	86	89	12	0.871658	A	B	B	A	B	B	B	A	-	A	B	B	A	A	B	A	B	A	B	-	A	A	A	A	A	A	B	A	A	B	B	A	B	B	A	A
*synopGBS169	25.44	6D	TGCAGACTCCGATGGCGCGCCCCAGCTGCCCTCGTGATCCCGCTCGCGGCCTAGCCGACTTGT	T/C	0	1537	-1	37	3	86	89	12	0.871658	A	B	B	A	B	B	B	A	-	A	B	B	A	A	B	A	B	A	B	-	A	A	A	A	A	A	B	A	A	B	B	A	B	B	A	A
*synopGBS1287	26.32	6D	TGCAGTGCCTCGCGCCACTTTTCGAAGACCGTCAGGAGGCCATCCTGCCTCCCCCTGCTCCAA	C/T	0	14928	-1	22	1	77	80	5	0.812834	A	B	B	A	B	B	B	A	-	A	B	B	A	A	B	A	B	A	B	-	A	A	A	A	A	A	B	A	A	B	B	A	B	B	A	A
*synopGBS389	31.88	6D	TGCAGCATGCTGCCATGCTAGCTGCCCCCGCATGCTCAATGAGGTGAGCAGCTGATTGGAGTC	A/G	0	4986	-1	37	3	77	81	3	0.828877	A	B	B	A	B	B	B	A	-	A	B	B	A	A	B	A	B	A	B	B	A	A	A	A	A	A	B	A	A	B	B	A	B	B	B	A
*synopGBS1414	32.76	6D	TGCAGTTGACCTCACCGCTAGCTGCTGCTCGGCCCAGTCTCGGTGGATCCGCTGGCAGGGGCC	C/T	0	15977	-1	33	3	84	81	3	0.86631	A	B	B	A	B	B	B	A	-	A	B	B	A	A	B	A	B	A	B	B	A	A	A	A	A	A	B	A	A	B	B	A	B	B	B	A
*synopGBS733	32.76	6D	TGCAGGATATCCTGAGGGGTTTTCCGCGAGACCTAAAACCTCTGGCGATTAGGGGTTCGAGCG	G/A	0	10263	-1	62	3	82	77	6	0.818182	A	B	B	A	B	B	B	A	-	A	B	B	A	A	B	A	B	A	B	B	A	A	A	A	A	A	B	A	A	B	B	A	B	B	B	A
*synopGBS734	32.76	6D	TGCAGGATATCCTGAGGGGTTTTCCGCGAGACCTAAAACCTCTGGCGATTAGGGTTTCGAGCA	A/G	0	10264	-1	62	1	77	82	6	0.818182	A	B	B	A	B	B	B	A	-	A	B	B	A	A	B	A	B	A	B	B	A	A	A	A	A	A	B	A	A	B	B	A	B	B	B	A
*synopGBS149	34.51	6D	TGCAGACGAGGGGATGTGGTGATTATCTTGTGTTTCCCTGCCTACTCCCCATCTGGTTGCTCC	C/T	0	1365	-1	59	2	77	81	4	0.823529	A	B	B	A	B	B	B	A	-	A	B	B	A	A	B	A	B	A	B	B	A	A	A	A	A	A	B	A	A	B	B	A	B	B	B	A
*synopGBS150	34.51	6D	TGCAGACGAGGTGATGTGGGGATTATCTTGTGTTTCCCTGCCTACTCCCCATCTGGTTGTTCC	T/C	0	1368	-1	59	2	81	76	4	0.818182	A	B	B	A	B	B	B	A	-	A	B	B	A	A	B	A	B	A	B	B	A	A	A	A	A	A	B	A	A	B	B	A	B	B	B	A
*synopGBS1122	35.43	6D	TGCAGTAGGTATTGAAAGTGTGTTGGGCATTGCCAGCTCGAGAGCCTGTGATGGAGGCTGAAA	A/G	0	13628	-1	40	3	74	84	7	0.807487	A	B	B	A	B	B	B	A	-	A	B	B	A	A	B	A	B	A	B	B	A	A	A	A	A	A	B	A	A	B	B	A	B	B	B	A
*synopGBS1123	35.43	6D	TGCAGTAGGTATTGAAAGTGTGTTGGGCATTGCCAGCTCGAGAGCCTGTGATGGAGGCTGAAA	G/A	0	13629	-1	59	3	74	84	7	0.807487	A	B	B	A	B	B	B	A	-	A	B	B	A	A	B	A	B	A	B	B	A	A	A	A	A	A	B	A	A	B	B	A	B	B	B	A
*synopGBS609	36.31	6D	TGCAGCTGCATATTCTATCCTTTAAGACTGACATGGTGGAGTATTGTACTGCCCTCCCCGATG	G/T	0	8652	-1	29	3	80	84	9	0.828877	A	B	B	A	B	B	B	A	-	A	B	B	A	-	B	A	B	A	B	B	A	A	A	A	A	A	B	A	A	B	B	A	B	B	B	A
*synopGBS1228	41.08	6D	TGCAGTCTGCCCTGATTATGTAGGCGCCCCTGGGGCCCCGAGGCAGCTCGGCTGCCCAGGGGG	A/G	0	14514	-1	44	3	91	67	7	0.807487	A	B	B	-	B	B	B	A	-	A	B	-	-	-	B	A	B	A	B	B	A	A	A	A	-	A	B	A	A	B	B	A	B	B	B	-
*synopGBS754	66.73	6D	TGCAGGATTTATGTATCGGGTCGTGCCGTCATTGAACTCAAGCGCAAACATTGGTTACCCACT	A/T	0	10412	-1	39	3	72	94	9	0.839572	A	B	B	-	B	B	B	A	-	A	-	-	B	B	A	B	B	A	B	B	A	B	A	A	B	A	B	A	A	B	B	B	B	B	B	B
*synopGBS322	74.15	6D	TGCAGATTGCGCAACGGTCCCGACTCGGCTGCCAGAGCGAAGCAAAGGCAACAGCGGCGGGGG	C/T	0	3298	-1	11	3	89	73	4	0.84492	A	B	A	-	B	B	B	A	-	A	-	A	B	B	A	B	B	A	B	B	A	B	A	A	B	A	B	A	A	B	B	B	B	B	B	B
*synopGBS1323	75.01	6D	TGCAGTGGTGGTGACGGGGATGTCTTTGCCCATGCTTGGCCGCAGGCTAAAGCTTGAGCACAA	A/C	0	15240	-1	19	2	94	77	9	0.86631	A	B	A	B	B	B	B	A	A	A	A	A	B	B	A	B	B	A	B	B	A	B	A	A	B	A	B	A	A	B	B	B	B	B	B	B
*synopGBS241	79.36	6D	TGCAGATCGACTTCAAGCTCGAGGATGGCCTCACAACGACAAGTGCAAAGTATGTGACCAGGA	G/T	0	2693	-1	49	3	97	60	4	0.818182	A	B	A	B	B	B	B	B	A	A	A	A	B	B	A	B	B	A	B	B	A	B	A	A	B	B	B	A	A	B	B	B	B	B	-	B
*synopGBS965	79.36	6D	TGCAGGTCCTGGCGGCGGAGTTGCCGACGGCGGCGGCGCCAAGATGCTCCACCTCGCCGACGG	C/T	0	12424	-1	36	2	77	95	8	0.877005	A	B	A	B	B	B	B	B	A	A	A	A	B	B	A	B	B	A	B	B	A	B	A	A	B	B	B	A	A	B	B	B	B	B	A	B
*synopGBS1413	81.04	6D	TGCAGTTGACAGCCATGCTCCAAGTACCAATGAACAGGGAATGGGCGCCGATGCTTGTCAATG	C/G	0	15972	-1	27	3	72	96	6	0.86631	A	B	A	B	B	B	B	B	-	A	A	A	B	B	A	B	B	A	B	B	A	B	A	A	B	B	B	A	A	B	B	B	A	B	A	B
*synopGBS1338	81.79	6D	TGCAGTGTGTATGGGGAAATGTGGAATGGCACCTCACATCGATGCGTGGACCTCGCGGCGCGC	G/C	0	15387	-1	40	2	98	86	9	0.935829	A	B	A	B	B	B	B	B	-	A	A	A	B	B	A	B	B	A	B	B	A	B	A	A	B	B	B	A	A	B	B	B	A	B	A	B
*synopGBS1399	83.3	6D	TGCAGTTCCTGGCTGGGCTGTCACAGGACGGCGGCCTCACGGCGTCGTGGAGGCGGAACAGCA	C/T	0	15818	-1	39	3	62	99	2	0.850267	A	B	A	B	B	B	B	B	-	B	A	A	B	B	A	B	B	A	B	B	A	B	A	A	B	B	B	A	A	B	B	B	A	B	A	B
*synopGBS770	89.34	6D	TGCAGGCACCTCGGGCATGCTGGGGTCGGGCGGGGCAGCAACCAGCGCCTGGCCACCACGGCA	G/A	0	10529	-1	32	2	86	67	2	0.807487	A	B	A	B	B	B	B	B	-	B	A	A	B	B	A	B	B	A	B	B	A	B	A	A	B	B	B	A	A	B	B	B	A	B	A	B
*synopGBS1189	94.29	6D	TGCAGTCGACATCTCCGTCATGCCTTTCCCCGACGTCGGGCTCCCGCCAGGCATGGAGAACCT	A/C	0	14264	-1	63	2	64	90	2	0.812834	A	B	A	B	B	B	B	B	B	B	A	A	B	B	A	B	B	A	B	B	-	B	A	A	B	B	B	A	A	B	B	B	A	A	A	B
*synopGBS264	96.08	6D	TGCAGATCTGTCGCCTCGAAACTACCGTACCTGCTGTCCCTCTTCGGCTCCTACACAAACTCC	G/C	0	2806	-1	32	3	104	64	3	0.882353	A	B	A	B	B	B	B	B	B	B	A	A	B	B	A	B	B	A	B	B	B	B	A	A	B	B	B	A	A	B	B	B	A	A	A	B
*synopGBS11	96.91	6D	TGCAGAAAAGAAAAAGCAAGCCGCATGGAAAGAAGTTGAACTTTAATCAGGAGAAGTGGGATT	A/C	0	58	-1	8	3	92	66	2	0.834225	A	B	A	B	B	B	B	B	B	B	A	A	B	B	A	B	B	A	B	B	B	B	A	A	B	B	B	A	A	B	B	B	A	A	A	B
*synopGBS12	96.91	6D	TGCAGAAAAGAAAAAGCAAGCCGCATGGAAAGAAGTTGAACTTTAATCAGGAGAAGTGGGATT	G/A	0	59	-1	31	3	92	66	2	0.834225	A	B	A	B	B	B	B	B	B	B	A	A	B	B	A	B	B	A	B	B	B	B	A	A	B	B	B	A	A	B	B	B	A	A	A	B
*synopGBS233	99.52	6D	TGCAGATCCGTAGTTCTTCCCGTCGCTGGTCCGTATCTGTTACCACACTCATCGATCTGTAGG	A/G	0	2645	-1	60	3	58	100	1	0.839572	A	B	A	B	B	B	B	B	B	B	A	-	B	B	A	B	B	A	B	B	B	B	A	A	B	B	B	A	A	B	B	B	A	A	A	B
*synopGBS242	99.52	6D	TGCAGATCGAGCCTGATAGATTATATTGCCGCGCCTGCCTCTTCCTCTCACAGACAAACACCA	A/C	0	2695	-1	56	3	95	62	3	0.823529	A	B	A	B	B	B	B	B	B	B	A	-	B	B	A	B	B	A	B	B	B	B	A	A	B	B	B	A	A	B	B	B	A	A	A	B
*synopGBS555	101.29	6D	TGCAGCTAGTCGCTATGCAAGGACGTGTTTGGTTGCATGCATTAAGCCCAACTAGGTCCGCGC	C/T	0	7921	-1	60	1	94	62	1	0.828877	A	B	A	B	B	-	B	B	B	B	A	B	B	B	A	B	B	A	B	B	B	B	A	A	B	B	B	A	A	B	B	B	A	A	A	B
*synopGBS1353	110.97	6D	TGCAGTTACGTCTGATCTCAGTGGGGGGGCCGCTGGGCGGGCTGAGGCTCCCCATCTTGATCA	G/T	0	15519	-1	27	3	106	69	8	0.893048	A	B	A	B	B	A	B	B	B	B	A	B	B	B	A	B	B	A	B	B	B	B	A	A	B	B	B	A	A	B	B	B	A	A	A	B
*synopGBS1440	110.97	6D	TGCAGTTGCGCCTGATCTCGGTGGGGATTCCAGGGGGCGGGCTGAGGTTGGACATCTTGATGA	C/G	0	16087	-1	18	2	66	98	5	0.850267	A	B	A	B	B	A	B	B	B	B	A	B	B	B	A	B	B	A	B	B	B	B	A	A	B	B	B	A	A	B	B	B	A	A	A	B
*synopGBS1441	110.97	6D	TGCAGTTGCGCCTGATCTCGGTGGGGATTCCAGGGGGCGGGCTGAGGTTGGACATCTTGATGA	A/G	0	16088	-1	26	2	66	101	8	0.850267	A	B	A	B	B	A	B	B	B	B	A	B	B	B	A	B	B	A	B	B	B	B	A	A	B	B	B	A	A	B	B	B	A	A	A	B
*synopGBS581	116.74	6D	TGCAGCTCCGCTGCTCACCGAGATCTGCAAAGACGGAGCATCACCGTGCAACGCTACTTCCTC	C/T	0	8218	-1	27	3	59	93	2	0.802139	A	B	A	B	B	A	B	B	B	B	A	B	B	B	A	B	B	A	B	B	B	B	A	B	B	B	B	A	A	B	B	B	A	A	A	B
*synopGBS1145	119.49	6D	TGCAGTCAACATCTGAAGACATCGTGGCCATCAACGATAATGAATCCCTCAAAGAATCTGAAA	A/C	0	13862	-1	43	3	100	68	6	0.86631	A	B	A	B	B	A	B	B	B	B	A	B	B	B	A	A	B	A	B	B	B	B	A	B	B	B	B	A	A	B	B	B	A	A	A	B
*synopGBS513	120.29	6D	TGCAGCGCTTCCCTAAACATCCCAGAGCCGCGGGGCACGCCTACAGCTTCGGCACACGCTGCC	A/G	0	7260	-1	53	2	72	109	8	0.925134	A	B	A	B	B	A	B	B	B	B	A	B	B	B	A	A	B	A	B	B	B	B	A	B	B	B	B	A	A	B	B	B	A	A	A	B
*synopGBS239	133.45	6D	TGCAGATCGACCACGTCGACATCTCGGAGCTGCCGCTGCTCAACACCGACCTCGAGGCCGACG	A/G	0	2685	-1	5	3	113	55	10	0.84492	A	B	A	B	B	A	B	B	B	B	A	B	B	B	A	A	B	A	B	B	B	B	A	B	B	B	B	A	A	A	B	-	A	A	A	B
*synopGBS240	133.45	6D	TGCAGATCGACCACGTCGACATCTCGGAGCTGCCGCTGCTCAACACCGACCTCGAGGCCGACG	C/T	0	2686	-1	11	3	113	55	10	0.84492	A	B	A	B	B	A	B	B	B	B	A	B	B	B	A	A	B	A	B	B	B	B	A	B	B	B	B	A	A	A	B	-	A	A	A	B
*synopGBS667	143.29	6D	TGCAGGAAACCAGCGAGCAACCTTGGCCAATGGTCTGCCCCAAATGAGGTATGATAGCCATGA	C/T	0	9483	-1	10	3	93	70	4	0.850267	A	B	A	B	B	A	B	B	B	B	A	B	B	B	A	A	B	B	B	B	B	A	A	B	B	B	B	A	A	A	B	A	A	A	A	B
*synopGBS160	144.14	6D	TGCAGACGTCAAAGAGGCGCCGCATGTTGGGGCTGTGGACGGAGCCGCCGAAGTTCAGGCTGT	A/G	0	1471	-1	23	3	97	73	5	0.882353	A	B	A	B	B	A	B	B	B	B	A	B	B	B	A	A	B	B	B	B	B	B	A	B	B	B	B	A	A	A	B	A	A	A	A	B
*synopGBS161	144.95	6D	TGCAGACGTCAAAGAGGCGCCGCATGTTGGGGCTGTGGACGGAGCCGCCGAAGTTCAGGCTGT	T/C	0	1472	-1	24	3	97	73	5	0.882353	A	B	A	B	B	A	B	B	B	B	A	B	B	B	A	A	B	B	B	B	B	B	A	B	B	B	B	A	A	A	B	A	A	A	A	B
*synopGBS228	144.95	6D	TGCAGATCCATCATCTCCAAGGAGCAGTACTGCCTGCCCCTCTTCGGCTCCTTGGACAACCTC	A/G	0	2594	-1	12	3	96	77	9	0.877005	A	B	A	B	B	A	B	B	B	B	A	B	B	B	A	A	B	B	B	B	B	B	A	B	B	B	B	A	A	A	B	B	A	A	A	B
*synopGBS675	144.95	6D	TGCAGGAACTCCTGGTACGTGCGCCATGATCTGCATCTCCTCGGGCGGGAACGCGCCCTTCAG	C/A	0	9598	-1	11	3	72	96	1	0.893048	A	B	A	B	B	A	B	B	B	B	A	B	B	B	A	A	B	B	B	B	B	B	A	B	B	B	B	A	A	A	B	-	A	A	A	B
*synopGBS777	144.95	6D	TGCAGGCACTCATGGTACGTGCGCCATGATCTGCATCTCCTCGGGCGGGAACGCGCCCTTCAG	A/C	0	10558	-1	11	1	96	72	1	0.893048	A	B	A	B	B	A	B	B	B	B	A	B	B	B	A	A	B	B	B	B	B	B	A	B	B	B	B	A	A	A	B	-	A	A	A	B
*synopGBS1421	145.86	6D	TGCAGTTGATGACGACGATGCTGACTGCATCAGGGGGGATGCCTGCCTTGGCGAACAGGCCGT	C/T	0	16006	-1	59	3	77	93	14	0.834225	A	B	A	B	B	A	B	-	B	B	A	B	B	B	A	A	B	B	B	B	B	A	A	B	B	B	B	A	A	A	B	A	A	A	A	B
*synopGBS1028	156.58	6D	TGCAGGTTTACCTTCATGAGCGGAGCCAATTCTGCGTAGTTGGCGCGCATCAGCATGGGGTAG	A/C	0	13042	-1	27	2	103	73	9	0.893048	A	B	A	A	B	A	B	-	B	A	B	B	B	B	A	B	B	B	B	B	B	A	A	B	B	B	B	A	A	A	B	A	A	A	A	B
*synopGBS453	156.58	6D	TGCAGCCCTGGCTCGATGGCTCCGCCTCGCGATTGAGGGATCCACCTCACGACATCCAGCTCG	A/C	0	5951	-1	31	3	85	75	6	0.823529	A	B	A	A	B	A	B	-	B	A	B	B	B	B	A	B	B	B	B	B	B	A	A	B	B	B	B	A	A	A	B	A	A	A	A	B
*synopGBS601	156.58	6D	TGCAGCTCTATCTGCACCCACAACATCAACGCCCAAGCGTCACCCTGGCTTGATTGCACCACC	C/G	0	8470	-1	11	2	90	80	5	0.882353	A	B	A	A	B	A	B	A	B	A	B	B	B	B	A	B	B	B	B	B	B	A	A	B	B	B	B	A	A	A	B	A	A	A	A	B
*synopGBS602	156.58	6D	TGCAGCTCTATCTGCACCCACAACATCAACGCCCAAGCGTCACCCTGGCTTGATTGCACCACC	A/G	0	8471	-1	41	2	90	80	5	0.882353	A	B	A	A	B	A	B	A	B	A	B	B	B	B	A	B	B	B	B	B	B	A	A	B	B	B	B	A	A	A	B	A	A	A	A	B
*synopGBS874	156.58	6D	TGCAGGGACGATTGCGACGAGAAGCCGCGAGCCGCCACGCCCACCACACTTCTTCTTCACAGT	A/G	0	11529	-1	16	3	66	101	7	0.855615	A	B	A	A	B	-	B	A	B	A	B	B	B	B	A	B	B	B	B	B	B	A	A	B	B	B	B	A	A	A	B	A	A	A	A	B
*synopGBS875	156.58	6D	TGCAGGGACGATTGCGACGAGAAGCCGCGAGCCGCCACGCCCACCACACTTCTTCTTCACAGT	T/G	0	11530	-1	49	2	66	101	7	0.855615	A	B	A	A	B	-	B	A	B	A	B	B	B	B	A	B	B	B	B	B	B	A	A	B	B	B	B	A	A	A	B	A	A	A	A	B
*synopGBS623	158.38	6D	TGCAGCTTACAAATGACACGGATGACCACATGGCATTTAAACTTAGTACTACAGAGATTGTGG	A/C	0	9028	-1	39	3	73	97	8	0.86631	A	B	A	A	B	-	B	A	B	A	B	B	B	B	A	B	B	B	B	B	B	A	A	B	B	B	B	A	A	A	B	A	A	A	A	B
*synopGBS577	159.19	6D	TGCAGCTCATTTCCACAGAGCGGCTAAAACCGAGCTCCACAGCTTCGTGGAGCCAGAAATATT	C/T	0	8129	-1	12	3	82	95	10	0.893048	A	B	A	-	B	-	B	A	B	A	B	B	B	B	A	B	A	B	B	B	B	A	A	B	B	B	B	A	A	A	B	A	A	A	A	B
*synopGBS718	160.94	6D	TGCAGGAGAGGGCCCACAAAGGGTCAAGGCCCATACAAGGCTGAGCTGGTTGGGACTCGCCTC	A/T	0	10017	-1	8	3	78	79	5	0.812834	A	B	A	-	B	-	B	A	B	A	B	B	B	B	A	B	A	B	B	B	B	A	A	B	B	B	B	A	A	A	B	-	A	A	-	B
*synopGBS719	160.94	6D	TGCAGGAGAGGGCCCACAAAGGGTCAAGGCCCATACAAGGCTGAGCTGGTTGGGACTCGCCTC	G/C	0	10018	-1	22	3	78	79	5	0.812834	A	B	A	-	B	-	B	A	B	A	B	B	B	B	A	B	A	B	B	B	B	A	A	B	B	B	B	A	A	A	B	-	A	A	-	B
*synopGBS1059	1.06	7A	TGCAGTAATGGATCGCAGAAAGCCAGACAAACTAGTATCGACTTTGAGCGAGGCGAGCCTAGC	A/T	0	13250	-1	24	3	96	75	7	0.877005	A	B	A	A	B	B	-	A	B	A	B	-	B	A	A	B	A	B	-	B	B	A	A	B	B	B	A	B	B	A	A	B	B	B	B	A
*synopGBS1131	1.06	7A	TGCAGTATCAAACACATCAAACTGGGCATTCACTTCGTTCGTGAGAAGGTCGCTCTTTGTTAG	C/T	0	13718	-1	39	3	87	70	4	0.818182	A	B	A	A	B	B	B	A	B	A	B	B	B	A	A	B	A	B	B	B	B	A	A	B	B	B	A	B	B	A	A	B	B	B	B	A
*synopGBS392	1.06	7A	TGCAGCATGGCGTTGCTCCACAGGAACCCATCGGCCTCGTCGCCGATTTCCCCTACCGTCTTC	C/T	0	5007	-1	15	3	86	66	2	0.802139	A	B	A	A	B	B	B	A	B	A	B	B	B	A	A	B	A	B	B	B	B	A	A	B	B	B	A	B	B	A	A	B	B	B	B	A
*synopGBS948	1.06	7A	TGCAGGTATGTGGAGGGGGACGAAAGCAATGGCGTGCACCTTTTCTACTACTTCGTCGAGTCG	C/T	0	12295	-1	32	3	71	91	5	0.839572	A	B	A	A	B	B	B	A	B	A	B	B	B	A	A	B	A	B	B	B	B	A	A	B	B	B	A	B	-	A	A	B	B	B	B	A
*synopGBS949	1.06	7A	TGCAGGTATGTGGAGGGGGACGAAAGCAATGGCGTGCACCTTTTCTACTACTTCGTCGAGTCG	T/C	0	12296	-1	34	3	71	91	5	0.839572	A	B	A	A	B	B	B	A	B	A	B	B	B	A	A	B	A	B	B	B	B	A	A	B	B	B	A	B	-	A	A	B	B	B	B	A
*synopGBS950	1.06	7A	TGCAGGTATGTGGAGGTGGACGAAAGCAATGGTGCGCACCTTTTCTACTACTTCGTCGAGTCG	T/C	0	12297	-1	32	2	91	69	4	0.834225	A	B	A	A	B	B	B	A	B	A	B	B	B	A	A	B	A	B	B	B	B	A	A	B	B	B	A	B	-	A	A	B	B	B	B	A
*synopGBS951	1.06	7A	TGCAGGTATGTGGAGGTGGACGAAAGCAATGGTGCGCACCTTTTCTACTACTTCGTCGAGTCG	C/T	0	12298	-1	34	2	91	69	4	0.834225	A	B	A	A	B	B	B	A	B	A	B	B	B	A	A	B	A	B	B	B	B	A	A	B	B	B	A	B	-	A	A	B	B	B	B	A
*synopGBS1394	1.86	7A	TGCAGTTCCATCACTGCATCTTCAAAATGCATGGATTACCAAGTTCTTTAACCCACTTAGGAA	A/G	0	15765	-1	34	3	81	95	11	0.882353	A	B	A	A	B	B	B	A	B	A	B	B	B	A	A	B	A	B	B	B	B	A	A	B	B	B	A	B	A	A	A	B	B	B	B	A
*synopGBS271	1.86	7A	TGCAGATGAATTGTATTGATACTCTCAGATGGTTGCCTACCCTCACTGGTCGTCTGTCGCTGT	A/G	0	2850	-1	14	3	88	76	3	0.860963	A	B	A	A	B	B	B	A	B	A	B	B	B	A	A	B	A	B	B	B	B	A	A	B	B	B	A	B	A	A	A	B	B	B	B	A
*synopGBS272	1.86	7A	TGCAGATGAATTGTATTGATACTCTCAGATGGTTGCCTACCCTCACTGGTCGTCTGTCGCTGT	C/T	0	2851	-1	39	3	88	76	3	0.860963	A	B	A	A	B	B	B	A	B	A	B	B	B	A	A	B	A	B	B	B	B	A	A	B	B	B	A	B	A	A	A	B	B	B	B	A
*synopGBS348	3.52	7A	TGCAGCACAATCTTCAGGTGGAAACAAGGGCAAAGTTCGGCTGGTGAATGCCGAGATCAGGGG	T/C	0	3903	-1	44	3	83	77	3	0.839572	A	B	A	A	B	B	B	A	B	A	B	B	B	A	A	B	A	B	B	B	B	A	A	B	B	B	A	B	A	A	A	B	B	B	B	A
*synopGBS349	3.52	7A	TGCAGCACAATCTTCAGGTGGAAACAAGGGCAAAGTTCGGCTGTCGAATGCCGAGATCAGGAG	C/T	0	3904	-1	44	2	77	83	3	0.839572	A	B	A	A	B	B	B	A	B	A	B	B	B	A	A	B	A	B	B	B	B	A	A	B	B	B	A	B	A	A	A	B	B	B	B	A
*synopGBS350	3.52	7A	TGCAGCACAATCTTCAGGTGGAAACAAGGGCAAAGTTCGGCTGTCGAATGCCGAGATCAGGAG	A/G	0	3905	-1	61	2	77	89	9	0.839572	A	B	A	A	B	B	B	A	B	A	B	B	B	A	A	B	A	B	B	B	B	A	A	B	B	B	A	B	A	A	A	B	B	B	B	A
*synopGBS954	4.33	7A	TGCAGGTCACAGGGAGAGTGTCGGCATGGAGGAAGAAGGGATGCAGTCGGCGGCGAACCCACA	A/G	0	12315	-1	29	3	94	81	5	0.909091	A	B	A	A	B	B	B	A	B	A	B	B	B	A	A	B	A	B	B	B	B	A	A	B	B	B	A	B	A	A	A	B	B	B	B	A
*synopGBS1293	5.09	7A	TGCAGTGCGCAAGGCTAGCGTCCAAGTCGACGCACATGGGGGTGTGCGGTACAACGTAGGAGA	C/G	0	14945	-1	14	3	73	93	4	0.86631	A	B	A	A	B	B	B	A	B	A	B	B	B	A	A	B	A	B	B	B	B	A	A	B	B	B	A	B	A	A	A	B	B	B	B	A
*synopGBS1294	5.09	7A	TGCAGTGCGCAAGGCTAGCGTCCAAGTCGACGCACATGGGGGTGTGCGGTACAACGTAGGAGA	C/T	0	14946	-1	63	3	83	89	10	0.86631	A	B	A	A	B	B	B	A	B	A	B	B	B	A	A	B	A	B	B	B	B	A	A	B	B	B	A	B	A	A	A	B	B	B	B	A
*synopGBS1302	5.9	7A	TGCAGTGCTATTTCGCCAAGGAGGTGTGGTGTCAACTACAGAGAACGCATAGAACAATGTGCG	A/G	0	15006	-1	9	3	90	78	5	0.871658	A	B	A	A	B	B	B	A	B	A	B	B	B	A	A	B	A	B	B	B	B	A	A	B	B	B	A	B	A	A	A	B	B	B	B	A
*synopGBS1474	6.71	7A	TGCAGTTTCTTTATGTGGGTTTGCGGCTGCCTCTTAATCCCACATAATTTACGTGGGCAGCCC	C/T	0	16443	-1	51	3	87	69	1	0.828877	A	B	A	A	B	B	B	A	B	A	B	B	B	A	A	B	A	B	B	B	B	A	A	B	B	B	A	B	A	A	A	B	B	B	B	A
*synopGBS958	7.59	7A	TGCAGGTCCAGCCGACCCCCCTCCTAATCCCTCTCTAAGGCCCTGGCCTTGTGCTTCTCCACT	G/T	0	12374	-1	50	2	68	95	9	0.823529	A	B	A	A	B	B	B	A	B	A	B	B	B	A	A	B	A	B	B	B	B	A	A	B	B	B	A	B	A	A	A	B	B	B	B	A
*synopGBS224	12.4	7A	TGCAGATCAGCAAAGACGACATTCTTCCTGAGCCACCACATCCAGTATGTTGTATCATCAGTG	A/G	0	2524	-1	15	3	79	79	5	0.818182	A	B	A	A	B	B	B	A	B	A	B	B	B	A	A	B	A	B	B	B	B	A	A	B	B	B	-	B	A	A	A	B	B	-	B	A
*synopGBS323	22.82	7A	TGCAGATTGGACGGATGCTCCATGCACCAGAAGCTCCTCTTCTTTCTCTCTTCAGGGAGCGGC	C/T	0	3311	-1	11	3	78	82	3	0.839572	A	B	A	A	B	B	B	A	B	A	B	A	B	A	A	B	A	B	B	B	B	A	A	B	B	B	B	B	A	A	A	-	B	-	A	A
*synopGBS131	30.87	7A	TGCAGACCGAGCCAGCTATTTTGTCGCGAACGGAAAGCAGCATTTCGAGAGAGTAAGCGCCGC	C/G	0	1254	-1	30	3	69	87	4	0.812834	A	B	A	A	B	B	B	A	B	A	B	A	B	A	B	B	A	B	A	B	B	A	A	B	B	B	B	B	A	A	B	-	B	A	A	A
*synopGBS511	30.87	7A	TGCAGCGCTAAATAGGAAATGGCGTCAAAATGACCCAGCTTCGCTGAAGCTCATCTTCCCGTC	C/T	0	7205	-1	41	3	85	82	5	0.86631	A	B	A	A	B	B	B	A	B	A	B	A	B	A	B	B	A	B	A	B	B	A	A	B	B	B	B	B	A	A	B	A	-	A	A	A
*synopGBS818	35.46	7A	TGCAGGCCTCTGACTACTCTCCTTCCGTTGGGACGCTGGTCGGGCTGTTTGTTCCATTCTGCC	A/G	0	10950	-1	15	3	84	69	2	0.807487	A	B	A	A	B	B	B	A	B	A	B	A	B	A	B	B	A	B	A	B	B	A	A	B	B	B	B	B	A	B	B	A	A	A	A	A
*synopGBS819	35.46	7A	TGCAGGCCTCTGACTACTCTCCTTCCGTTGGGACGCTGGTCGGGCTGTTTGTTCCATTCTGCC	G/A	0	10951	-1	29	3	84	69	2	0.807487	A	B	A	A	B	B	B	A	B	A	B	A	B	A	B	B	A	B	A	B	B	A	A	B	B	B	B	B	A	B	B	A	A	A	A	A
*synopGBS1119	50.33	7A	TGCAGTAGGGCATCTAGCGCGTTGCGTGAAGCCTCCGCAGTAGCGTATGCGTGTCAAGGGTTG	A/G	0	13618	-1	46	3	73	101	5	0.903743	A	B	A	A	A	B	B	-	B	B	B	A	B	A	B	B	A	B	A	B	B	A	A	B	B	B	B	B	A	B	B	A	A	A	A	A
*synopGBS300	54.72	7A	TGCAGATGTGGACAAAATGCACCTTGGGAAAGTCTGAGGGTGCCGTCGGCGATGAGACCACTG	T/C	0	3114	-1	61	3	91	63	4	0.802139	A	B	B	A	A	B	B	B	B	B	B	A	B	A	B	B	A	B	A	B	B	A	A	B	B	B	B	B	A	B	B	A	A	A	A	A
*synopGBS366	56.55	7A	TGCAGCAGAATACTGCGGCAACACTACATCGTACTACAGTGAAACGGTGCAGCACACCTCTAC	T/C	0	4278	-1	28	3	69	109	3	0.935829	A	B	B	A	A	B	B	B	B	B	B	A	B	A	B	B	A	B	A	B	B	A	A	B	B	B	B	B	A	B	B	A	A	A	A	A
*synopGBS66	56.55	7A	TGCAGAATCACAGTCTGGGCTTCTTTGAATTTGGGATTTGACGGCCATGACTCGATCTGTCGC	A/G	0	755	-1	9	2	66	106	13	0.850267	A	B	B	-	A	B	B	B	B	B	B	A	B	A	B	B	A	B	A	B	B	A	A	B	B	B	B	B	A	B	B	A	A	A	A	A
*synopGBS67	56.55	7A	TGCAGAATCACAGTCTGGGCTTCTTTGAATTTGGGATTTGACGGCCATGACTCGATCTGTCGC	A/G	0	756	-1	11	2	66	106	13	0.850267	A	B	B	-	A	B	B	B	B	B	B	A	B	A	B	B	A	B	A	B	B	A	A	B	B	B	B	B	A	B	B	A	A	A	A	A
*synopGBS647	68.49	7A	TGCAGCTTGCAACCAGAACAGCCGCTCTGTGCTGCTCGCCAACAACCAGTCTGTGGCGGCCTG	A/G	0	9263	-1	10	3	87	72	2	0.839572	A	B	B	-	A	B	-	B	B	B	B	A	B	A	B	A	A	B	A	B	B	A	A	B	B	A	B	B	A	B	B	A	A	A	A	A
*synopGBS249	79.9	7A	TGCAGATCGATTCATGACGGCGCCTGGCGGCGCCTGGGCGATTAGGGCTTTGACCATGGAACC	C/T	0	2709	-1	17	3	76	99	4	0.914439	A	B	B	-	A	B	-	B	B	B	B	A	-	A	A	A	A	B	A	B	B	A	A	B	B	A	B	B	A	B	B	A	A	A	B	A
*synopGBS1185	85.51	7A	TGCAGTCCTGGTTCCCATCTTTAATCTGCATGCATTGCCGCTGATGGCCGTTCTGTTGGGCGA	G/C	0	14234	-1	61	2	78	103	6	0.935829	A	B	B	B	A	B	A	B	A	B	B	A	A	A	A	A	A	B	A	B	B	A	A	B	B	A	B	B	A	B	B	A	A	A	B	A
*synopGBS1264	85.51	7A	TGCAGTGCAAGATTCGATTTCGGGAGGGCGCTGCTTTGCTAGCCTAGATAGATGAATCTCGTC	C/T	0	14780	-1	20	2	94	66	5	0.828877	A	B	B	B	A	B	A	B	A	B	B	A	A	A	A	A	A	B	A	B	B	A	A	B	B	A	B	B	A	B	B	A	A	A	B	A
*synopGBS1265	85.51	7A	TGCAGTGCAAGATTCGATTTCGGGAGGGCGCTGCTTTGCTAGCCTAGATAGATGAATCTCGTC	G/T	0	14781	-1	32	2	94	66	5	0.828877	A	B	B	B	A	B	A	B	A	B	B	A	A	A	A	A	A	B	A	B	B	A	A	B	B	A	B	B	A	B	B	A	A	A	B	A
*synopGBS182	85.51	7A	TGCAGAGAGAGTCAGAGAGAGAGAGGCAGAGGGCGGGACCCACATGAGGCGAGGGGAGCTCGG	A/G	0	1753	-1	19	3	89	72	5	0.834225	A	B	B	B	A	B	A	B	A	B	B	A	A	A	A	A	A	B	A	B	B	A	A	B	B	A	B	B	A	B	B	A	A	A	B	A
*synopGBS784	85.51	7A	TGCAGGCAGCAGGCTCCCTACAGGGCATTGCTGCGTGCGCACGCTCTTGTTAGTTTCTTCTGC	A/C	0	10608	-1	26	3	100	75	10	0.882353	A	B	B	B	A	B	A	B	A	B	B	A	A	A	A	A	A	B	A	B	B	A	A	B	B	A	B	B	A	B	B	A	A	A	B	A
*synopGBS114	88.07	7A	TGCAGACATGGACGATGCACCTTGTGGATGTCAGAGGGGGTCGTCGGCGACGAGTCCGCTGGT	T/C	0	1126	-1	24	3	76	85	2	0.850267	A	B	B	B	A	B	A	B	A	B	B	A	A	A	A	A	B	B	A	B	B	A	A	B	A	A	B	B	A	B	B	A	A	A	B	A
*synopGBS430	88.07	7A	TGCAGCCAGTGTCCATGAATCACAGCTCTGCTGGGCCTGGAGCCCTGGACCTTGATCAACATA	A/C	0	5491	-1	7	3	86	71	4	0.818182	A	B	B	B	A	B	A	B	A	B	B	A	A	A	A	A	B	B	A	B	B	A	A	B	A	A	B	B	A	B	B	A	A	A	B	A
*synopGBS431	88.07	7A	TGCAGCCAGTGTCCATGAATCACAGCTCTGCTGGGCCTGGAGCCCTGGACCTTGATCAACATA	G/T	0	5492	-1	8	3	86	71	4	0.818182	A	B	B	B	A	B	A	B	A	B	B	A	A	A	A	A	B	B	A	B	B	A	A	B	A	A	B	B	A	B	B	A	A	A	B	A
*synopGBS432	88.07	7A	TGCAGCCAGTGTCCATGAATCACAGCTCTGCTGGGCCTGGAGCCCTGGACCTTGATCAACATA	T/C	0	5493	-1	52	3	86	71	4	0.818182	A	B	B	B	A	B	A	B	A	B	B	A	A	A	A	A	B	B	A	B	B	A	A	B	A	A	B	B	A	B	B	A	A	A	B	A
*synopGBS649	88.07	7A	TGCAGCTTGGTTGTTGTGGTCTACCGTGGATGTCGCTCGCACTGAATGTCGGTCTGTCTTGAC	C/T	0	9337	-1	23	3	72	93	4	0.860963	A	B	B	B	A	B	A	B	A	B	B	A	A	A	A	A	B	B	A	B	B	A	A	B	A	A	B	B	A	B	B	A	A	A	B	A
*synopGBS1170	90.73	7A	TGCAGTCCAAATGTCGTATCCTAAACCTACAACGGCTACCAGGAGTCTACTGACCACACGCGC	C/G	0	14041	-1	35	3	74	95	3	0.887701	A	B	B	B	A	B	A	B	A	B	B	A	A	A	A	A	B	B	A	B	B	A	A	B	A	A	B	B	A	B	B	A	A	A	B	A
*synopGBS41	90.73	7A	TGCAGAACCCTGTTCTCTTACTCAGTCCTTCATACGGCGCCTTGTCCCTGCTGTTTGTAGGCC	C/T	0	430	-1	9	2	89	68	4	0.818182	A	B	B	B	A	B	A	B	A	B	B	A	A	A	A	A	B	B	A	B	B	A	A	B	A	A	B	B	A	B	B	A	A	A	B	A
*synopGBS682	90.73	7A	TGCAGGAAGATGGACACAGAATACGATTCTGGCTTGTGAGGCGGGATGTCAAGTGACGCACGT	A/C	0	9629	-1	38	3	86	66	1	0.807487	A	B	B	B	A	B	A	B	A	B	B	A	A	A	A	A	B	B	A	B	B	A	A	B	A	A	B	B	A	B	B	A	A	A	B	A
*synopGBS1377	91.61	7A	TGCAGTTCAAGCTCCTCGCTGTCACTCCGATGATGGCCGACATGTGCCTGCTCTTCGCCATGC	A/G	0	15664	-1	8	3	103	84	10	0.946524	A	B	B	B	A	B	A	B	A	B	B	A	A	A	A	A	B	B	A	B	B	A	A	B	A	A	B	B	A	B	B	A	A	A	B	A
*synopGBS1385	91.61	7A	TGCAGTTCATCGCCAGATTCCGACGCCAGTGAGCCCTCCCGAGCCTCCTTCTTCTGGGATCCG	C/T	0	15713	-1	61	3	86	67	3	0.802139	A	B	B	B	A	B	A	B	A	B	B	A	A	A	A	A	B	B	A	B	B	A	A	B	A	A	B	B	A	B	B	A	A	A	B	A
*synopGBS1386	91.61	7A	TGCAGTTCATCGCCAGATTCCGACGCCAGTGAGCCCTCCCGAGCCTCCTTCTTCTGGGATCCG	G/A	0	15714	-1	62	3	86	67	3	0.802139	A	B	B	B	A	B	A	B	A	B	B	A	A	A	A	A	B	B	A	B	B	A	A	B	A	A	B	B	A	B	B	A	A	A	B	A
*synopGBS154	91.61	7A	TGCAGACGCGGGCTGACCAGGCAACGGTTTGACTGAAGCAGGGCGGGCGGCGGGCCATCTCCC	C/T	0	1422	-1	6	3	81	80	3	0.84492	A	B	B	B	A	B	A	B	A	B	B	A	A	A	A	A	B	B	A	B	B	A	A	B	A	A	B	B	A	B	B	A	A	A	B	A
*synopGBS449	91.61	7A	TGCAGCCCGTTCTTCCAATTGAGTGGGCGCGTGCAGCGGCGTCCCCTGCACTCGCTCACGTCG	C/T	0	5884	-1	29	3	95	82	5	0.919786	A	B	B	B	A	B	A	B	A	B	B	A	A	A	A	A	B	B	A	B	B	A	A	B	A	A	B	B	A	B	B	A	A	A	B	A
*synopGBS867	91.61	7A	TGCAGGGAACTGAGAGAGTAGTCTGCGAGGGACTTGCATGCATGGCGCCCCTTCTTCCTCCCT	G/A	0	11480	-1	30	3	98	76	6	0.898396	A	B	B	B	A	B	A	B	A	B	B	A	A	A	A	A	B	B	A	B	B	A	A	B	A	A	B	B	A	B	B	A	A	A	B	A
*synopGBS918	91.61	7A	TGCAGGTAACTGAGAGAGTAGTCTGCGAGGAACTTGCATGCATGGCGCCCCTTCTTCCTCCCT	A/G	0	12116	-1	30	1	76	97	5	0.898396	A	B	B	B	A	B	A	B	A	B	B	A	A	A	A	A	B	B	A	B	B	A	A	B	A	A	B	B	A	B	B	A	A	A	B	A
*synopGBS33	92.39	7A	TGCAGAACACTCATCTCTGTCATAGGAACAGTGCGAAAATCCATAATGGAGTAGTAAGTCGCA	A/G	0	362	-1	45	3	93	72	4	0.860963	A	B	B	B	A	B	A	B	A	B	B	A	A	A	A	A	B	B	A	B	B	A	A	B	A	A	B	B	A	B	B	A	A	A	B	A
*synopGBS679	93.26	7A	TGCAGGAAGAACACGCGACGCAGCGTGAGATCCAGCGAGGAGAGGAGAGGAGACGAGACGGAT	C/G	0	9609	-1	63	1	82	73	2	0.818182	A	B	B	B	A	B	A	B	A	B	B	A	A	A	A	A	B	B	A	B	B	A	A	B	A	A	B	B	A	B	B	A	A	A	B	A
*synopGBS1052	98.92	7A	TGCAGTAAGCCATGCAAGATCTAGCCTGCGGACACAAGGGCGAGGAACGCAGGGAGCAGCAGT	C/T	0	13197	-1	59	3	67	97	3	0.860963	A	B	B	B	A	B	A	B	A	B	B	A	A	A	A	A	B	B	A	B	B	A	A	B	A	B	B	B	A	B	B	A	A	B	B	A
*synopGBS1053	98.92	7A	TGCAGTAAGCCATGCAAGATCTAGCCTGCGGACACAAGGGCGAGGAACGCAGGGAGCAGCAGT	T/G	0	13198	-1	62	3	67	97	3	0.860963	A	B	B	B	A	B	A	B	A	B	B	A	A	A	A	A	B	B	A	B	B	A	A	B	A	B	B	B	A	B	B	A	A	B	B	A
*synopGBS1054	98.92	7A	TGCAGTAAGCCATGCAAGATCTAGCCTGCGGACACAAGGGCGAGGAACGCAGGGAGCAGCAGT	A/G	0	13199	-1	63	3	67	97	3	0.860963	A	B	B	B	A	B	A	B	A	B	B	A	A	A	A	A	B	B	A	B	B	A	A	B	A	B	B	B	A	B	B	A	A	B	B	A
*synopGBS369	98.92	7A	TGCAGCAGATTGTCGACGTACCGCACACCGATATCGATAAAAAGGGCCAGCCCATCTGTCCGT	G/A	0	4376	-1	43	3	97	62	4	0.828877	A	B	B	B	A	B	A	B	A	B	B	A	A	A	A	A	B	B	A	B	B	A	A	B	A	B	B	B	A	B	B	A	A	B	B	A
*synopGBS370	98.92	7A	TGCAGCAGATTGTCGACGTACCGCACACCGATATCGATCAAAAAGGCCAGCCCATCTGTCCGT	A/G	0	4377	-1	43	1	62	94	4	0.812834	A	B	B	B	A	B	A	B	A	B	B	A	A	A	A	A	B	B	A	B	B	A	A	B	A	B	B	B	A	B	B	A	A	B	B	A
*synopGBS1447	100.44	7A	TGCAGTTGGTCTTGATGTGATGGGGGTCATCGGAGGCACACAGAACGGGCAGCGGCCACTGCC	G/C	0	16183	-1	35	3	104	81	6	0.957219	A	B	B	B	A	B	A	B	A	B	B	A	A	A	A	A	B	B	A	B	B	A	A	B	A	B	B	B	A	B	B	A	A	B	B	A
*synopGBS1448	100.44	7A	TGCAGTTGGTCTTGATGTGATGGGGTTCATCGGAGCCACACAGAACGGGCAGCGGCCACTGCC	C/G	0	16184	-1	35	1	81	103	6	0.951872	A	B	B	B	A	B	A	B	A	B	B	A	A	A	A	A	B	B	A	B	B	A	A	B	A	B	B	B	A	B	B	A	A	B	B	A
*synopGBS1138	101.16	7A	TGCAGTATGGGCAATCTCCAACATAGTGGTGGAATCGGATTGCCAAACCCTCCTGCACGCAGG	C/G	0	13782	-1	11	3	93	80	7	0.887701	A	B	B	B	A	B	A	B	A	B	B	A	A	A	A	A	B	B	A	B	B	A	A	B	A	B	B	B	A	B	B	A	A	B	B	A
*synopGBS446	101.16	7A	TGCAGCCCCTTTACGTCATATACACTAGATAATCAAAAGGCGGGCACATACATATGGTCGGAG	A/G	0	5810	-1	31	3	92	71	5	0.84492	A	B	B	B	A	B	A	B	A	B	B	A	A	A	A	A	B	B	A	B	B	A	A	B	A	B	B	B	A	B	B	A	A	B	B	A
*synopGBS452	101.16	7A	TGCAGCCCTGAGATGCCCTTCTCCCTCCCCGTGAGCCTCCTGGCAGCAGGAACGAATGCCCGA	A/C	0	5940	-1	44	3	97	75	4	0.898396	A	B	B	B	A	B	A	B	A	B	B	A	A	A	A	A	B	B	A	B	B	A	A	B	A	B	B	B	A	B	B	A	A	B	B	A
*synopGBS865	101.16	7A	TGCAGGGAAAAGGACATGATATGTGGGCAGAATTTGGCCGTATCTGGCGCCTTCTCCAGTTCT	C/T	0	11458	-1	27	3	91	70	6	0.828877	A	B	B	B	A	B	A	B	A	B	B	A	A	A	A	A	B	B	A	B	B	A	A	B	A	B	B	B	A	B	B	A	A	B	B	A
*synopGBS1306	101.99	7A	TGCAGTGCTTGCGTAGTTGCGTGCATGACAAACCGTATACCAACCTATCACGAGAACGACGTA	A/G	0	15048	-1	41	3	72	94	3	0.871658	A	B	B	B	A	B	A	B	A	B	B	A	A	A	A	A	B	B	A	B	B	A	A	B	A	B	B	B	A	B	B	A	A	B	B	A
*synopGBS1307	101.99	7A	TGCAGTGCTTGCGTAGTTGCGTGCATGACAAACCGTATACCAACCTATCACGAGAACGACGTA	C/T	0	15049	-1	44	3	72	94	3	0.871658	A	B	B	B	A	B	A	B	A	B	B	A	A	A	A	A	B	B	A	B	B	A	A	B	A	B	B	B	A	B	B	A	A	B	B	A
*synopGBS722	101.99	7A	TGCAGGAGCTTTTCCTTCACGCGTTCATAACCCCTTGCTACTGTTCCACGTGGTCGCCGCCAC	C/T	0	10124	-1	19	1	77	92	5	0.877005	A	B	B	B	A	B	A	B	A	B	B	A	A	A	A	A	B	B	A	B	B	A	A	B	A	B	B	B	A	B	B	A	A	B	B	A
*synopGBS177	101.99	7A	TGCAGAGACAACTCAAACAGCGAATCCATGGTTGGCTGCTCCAAACCTGCGCAACCCCCAAAT	C/T	0	1701	-1	8	3	66	88	4	0.802139	A	B	B	B	A	B	A	B	A	B	B	A	A	A	A	A	B	B	A	B	B	A	A	B	A	B	A	B	A	B	B	A	A	B	B	A
*synopGBS571	102.93	7A	TGCAGCTCAATCCCAAGTCCGAGTGGCGGGCTCTTGGATCATCACTGTGCGGTGGTTGTAGTT	C/T	0	8049	-1	7	3	78	82	5	0.828877	A	B	B	B	A	B	A	B	A	B	B	A	A	A	A	A	B	B	A	B	B	A	A	B	A	B	B	B	A	B	B	A	A	B	B	A
*synopGBS89	102.93	7A	TGCAGAATTTCTCTTTCAGAAAGGATGGGGAACTGAGCCTGGATTCCTCCCGTCACTGTCAAC	A/G	0	940	-1	61	3	70	94	8	0.834225	A	B	B	B	A	B	A	B	A	B	B	A	A	A	A	A	B	B	A	B	B	A	A	B	A	B	B	B	A	B	B	A	A	B	B	A
*synopGBS1300	111.5	7A	TGCAGTGCTAAGAACCCGTCCGTCGTCAATCCGCTACGTGAGCATGTGAGCGGCGAACTCCGA	C/T	0	14991	-1	16	3	103	78	7	0.930481	A	B	B	B	A	B	A	B	A	B	A	B	A	A	A	A	B	B	A	B	B	A	A	B	A	B	A	B	A	B	B	A	A	B	B	A
*synopGBS1088	115.74	7A	TGCAGTAGAAAATGCGGCGGAATCCCCGTCCTACCCTCCCCAAACTCCCTATGTACAACGTCC	A/G	0	13469	-1	57	3	82	86	6	0.86631	A	B	B	B	A	B	A	B	A	B	A	B	A	A	A	A	B	B	A	B	B	A	A	B	A	B	A	B	A	B	B	A	A	B	A	A
*synopGBS1483	115.74	7A	TGCAGTTTTAGTTACGAAAGTAGGAGCTCAAACTATGAAGCTCACAACTTAGCGAAGCATGCT	C/T	0	16543	-1	14	3	79	86	2	0.871658	A	B	B	B	A	B	A	B	A	B	A	B	A	A	A	A	B	B	A	B	B	A	A	B	A	B	A	B	A	B	B	A	A	B	A	A
*synopGBS748	115.74	7A	TGCAGGATGTACGTACAGTACTTGTTAGCGAGTCAACCACACTACCGTACCAATGGGCGAGAC	A/G	0	10362	-1	61	3	85	70	4	0.807487	A	B	B	B	A	B	A	B	A	B	A	B	A	A	A	A	B	B	A	B	B	A	A	B	A	B	A	B	A	B	B	A	A	B	A	A
*synopGBS1453	119.88	7A	TGCAGTTGGTTCGTCTAGCCTCATCGTTGGTGTTCATCGGCACGTTCAAAGGGGAAGAAGACA	C/T	0	16195	-1	18	3	89	71	3	0.839572	A	B	B	B	A	B	A	B	A	B	A	B	A	A	A	A	B	B	A	B	B	B	A	B	A	B	A	B	A	B	B	A	A	B	A	A
*synopGBS1454	119.88	7A	TGCAGTTGGTTCGTCTAGCCTCATCGTTGGTGTTCATCGGCACGTTCAAAGGGGAAGAAGACA	T/C	0	16196	-1	20	3	89	71	3	0.839572	A	B	B	B	A	B	A	B	A	B	A	B	A	A	A	A	B	B	A	B	B	B	A	B	A	B	A	B	A	B	B	A	A	B	A	A
*synopGBS3	127.44	7A	TGCAGAAAAAATCAGTTTGCATTTACAACACATGAACACCAAGTCTGACATAGGTAGACCATC	C/T	0	14	-1	58	3	69	85	3	0.807487	A	B	B	B	A	B	A	B	A	A	A	B	A	A	A	A	B	B	A	B	B	B	A	B	A	B	A	B	A	B	B	A	A	B	A	A
*synopGBS1140	129.32	7A	TGCAGTATTAACCGTGCCTGGTACAGTACGACGCACAGGGGCACGATTAATAAACGGGGCGGT	C/T	0	13796	-1	11	2	79	77	6	0.802139	A	B	B	B	A	B	A	B	A	A	A	B	A	A	A	A	B	B	A	-	B	B	A	B	A	B	A	B	A	B	B	A	A	B	A	A
*synopGBS723	132.05	7A	TGCAGGAGGAAGCGTTGTCGCCGCTCGCCATCCTGCCCGCGCGCTCCTTCCAGCATGATGCCG	C/G	0	10131	-1	31	3	75	78	1	0.812834	A	B	B	B	A	B	A	B	A	A	A	B	A	A	A	-	B	B	A	A	A	B	A	B	A	B	A	B	A	B	B	A	A	B	A	A
*synopGBS201	140.5	7A	TGCAGAGGAGTCACGCTCATGCATGCATGCACACACACACACATGAACATGCATGCATGTGAG	C/T	0	2056	-1	41	3	84	80	6	0.84492	A	B	B	B	A	B	A	B	A	A	A	B	A	A	A	B	B	B	B	A	A	B	B	B	A	B	A	B	A	B	B	A	A	B	A	A
*synopGBS809	145.81	7A	TGCAGGCCCATTAGAAAAGGCCCAAGCTGGAACGAAACATTATCTCTGTTCACAGGGACGTGG	A/G	0	10819	-1	38	3	78	83	4	0.839572	A	B	A	B	A	B	A	B	A	A	A	B	A	A	A	B	B	B	B	A	A	B	B	B	A	B	A	B	A	B	B	A	B	B	A	A
*synopGBS1438	149.95	7A	TGCAGTTGCCTCTCTGCCGCCACCAGGGAGCCGCCGTGCGCCGCGGCGGCCGTCCAGGCGGGG	C/T	0	16070	-1	33	3	82	79	7	0.823529	A	B	A	B	A	B	A	B	A	A	A	B	A	A	A	B	B	B	B	A	A	B	B	B	A	B	A	B	A	B	A	A	B	B	A	A
*synopGBS470	149.95	7A	TGCAGCCTCCCGAAGGTGTTGTGGCAAGAATTTCTCTGTTTCGATGGCGATGACGGGGTGGAG	C/T	0	6389	-1	5	3	82	92	3	0.914439	A	B	A	B	A	B	A	B	A	A	A	B	A	A	A	B	B	B	B	A	A	B	B	B	A	B	A	B	A	B	A	A	B	B	A	A
*synopGBS717	156.48	7A	TGCAGGAGAGAGACGACCGAGTCTGCGTGGAGTCCGCGTGCAATCCTGTGCGTCGGAGGACAG	C/T	0	10003	-1	34	3	77	84	5	0.834225	A	B	A	B	A	B	A	B	A	A	A	B	A	A	A	B	A	B	B	A	A	B	B	B	A	B	A	B	A	B	A	B	B	B	A	A
*synopGBS859	156.48	7A	TGCAGGCTTGTAGGGAGGGTCTTCATACCAGAACACGCAAATATGCGAAGTTGTTGGAGAGAT	A/G	0	11435	-1	31	3	76	85	10	0.807487	A	B	A	B	A	B	A	B	A	A	A	B	A	A	A	B	A	B	B	A	A	B	B	B	A	B	A	B	A	B	A	B	B	B	A	A
*synopGBS1000	157.31	7A	TGCAGGTTCCACCATTGCTCTCCGTCAACCTCAAAGGACTGCATCACGAATCACGATTCGTTT	A/G	0	12891	-1	13	3	81	92	8	0.882353	A	B	A	B	A	B	A	B	A	A	A	B	A	A	A	B	A	B	B	A	A	B	B	B	A	B	A	A	A	B	A	B	B	B	A	A
*synopGBS1001	157.31	7A	TGCAGGTTCCACCATTGCTCTCCGTCAACCTCAAAGGACTGCATCACGAATCACGATTCGTTT	A/T	0	12892	-1	37	3	86	92	13	0.882353	A	B	A	B	A	B	A	B	A	A	A	B	A	A	A	B	A	B	B	A	A	B	B	B	A	B	A	A	A	B	A	B	B	B	A	A
*synopGBS1002	157.31	7A	TGCAGGTTCCACCGTTGCTCTCCGTCAACCTCAAAGGTCTGCCTCACGAATCACAATTCGTTT	A/G	0	12893	-1	54	1	67	88	5	0.802139	A	B	A	B	A	B	A	B	A	A	A	B	A	A	A	B	A	B	B	A	A	B	B	B	A	B	A	A	A	B	A	B	B	B	A	A
*synopGBS852	167.79	7A	TGCAGGCTGTCTGTGAATTCACCGCCTTGTGGGTTCAGCTACAGGGGGTGGCGCTAGGCCAGC	A/G	0	11403	-1	16	3	80	93	8	0.882353	A	B	A	B	A	B	A	B	A	B	A	B	A	A	A	B	A	B	B	A	B	B	B	B	A	B	A	A	A	B	A	B	B	B	A	A
*synopGBS396	170.19	7A	TGCAGCATTGAATTCCTTTCGAACTGAAGCGCTGGCTGCCCTGGATCTTGAGGACTGCTAAGC	G/T	0	5080	-1	34	3	103	82	12	0.925134	A	B	A	B	A	B	B	B	A	B	A	B	A	A	A	B	A	B	B	A	B	B	B	B	A	B	A	A	A	B	A	B	B	B	B	A
*synopGBS397	170.19	7A	TGCAGCATTGAATTCCTTTCGAACTGAAGCGCTGGCTGCTCTGGATCTTCAGGACTGCTAAGC	G/T	0	5081	-1	34	1	103	82	12	0.925134	A	B	A	B	A	B	B	B	A	B	A	B	A	A	A	B	A	B	B	A	B	B	B	B	A	B	A	A	A	B	A	B	B	B	B	A
*synopGBS1066	180.3	7A	TGCAGTACACGGGGGGATCAGCGACAGGAGGACCATCAGCGGAGGGAAGCTTGGCCTTGGTGT	A/G	0	13301	-1	8	3	92	65	7	0.802139	A	B	A	B	A	-	A	B	A	B	A	B	A	B	A	B	A	B	B	A	B	-	B	B	A	B	A	A	A	B	A	B	B	-	B	A
*synopGBS1067	180.3	7A	TGCAGTACACGGGGGGATCAGCGACAGGAGGACCATCAGCGGAGGGAAGCTTGGCCTTGGTGT	G/A	0	13302	-1	40	3	92	65	7	0.802139	A	B	A	B	A	-	A	B	A	B	A	B	A	B	A	B	A	B	B	A	B	-	B	B	A	B	A	A	A	B	A	B	B	-	B	A
*synopGBS582	180.3	7A	TGCAGCTCCGTCTGCGCCCAATCGTCGCGTGCCCACTTCAAGTCCGCCGCTTCGTCGAGCTCC	A/G	0	8222	-1	40	1	85	97	10	0.919786	A	B	A	B	A	A	A	B	A	B	A	B	A	B	A	B	A	B	B	A	B	A	B	B	A	B	A	A	A	B	A	B	B	A	B	A
*synopGBS405	181.24	7A	TGCAGCCAAAGGATTCCCATCTAGAAAAGAGCCAAACAATCTTCATCCCCGTCCCAATCAAAG	A/G	0	5135	-1	35	1	73	84	7	0.802139	A	B	A	B	A	A	A	B	-	B	A	B	A	B	A	B	A	B	B	A	B	A	B	B	A	B	A	A	-	B	A	B	B	A	B	A
*synopGBS946	184.91	7A	TGCAGGTATGACTGGGCTGCGAAGAAGAGCCTGCGATCTGGCTACTTCCTGTGGGCGGCGTCG	C/T	0	12285	-1	44	3	89	86	5	0.909091	A	B	A	B	-	A	-	B	-	B	A	B	A	B	A	B	A	-	B	A	-	-	B	B	A	B	A	A	B	A	A	B	B	A	B	A
*synopGBS1014	6.37	7B	TGCAGGTTGCCCCGTCCCCACTGCCGCTCCTCCTCTCACATAGTCCGCCCCCGACAACTGTTT	A/C	0	12962	-1	39	3	79	86	4	0.860963	A	B	B	A	A	-	B	B	B	B	-	B	A	B	A	B	B	B	A	B	-	B	B	-	B	A	B	B	B	A	A	B	A	A	-	B
*synopGBS1015	6.37	7B	TGCAGGTTGCCCCGTCCCCACTGCCGCTCCTCCTCTCACATAGTCCGCCCCCGACAACTGTTT	A/G	0	12963	-1	55	3	82	84	5	0.860963	A	B	B	A	A	-	B	B	B	B	-	B	A	B	A	B	B	B	A	B	-	B	B	-	B	A	B	B	B	A	A	B	A	A	-	B
*synopGBS1251	6.37	7B	TGCAGTGAGAAGGAGGAGACCGTCGGACTGATTGGCATCGTCGAGGGCGGAGTGGAACTTGAT	A/C	0	14688	-1	16	3	79	83	3	0.850267	A	B	B	A	A	A	B	B	B	B	A	B	A	B	A	-	B	B	A	B	A	B	B	-	B	A	B	B	B	A	A	B	A	A	-	B
*synopGBS1252	6.37	7B	TGCAGTGAGAAGGAGGAGACCGTCGGACTGATTGGCATCGTCGAGGGCGGAGTGGAACTTGAT	T/A	0	14689	-1	32	3	79	83	3	0.850267	A	B	B	A	A	A	B	B	B	B	A	B	A	B	A	-	B	B	A	B	A	B	B	-	B	A	B	B	B	A	A	B	A	A	-	B
*synopGBS508	6.37	7B	TGCAGCGCATCGCTTACCCCAACATGTCGATCTACCCGATCGCCACGATGTTCGTCCTGGCCT	C/T	0	7019	-1	18	1	86	93	8	0.914439	A	B	B	A	A	A	B	B	B	B	A	B	A	B	A	-	B	B	A	B	A	B	B	-	B	A	B	B	B	A	A	B	A	A	A	B
*synopGBS641	6.37	7B	TGCAGCTTCTCCTCGACATCGATTACGGCCTCCGTCTCCCAACCACCATCCGCCAATGAGAGA	A/G	0	9199	-1	54	3	80	77	5	0.812834	A	B	B	A	A	A	B	B	B	B	A	B	A	B	A	A	B	B	A	B	A	B	B	A	B	A	B	B	B	A	A	B	A	A	A	B
*synopGBS71	6.37	7B	TGCAGAATCCCATGAGACCATATCGGCACCTGCCGTCTCATCGTGCGCGCAGAGAGAGCCGTC	A/G	0	783	-1	50	3	93	81	4	0.909091	A	B	B	A	A	A	B	B	B	B	A	B	A	B	A	B	B	B	A	B	A	B	B	A	B	A	B	B	B	A	A	B	A	A	A	B
*synopGBS783	6.37	7B	TGCAGGCAGCAGCAGAGCGGATGAGGGGGACGGGGTCCGAGCGTGCGATGATCTCGAGCACAA	A/C	0	10606	-1	13	3	85	71	3	0.818182	A	B	B	A	A	A	B	B	B	B	A	B	A	B	A	B	B	B	A	B	A	B	B	A	B	A	B	B	B	A	A	B	A	A	A	B
*synopGBS277	7.31	7B	TGCAGATGATAGTTGATGGTTTCATATGTAATTTCACTGAAATTCTAAGGCTCGGGCGAATTT	A/G	0	2902	-1	35	3	74	85	9	0.802139	A	B	B	A	A	A	B	B	B	B	A	B	A	B	A	B	B	B	A	B	A	B	B	-	B	A	B	B	B	A	A	B	A	A	A	B
*synopGBS278	7.31	7B	TGCAGATGATAGTTGATGGTTTCATATGTAATTTCACTGAAATTCTAAGGCTCGGGCGAATTT	A/G	0	2903	-1	46	3	74	85	9	0.802139	A	B	B	A	A	A	B	B	B	B	A	B	A	B	A	B	B	B	A	B	A	B	B	-	B	A	B	B	B	A	A	B	A	A	A	B
*synopGBS868	8.3	7B	TGCAGGGAAGACGCAGGCTTAGGCGTGCCTCGGAGCTTCTCTCTGAGCGGGGGGAGCGGAACG	A/G	0	11485	-1	10	3	72	87	7	0.812834	A	B	B	A	A	A	B	B	B	B	A	B	A	B	A	B	B	B	A	B	A	B	B	B	B	A	B	B	B	A	A	B	A	A	A	B
*synopGBS869	8.3	7B	TGCAGGGAAGACGCAGGCTTAGGCGTGCCTCGGAGCTTCTCTCTGAGCGGGGGGAGCGGAACG	C/T	0	11486	-1	11	3	72	87	7	0.812834	A	B	B	A	A	A	B	B	B	B	A	B	A	B	A	B	B	B	A	B	A	B	B	B	B	A	B	B	B	A	A	B	A	A	A	B
*synopGBS1033	10.08	7B	TGCAGGTTTGCAAACGAACATTGTCAGAAACGATATTCAGGTTCTTGAACGGACTGAGGAACA	A/G	0	13065	-1	19	3	82	92	7	0.893048	A	B	B	A	A	A	B	B	B	B	A	B	A	B	B	B	B	B	A	B	A	B	B	B	B	A	B	B	B	A	A	B	A	A	A	B
*synopGBS586	10.08	7B	TGCAGCTCCTGAAAACAGGGCTGGTTTGGCGTGTGGGGAACGACAACACAATTAGGATTTGGC	A/G	0	8259	-1	42	1	75	89	8	0.834225	A	B	B	A	A	A	B	B	B	B	A	B	A	B	B	B	B	B	A	B	A	B	B	B	B	A	B	B	B	A	A	-	A	A	A	B
*synopGBS1322	10.82	7B	TGCAGTGGTGAGACCGTTGTGGCGTCGCTCGCAAATCAGCGGGCTCGACGGCGTCATGCACGG	C/G	0	15229	-1	13	3	80	78	5	0.818182	A	B	B	A	A	A	B	B	B	B	A	B	A	B	B	B	B	B	A	B	A	B	B	B	B	A	B	B	B	A	A	A	A	A	A	B
*synopGBS1380	10.82	7B	TGCAGTTCACGTCAGCAACATCCCTTGATGTCAGGTTCAGCAAATCTGGCTGCGCCCATTGTC	T/C	0	15687	-1	59	2	90	89	8	0.914439	A	B	B	A	A	A	B	B	B	B	A	B	A	B	B	B	B	B	A	B	A	B	B	B	B	A	B	B	B	A	A	A	A	A	A	B
*synopGBS908	10.82	7B	TGCAGGGTCCTGACAGACCATCCTTCACAGATGCCGAAGGATCAGGAAGATAACGCAAGTTGC	C/T	0	11995	-1	21	3	100	87	8	0.957219	A	B	B	A	A	A	B	B	B	B	A	B	A	B	B	B	B	B	A	B	A	B	B	B	B	A	B	B	B	A	A	A	A	A	A	B
*synopGBS148	11.64	7B	TGCAGACGACAACGGGGAGGATGTCGATGCGGAACGGGGATAAGGAGAATCTCCTTGGAAAGT	A/C	0	1343	-1	20	3	80	98	10	0.898396	A	B	B	A	A	A	B	B	B	B	A	B	A	B	B	B	B	B	A	B	A	B	B	B	B	A	B	B	B	A	A	A	A	A	A	B
*synopGBS309	11.64	7B	TGCAGATTATGAGAGAGTGCTAAGGGGCACTGCACCATCTCGGTCCGCGGTTCGCTGTCCCCG	C/T	0	3195	-1	60	3	84	93	4	0.925134	A	B	B	A	A	A	B	B	B	B	A	B	A	B	B	B	B	B	A	B	A	B	B	B	B	A	B	B	B	A	A	A	A	A	A	B
*synopGBS310	11.64	7B	TGCAGATTATGAGAGAGTGCTAAGGGGCACTGCACCATCTCGGTCCGCGGTTCGCTGTCCCCG	A/G	0	3196	-1	63	3	84	93	4	0.925134	A	B	B	A	A	A	B	B	B	B	A	B	A	B	B	B	B	B	A	B	A	B	B	B	B	A	B	B	B	A	A	A	A	A	A	B
*synopGBS1061	12.37	7B	TGCAGTACAACACTCCATACAATCCATACTAGGCAGCGCAGCTCCGACTCCGACGAAGAACTA	C/T	0	13280	-1	23	1	90	90	8	0.919786	A	B	B	A	A	A	B	B	B	B	A	B	A	B	B	B	B	B	A	B	A	B	B	B	B	A	B	B	B	A	A	A	A	A	A	B
*synopGBS937	12.37	7B	TGCAGGTAGGCATGCACCCGTCGACCCGTGTGTCGTCATAATTTTCAGGCGGGAAGCTGGTTA	C/T	0	12223	-1	16	2	97	96	10	0.97861	A	B	B	A	A	A	B	B	B	B	A	B	A	B	B	B	B	B	A	B	A	B	B	B	B	A	B	B	B	A	A	A	A	A	A	B
*synopGBS334	15.77	7B	TGCAGCAAACACATGCACAAGTTCATAATAACCAACCAAAAGTATATTTTTCCCAGTGCTTCT	A/C	0	3477	-1	7	3	77	83	3	0.839572	A	B	B	A	A	A	B	B	B	B	A	B	A	B	B	B	B	B	A	B	A	B	B	B	B	A	A	B	B	A	A	A	A	A	A	B
*synopGBS482	15.77	7B	TGCAGCCTCTTCTGCCCCACGCCATCTCTGGGCGACATCATCGTGAACAAGTACAACCTGCGC	C/T	0	6484	-1	60	2	85	86	6	0.882353	A	B	B	A	A	A	B	B	B	B	A	B	A	B	B	B	B	B	A	B	A	B	B	B	B	A	A	B	B	A	A	A	A	A	A	B
*synopGBS1233	18.49	7B	TGCAGTCTGTACTCTGCACCTGTTGTTGAGAAACCAATGGTGAATTTTGTGGTTGCAGGAATG	A/G	0	14536	-1	43	3	67	86	1	0.812834	A	B	B	A	A	A	B	B	B	B	A	B	A	B	B	B	B	B	A	B	A	B	B	B	B	A	A	B	B	A	A	A	-	A	A	B
*synopGBS1234	18.49	7B	TGCAGTCTGTACTCTGCACCTGTTGTTGAGAAACCAATGGTGAATTTTGTGGTTGCAGGAATG	A/G	0	14537	-1	59	3	67	86	1	0.812834	A	B	B	A	A	A	B	B	B	B	A	B	A	B	B	B	B	B	A	B	A	B	B	B	B	A	A	B	B	A	A	A	-	A	A	B
*synopGBS1359	31.33	7B	TGCAGTTAGCCACCGCTTTATCTCTCCACGTATCTCATCTAGAACTTCCCTGTATGCAGAAAA	C/G	0	15545	-1	9	3	83	75	6	0.812834	A	B	B	A	A	A	B	A	B	B	A	B	A	A	B	B	B	B	A	B	A	B	B	B	B	A	A	B	B	A	A	A	B	A	A	-
*synopGBS1333	32.27	7B	TGCAGTGTGAAGGGGCGATTTGGAGGCGATCCCCGCCCCCCTCCACTTCATGATCGATCGCGA	A/G	0	15350	-1	10	3	91	69	9	0.807487	A	B	B	A	A	A	B	A	B	B	A	B	A	A	B	B	B	B	A	A	A	A	B	B	B	A	A	B	B	A	A	A	B	A	A	-
*synopGBS433	32.27	7B	TGCAGCCATCAAGATAGTCCTGCTTCGGTACAAGGCCACCAAGTGATGGACATCAAGCGGCAG	G/T	0	5517	-1	42	3	74	80	4	0.802139	A	B	B	A	A	A	B	A	B	B	A	B	A	A	B	B	B	B	A	A	A	A	B	B	B	A	A	B	B	A	A	A	B	A	A	A
*synopGBS947	33.24	7B	TGCAGGTATGTCCCTGTCGAGACGTGCCAGAGGTACAAGAGGCGGCCATCCCAATGCCTTGGC	C/T	0	12294	-1	13	3	63	95	7	0.807487	A	B	B	A	A	A	B	A	B	B	A	B	A	A	B	B	B	B	A	A	A	A	B	B	B	A	A	B	B	A	A	A	B	A	A	A
*synopGBS708	54.58	7B	TGCAGGACTAGAACCCACGGCGACGGACAAGGTCATGTCGAGCGAAGCGAACCTCGCACAGCT	A/C	0	9931	-1	11	3	83	83	2	0.877005	A	B	B	A	A	B	B	A	B	B	A	B	B	A	B	B	B	B	A	A	A	A	B	B	B	A	A	A	B	A	A	A	B	A	A	A
*synopGBS709	54.58	7B	TGCAGGACTAGAACCCACGGCGACGGACAAGGTCATGTCGAGCGAAGCGAACCTCGCACAGCT	A/C	0	9932	-1	44	2	83	83	2	0.877005	A	B	B	A	A	B	B	A	B	B	A	B	B	A	B	B	B	B	A	A	A	A	B	B	B	A	A	A	B	A	A	A	B	A	A	A
*synopGBS1077	59.85	7B	TGCAGTACGAACTAGGAAAAATAGAGCAGCACTCAACAAGAAAAAAATACAAAGCAGAGCAGA	A/G	0	13371	-1	51	3	75	85	6	0.823529	A	B	B	-	A	B	B	A	B	B	A	B	B	A	B	B	B	B	A	A	-	A	B	B	B	A	A	A	B	A	A	A	B	A	A	B
*synopGBS313	68.8	7B	TGCAGATTCCATGGCATCCCTTTGTGATGTTAGATGATCTCGTTTCCCCGCTGTTCGGATGGG	C/T	0	3220	-1	8	3	83	94	7	0.909091	A	B	B	-	A	B	B	A	B	A	A	B	B	A	B	B	B	B	A	A	B	A	B	B	B	A	A	A	B	A	A	A	B	A	A	B
*synopGBS314	68.8	7B	TGCAGATTCCATGGCATCCCTTTGTGATGTTAGATGATCTCGTTTCCCCGCTGTTCGGATGGG	T/G	0	3221	-1	34	2	83	94	7	0.909091	A	B	B	-	A	B	B	A	B	A	A	B	B	A	B	B	B	B	A	A	B	A	B	B	B	A	A	A	B	A	A	A	B	A	A	B
*synopGBS474	68.8	7B	TGCAGCCTCCTCTCCACCCGTTGCGATGCTCTATCCCCCGAGCTTGTTCCTGCTTCGGGCGTT	C/G	0	6415	-1	8	3	87	73	3	0.839572	A	B	B	B	A	B	B	A	B	A	A	B	B	A	B	B	B	B	A	A	B	A	B	B	B	A	A	A	B	A	A	A	B	A	A	B
*synopGBS226	73.53	7B	TGCAGATCATGATGTACATGTGGAGGAACCCCTCGACACACCAGTGCCCCGTATCTTGATCAA	A/G	0	2555	-1	23	3	80	88	2	0.887701	A	B	B	B	A	-	B	A	B	A	A	B	B	A	B	B	B	B	A	A	B	A	B	B	B	A	A	A	B	A	A	A	B	A	A	B
*synopGBS935	75.75	7B	TGCAGGTAGCTTTTCCCGCCGCCTGACCGCTTGTCTATATGAATACATGCATGCATATTGTTG	A/C	0	12220	-1	36	3	89	87	5	0.914439	A	B	B	B	A	-	B	A	B	A	A	B	B	A	B	B	B	B	A	A	B	A	B	B	B	A	A	A	B	A	A	A	B	A	A	B
*synopGBS936	75.75	7B	TGCAGGTAGCTTTTCCCGCCGCCTGACCGCTTGTCTATATGAATACATGCATGCATATTGTTG	A/C	0	12221	-1	38	3	89	87	5	0.914439	A	B	B	B	A	-	B	A	B	A	A	B	B	A	B	B	B	B	A	A	B	A	B	B	B	A	A	A	B	A	A	A	B	A	A	B
*synopGBS448	78.25	7B	TGCAGCCCGTGCCGATGCATGTCGGCATGACGATGGAGCAGGCACAGGCGCACTTCAACACCT	A/G	0	5877	-1	59	3	72	83	4	0.807487	A	B	B	B	A	A	B	A	B	A	A	B	B	A	B	B	B	B	A	A	B	A	B	B	B	A	A	A	B	A	A	A	B	A	A	B
*synopGBS469	81.3	7B	TGCAGCCTCCATGCTGCGACAAGAAGAAAGATTAGCACGGCGTGGAGAAGATGGAGGCATCTG	C/T	0	6375	-1	16	1	74	89	7	0.834225	A	B	B	B	A	A	B	A	B	A	A	B	B	A	B	B	B	B	A	A	B	A	B	B	B	A	A	A	B	A	A	A	B	A	A	B
*synopGBS498	81.3	7B	TGCAGCCTTTCCCTGAAGCACTATAACAATGTAAGATAAACAGTGCACGCACGCATGCACAAG	A/G	0	6649	-1	25	3	83	70	2	0.807487	A	B	B	B	A	A	B	A	B	A	A	B	B	A	B	B	B	B	A	A	B	A	B	B	B	A	A	A	B	A	A	A	B	A	A	B
*synopGBS910	81.3	7B	TGCAGGGTGTTGTGGTGGTAGTGCTGAACACCCCTGGACCATGGAGATGGAGAGGACATTACC	A/G	0	12061	-1	60	3	68	85	1	0.812834	A	B	B	B	A	A	B	A	B	A	A	B	B	A	B	B	B	B	A	A	B	A	B	B	B	A	A	A	B	A	A	A	B	A	A	B
*synopGBS141	87.25	7B	TGCAGACCTGGTTAGCAGGGCCGCAACATTCCAAGACCCAGATAGGTTCTGCGCATGCAGAGG	A/C	0	1312	-1	43	3	91	77	8	0.855615	A	B	B	B	A	A	B	B	B	A	A	B	B	A	B	B	B	B	A	A	B	A	B	B	B	A	A	A	B	A	A	A	B	-	A	B
*synopGBS393	88.17	7B	TGCAGCATGTACGGACCACGGTCTCCACTGATATGAACGCCCATCTAACGGCAAATTGTACAG	A/G	0	5030	-1	52	3	70	86	5	0.807487	A	B	B	B	A	A	B	B	B	A	A	B	B	A	B	B	B	B	A	A	B	A	B	B	B	A	A	A	B	A	A	A	B	B	A	B
*synopGBS487	89.96	7B	TGCAGCCTGCATGTCCTCATCCTCATCCTCATTCCTACACTCAGTACGATGCACATGAGTGTA	T/C	0	6517	-1	32	3	89	85	8	0.887701	A	B	B	B	A	A	B	B	B	A	A	B	B	A	B	B	B	B	A	A	B	A	B	B	B	A	A	A	B	A	A	A	B	A	A	B
*synopGBS606	89.96	7B	TGCAGCTGATCTGAACAACTCACCTGTCTAACTGCTCTAACGATTCTACTCTGCCCGCTCTCC	C/G	0	8616	-1	27	3	82	80	3	0.850267	A	B	B	B	A	A	B	B	B	A	A	B	B	A	B	B	B	B	A	A	B	A	B	B	B	A	A	A	B	A	A	A	B	A	A	B
*synopGBS1190	91.56	7B	TGCAGTCGAGACGGACAACAAAGGCAGTTCACGGCGCAGCCGAATTGTGACAGAAAATGAACC	A/G	0	14276	-1	14	3	85	77	1	0.860963	A	B	B	B	A	A	B	B	B	A	A	B	B	A	B	B	B	B	A	A	B	A	B	B	B	A	A	A	B	A	A	A	B	B	A	B
*synopGBS1191	91.56	7B	TGCAGTCGAGACGGACAACAAAGGCAGTTCACGGCGCAGCCGAATTGTGACAGAAAATGAACC	C/T	0	14277	-1	36	3	85	77	1	0.860963	A	B	B	B	A	A	B	B	B	A	A	B	B	A	B	B	B	B	A	A	B	A	B	B	B	A	A	A	B	A	A	A	B	B	A	B
*synopGBS1391	91.56	7B	TGCAGTTCCAGCAGTGCGCGCCATTCAGCCTCGCCAGCCTGCGCTCTCCCGAGGACGTTCGGC	T/G	0	15754	-1	58	2	94	76	4	0.887701	A	B	B	B	A	A	B	B	B	A	A	B	B	A	B	B	B	B	A	A	B	A	B	B	B	A	A	A	B	A	A	A	B	B	A	B
*synopGBS628	91.56	7B	TGCAGCTTCACCGAGGGCCACCATGGGTGATTCGCCTCACTCTGCCCCTCGGCGTCCGCTTTA	C/G	0	9084	-1	11	3	83	96	11	0.898396	A	B	B	B	A	A	B	B	B	A	A	B	B	A	B	B	B	B	A	A	B	A	B	B	B	A	A	A	B	A	A	A	B	B	A	B
*synopGBS1034	93.2	7B	TGCAGGTTTGCAGCTCAAATTTTCACTCGCTGAATACTCTGCTAGACATTTCATCAAACGCCT	A/C	0	13066	-1	16	2	74	93	3	0.877005	A	B	B	B	A	A	B	B	B	A	A	B	B	A	B	B	B	A	A	A	B	A	B	B	B	A	A	A	B	A	A	A	B	B	A	B
*synopGBS1035	93.2	7B	TGCAGGTTTGCAGCTCAAATTTTCACTCGCTGAATACTCTGCTAGACATTTCATCAAACGCCT	T/A	0	13067	-1	19	2	74	93	3	0.877005	A	B	B	B	A	A	B	B	B	A	A	B	B	A	B	B	B	A	A	A	B	A	B	B	B	A	A	A	B	A	A	A	B	B	A	B
*synopGBS856	93.2	7B	TGCAGGCTTGCAGCTCCAAATTTCACTCGCTGAATACTCTGCTAGACATTTCATCAAACGCCT	C/A	0	11428	-1	16	3	93	74	3	0.877005	A	B	B	B	A	A	B	B	B	A	A	B	B	A	B	B	B	A	A	A	B	A	B	B	B	A	A	A	B	A	A	A	B	B	A	B
*synopGBS857	93.2	7B	TGCAGGCTTGCAGCTCCAAATTTCACTCGCTGAATACTCTGCTAGACATTTCATCAAACGCCT	A/T	0	11429	-1	19	3	93	74	3	0.877005	A	B	B	B	A	A	B	B	B	A	A	B	B	A	B	B	B	A	A	A	B	A	B	B	B	A	A	A	B	A	A	A	B	B	A	B
*synopGBS113	96.59	7B	TGCAGACATGCAAACCCGCCAGGCGGGTCAACGGTGATTTAGAGACGCAGTAGCGGAGGGGGC	G/T	0	1124	-1	57	3	73	86	1	0.84492	A	B	B	B	A	A	B	B	B	A	A	B	B	A	B	B	B	A	B	A	B	A	B	B	B	A	A	A	B	A	A	A	B	B	A	B
*synopGBS208	96.59	7B	TGCAGATACGAACCGTTCGACGCACTCAACACCCCAGAGAAATCAAGGAAGAGGTGCTCCAAG	T/C	0	2370	-1	54	3	94	72	5	0.860963	A	B	B	B	A	A	B	B	B	A	A	B	B	A	B	B	B	A	B	A	B	A	B	B	B	A	A	A	B	A	A	A	B	B	A	B
*synopGBS209	96.59	7B	TGCAGATACGAACCGTTCGACGCACTCAACACCCCAGAGAAATCAAGGTAGAGGCGCTCCAAG	C/T	0	2371	-1	54	1	72	94	5	0.860963	A	B	B	B	A	A	B	B	B	A	A	B	B	A	B	B	B	A	B	A	B	A	B	B	B	A	A	A	B	A	A	A	B	B	A	B
*synopGBS356	97.35	7B	TGCAGCACGAGCGTGGTCTGAGGCGGGCAGGGATCGAGTCAAACGGAGCTCAAGACGTGTAGG	G/A	0	4105	-1	45	3	95	79	3	0.914439	A	B	B	B	A	A	B	B	B	A	A	B	B	A	B	B	B	A	B	A	B	A	B	B	B	A	A	A	B	A	A	A	B	B	A	B
*synopGBS357	97.35	7B	TGCAGCACGAGCGTGGTCTGAGGCGTGCAGGGATCGAGTCAAACGAAGCTCAAGACGTGTAGG	A/G	0	4106	-1	45	1	79	94	3	0.909091	A	B	B	B	A	A	B	B	B	A	A	B	B	A	B	B	B	A	B	A	B	A	B	B	B	A	A	A	B	A	A	A	B	B	A	B
*synopGBS485	97.35	7B	TGCAGCCTGATCTCCGCCGCTACCGCCTCCGCTGACCTTCGCAGAACCGCCTCGCCGAGGCAC	C/G	0	6504	-1	5	3	90	90	4	0.941176	A	B	B	B	A	A	B	B	B	A	A	B	B	A	B	B	B	A	B	A	B	A	B	B	B	A	A	A	B	A	A	A	B	B	A	B
*synopGBS595	97.35	7B	TGCAGCTCGAGGTTCTGCTGCGTTAATGACAGAGGGGGCGTTGATGATCAACTATCCGACGTT	C/T	0	8322	-1	38	3	102	74	9	0.893048	A	B	B	B	A	A	B	B	B	A	A	B	B	A	B	B	B	A	B	A	B	A	B	B	B	A	A	A	B	A	A	A	B	B	A	B
*synopGBS1039	99.9	7B	TGCAGGTTTTCATTCTAGGTTTCTCCTAGAAAACCGATTTAGAGCGGCCGAGGTTTGGCTCCT	G/A	0	13081	-1	45	3	93	72	2	0.871658	A	B	B	B	A	A	B	B	B	A	A	B	B	A	B	B	B	A	-	A	B	A	B	B	B	A	A	A	B	A	A	A	B	B	A	B
*synopGBS1040	99.9	7B	TGCAGGTTTTCATTCTAGGTTTCTCCTAGAAAACCGATTTAGAGCGGCCGAGGTTTGGCTCCT	C/A	0	13082	-1	48	3	93	72	2	0.871658	A	B	B	B	A	A	B	B	B	A	A	B	B	A	B	B	B	A	-	A	B	A	B	B	B	A	A	A	B	A	A	A	B	B	A	B
*synopGBS1041	99.9	7B	TGCAGGTTTTCATTCTAGTTTTCTCCTAGAAAACCGATTTAGAGCAGCAGAGGTTTGGCTCCT	A/G	0	13083	-1	45	2	72	93	2	0.871658	A	B	B	B	A	A	B	B	B	A	A	B	B	A	B	B	B	A	-	A	B	A	B	B	B	A	A	A	B	A	A	A	B	B	A	B
*synopGBS1042	99.9	7B	TGCAGGTTTTCATTCTAGTTTTCTCCTAGAAAACCGATTTAGAGCAGCAGAGGTTTGGCTCCT	A/C	0	13084	-1	48	2	72	93	2	0.871658	A	B	B	B	A	A	B	B	B	A	A	B	B	A	B	B	B	A	-	A	B	A	B	B	B	A	A	A	B	A	A	A	B	B	A	B
*synopGBS1085	99.9	7B	TGCAGTACTCCTCGTCAGACCAGCAGTGTTCGTCCAGGGCGGGGCCCTCGGGGAGCTTGGGGG	A/G	0	13421	-1	16	2	83	75	2	0.834225	A	B	B	B	A	A	B	B	B	A	A	B	B	A	B	B	B	A	A	A	B	A	B	B	B	A	A	A	B	A	A	A	B	B	A	B
*synopGBS955	99.9	7B	TGCAGGTCAGGAAAGAGCTGTGATCAAAGCAGGCGATGTTTCACTTCTTATTATGCCCTGAGC	G/C	0	12341	-1	54	3	90	71	3	0.84492	A	B	B	B	A	A	B	B	B	A	A	B	B	A	B	B	B	A	A	A	B	A	B	B	B	A	A	A	B	A	A	A	B	B	A	B
*synopGBS112	101.64	7B	TGCAGACATGCAAACCCGCCAGGCGGGTCAACGGTGATTTAGAGACGCAGTAGCGGAGGGGGC	C/T	0	1123	-1	23	3	73	86	1	0.84492	A	B	B	B	A	A	B	B	B	A	A	B	B	A	B	B	B	A	B	A	B	A	B	B	B	A	A	A	B	A	A	A	B	B	A	B
*synopGBS1437	102.44	7B	TGCAGTTGCCGCCGCAGCCGAGGCAGGTCGCCTCCGTGCCTACAAGCCTCGGATCCATGGGAA	A/C	0	16065	-1	15	3	83	97	5	0.935829	A	B	B	B	A	A	B	B	B	B	A	B	B	A	B	B	B	A	B	A	B	A	B	B	B	A	A	A	B	A	A	A	B	B	A	B
*synopGBS1181	103.17	7B	TGCAGTCCTATTACGCCGCCTCGCAGCAGTACCAGCAGCAGCACCAGCACCAGCAGCAGCAGC	C/T	0	14207	-1	49	2	75	89	2	0.86631	A	B	B	B	A	A	B	B	B	B	A	B	B	A	B	B	B	A	B	A	B	A	B	B	B	A	A	A	B	A	A	A	B	B	A	B
*synopGBS324	103.17	7B	TGCAGATTGGCAGCGACCAAAGGGGAAGGGCGGTCCGCTGCAATTGGTGGGCAGGAAACCCGA	A/G	0	3315	-1	5	3	98	80	6	0.919786	A	B	B	B	A	A	B	B	B	B	A	B	B	A	B	B	B	A	B	A	B	A	B	B	B	A	A	A	B	A	A	A	B	B	A	B
*synopGBS514	103.17	7B	TGCAGCGGAAGAGAACTTGTGGCGTGGGTCGCCGAAGATGAAGAAGGGCGTTCCCCGCGTCAA	C/G	0	7282	-1	15	3	78	81	3	0.834225	A	B	B	B	A	A	B	B	B	B	A	B	B	A	B	B	B	A	B	A	B	A	B	B	B	A	A	A	B	A	A	A	B	B	A	B
*synopGBS1144	104.02	7B	TGCAGTCAAACCTAATTTTACCTCACGGTCATTTTCGTAGTCCAATGACAAGTGGACTCACGT	C/G	0	13851	-1	21	3	87	80	8	0.850267	A	B	B	B	A	A	B	A	B	B	A	B	B	A	B	B	B	A	A	A	B	A	B	B	B	A	A	A	B	A	A	A	B	B	A	B
*synopGBS738	107.76	7B	TGCAGGATCCAAACGCTGTGACTCCTTCGTAGATGTTATATCTGGAACTTCCTATTTGCCGCT	A/G	0	10286	-1	45	3	85	73	3	0.828877	A	B	B	B	A	A	B	B	B	B	A	B	B	A	B	B	B	A	B	A	B	A	B	B	B	A	A	A	B	A	A	A	B	B	A	B
*synopGBS152	109.63	7B	TGCAGACGCGCCCTTCGGTCTCTGTGCCTCGCGCCCCAGCTCGCCGTTGGCCTCTGCTCCCCT	G/T	0	1417	-1	32	3	96	73	13	0.834225	A	B	B	B	A	A	B	B	B	B	A	B	B	A	B	B	A	A	B	A	B	A	B	B	B	A	A	A	B	A	A	A	B	B	A	B
*synopGBS883	109.63	7B	TGCAGGGATTCTTCCGATGTCTGTCAACGCCACAGTTCGAGCACTTTGCTTCCTTTCTTGGTA	G/C	0	11633	-1	60	3	90	75	4	0.860963	A	B	B	B	A	A	B	B	B	B	A	B	B	A	B	B	A	A	B	A	B	A	B	B	B	A	A	A	B	A	A	A	B	B	A	B
*synopGBS952	109.63	7B	TGCAGGTATTCTTCCGATGTCTGTCAACGCCACAGTTCGAGCACTTTGCTTCCTTTCTTGCTA	C/G	0	12301	-1	60	1	75	90	4	0.860963	A	B	B	B	A	A	B	B	B	B	A	B	B	A	B	B	A	A	B	A	B	A	B	B	B	A	A	A	B	A	A	A	B	B	A	B
*synopGBS1301	112.26	7B	TGCAGTGCTACTACTACAGATGCTAACTGCTGGGAGATCCGCACATTCAAGAGAATATCCTGT	A/G	0	14995	-1	24	3	73	97	6	0.877005	A	B	B	B	A	A	B	B	B	B	A	B	B	A	B	B	A	A	B	A	B	A	B	B	B	A	A	A	B	A	A	A	B	B	A	B
*synopGBS215	112.26	7B	TGCAGATATATTCACATGCCTCAAGTTAATTGTAAGCCAGAACACTGAACATATAACCACATT	A/G	0	2421	-1	48	3	61	99	4	0.834225	A	B	B	B	A	A	B	B	B	B	A	B	B	A	B	B	A	A	B	A	B	A	B	B	B	A	A	A	B	A	A	A	B	B	A	B
*synopGBS533	113.1	7B	TGCAGCTACCTGGCGCTCCTGGACATGCCCAAGCTCGGCGAGAGCCCCTTCCCTGCGGACGAC	A/T	0	7766	-1	30	3	86	96	11	0.914439	A	B	B	B	A	A	B	B	B	B	A	B	B	A	B	B	A	A	B	A	B	A	B	B	B	A	A	A	B	A	A	A	B	B	A	B
*synopGBS589	113.1	7B	TGCAGCTCCTTGTCCGACGCCCCCGCCTTGCTCGTGTTCATGGCCATGCCGACGCCGACGCGA	C/G	0	8281	-1	5	3	99	78	4	0.925134	A	B	B	B	A	A	B	B	B	B	A	B	B	A	B	B	A	A	B	A	B	A	B	B	B	A	A	A	B	A	A	A	B	B	A	B
*synopGBS590	113.1	7B	TGCAGCTCCTTGTCCGACGCCCCCGCCTTGCTCGTGTTCATGGCCATGCCGACGCCGACGCGA	C/G	0	8282	-1	19	3	99	78	4	0.925134	A	B	B	B	A	A	B	B	B	B	A	B	B	A	B	B	A	A	B	A	B	A	B	B	B	A	A	A	B	A	A	A	B	B	A	B
*synopGBS591	113.1	7B	TGCAGCTCCTTGTCCGACGCCCCCGCCTTGCTCGTGTTCATGGCCATGCCGACGCCGACGCGA	C/G	0	8283	-1	21	3	99	78	4	0.925134	A	B	B	B	A	A	B	B	B	B	A	B	B	A	B	B	A	A	B	A	B	A	B	B	B	A	A	A	B	A	A	A	B	B	A	B
*synopGBS825	113.1	7B	TGCAGGCGATTCACCTCCACCGTTCCCTGGCCGTTGCTCAGGGGCTCACCTCGCGGGCCTTCG	C/T	0	11030	-1	48	3	74	94	5	0.871658	A	B	B	B	A	A	B	B	B	B	A	B	B	A	B	B	A	A	B	A	B	A	B	B	B	A	A	A	B	A	A	A	B	B	A	B
*synopGBS891	113.1	7B	TGCAGGGCCTCTGGCAGGGCACCCGAGAGCACGTTCCTCGACACGTCGATCTCCTCCAGGAAC	C/T	0	11728	-1	23	3	85	86	4	0.893048	A	B	B	B	A	A	B	B	B	B	A	B	B	A	B	B	A	A	B	A	B	A	B	B	B	A	A	A	B	A	A	A	B	B	A	B
*synopGBS1326	113.92	7B	TGCAGTGGTTTCGAGACGATCTCTCCATCCGTCAATTCCTAAAGACTGAGTTAGCGGGATGAT	C/T	0	15255	-1	29	3	75	99	9	0.882353	A	B	B	B	A	A	B	B	B	B	A	B	B	A	B	B	A	A	B	A	B	A	B	B	B	A	A	-	B	A	A	A	B	B	A	B
*synopGBS1343	113.92	7B	TGCAGTGTTCAGAAAACAAAACTAGAGCAGTAAGAAAAACACATGCGTCCGTTCAGCTAGATC	C/T	0	15415	-1	9	3	71	94	3	0.86631	A	B	B	-	A	A	-	-	B	B	A	B	B	-	B	B	A	A	-	A	B	A	-	B	B	A	A	-	B	A	A	A	B	B	A	B
*synopGBS864	155.56	7B	TGCAGGGAAAACCCGAGCTGCACCACCGCCGCCGCCCTCCACGCTGTCATTGCTCTTCGGGCT	C/T	0	11457	-1	41	3	74	82	3	0.818182	A	B	B	A	A	A	A	A	B	B	A	B	A	-	A	B	A	B	A	A	A	B	A	B	B	A	-	-	B	A	A	A	B	B	A	B
*synopGBS460	161.45	7B	TGCAGCCGCCGAGCCATCCTCGGGAGAATAGGAGCCATCAACAAAGACCGCTCGCCAGTCTAC	C/T	0	6112	-1	55	3	75	79	3	0.807487	A	B	B	A	A	A	A	A	B	B	A	B	A	B	A	B	A	B	A	A	A	B	A	B	B	A	B	B	B	A	-	A	B	B	A	B
*synopGBS48	169.73	7B	TGCAGAACTCTCCCTCTAGCGCGCATGCGCTGGTTGTGTCCACAGAGATCTTGACTGGGACCT	C/T	0	500	-1	19	3	93	78	6	0.882353	A	B	-	A	A	A	A	A	A	B	A	B	A	B	A	B	A	B	A	A	A	B	A	B	B	A	B	B	A	A	B	A	B	B	A	B
*synopGBS1444	179.55	7B	TGCAGTTGGAAGGAGGGAGTTGTCATCTTCCTTTGGTGGAACCTAGCATGCGCGCTTCACCAC	C/T	0	16128	-1	52	3	90	82	10	0.86631	A	B	-	A	-	A	-	A	A	B	A	-	A	B	A	-	A	B	-	A	A	B	A	B	-	A	B	-	A	B	B	A	B	-	-	B
*synopGBS170	2.48	7D	TGCAGACTCGATCGTCGCCGCCAAATTAGGGCGAGGATTCGGCCCCCCGCTCCAGATTCGCGG	C/T	0	1539	-1	6	3	73	87	7	0.818182	A	B	A	A	B	B	-	B	-	-	B	B	B	B	B	B	A	B	B	-	A	-	A	A	-	-	B	A	B	-	B	-	A	B	B	A
*synopGBS212	2.48	7D	TGCAGATAGTGCCTAATCCCCATCAAAGGCGTTGCTACCAGCGCCCCTGTGCGGACATTGGGT	A/C	0	2407	-1	26	3	82	100	10	0.919786	A	B	A	A	B	B	B	B	-	A	B	B	B	B	B	B	A	B	B	B	A	A	A	A	A	B	B	A	B	A	B	A	A	B	B	A
*synopGBS213	2.48	7D	TGCAGATAGTGCCTAATCCCCATCAAAGGCGTTGCTACCAGCGCCCCTGTGCGGACATTGGGT	T/C	0	2408	-1	31	3	82	100	10	0.919786	A	B	A	A	B	B	B	B	-	A	B	B	B	B	B	B	A	B	B	B	A	A	A	A	A	B	B	A	B	A	B	A	A	B	B	A
*synopGBS969	17.29	7D	TGCAGGTCGCCTTCCCGCTGGATCCTCAGGAGCACGTCGAGGAGGGCCTCCTCCTCCTCGTCA	G/T	0	12460	-1	29	3	90	80	5	0.882353	A	B	B	A	B	B	A	B	-	A	B	B	B	A	B	B	A	B	B	B	A	A	A	A	A	B	B	B	B	A	B	B	A	B	B	A
*synopGBS970	17.29	7D	TGCAGGTCGCCTTCCCGCTGGATCCTCAGGAGCACGTCGAGGAGGGCCTCCTCCTCCTCGTCA	C/G	0	12461	-1	56	3	95	80	10	0.882353	A	B	B	A	B	B	A	B	-	A	B	B	B	A	B	B	A	B	B	B	A	A	A	A	A	B	B	B	B	A	B	B	A	B	B	A
*synopGBS1349	24.08	7D	TGCAGTTACAATCGCTGTGGTATGGTCCCGAGTGACGACCCCACGTGTCATCGGCAGAAGGAC	A/G	0	15483	-1	7	3	95	75	8	0.86631	A	B	B	-	B	B	A	B	A	A	A	B	B	A	B	B	A	B	B	B	B	A	A	A	A	B	B	B	B	A	B	B	A	B	B	A
*synopGBS254	24.08	7D	TGCAGATCGGTGAGGGCCTGGGAACGAAGCCAGCCGTCGATCTTGCCGTAGTCACGTCGGCGG	C/G	0	2739	-1	33	3	73	95	8	0.855615	A	B	B	B	B	B	A	B	A	A	A	B	B	A	B	B	A	B	B	B	B	A	A	A	A	B	B	B	B	A	B	B	A	B	B	A
*synopGBS773	32.65	7D	TGCAGGCACGATTTATTTTCACGGCACTGCGGTACATTAGTGCGGTGAGTCGACGACGAGCTG	C/T	0	10537	-1	24	3	84	95	7	0.919786	A	B	B	B	B	B	A	B	A	A	A	B	A	A	A	B	A	B	B	B	B	A	A	A	A	B	B	B	B	A	B	B	A	B	B	A
*synopGBS1141	33.44	7D	TGCAGTATTGCCTCGAGCATCAATGATTTCAAAAAGCATTGCCTCTTTCGCTTGCAGTGATTA	C/G	0	13826	-1	17	3	85	72	4	0.818182	A	B	B	B	B	B	A	B	A	A	A	B	A	A	A	B	A	B	-	B	B	A	A	A	A	B	B	B	B	A	B	B	A	B	B	A
*synopGBS1142	33.44	7D	TGCAGTATTGCCTCGAGCATCAATGATTTCAAAAAGCATTGCCTCTTTCGCTTGCAGTGATTA	T/G	0	13827	-1	61	3	85	72	4	0.818182	A	B	B	B	B	B	A	B	A	A	A	B	A	A	A	B	A	B	-	B	B	A	A	A	A	B	B	B	B	A	B	B	A	B	B	A
*synopGBS480	40.96	7D	TGCAGCCTCTTCGAGCGATCGATTAGCGCCACAGCTACTTCTCACCTAATGAGCGCTACAATA	C/T	0	6482	-1	37	3	95	84	7	0.919786	A	B	B	B	B	B	A	B	A	A	A	B	A	A	A	B	A	B	A	B	B	A	A	A	A	B	B	B	A	A	B	B	A	B	B	A
*synopGBS701	50.36	7D	TGCAGGACGATGGCGATGAGACAAACGGCCTCTACGAAGAGGAAGGTTGACCAGTTCGTGGTG	A/G	0	9881	-1	37	3	90	95	9	0.941176	A	B	B	B	B	B	A	B	A	A	A	-	A	A	A	B	A	B	A	B	B	A	B	A	A	B	B	B	A	A	B	B	A	B	B	A
*synopGBS197	51.14	7D	TGCAGAGCGAGATGGGAGCCGATGTCACTTTTCTTGCGTGCGACGAGTCGTTTGCTGCACACA	A/G	0	1922	-1	63	1	85	82	8	0.850267	A	B	B	B	B	B	A	B	A	A	A	-	A	A	A	B	A	B	A	B	B	A	B	A	A	B	B	B	A	A	B	B	A	B	B	A
*synopGBS205	51.14	7D	TGCAGAGTGAGACGGGAGCCGATGTCACCTTTCTTGTGGGCGACGAGTCTTTTGCTGCGCATA	G/T	0	2217	-1	58	1	83	78	6	0.828877	A	B	B	B	B	B	A	B	A	A	A	A	A	A	A	B	A	B	A	B	B	A	B	A	A	B	B	B	A	A	B	B	A	B	B	A
*synopGBS501	54.77	7D	TGCAGCGAACTTCGAACCACGAAGGCACTGGTTCGAGGCAAACCAGGAGCAGAGTTTTTTGCC	C/T	0	6715	-1	62	2	88	82	13	0.839572	A	B	B	B	B	B	A	B	B	A	A	A	A	A	A	B	A	B	A	B	B	-	B	A	A	B	B	B	A	A	B	B	A	B	B	A
*synopGBS1037	63.33	7D	TGCAGGTTTGTTGCTGTTATCACACTAGCCTATCCGCCGTTGACTCGCTGAAATTTGTGGCAA	A/C	0	13071	-1	62	3	92	87	11	0.898396	A	B	B	B	B	B	A	B	B	A	A	A	A	A	A	B	A	B	A	B	B	B	B	A	A	B	B	B	A	A	B	B	A	A	B	A
*synopGBS1038	63.33	7D	TGCAGGTTTGTTGCTGTTATCACACTAGCCTATCCGCCGTTGACTCGCTGAAATTTGTGGCAA	A/T	0	13072	-1	63	3	92	87	11	0.898396	A	B	B	B	B	B	A	B	B	A	A	A	A	A	A	B	A	B	A	B	B	B	B	A	A	B	B	B	A	A	B	B	A	A	B	A
*synopGBS930	63.33	7D	TGCAGGTACCTCAGTCGGCGCCCTGAGATTGCTTCCTCTCTTGCCCTCTCTCCATCTCACACG	C/T	0	12163	-1	9	3	92	89	8	0.925134	A	B	B	-	B	B	A	B	B	A	A	A	A	A	A	B	A	B	A	B	B	B	B	A	A	B	B	B	A	A	B	B	A	A	B	A
*synopGBS931	63.33	7D	TGCAGGTACCTCAGTCGGCGCCCTGAGATTGCTTCCTCTCTTGCCCTCTCTCCATCTCACACG	T/A	0	12164	-1	28	3	92	89	8	0.925134	A	B	B	-	B	B	A	B	B	A	A	A	A	A	A	B	A	B	A	B	B	B	B	A	A	B	B	B	A	A	B	B	A	A	B	A
*synopGBS761	73.44	7D	TGCAGGCAAGCATGGAGCCGCTCCTTAAGCCCTTCATTAAAGGTGCAAATTAACCCATGATCG	G/T	0	10474	-1	41	3	75	84	2	0.839572	A	B	B	-	B	B	B	B	B	A	A	A	A	A	A	B	A	B	A	B	B	B	B	A	A	A	B	B	A	B	B	B	A	A	B	A
*synopGBS437	78.29	7D	TGCAGCCCACTCTGCTCCGCACTACCGACTCACACGGAGTTAGAGCATTATGTGCCGCTCCGA	A/G	0	5670	-1	46	3	85	88	2	0.914439	A	B	B	A	B	B	B	B	B	A	A	A	A	A	A	B	A	B	B	B	B	B	B	A	A	A	B	B	A	B	B	B	A	A	B	A
*synopGBS584	79.94	7D	TGCAGCTCCTCCTCTGAAGACCGCAAATAGAAAACCATTCACAGAGGTAGGGGAGCCACACAA	A/G	0	8241	-1	28	3	76	82	4	0.823529	A	B	B	A	B	B	B	B	B	A	-	A	A	A	A	B	A	B	B	B	-	B	B	A	A	A	B	B	A	B	B	B	A	A	B	A
*synopGBS1180	81.65	7D	TGCAGTCCTACTACGCCGCCTCGCAGCAGTACCAGCAACACCACCACCAGCAGCAGCAGCAAC	C/G	0	14201	-1	46	3	90	78	3	0.882353	A	B	B	A	B	B	B	B	B	A	B	A	A	A	A	B	A	B	B	B	-	B	B	A	A	A	B	B	A	B	B	B	A	A	B	A
*synopGBS660	82.64	7D	TGCAGCTTTTGGCCACCATGTTAGTGCTAGTCTCAGCCAACATCGCATCGCCCAACTGCATCA	C/G	0	9436	-1	33	3	79	86	2	0.871658	A	B	B	A	B	B	B	B	B	A	B	A	A	A	A	B	A	B	B	B	A	B	B	A	A	A	B	B	A	B	B	B	A	A	B	A
*synopGBS259	84.32	7D	TGCAGATCTAACTACGTTGACTTATGCGTGCAGGCTTCAGTTCACGCCAGAGCTGAAGGCGAA	A/G	0	2761	-1	13	3	87	85	6	0.887701	A	B	B	A	B	B	B	B	B	A	B	A	A	A	A	B	A	B	B	B	A	B	B	A	A	A	B	B	A	B	B	B	A	A	B	A
*synopGBS287	84.32	7D	TGCAGATGGAAGTCGTGAATGGTAGGCCAAAATTGCAGGAATTGGGGAAAATGAGCTAGCGAG	A/G	0	3009	-1	47	3	86	71	7	0.802139	A	B	B	A	B	B	B	B	B	A	B	A	A	A	A	B	A	B	B	B	A	B	B	A	A	A	B	B	A	B	B	B	A	-	B	A
*synopGBS585	84.32	7D	TGCAGCTCCTCCTCTGAAGACCGCAAATAGAAAACCATTCACAGAGGTAGGGGAGCCACACAA	A/G	0	8242	-1	40	3	76	82	4	0.823529	A	B	B	A	B	B	B	B	B	A	B	A	A	A	A	B	A	B	B	B	A	B	B	A	A	A	B	B	A	B	B	B	A	-	B	A
*synopGBS251	85.17	7D	TGCAGATCGCGCTGTTCGTCGTCGTCTCCGCGGCGATCATGAGCAGCTCCGTCTGCCACGGAG	A/G	0	2721	-1	44	3	91	86	9	0.898396	A	B	B	A	B	B	B	B	B	A	B	A	A	A	A	B	A	B	B	B	A	B	B	A	A	A	B	B	A	B	B	B	A	-	B	A
*synopGBS1449	90.26	7D	TGCAGTTGGTGAATATAGTGTGGGTGACGTTGGGATCATCGACGAAGCGGGCATCGAAGCTTT	G/A	0	16185	-1	55	3	82	85	8	0.850267	A	B	B	B	B	B	B	B	B	A	B	A	A	A	A	B	A	B	B	B	A	B	B	A	A	B	B	A	A	B	B	B	A	-	B	A
*synopGBS622	90.26	7D	TGCAGCTTACAAAGATGAGAAAAACCGTGAAGTGCGCTAGTCACCAACTCCTTCCTCTCAGTT	C/T	0	9027	-1	43	2	71	84	2	0.818182	A	B	B	B	B	B	B	B	B	A	B	A	A	A	A	B	A	B	B	B	-	B	B	A	A	B	B	A	A	B	B	B	A	-	B	A
*synopGBS683	118.85	7D	TGCAGGAAGCGGCAAATAGGAAATTCCATAAATAACGTTCGCACAACCGATGCAGCGTGGCGG	G/T	0	9644	-1	5	3	76	94	4	0.887701	A	B	A	B	B	B	B	B	B	A	A	A	A	A	A	B	A	A	B	B	B	B	B	A	A	B	B	A	A	B	B	B	A	-	A	A
*synopGBS684	118.85	7D	TGCAGGAAGCGGCAAATAGGAAATTCCATAAATAACGTTCGCACAACCGATGCAGCGTGGCGG	A/G	0	9645	-1	13	3	76	94	4	0.887701	A	B	A	B	B	B	B	B	B	A	A	A	A	A	A	B	A	A	B	B	B	B	B	A	A	B	B	A	A	B	B	B	A	-	A	A
*synopGBS742	118.85	7D	TGCAGGATCCGTGTAGGGACGCCTGAGTTGATTCCCGATGTCTTCTCCGTGGACTCTTAGGAT	G/T	0	10305	-1	63	3	82	88	5	0.882353	A	B	A	B	B	B	B	B	B	A	A	A	A	A	A	B	A	A	B	B	B	B	B	A	A	B	B	A	A	B	B	B	A	B	A	A
*synopGBS390	119.62	7D	TGCAGCATGGCCGTACTGAACATCTGGGACACAAACCAGAGGGACCCGAACACTTTGGTAGCT	G/A	0	5004	-1	47	3	87	75	4	0.84492	A	B	A	B	B	B	B	B	B	A	A	A	A	A	A	B	A	A	B	B	B	B	B	A	A	B	B	A	A	B	B	B	A	B	A	A
*synopGBS391	119.62	7D	TGCAGCATGGCCGTACTGAACATCTGGGACACAAACCAGAGGTACCCAAACACTTTGGTAGCT	A/G	0	5005	-1	47	1	75	87	4	0.84492	A	B	A	B	B	B	B	B	B	A	A	A	A	A	A	B	A	A	B	B	B	B	B	A	A	B	B	A	A	B	B	B	A	B	A	A
*synopGBS7	119.62	7D	TGCAGAAAAAGATTGGGAATTCGTCATAGTAGAGGTTTGCCTGCTGCCAGTCCCAGACCCAGT	A/G	0	26	-1	25	3	94	79	7	0.887701	A	B	A	B	B	B	B	B	B	-	A	A	A	A	A	B	-	A	B	B	B	B	B	A	A	B	B	A	A	B	B	B	A	B	A	A
*synopGBS8	119.62	7D	TGCAGAAAAAGATTGGGAATTCGTCATAGTAGAGGTTTGCCTGCTGCCAGTCCCAGACCCAGT	T/G	0	27	-1	37	3	94	79	7	0.887701	A	B	A	B	B	B	B	B	B	-	A	A	A	A	A	B	-	A	B	B	B	B	B	A	A	B	B	A	A	B	B	B	A	B	A	A
*synopGBS176	122.88	7D	TGCAGAGAAGAAGATGGAGCACAGAAGGAGACGGCGAAGCGCAAGTCAATGAGCTCCAAGATG	C/G	0	1679	-1	21	3	91	75	6	0.855615	A	B	A	B	B	B	B	B	B	B	A	A	A	A	A	B	-	A	B	B	B	B	B	A	A	B	A	A	A	B	-	B	A	B	A	A
*synopGBS1106	131.59	7D	TGCAGTAGCAGGGCTCACATGCAAAGGGGAGTGAGTGCAATTTGAATTCGGAGCTAGCTGACT	A/G	0	13535	-1	16	3	96	75	4	0.893048	A	B	A	B	B	B	B	B	B	B	A	A	A	A	A	B	B	A	B	B	B	B	B	A	A	B	A	A	A	B	A	B	A	B	A	A
*synopGBS252	132.33	7D	TGCAGATCGGGAGCGAATTCAAAGCTGACGGAGATGCGACCAACCGCACTACCTGTGATGATC	C/G	0	2730	-1	19	3	77	90	6	0.860963	A	B	A	B	B	B	B	B	B	B	A	B	A	A	A	B	B	A	B	B	B	B	B	A	A	B	A	A	A	B	A	B	A	B	A	A
*synopGBS351	132.33	7D	TGCAGCACATCCTGGCCTTCGCGTCGGCCAAGGAGGCCGCGGCCAGCGCCGCCCTCTCGCGCC	C/T	0	3970	-1	7	3	82	86	4	0.877005	A	B	A	B	B	B	B	B	B	B	A	B	A	A	A	B	B	A	B	B	B	B	B	A	A	B	A	A	A	B	A	B	A	B	A	A
*synopGBS352	132.33	7D	TGCAGCACATCCTGGCCTTCGCGTCGGCCAAGGAGGCCGCGGCCAGCGCCGCCCTCTCGCGCC	A/C	0	3971	-1	8	3	82	86	4	0.877005	A	B	A	B	B	B	B	B	B	B	A	B	A	A	A	B	B	A	B	B	B	B	B	A	A	B	A	A	A	B	A	B	A	B	A	A
*synopGBS46	132.33	7D	TGCAGAACGCTCCTTCTAACGCGCATGCGATGGTCGTGTCCACGGAGATCTTGACTGGGGCCT	G/A	0	471	-1	37	3	102	84	5	0.967914	A	B	A	B	B	B	B	B	B	B	A	B	A	A	A	B	B	A	B	B	B	B	B	A	A	B	A	A	A	B	A	B	A	B	A	A
*synopGBS47	132.33	7D	TGCAGAACGCTCCTTCTAACGCGCATGCGCTGGTCGTATCCACGGAGATCTTGACTGGGGCCT	A/G	0	472	-1	37	1	84	96	5	0.935829	A	B	A	B	B	B	B	B	B	B	A	B	A	A	A	B	B	A	B	B	B	B	B	A	A	B	A	A	A	B	A	B	A	B	A	A
*synopGBS84	132.33	7D	TGCAGAATGTCGACGTTAACTTCCGCGGAGTTCGCGAGCCTTAGTGACAACACTACATTGCGC	C/T	0	865	-1	13	1	83	77	4	0.834225	A	B	A	B	B	B	B	B	B	B	A	B	A	A	A	B	B	A	B	B	B	B	B	A	A	B	A	A	A	B	A	B	A	B	A	A
*synopGBS1047	134.7	7D	TGCAGTAAAAGATGTGGGCCTTTCTTCCCACTTACTTATATCCGTCACCCGCTATAATAAATT	A/C	0	13119	-1	53	3	69	90	5	0.823529	A	B	A	B	B	B	B	B	B	B	-	B	A	A	A	B	B	A	B	B	-	B	B	A	A	-	A	A	A	B	A	B	A	B	A	A
*synopGBS1327	139.85	7D	TGCAGTGTAGTATAACTGGTTCTTGATCGGTGGCTTACCTTACATGGAGAGATGTAAGTTACC	A/T	0	15290	-1	13	3	75	83	3	0.828877	A	B	A	B	B	B	B	B	B	B	B	B	A	A	A	B	B	A	B	B	-	B	B	A	A	A	A	A	A	B	A	B	A	B	A	A
*synopGBS847	148.61	7D	TGCAGGCTGCGCGCTGCCACTGTTCCTTGCATCAGCCTCGAACTCGGCGCCACCCCCCGTGCT	C/T	0	11371	-1	54	1	79	84	8	0.828877	A	B	A	B	B	B	B	-	B	B	B	B	B	A	A	B	A	A	B	B	A	B	B	A	A	A	A	A	A	B	A	B	A	B	A	A
*synopGBS417	154.55	7D	TGCAGCCACGATTATCGAATCAGGCCCTTTATACGTCGGCGGACGCGGCCTATCAATTCTCAA	A/G	0	5341	-1	7	3	76	88	6	0.84492	A	B	A	B	B	B	B	A	B	B	B	B	B	A	A	B	A	A	B	-	A	A	B	A	A	A	A	A	A	B	A	B	A	B	A	A
*synopGBS1375	159.32	7D	TGCAGTTCAAATGTTTTTTGATACAGGTCAAATGCCCCAAGGCGTCAAAACCACCACCATCGT	A/C	0	15650	-1	48	3	77	80	4	0.818182	A	B	A	B	B	B	B	A	B	B	A	B	B	A	A	B	A	A	B	A	A	A	A	A	A	A	A	-	A	B	A	B	A	B	A	A
*synopGBS1381	162.07	7D	TGCAGTTCACTAAAATGGATCTGCCACCGCTCTTGGCAGAGCAAGATGGCCGTAATTGTGCTT	A/G	0	15688	-1	25	3	89	81	7	0.871658	A	B	A	B	B	B	B	A	B	B	A	B	B	A	A	B	A	A	B	A	A	A	A	A	A	A	A	B	A	B	A	B	A	B	A	A
*synopGBS530	162.07	7D	TGCAGCTACCAGATGACAGTCGCATGCACCCCGCCTTCCACGTTTCACAACTGAAGCCCTTCA	C/T	0	7754	-1	31	3	98	73	6	0.882353	A	B	A	B	B	B	B	A	B	B	A	B	B	A	A	B	A	A	B	A	A	A	A	A	A	A	A	B	A	B	A	B	A	B	A	A
*synopGBS531	162.07	7D	TGCAGCTACCAGATGACAGTCGCATGCACCCCGCCTTCCACGTTTCACAACTGAAGCCCTTCA	C/T	0	7755	-1	38	3	98	73	6	0.882353	A	B	A	B	B	B	B	A	B	B	A	B	B	A	A	B	A	A	B	A	A	A	A	A	A	A	A	B	A	B	A	B	A	B	A	A
*synopGBS1172	176.59	7D	TGCAGTCCACTCAGATAAAGATCCCTGAGCTGGCCAACGGGGCCCAACTCTTCCAAACTACAC	C/G	0	14066	-1	37	1	87	89	7	0.903743	A	B	A	B	B	B	B	A	B	B	A	B	B	B	B	B	A	A	A	A	B	A	A	A	A	A	A	B	A	A	A	B	-	B	A	A
*synopGBS800	176.59	7D	TGCAGGCCACTCAGATAAAGATCCCTGAGCTGGCCAAGGGGGCCCAACTCTTCCAAACTACAC	G/C	0	10753	-1	37	3	89	87	7	0.903743	A	B	A	B	B	B	B	A	B	B	A	B	B	B	B	B	A	A	A	A	B	A	A	A	A	A	A	B	A	A	A	B	-	B	A	A
*synopGBS694	189.15	7D	TGCAGGACAGAAGGGCGACGATGAACAAAGAAAAGATTCCCAACGTGAGGAGATCGAACCCTG	A/C	0	9780	-1	35	3	82	79	3	0.84492	A	B	A	B	B	B	A	A	B	-	A	B	B	B	B	B	A	A	A	A	B	A	A	A	A	A	B	-	A	A	A	B	B	B	A	A
*synopGBS1007	190.05	7D	TGCAGGTTCGCTGTCCGCGCACAACTATAGTGCCCACCGACTGCTTGCCAATACAGTTAAACA	A/G	0	12908	-1	62	1	82	73	5	0.802139	A	B	A	B	-	B	A	A	B	A	A	B	B	B	B	B	A	A	A	A	B	A	A	A	A	A	B	A	A	A	A	B	B	B	A	A
*synopGBS1469	191.93	7D	TGCAGTTTCCCGTTTGGGGCCAAGGAAAATGCCACGAAACAACAGAGAGATGCAGGCCCAGAG	C/T	0	16385	-1	9	3	76	82	5	0.818182	A	B	A	B	-	B	A	A	B	-	-	B	B	B	B	B	A	A	-	-	B	A	A	A	A	A	B	-	-	A	A	B	B	B	-	-
*synopGBS1350	193.72	7D	TGCAGTTACACTCCAGCTAAATCAGCAAGTTTACCATCTAACCAAACACCATCTTACCAGAGG	C/T	0	15484	-1	25	3	76	87	6	0.839572	A	B	A	B	B	B	A	A	-	A	-	-	-	B	B	B	A	A	A	A	B	A	A	A	A	-	B	A	-	A	A	-	B	B	-	A
[truncated: 128 more columns]

## Sheet: Ant_Map
marker	cm	chr	rs	alleles	chrom	pos	strand	assembly	center	protLSID	assayLSID	panelLSID	QCcode	M6	Opata	SynOpDH0001	SynOpDH0003	SynOpDH0005	SynOpDH0006	SynOpDH0007	SynOpDH0008	SynOpDH0009	SynOpDH0010	SynOpDH0011	SynOpDH0014	SynOpDH0015	SynOpDH0017	SynOpDH0018	SynOpDH0019	SynOpDH0020	SynOpDH0021	SynOpDH0022	SynOpDH0023	SynOpDH0024	SynOpDH0026	SynOpDH0028	SynOpDH0029	SynOpDH0030	SynOpDH0031	SynOpDH0033	SynOpDH0034	SynOpDH0035	SynOpDH0038	SynOpDH0040	SynOpDH0042	SynOpDH0045	SynOpDH0046	SynOpDH0047	SynOpDH0048
*synopGBS1256	0	1A	TGCAGTGAGCGCCGATTGTGTTTTGTGGTGCTAACAGCGCTGAATAAGAGCCCCCGTCAAGCA	C/G	0	14699	-1	34	3	73	82	2	0.818182	A	B	-	A	B	B	B	A	A	B	A	B	B	B	B	A	A	A	B	B	A	B	A	A	B	B	A	B	A	A	A	B	B	A	-	B
*synopGBS661	0	1A	TGCAGCTTTTGTGGAACTAGATGACCTGGCTGTGCCAATGGCGCAAGAAGCGAATTAGAAGCG	C/A	0	9441	-1	50	3	92	82	5	0.903743	A	B	A	-	B	B	B	A	-	B	-	B	-	B	B	A	A	A	B	B	A	B	A	A	B	B	A	B	A	A	-	B	B	A	A	B
*synopGBS662	0	1A	TGCAGCTTTTGTGGAACTAGATGACCTGGTTGTGCCAATGGCGCAAGAAGAGAATTAGAAGCG	A/C	0	9442	-1	50	1	82	92	5	0.903743	A	B	A	-	B	B	B	A	-	B	-	B	-	B	B	A	A	A	B	B	A	B	A	A	B	B	A	B	A	A	-	B	B	A	A	B
*synopGBS308	1.79	1A	TGCAGATTATCAAGGGCTTATTTCCACCGCAGCTTATGTAGAAGCCATGGCTCAAAAGAACTG	A/C	0	3190	-1	5	1	75	87	3	0.850267	A	B	-	A	B	B	B	A	-	B	-	B	B	B	-	-	A	A	B	-	-	B	A	A	B	B	A	B	A	-	-	-	-	A	A	B
*synopGBS774	1.79	1A	TGCAGGCACGTCTGCCTCACTGCTAGAAGACACTTGGACTAACTCTGCCATGCCCTGCTGCTT	C/T	0	10552	-1	30	3	72	82	4	0.802139	A	B	-	-	B	-	-	A	A	B	A	B	B	-	B	A	A	A	-	B	A	B	A	-	-	-	A	B	-	-	A	B	A	A	A	B
*synopGBS775	1.79	1A	TGCAGGCACGTCTGCCTCACTGCTAGAAGACACTTGGACTAACTCTGCCATGCCCTGCTGCTT	A/C	0	10553	-1	31	3	72	82	4	0.802139	A	B	-	-	B	-	-	A	A	B	A	B	B	-	B	A	A	A	-	B	A	B	A	-	-	-	A	B	-	-	A	B	A	A	A	B
*synopGBS776	1.79	1A	TGCAGGCACGTCTGCCTCACTGCTAGAAGACACTTGGACTAACTCTGCCATGCCCTGCTGCTT	A/G	0	10554	-1	37	3	72	82	4	0.802139	A	B	-	-	B	-	-	A	A	B	A	B	B	-	B	A	A	A	-	B	A	B	A	-	-	-	A	B	-	-	A	B	A	A	A	B
*synopGBS477	26.48	1A	TGCAGCCTCGCCTACAGTGTGTAGTCAACATCAGGTTTGGCTGCTTGTGCTCCTGTGCCACCC	C/T	0	6436	-1	8	3	85	84	7	0.86631	A	B	B	A	A	B	B	A	B	B	A	B	B	B	B	A	B	A	B	-	A	B	A	B	A	B	A	A	A	A	A	B	A	A	A	B
*synopGBS1031	27.99	1A	TGCAGGTTTCGTTCCGCAATCAAGTTTCTCTACCATCCCAGGTCGTTCTCTCAGCATACGGCG	A/G	0	13052	-1	17	3	81	98	8	0.914439	A	B	B	A	A	A	-	A	B	B	A	B	B	B	B	A	B	A	B	A	-	B	A	B	A	B	A	A	A	A	-	B	A	A	A	-
*synopGBS665	27.99	1A	TGCAGGAAAATACTCAATTGCACTGCGGCAGAGGGCCAGGCCCATTGCCTATGTGCGAGACGT	C/G	0	9468	-1	25	3	92	75	3	0.877005	A	B	B	-	A	-	B	A	B	B	A	B	B	B	B	A	B	A	B	A	A	B	A	B	A	B	A	A	A	A	A	B	A	A	A	-
*synopGBS125	53.14	1A	TGCAGACCCGTGCGGAATCGTCCCAGCGCACGCACGCGCCTCTTGCCTGTCGGTCGAGTCGGT	A/T	0	1236	-1	56	3	96	64	7	0.818182	A	B	-	-	-	-	A	A	B	B	B	B	B	B	-	-	-	A	-	A	-	B	A	B	A	B	A	A	B	A	A	-	A	-	A	B
*synopGBS210	54.01	1A	TGCAGATAGCATGACTAGCTAGGGTCAGAATAGTTGCCCATGTCTTCCAAATCCCCTGTAGAT	A/G	0	2393	-1	7	2	75	105	11	0.903743	A	B	B	A	B	A	A	A	B	A	B	B	B	B	B	A	B	A	B	A	B	B	A	B	A	B	A	-	-	A	A	B	A	A	-	B
*synopGBS105	55.56	1A	TGCAGACACCCTTACAGCACAAGACGTCTCCTTCCTCGACCAATCCATACACGGCAGCTCACC	G/T	0	1029	-1	53	2	78	110	12	0.941176	A	B	B	A	B	A	A	A	B	A	B	B	B	B	B	A	B	A	B	A	B	B	A	B	A	B	A	A	B	A	A	B	A	-	A	B
*synopGBS510	64.67	1A	TGCAGCGCGTTCTCCTTGTCCATCAGGTTCGCCTTGAGCTCCGCGATGTCTGTGATCGACTTC	A/C	0	7199	-1	54	3	103	79	10	0.919786	A	B	B	-	B	A	A	A	B	A	B	B	B	B	B	A	B	A	B	A	B	B	A	B	A	B	A	-	B	A	A	B	A	A	A	B
*synopGBS1355	66.13	1A	TGCAGTTACTGCCTTGGAGCATCGCGACGACACGAACATCGCCCAACCATCCAAGCCCTGGAC	C/T	0	15525	-1	27	1	75	104	7	0.919786	A	B	B	-	B	A	-	A	B	A	B	B	B	B	B	A	B	A	B	A	B	B	A	B	-	B	A	A	-	A	-	B	A	A	A	B
*synopGBS854	68.29	1A	TGCAGGCTTCAGAGGACGCAGCACGGCCGAGGGCGGCAAGGAATCCTTCAAGGGAGCGCTCGG	C/T	0	11417	-1	16	1	105	79	10	0.930481	A	B	B	A	B	A	A	A	-	-	B	B	B	B	B	A	B	A	B	A	-	B	A	B	A	B	A	A	B	A	A	B	A	-	A	B
*synopGBS1486	77.66	1A	TGCAGTTTTCCGATCGGATATGTCAGCGGCGTCGAGGACCATGCATGGATCGGTTAAAGGTGA	A/T	0	16575	-1	57	2	87	79	14	0.812834	-	B	-	-	B	A	-	A	B	-	-	B	-	B	B	-	B	-	B	A	-	B	-	B	A	B	A	-	B	B	-	B	-	A	-	B
*synopGBS1200	78.56	1A	TGCAGTCGGGCCTGAACCTCCATGGCGCGCCGCCCCAAGCTCCGCCACCAGTCGCCTCAACCT	C/T	0	14359	-1	39	3	99	78	7	0.909091	A	B	B	A	B	A	A	-	B	A	B	B	B	B	B	A	B	A	B	-	B	B	A	B	A	B	A	A	B	B	-	B	A	-	B	B
*synopGBS387	78.56	1A	TGCAGCATCTTTTTGGTGAGACGCAGGCGGCCAGAACATCCGCCAATTATTTGGCATTCCCCG	A/G	0	4937	-1	37	3	72	82	3	0.807487	A	B	B	-	B	A	-	A	B	A	B	B	B	B	B	A	B	A	B	A	B	B	A	-	A	B	A	A	B	B	-	B	A	-	B	B
*synopGBS1313	80.36	1A	TGCAGTGGAGACGCACAAGGCGAAGAAGGCTTCGGACACGCCAAAGACTCATGAGGGCGCCCC	G/T	0	15085	-1	58	2	81	81	7	0.828877	A	B	A	A	B	-	-	-	-	A	B	B	-	B	B	A	B	-	B	-	-	B	A	B	A	B	A	-	B	B	A	B	-	-	B	B
*synopGBS1081	83.04	1A	TGCAGTACGCTTGAAGCGACACACGCAGTGTGATTTGGACTCGCGTTGGCTGAGCGGTCGTTG	A/G	0	13382	-1	20	3	85	72	7	0.802139	A	B	A	A	B	-	A	-	-	A	B	B	A	-	B	A	B	A	B	A	B	B	A	B	A	-	A	A	-	-	-	-	A	A	B	B
*synopGBS455	83.04	1A	TGCAGCCGAAAAAACTGATCTCATATTCGGATTCGGCAGATCATGTTGCCTCGGCGACGCATA	C/T	0	5967	-1	41	3	99	65	11	0.818182	A	B	A	A	B	A	-	A	B	A	B	B	A	-	B	A	B	A	B	-	-	B	A	B	A	B	-	A	-	B	A	B	A	A	B	B
*synopGBS74	83.04	1A	TGCAGAATGAATAGATATACACCCACCACCAACCCCAAGCCCACCGTACCCTTCTTCCATAGT	C/G	0	815	-1	44	3	87	71	8	0.802139	A	B	-	A	B	A	-	-	-	A	B	B	A	B	B	-	B	A	B	-	B	B	A	B	A	B	A	A	B	B	A	B	A	A	B	B
*synopGBS1107	83.97	1A	TGCAGTAGCATGGATAGGGCGAGGCGCAACTTGATGGCGTGTGTTGACTCGCTCCACTGCCGA	T/C	0	13543	-1	31	3	79	82	4	0.839572	A	B	A	-	B	A	A	A	B	A	B	B	A	B	B	A	B	A	B	A	B	B	A	B	A	B	A	A	B	-	A	-	-	A	-	B
*synopGBS1108	83.97	1A	TGCAGTAGCATGGATAGGTCGAGGCGCAACTCGATGGCGTGTGTTGACTCGCTCCACTGCCGA	C/T	0	13544	-1	31	1	82	79	4	0.839572	A	B	A	-	B	A	A	A	B	A	B	B	A	B	B	A	B	A	B	A	B	B	A	B	A	B	A	A	B	-	A	-	-	A	-	B
*synopGBS1321	83.97	1A	TGCAGTGGTCTCGCTCCCAGATTACTCAAACCTGAGCCTAAGTAGGCCGCTGTTGCGCTAGCT	G/T	0	15223	-1	19	3	77	80	7	0.802139	A	B	A	-	B	A	-	A	B	A	B	-	A	B	-	A	B	A	B	-	B	B	A	-	-	-	-	-	B	-	A	-	A	-	-	B
*synopGBS191	85.74	1A	TGCAGAGCATAGTTTTAAATAGTGAGCTATGCTAATTAGCGGCACACTGCTCAAACTGGTATA	A/G	0	1884	-1	28	3	86	78	7	0.839572	A	B	A	A	B	A	-	-	-	A	B	-	A	-	B	A	B	A	B	-	B	B	A	B	A	-	A	A	B	-	A	B	A	A	-	B
*synopGBS246	86.58	1A	TGCAGATCGATACCGTGTTGCTCCTGCTTGTTAAATGGCGCAGCGAACTTGATTCGGGATCCC	A/G	0	2704	-1	33	3	91	91	15	0.893048	A	B	A	A	B	-	A	A	B	A	-	B	A	B	B	A	B	A	B	A	B	B	A	B	A	-	-	A	B	B	-	B	A	A	B	B
*synopGBS1113	88.22	1A	TGCAGTAGCGTGGCGACGCGTTGGGAAGAGGCGCACATTCATCACGTTACGCGTTCAGTGCAC	C/T	0	13575	-1	63	1	85	91	9	0.893048	A	B	A	-	B	A	A	A	-	A	B	-	A	B	A	A	B	A	B	A	B	B	A	B	A	A	A	A	B	-	-	B	A	A	B	B
*synopGBS547	88.22	1A	TGCAGCTAGCTCTACGACGGACCAAACGTTGCCTCCACCCACCAGCCGCATTACCTGACGGCG	A/G	0	7867	-1	25	3	82	94	9	0.893048	A	B	A	A	B	-	A	A	-	A	B	B	A	-	A	A	B	A	-	A	B	B	A	B	A	A	A	A	B	B	-	B	A	A	-	B
*synopGBS372	89.02	1A	TGCAGCAGCTGCTCCTGAGAGCTCACACGGTCGTCGAGGAGGCGGATGGGCGATACATCACCA	A/T	0	4584	-1	6	1	74	90	6	0.84492	A	B	A	A	B	A	A	A	B	A	B	B	A	B	A	A	B	A	B	A	B	B	A	B	A	A	-	A	B	B	-	-	A	A	B	B
*synopGBS1010	95.32	1A	TGCAGGTTGACCATACCGCAGCAATGCCCAACTGGCTACAAGCTACAAAAATGACTACGGTAG	C/G	0	12939	-1	11	3	93	73	8	0.84492	A	B	A	A	B	A	B	A	B	A	B	B	A	-	A	A	B	A	B	-	B	B	A	A	A	A	A	A	-	-	A	B	A	A	B	-
*synopGBS940	96.19	1A	TGCAGGTAGGCTTCCAATCCTGAAGTTACATTTGCTCTGCTCAGTACTCGTGCATTTCTGCTC	A/G	0	12227	-1	45	3	87	78	9	0.834225	A	B	A	A	-	-	-	A	B	-	B	B	A	B	A	A	B	A	B	A	-	B	A	A	A	A	A	A	-	B	A	B	A	A	-	B
*synopGBS1451	101.65	1A	TGCAGTTGGTGTCGGTGCATGTGGCAATGGGTCAGCATCAGAAACTGTGCCCATGGAGGCGAA	C/T	0	16192	-1	12	3	83	89	10	0.86631	A	B	-	A	A	A	B	B	B	A	-	B	A	B	A	A	B	A	A	-	-	A	A	A	A	-	A	A	B	B	-	B	A	A	B	B
*synopGBS1452	101.65	1A	TGCAGTTGGTGTCGGTGCATGTGGCAATGGGTCAGCATCAGAAACTGTGCCCATGGAGGCGAA	T/C	0	16193	-1	27	3	83	89	10	0.86631	A	B	-	A	A	A	B	B	B	A	-	B	A	B	A	A	B	A	A	-	-	A	A	A	A	-	A	A	B	B	-	B	A	A	B	B
*synopGBS234	101.65	1A	TGCAGATCCTCCCCAGCAGCGCCGTGCGCCAGTTCTACGTCAGCATCAACGGCATGGAGTTGA	C/T	0	2655	-1	37	2	78	84	4	0.84492	A	B	-	A	-	A	B	B	B	A	B	B	A	-	A	A	B	A	A	A	A	A	A	-	A	A	A	A	B	B	A	B	-	A	B	B
*synopGBS988	107.49	1A	TGCAGGTTACCTTTGAGAGCATTATCATCCGAAAAAGCCTTTTACGTTCGCGTTCCATGCACA	G/A	0	12818	-1	63	3	92	85	10	0.893048	A	B	A	A	A	B	B	B	B	A	B	B	A	B	A	A	A	A	A	B	A	A	B	A	-	-	A	A	B	B	A	B	A	-	B	B
*synopGBS989	107.49	1A	TGCAGGTTACCTTTGAGAGCATTATCATCCGAAAAAGTCTTTTACGTTCGCGTTCCATGCACA	A/G	0	12819	-1	63	1	85	92	10	0.893048	A	B	A	A	A	B	B	B	B	A	B	B	A	B	A	A	A	A	A	B	A	A	B	A	-	-	A	A	B	B	A	B	A	-	B	B
*synopGBS456	121	1A	TGCAGCCGAAGCGCCGTGCCGTGAGCTTCGGATACAATCTCAAGAGCTACTCCCACAACTTCG	A/G	0	5980	-1	35	1	76	77	3	0.802139	A	B	A	A	A	-	-	-	-	A	B	B	A	-	B	B	A	A	-	B	A	A	-	-	A	A	A	A	B	A	-	B	A	-	-	B
*synopGBS263	153.51	1A	TGCAGATCTCTGTCCCAACACCGAGTCTGCATCATACATATTCACATCTGATAGCCCATAAGA	G/T	0	2788	-1	11	3	78	84	12	0.802139	A	B	-	A	A	B	A	B	-	A	B	B	A	A	A	-	A	-	-	B	-	A	-	A	A	B	A	A	-	B	B	B	-	-	-	-
*synopGBS1151	156.58	1A	TGCAGTCAATCGTCATTCAATTAAACTACTCCTTCTGTCCGACTAGCACGCGCTCTGGCGACT	T/C	0	13881	-1	32	3	82	93	6	0.903743	A	B	A	A	A	-	A	B	B	A	B	B	-	A	A	B	B	A	B	B	-	A	A	A	A	B	A	A	B	B	B	A	A	A	B	B
*synopGBS1275	156.58	1A	TGCAGTGCAGTACAGTAGTGAGTAGTTCATTGCTGCCCTTCAGAAGATCGGCCACGGCAGAGG	C/T	0	14845	-1	51	3	84	86	8	0.86631	A	B	A	A	A	B	A	B	-	A	B	B	A	A	A	B	B	-	B	-	B	A	A	A	-	B	A	A	B	-	B	A	A	A	B	-
*synopGBS376	156.58	1A	TGCAGCATAAGCTTGGGCTAACTGATAAACTAAACTCGATTGACAATCTGTCTTCGACGGCTC	C/T	0	4793	-1	34	3	76	81	7	0.802139	A	B	A	-	A	B	-	-	-	A	B	B	-	A	A	B	B	A	-	-	B	-	A	A	A	B	A	A	B	B	B	A	-	A	B	B
*synopGBS1443	164.59	1A	TGCAGTTGCTGTCATTCGAGATGGCAGCGCGACGCTGAAGATTGACACCCAACACCTGAGGGA	A/G	0	16118	-1	51	1	75	84	9	0.802139	A	B	A	-	A	-	-	B	-	A	-	-	A	A	A	B	B	A	B	-	-	-	A	A	A	B	B	A	-	A	-	A	A	A	-	-
*synopGBS942	164.59	1A	TGCAGGTAGTTGGGCAGCGGCGAACGCGGGCTGGGCGGGCCACCACATGGACGTCAAGTCCGC	C/T	0	12253	-1	26	3	95	72	10	0.839572	A	B	A	-	-	B	A	-	-	A	-	B	B	A	A	B	B	A	B	-	-	-	A	A	A	B	B	A	B	A	B	A	A	-	-	B
*synopGBS976	164.59	1A	TGCAGGTCTGGCAGGAGCAACGGTAAGGCCAGCAGTGTCGGGAGTCACGTCGGAGCTGCCTTC	A/G	0	12517	-1	12	3	76	88	4	0.855615	A	B	A	-	-	B	A	B	-	A	B	B	-	A	A	B	B	A	B	B	B	A	A	A	A	B	B	A	B	A	B	A	A	A	B	B
*synopGBS977	164.59	1A	TGCAGGTCTGGCAGGAGCAACGGTAAGGCCAGCAGTGTCGGGAGTCACGTCGGAGCTGCCTTC	T/C	0	12518	-1	35	3	76	88	4	0.855615	A	B	A	-	-	B	A	B	-	A	B	B	-	A	A	B	B	A	B	B	B	A	A	A	A	B	B	A	B	A	B	A	A	A	B	B
*synopGBS1344	165.46	1A	TGCAGTGTTCATCTGCCCCTTTTCGGAGATAACCTGTGTTCCAACAGCCAGTGATGTTTTGGG	A/G	0	15417	-1	43	3	91	81	7	0.882353	A	B	A	-	A	B	A	B	B	A	-	B	A	A	A	B	B	A	B	-	B	A	A	A	A	B	B	A	B	-	B	A	A	A	B	B
*synopGBS402	167.81	1A	TGCAGCATTTGTGTAGTTAGTTAGTTAGGGCATCTTTAAGGCGGATCCGTAAACCCCCCGCAA	C/T	0	5114	-1	55	3	97	79	9	0.893048	A	B	A	A	A	B	A	B	B	B	B	B	A	A	A	B	B	A	B	-	B	A	A	A	A	B	B	A	B	A	B	-	A	-	B	-
*synopGBS899	170.12	1A	TGCAGGGGATGCCGCTCCACAGACAACAGTCATGGTGTCGTTGCTGCCATGATGCGAGGCGAT	G/A	0	11858	-1	13	3	107	79	12	0.930481	A	B	A	-	A	B	A	B	B	B	B	A	A	A	A	B	B	A	B	B	B	A	A	A	A	B	B	A	B	A	B	A	A	A	B	B
*synopGBS982	170.12	1A	TGCAGGTGATGCCACTCCACAGACAACAGTCATGGTGTCGTTGCTGCCATGATGCGAGGCGAT	A/G	0	12585	-1	13	1	79	102	7	0.930481	A	B	A	-	A	B	A	B	B	B	B	A	A	A	A	B	B	A	B	B	B	A	A	A	A	B	B	A	B	A	B	A	A	A	B	B
*synopGBS1442	1.96	1B	TGCAGTTGCTCTAGATCGAGAATTGTTGGGACCTGCGGCGTAGGGGGACTGCTTGGGGTCGAG	A/G	0	16102	-1	30	3	76	83	8	0.807487	A	B	B	B	A	A	A	A	A	B	A	-	-	A	-	A	A	-	-	-	A	-	A	-	B	-	A	B	-	B	B	A	A	A	B	A
*synopGBS1489	1.96	1B	TGCAGTTTTTCGAGATTTTTAGTCAAACTCAATGTGCTTAGTTTGCAGTGTAGTAGTAGGAAG	C/G	0	16647	-1	29	3	67	92	5	0.823529	A	B	B	B	-	A	A	A	A	B	A	-	A	A	B	A	A	B	B	B	-	B	A	B	B	B	-	-	B	-	-	A	A	A	-	-
*synopGBS691	2.93	1B	TGCAGGAATCTACGCTTGAGCTCCATCTAGTTCGTCCCAGCAGACGAACTTGAGGGGGATCGG	C/T	0	9713	-1	12	3	73	88	11	0.802139	A	B	B	B	A	A	-	A	-	B	-	-	-	A	B	A	A	B	-	-	A	B	A	B	-	B	A	B	B	B	B	-	A	A	-	A
*synopGBS1366	8.94	1B	TGCAGTTATAGCCAGGCCCATTGGTGGAGTCGAGGCAGTCGCTGTGATCACTGACACAGGCGG	A/G	0	15577	-1	7	3	69	91	4	0.834225	A	B	-	B	A	A	A	A	-	B	-	B	A	A	B	A	A	B	B	-	A	B	A	B	B	B	A	B	-	B	A	A	-	-	B	A
*synopGBS1378	13.75	1B	TGCAGTTCAAGTCCGTGACGCATAATGCCTATGTGGCTGCCGAGCAGGGGGGCGGCGGCGCCC	C/T	0	15668	-1	7	3	76	95	13	0.84492	A	B	B	-	A	B	-	-	A	B	A	B	-	-	B	B	A	B	B	B	A	B	A	B	B	B	A	-	-	B	-	A	A	-	-	A
*synopGBS260	16.72	1B	TGCAGATCTCAACGCAGTCAGCACACAACTGTGCTCCAGATTTTCACATGCTAAATCCAGATA	A/T	0	2774	-1	10	3	109	64	14	0.850267	A	B	B	B	-	B	A	A	A	B	A	B	-	-	B	A	A	B	B	B	-	B	A	B	-	B	A	B	B	B	B	A	A	A	A	A
*synopGBS375	26.86	1B	TGCAGCAGGTCATCGGGGAGATTACGACAATCGTTGGTTCTGTGGAGGCAGACTAACATAATT	C/T	0	4697	-1	27	3	110	48	8	0.802139	A	B	B	B	B	B	-	-	-	B	B	B	-	A	B	B	A	B	B	B	A	B	A	B	B	B	A	B	B	B	B	A	A	B	-	A
*synopGBS1417	35.21	1B	TGCAGTTGAGGAAGAACCAGCAAATGAATATCACATCCGAGAAAAGGAAGAACTACCAGCAAC	A/C	0	15992	-1	22	3	86	75	2	0.850267	A	B	B	B	A	-	A	A	-	B	-	B	A	A	B	B	A	-	B	B	A	-	A	-	B	B	A	-	B	B	A	A	A	-	A	A
*synopGBS1467	35.21	1B	TGCAGTTTCAGGCTACTTCTTCGAAATCAGTAGGGGATGCTCGAAGAACCCATCCTCCGTGAG	G/C	0	16372	-1	32	1	71	100	6	0.882353	A	B	B	B	A	B	A	A	-	B	A	B	A	-	B	B	A	B	B	B	A	B	A	B	B	B	A	B	B	B	A	-	-	B	A	A
*synopGBS267	37.42	1B	TGCAGATCTTCAGGCATTGGTTCTCCATTTGACGCCGCCACTTCCTCGGCCACTCCTAGAGCC	A/G	0	2815	-1	31	3	95	83	8	0.909091	A	B	B	-	A	B	A	A	A	B	A	B	A	A	B	B	A	B	B	B	A	B	A	B	B	B	A	B	B	B	A	A	A	B	A	A
*synopGBS1430	40.67	1B	TGCAGTTGCACCCGTGCCTTCTGGAGCCACTAGCACGTTGCGACTCCAGAGGCGCTGCTGATA	C/G	0	16031	-1	16	3	78	83	7	0.823529	A	B	B	B	A	-	-	-	A	B	-	B	A	A	-	-	A	B	B	B	-	-	A	B	B	-	A	B	B	B	A	B	A	B	-	A
*synopGBS961	44.41	1B	TGCAGGTCCCACGGCGTGAGGTGCACCGTCTCAGTCGACTTTGGTTTCGTCGCCGTCGTCTCC	C/G	0	12387	-1	35	3	71	90	5	0.834225	A	B	B	B	A	B	A	A	-	B	A	B	A	-	B	-	B	B	B	B	A	A	A	-	B	B	A	B	-	B	A	B	A	-	A	A
*synopGBS962	44.41	1B	TGCAGGTCCCACGGCGTGAGGTGCACCGTCTCAGTCGACTTTGGTTTCGTCGCCGTCGTCTCC	C/T	0	12388	-1	52	3	71	90	5	0.834225	A	B	B	B	A	B	A	A	-	B	A	B	A	-	B	-	B	B	B	B	A	A	A	-	B	B	A	B	-	B	A	B	A	-	A	A
*synopGBS1201	56.07	1B	TGCAGTCGGTGGCGAGGCCCTAAGCTTCACGGGGATGGCGTACGTGTATGAAGCCGAAATCAC	C/T	0	14365	-1	12	3	98	62	8	0.812834	A	B	B	B	-	B	-	-	-	B	-	A	A	B	B	B	B	B	B	B	-	A	-	A	B	A	A	B	B	B	A	-	-	B	-	A
*synopGBS19	58.8	1B	TGCAGAAAGCAAAGCTGCCTCTGCATCTGCGTACAACGCTAGATCCATCTTAACTCGCGGGAA	C/T	0	189	-1	9	3	85	90	9	0.887701	A	B	B	-	A	B	A	A	A	B	A	A	A	B	B	B	B	B	B	B	-	A	A	A	B	A	A	-	B	-	-	B	A	B	A	A
*synopGBS56	59.6	1B	TGCAGAAGCGTTGAATCGATTCCTTGGTGCGCGGCGATTGCCGAGGGGAGCGAGATGGCACGG	C/T	0	628	-1	58	1	95	85	10	0.909091	A	B	B	B	A	B	-	-	-	B	A	A	A	B	B	-	B	B	B	B	A	A	A	A	B	-	A	B	B	B	-	B	A	-	A	A
*synopGBS188	60.45	1B	TGCAGAGCAAGTTCAGGAAAGCTGCCAGGAAGAGCAGGCAAGAGTTCGACGCCATTGATGGAA	A/G	0	1846	-1	40	2	79	83	4	0.84492	A	B	B	-	A	B	A	A	A	B	A	A	-	-	B	B	B	-	B	B	A	A	A	-	B	A	A	B	B	B	A	-	A	B	-	A
*synopGBS189	60.45	1B	TGCAGAGCAAGTTCAGGAAAGCTGCCAGGAAGAGCAGGCAAGAGTTCGACGCCATTGATGGAA	G/A	0	1847	-1	43	2	79	83	4	0.84492	A	B	B	-	A	B	A	A	A	B	A	A	-	-	B	B	B	-	B	B	A	A	A	-	B	A	A	B	B	B	A	-	A	B	-	A
*synopGBS222	60.45	1B	TGCAGATCAGAACAGATATAGCTCGAGGGAAACTAGTGAACTGAACGTTGGCATTTATTAAAA	G/A	0	2517	-1	50	3	82	73	5	0.802139	A	B	-	B	A	B	-	A	A	B	A	-	A	-	B	B	B	B	B	-	A	A	-	A	-	A	A	B	-	B	A	B	A	B	-	A
*synopGBS223	60.45	1B	TGCAGATCAGAACAGATATAGCTCGAGTGAAACTAGTGAACTGAACGTTGACATTTATTAAAA	A/G	0	2518	-1	50	1	73	82	5	0.802139	A	B	-	B	A	B	-	A	A	B	A	-	A	-	B	B	B	B	B	-	A	A	-	A	-	A	A	B	-	B	A	B	A	B	-	A
*synopGBS320	60.45	1B	TGCAGATTGCATGCATGGCCCTCTGTAGAGTAGAGTGGAAGTGCAGATTGCACGCCGATGCTC	G/C	0	3290	-1	32	3	77	80	5	0.812834	A	B	B	-	-	B	A	A	A	B	A	A	A	B	B	-	B	-	B	-	A	A	A	A	-	A	-	B	B	-	-	B	A	-	-	A
*synopGBS321	60.45	1B	TGCAGATTGCATGCATGGCCCTCTGTAGAGTAGAGTGGAAGTGCAGATTGCACGCCGATGCTC	G/A	0	3291	-1	40	3	77	80	5	0.812834	A	B	B	-	-	B	A	A	A	B	A	A	A	B	B	-	B	-	B	-	A	A	A	A	-	A	-	B	B	-	-	B	A	-	-	A
*synopGBS408	62.22	1B	TGCAGCCAACCCCTGCTACTCCCATGTCCCACCAACCTCGCGCCTCGACCTAGCTAAGCCCCC	C/G	0	5158	-1	48	3	81	75	5	0.807487	-	B	-	-	A	B	A	A	A	B	A	A	-	B	-	-	B	B	B	B	A	A	A	A	B	A	A	-	B	B	-	B	A	-	A	A
*synopGBS434	63.12	1B	TGCAGCCATCCGCTCTGTGTATAAGCCATAACAAAGAAACTGAGCATACTCCTACCCTAGTCT	C/T	0	5530	-1	10	1	71	84	5	0.802139	A	B	-	B	A	-	A	A	A	B	A	A	-	B	B	B	B	B	B	-	A	A	A	A	B	A	A	-	B	B	A	B	A	-	A	A
*synopGBS664	64.04	1B	TGCAGGAAAACACCTTCAGGCAAGCCATAGCAGAGAAGCGGAGGCGCAGGGCGAGCCGTAGCC	A/G	0	9462	-1	47	3	76	86	3	0.850267	A	B	B	B	A	B	-	A	A	B	A	-	A	B	B	B	B	B	B	-	A	A	A	A	B	A	A	B	B	B	A	-	A	B	A	A
*synopGBS688	64.89	1B	TGCAGGAAGTACCGAAACAGTACGAGCGCTTGCCGCGGGCGATGCAGGGGAACCTCATGGCCG	A/G	0	9675	-1	41	3	81	81	3	0.850267	A	B	B	B	A	B	A	A	A	B	A	A	A	B	B	B	B	B	B	B	A	A	A	A	B	A	A	B	B	B	A	B	A	B	-	A
*synopGBS828	64.89	1B	TGCAGGCGTGAAGAAAATTTAAGGACGGTATAAGTGCACCTAAACAAAGCTCTCACAGCGATT	C/T	0	11232	-1	53	3	91	73	3	0.860963	A	B	B	B	A	B	A	A	A	B	A	A	A	B	B	B	B	B	B	B	A	A	A	A	B	A	A	B	B	-	A	B	A	-	A	A
*synopGBS967	64.89	1B	TGCAGGTCGAGGCCATGCCACGCCCTCTCATCGCCGTCGCGGCTGAGCCAAAGCCAGGGCGTG	A/G	0	12437	-1	14	3	86	76	3	0.850267	A	B	B	B	A	-	A	-	A	B	A	A	A	B	B	B	B	B	B	-	A	A	A	A	-	A	A	-	B	B	-	B	A	B	A	-
*synopGBS1149	65.75	1B	TGCAGTCAATAATCCCATACTCACCTCGCTTGGCAGAAGAGAGACTTTCTTCCAGGGATAAAC	C/T	0	13879	-1	62	3	75	80	2	0.818182	A	B	B	-	A	-	A	A	A	B	-	A	A	-	B	B	B	B	B	B	-	A	-	A	B	A	A	B	B	B	A	B	A	-	A	A
*synopGBS1150	65.75	1B	TGCAGTCAATAATCCCATACTCACCTCGCTTGGCAGAAGAGAGACTTTCTTCCAGGGATAAAC	G/A	0	13880	-1	63	3	75	80	2	0.818182	A	B	B	-	A	-	A	A	A	B	-	A	A	-	B	B	B	B	B	B	-	A	-	A	B	A	A	B	B	B	A	B	A	-	A	A
*synopGBS1210	66.56	1B	TGCAGTCGTTTGGTTCAGAAGCTTTCAGGTGCTCTAGTCTTGACGTTTCTCGAAATTGGCGGG	G/T	0	14421	-1	58	3	85	96	10	0.914439	A	B	B	B	A	B	A	A	A	B	A	A	A	B	B	B	B	B	B	B	A	-	A	A	B	A	A	B	B	B	A	B	A	B	-	A
*synopGBS1238	66.56	1B	TGCAGTGAAACACGGAAAATATCTCGATAGCTCTAGGCGGAAACTCACCGCCCCCCGCCATGC	C/G	0	14592	-1	62	3	89	80	6	0.871658	A	B	B	-	A	B	A	-	A	B	A	A	A	B	B	B	B	-	B	B	A	A	A	-	B	A	A	B	B	B	A	-	A	B	A	A
*synopGBS1335	66.56	1B	TGCAGTGTGAGCTGCCCCAACAAGAGACACCGCAACATGCCATACCAATAACTCAGGCCCTTA	C/T	0	15353	-1	16	3	92	80	6	0.887701	A	B	B	-	A	B	A	A	-	B	A	A	-	B	B	B	B	-	B	B	A	A	A	A	B	A	A	B	B	B	-	B	A	B	-	A
*synopGBS1395	66.56	1B	TGCAGTTCCGTCGTTCTACGAGCCACCTCGTTGGGGTGATGGATACCGATTCTTTGATCCCTC	C/G	0	15800	-1	25	3	90	83	5	0.898396	A	B	B	B	A	B	A	A	A	B	A	A	A	B	B	B	B	B	B	B	A	A	A	-	B	A	A	B	B	B	A	B	A	B	A	-
*synopGBS1396	66.56	1B	TGCAGTTCCGTCGTTCTACGAGCCACCTCGTTGGGGTGATGGATACCGATTCTTTGATCCCTC	G/A	0	15801	-1	35	3	90	83	5	0.898396	A	B	B	B	A	B	A	A	A	B	A	A	A	B	B	B	B	B	B	B	A	A	A	-	B	A	A	B	B	B	A	B	A	B	A	-
*synopGBS1397	66.56	1B	TGCAGTTCCGTCGTTCTACGAGCCACCTCGTTGGGGTGATGGATACCGATTCTTTGATCCCTC	C/T	0	15802	-1	62	3	90	83	5	0.898396	A	B	B	B	A	B	A	A	A	B	A	A	A	B	B	B	B	B	B	B	A	A	A	-	B	A	A	B	B	B	A	B	A	B	A	-
*synopGBS1407	68.26	1B	TGCAGTTCGGGGGACACACGCACCTGATACAGAAGAGTGCAATTGCCATCCCAAATGCGAGTA	G/T	0	15868	-1	25	3	75	84	7	0.812834	A	B	-	B	A	-	-	A	-	-	-	A	A	B	B	B	B	B	B	-	A	A	A	A	B	A	-	-	B	B	A	B	-	B	-	A
*synopGBS1409	68.26	1B	TGCAGTTCTCCAAGCAGGGGCTGATGCTTCCCCACGTGTTGGCAGCATTGAACCGATGCGTCG	C/T	0	15904	-1	58	3	91	92	6	0.946524	A	B	B	B	A	-	A	A	A	B	A	A	A	B	B	B	B	B	B	-	A	A	A	A	B	A	A	B	B	B	A	B	A	B	A	A
*synopGBS1103	69.05	1B	TGCAGTAGATTCTTACCAAGCCGAGCGAGCTGTTTCGTGTAAAATCCTCGCGTCCATCACCAG	A/G	0	13519	-1	55	3	89	75	7	0.839572	A	B	B	B	A	-	-	-	-	-	A	A	-	B	B	B	B	B	-	-	A	-	A	A	B	A	A	B	B	-	A	B	-	B	-	A
*synopGBS282	69.88	1B	TGCAGATGCCACAACATGGGGAGGCGGGATGCTGTACCACTGGAGATACCAAGAGAGGAGCAC	A/C	0	2947	-1	63	3	97	78	9	0.887701	A	B	B	B	A	B	-	A	A	B	A	A	A	B	B	B	B	B	B	B	-	-	A	-	B	A	A	B	B	B	A	B	-	B	A	A
*synopGBS486	72.43	1B	TGCAGCCTGCATGAGCTAACTGGAGTAGTTCTTGAATGATAAGGTTCCTTGACAAGGCGGCCA	C/T	0	6515	-1	47	3	81	80	3	0.84492	A	B	B	B	A	B	A	A	A	B	-	A	A	B	B	B	B	B	B	-	-	A	A	A	B	A	-	B	B	B	-	B	A	-	-	A
*synopGBS1429	75.91	1B	TGCAGTTGCAAATTGGGAGCATTGACCAACAGGAGCCACGGCTAACTGCGGACCAGCGCGTTT	C/T	0	16027	-1	38	3	87	90	5	0.919786	A	B	B	-	A	-	A	A	A	A	A	A	A	B	B	B	B	B	-	-	A	A	A	A	B	A	A	B	-	B	A	-	A	B	A	A
*synopGBS546	75.91	1B	TGCAGCTAGCGCAGTCGCGACATGTTGCAGGAACCCAGCTCCCGAGCCTCTCACATCGCCAGC	C/T	0	7854	-1	42	3	89	86	6	0.903743	A	B	B	B	A	B	A	A	A	A	-	A	A	B	B	B	B	B	B	-	A	A	A	A	B	A	A	B	B	B	A	B	A	B	-	A
*synopGBS59	75.91	1B	TGCAGAAGGGATGGGGATGCGAACATATGAAGCAAGACATGAGGGCGAGGAGTTCTGAGGCGG	C/G	0	665	-1	19	3	80	83	4	0.850267	A	B	B	B	A	B	A	A	A	A	A	A	A	B	B	B	B	B	B	B	-	A	A	A	B	A	A	B	-	-	A	B	A	B	A	A
*synopGBS676	75.91	1B	TGCAGGAACTGGCTTTGGGTCGGGCACTTCGAACGACCTTCTCAGCACGGAGCTTGACCGCTC	A/G	0	9601	-1	7	3	84	81	2	0.871658	A	B	B	-	A	B	A	A	A	A	A	A	A	B	B	B	B	-	B	-	A	A	A	A	B	A	A	B	B	B	A	-	A	-	A	A
*synopGBS1051	76.71	1B	TGCAGTAACTGAGCAATCAGAGAAGAGGTCAAGCGATCCGACAATCACTAGAGCTCCACACGC	C/T	0	13183	-1	62	3	83	83	6	0.855615	A	B	B	B	A	-	-	A	-	A	A	A	A	B	B	B	B	B	B	-	A	A	A	A	-	A	A	-	B	-	A	B	A	B	A	A
*synopGBS1089	76.71	1B	TGCAGTAGAAATCAGGGAGCCGTCACGGTCACATGCATCTCTCGGACAAAATAGTCAAGGGGC	G/A	0	13473	-1	63	2	93	90	11	0.919786	A	B	B	B	A	B	A	A	A	A	A	A	-	B	B	B	B	B	B	B	A	A	A	A	B	A	A	B	B	B	A	B	A	-	A	A
*synopGBS1090	76.71	1B	TGCAGTAGAAATCAGTGAGCCGTCACGGTCACATGCATCTCTCGGACAAAATAGTCAAGGGGC	A/G	0	13474	-1	63	1	90	93	11	0.919786	A	B	B	B	A	B	A	A	A	A	A	A	-	B	B	B	B	B	B	B	A	A	A	A	B	A	A	B	B	B	A	B	A	-	A	A
*synopGBS1482	79.19	1B	TGCAGTTTTAGGGGTCTTTTTCTTCAGCACATGGTCACGGGATCAGACTGTAGAAGAATACAT	A/G	0	16541	-1	57	2	78	83	6	0.828877	A	B	B	-	A	-	A	A	-	A	A	-	A	B	B	A	B	B	B	B	-	A	A	A	-	A	A	B	B	B	A	-	-	-	A	-
*synopGBS1086	83.82	1B	TGCAGTACTGCTAAATTGTTGTACAAATTCTGCATTTCAATCGTCTCGAGAGATCGACCATGC	C/T	0	13438	-1	57	2	81	74	5	0.802139	A	B	B	B	A	B	-	A	-	A	-	A	A	B	B	A	B	B	B	B	-	A	A	-	B	-	A	-	B	B	-	-	-	-	-	A
*synopGBS1271	83.82	1B	TGCAGTGCACCCCTCCATCGCACGCAAACTCTACGCCATAAAGACCGCACAGCATACGCGTAC	A/G	0	14801	-1	40	3	71	87	4	0.823529	A	B	B	B	A	B	-	A	B	A	-	A	-	B	B	A	B	B	B	B	A	A	A	A	B	A	A	B	B	B	A	B	-	-	-	A
*synopGBS1209	90.46	1B	TGCAGTCGTTGTTGTTCGTGACTCGTGAGACGACCAAAGGTTATAGGCACTATGTGCCCATGC	A/G	0	14417	-1	44	3	83	73	5	0.807487	A	B	B	-	-	B	A	A	B	A	-	-	-	B	B	A	B	-	B	B	-	A	-	A	B	A	A	B	-	B	A	B	-	-	-	-
*synopGBS494	90.46	1B	TGCAGCCTTCCACACGCTATTCACGTCGTAGTCACCTTGCATGCGTGCATCCACCACACCCTC	C/G	0	6583	-1	62	3	80	76	2	0.823529	A	B	B	B	A	B	A	A	B	A	A	A	A	B	B	A	B	B	B	B	A	A	A	A	B	A	A	B	B	B	A	B	A	-	A	-
*synopGBS495	90.46	1B	TGCAGCCTTCCACACGCTATTCACGTCGTAGTCACCTTGCATGCGTGCATCCACCACACCCTC	C/G	0	6584	-1	63	3	80	76	2	0.823529	A	B	B	B	A	B	A	A	B	A	A	A	A	B	B	A	B	B	B	B	A	A	A	A	B	A	A	B	B	B	A	B	A	-	A	-
*synopGBS572	93.52	1B	TGCAGCTCAGAGAAGTGCATGATGGCGACGTACCCTGGCGACGGGGCATTGGGCTGGGGCCTC	A/G	0	8083	-1	8	3	71	92	4	0.850267	A	B	-	-	A	B	A	A	-	A	A	A	A	B	B	A	B	A	B	B	B	A	A	A	B	A	A	-	B	B	A	B	A	A	B	A
*synopGBS657	93.52	1B	TGCAGCTTTTCATCGCATTCTTCACAGTCAAGAATCCTCTCCATGGTGCTGATCGCTTCCTTA	C/T	0	9418	-1	48	3	73	80	3	0.802139	A	B	B	B	A	B	A	A	-	A	-	A	A	B	B	A	B	A	B	-	B	-	A	-	B	A	A	-	B	B	A	B	A	A	B	-
*synopGBS140	94.43	1B	TGCAGACCTGGACGCGGACGCGCGCCTCGTCGGCGAGCTCCACGGGGACGCTGGCCACGTCCT	A/G	0	1311	-1	56	2	76	83	6	0.818182	A	B	B	B	A	B	A	-	-	A	A	-	A	B	B	A	B	A	B	B	B	A	A	A	B	A	-	B	B	-	-	B	A	-	B	A
*synopGBS1274	96.17	1B	TGCAGTGCAGGGTTTAGTCCGCACTCTCCAATGAGCCGCTCTCTGTCGTGCTCCCAGGCGCCG	C/T	0	14842	-1	18	3	76	93	5	0.877005	A	B	B	B	A	B	A	A	B	A	-	A	A	B	B	A	B	A	B	B	-	A	A	A	B	A	A	B	B	B	A	B	A	A	B	A
*synopGBS361	97.01	1B	TGCAGCACGTCTGTCAGCTCCTTCACCGCCACCACGGTGGTCTTGTCAAGCACGCCGCGGGAC	C/T	0	4170	-1	10	2	73	86	6	0.818182	A	B	B	-	A	-	A	A	B	A	-	A	A	B	B	-	B	A	B	B	-	A	A	B	-	A	A	B	B	B	A	B	-	-	-	A
*synopGBS981	97.01	1B	TGCAGGTGACACGAGGCATCTTTGAAGCACTAGTAAAAAACAGGCCTATCGTTCGGGCCTGGC	C/G	0	12551	-1	44	2	80	78	5	0.818182	A	B	-	B	A	B	A	-	B	A	A	A	-	B	B	A	B	-	B	B	B	A	A	-	B	A	A	-	B	B	A	B	-	A	B	A
*synopGBS255	97.83	1B	TGCAGATCGTACCTATCGGCCGCGACAAGCAGGCGCAGCCATTGCCATATCGCATCTTCACCA	A/G	0	2744	-1	26	3	86	94	8	0.919786	A	B	B	B	A	B	-	A	B	A	-	A	A	B	B	A	B	A	B	B	-	A	-	B	-	A	A	B	B	B	A	B	A	A	B	A
*synopGBS573	101.22	1B	TGCAGCTCAGCGCGGAGGCAATCAAGTGACAAGTATGTTCATTAGAACCATTTGGAATAGGAC	A/G	0	8088	-1	23	3	76	85	6	0.828877	A	B	B	-	A	B	A	A	A	A	A	A	-	B	B	A	B	-	B	-	A	A	A	B	B	A	A	B	B	B	-	B	A	A	B	A
*synopGBS1062	106.59	1B	TGCAGTACAATTTTGTTCGTCGATTTTGTTGCGTGCCGACGTAAATGCCGAAGATGGGGAATT	C/T	0	13292	-1	17	3	91	94	11	0.930481	A	B	-	B	A	B	A	A	A	A	A	A	A	B	B	A	B	A	B	B	A	A	A	B	B	A	A	-	B	B	-	B	B	A	-	A
*synopGBS1063	106.59	1B	TGCAGTACAATTTTGTTCGTCGATTTTGTTGCGTGCCGACGTAAATGCCGAAGATGGGGAATT	C/G	0	13293	-1	20	3	91	94	11	0.930481	A	B	-	B	A	B	A	A	A	A	A	A	A	B	B	A	B	A	B	B	A	A	A	B	B	A	A	-	B	B	-	B	B	A	-	A
*synopGBS151	110.16	1B	TGCAGACGCCTCCGCCGCTCGTACGTTTAAAGAAGGAAATAGAAGGCGTGTTACAGACGTCGA	A/G	0	1407	-1	42	2	78	79	6	0.807487	A	B	B	-	-	B	A	A	-	A	A	A	A	-	B	A	B	A	-	-	A	A	A	B	B	A	B	B	B	-	-	-	-	-	-	-
*synopGBS214	111.09	1B	TGCAGATATAGCCAGGAGCAACTATTGCGTTGACACAAGAGCTGTTGCCGCTGACGCAAGCGT	A/G	0	2420	-1	23	2	77	86	4	0.850267	A	B	B	B	A	-	-	A	A	A	A	A	-	B	B	A	B	A	B	B	A	-	A	B	B	A	B	B	B	B	-	B	B	-	B	A
*synopGBS600	111.09	1B	TGCAGCTCGTCGGCCGTGCTCTCCGACTGTCGTGCCTCTCGGCCAGCAGCCAGATCTCCATCT	C/T	0	8423	-1	42	3	83	77	4	0.834225	A	B	B	B	A	B	A	A	-	A	A	A	A	B	B	A	B	A	B	B	A	A	A	B	B	A	B	B	-	-	A	B	B	A	-	A
*synopGBS1058	111.99	1B	TGCAGTAATCTTGCTACTGCGAGGAGCCTTTCTAGCTAAATGTCACATCTAATGTGGTTGTTT	G/T	0	13244	-1	12	3	84	88	4	0.898396	A	B	B	B	A	-	A	A	A	A	A	-	A	B	B	A	B	A	B	-	-	A	-	B	B	A	B	B	B	B	-	B	B	A	B	A
*synopGBS133	111.99	1B	TGCAGACCGCATTGGGAGCTTGCTGCCAGAGCATTGGAAGATCCCTGCACACCGACGGGCATC	C/T	0	1266	-1	42	3	77	76	3	0.802139	A	B	B	-	A	B	-	A	-	A	A	A	A	B	B	A	B	-	B	B	-	A	A	B	B	A	B	B	B	B	-	-	B	A	B	A
*synopGBS301	111.99	1B	TGCAGATGTGGTTGAGCGCGTACTCGTCTGCAACTTCAGTGACTCATCGTTTGATCATCATCT	C/T	0	3119	-1	18	1	71	94	6	0.850267	A	B	B	B	A	B	A	A	A	A	A	A	A	B	-	A	B	A	B	-	A	A	A	-	-	A	B	-	-	B	A	-	B	A	-	A
*synopGBS538	111.99	1B	TGCAGCTACTGCTATGTAGCTTCGCTCTACTTCCCCACAACCCACCAGATACATGCAGACTTG	C/T	0	7807	-1	5	3	78	85	4	0.850267	A	B	B	B	A	-	A	-	-	-	A	A	-	B	B	A	B	-	B	-	A	A	A	-	B	A	B	B	-	B	-	-	B	A	B	A
*synopGBS1404	123.97	1B	TGCAGTTCCTTGGCTCCACGAAGTTACCGATGTGGAACTCCGTTTGGGGTGCTTGGGCGCCGA	A/G	0	15829	-1	21	3	72	90	2	0.855615	A	B	B	B	A	B	A	A	-	A	A	A	A	B	B	A	B	A	B	-	A	A	A	B	B	A	B	B	-	B	A	B	B	A	B	A
*synopGBS627	123.97	1B	TGCAGCTTCACAAAAGGTTGGCATTACTTGTCCATCGACTGTTCATAGGGCTTCATAGCTGGT	A/G	0	9077	-1	54	3	78	82	5	0.828877	A	B	B	B	A	B	A	A	B	A	A	-	A	-	B	A	B	-	-	-	A	A	-	B	B	A	B	B	B	B	A	B	B	A	-	A
*synopGBS413	125.88	1B	TGCAGCCAAGGGTCCGTAGACAGAAGTGGGTGCTAATTAGAGTCTCTGGAGCAATGCTACCAA	C/T	0	5200	-1	20	3	68	84	2	0.802139	A	B	-	B	A	B	-	A	B	A	-	A	-	B	B	A	B	A	B	B	-	-	A	-	B	A	-	B	B	B	A	B	B	-	B	-
*synopGBS414	125.88	1B	TGCAGCCAAGGGTCCGTAGACAGAAGTGGGTGCTAATTAGAGTCTCTGGAGCAATGCTACCAA	T/C	0	5201	-1	30	3	68	84	2	0.802139	A	B	-	B	A	B	-	A	B	A	-	A	-	B	B	A	B	A	B	B	-	-	A	-	B	A	-	B	B	B	A	B	B	-	B	-
*synopGBS120	126.82	1B	TGCAGACCAAAAGCTCCAATCAACCCGAGACCATCCATGTTACCTCAAGGCTATTGGTGTAGC	A/G	0	1148	-1	10	3	89	77	6	0.855615	A	B	B	B	A	-	-	A	B	A	-	A	A	-	B	A	B	A	B	B	A	A	A	B	-	A	B	B	B	B	-	B	A	-	-	A
*synopGBS1223	126.82	1B	TGCAGTCTCGCATCTCCGCCTGATGGACGCCCGACGATAGCGAGAGAGCACGAGCTCGTCCGC	A/G	0	14484	-1	49	2	74	82	6	0.802139	A	B	B	-	A	-	-	A	-	-	A	A	-	B	B	-	B	A	B	B	A	A	A	-	B	A	B	B	-	B	-	-	-	-	-	A
*synopGBS1011	130.33	1B	TGCAGGTTGAGATCAGGGCCAACGACCAGGGCAACCACACCACACTACATAGCCTGAACCATC	C/T	0	12943	-1	42	3	76	84	5	0.828877	A	B	B	-	A	-	-	A	B	A	A	A	A	B	A	A	B	A	A	B	-	A	A	B	B	A	B	B	B	B	A	-	A	A	-	B
*synopGBS1012	130.33	1B	TGCAGGTTGAGATCAGGGCCAACGACCAGGGCAACCACACCACACTACATAGCCTGAACCATC	A/G	0	12944	-1	43	3	76	84	5	0.828877	A	B	B	-	A	-	-	A	B	A	A	A	A	B	A	A	B	A	A	B	-	A	A	B	B	A	B	B	B	B	A	-	A	A	-	B
*synopGBS153	133.04	1B	TGCAGACGCGCCCTTGTCCCCAACCTTGGAGAAACCCCCATCCGCATTTATCTTAGTGTCATG	A/G	0	1418	-1	54	3	82	75	4	0.818182	A	B	B	A	A	B	A	A	-	A	A	A	-	B	A	A	-	A	A	-	A	-	A	-	-	A	B	-	B	B	A	B	-	-	B	-
*synopGBS1346	145.73	1B	TGCAGTTAAATTTGTGGCGAAGGGGTTTCCAACTTGGGGGCAGCGTGCGTGTGAGGGGAGGTG	A/G	0	15455	-1	7	3	74	91	3	0.86631	A	B	B	A	A	-	A	-	-	B	A	A	B	-	A	A	B	A	A	B	A	A	B	A	B	A	-	A	B	-	A	B	A	A	B	-
*synopGBS1168	146.52	1B	TGCAGTCCAAAGGCGCCGTCCTTCCGTCCCCGCTCACGCGCCTCTGCATTGGAGCTCGCCGCG	G/C	0	14039	-1	53	3	82	93	5	0.909091	A	B	B	A	A	A	A	A	B	B	-	A	B	A	A	A	B	A	A	B	A	A	B	A	B	A	B	A	B	B	-	-	A	A	B	B
*synopGBS1169	146.52	1B	TGCAGTCCAAAGGCGTCGTCCTTCCGTCCCCGCTCACGCGCCTCTGCATTGGACCTCGCCGCG	C/G	0	14040	-1	53	1	93	79	4	0.898396	A	B	B	A	A	A	A	A	B	B	-	A	B	A	A	A	B	A	A	B	A	A	B	A	B	A	B	A	B	B	-	-	A	A	B	B
*synopGBS225	147.25	1B	TGCAGATCAGGCACGCGCGCAGCTTTGTAGGGCGGCCCAGCAGCCGAAGTCAAAATCCTGTCG	C/T	0	2532	-1	43	3	80	94	5	0.903743	A	B	B	-	-	-	A	A	B	B	A	A	A	A	A	A	B	A	A	-	A	A	B	A	B	A	B	A	B	B	A	B	A	A	-	B
*synopGBS752	147.25	1B	TGCAGGATTAGGGACCAGCTCGGGCATAGCTCCACGTCTCCCTCACTAGGAACGCGGTCCAGC	A/G	0	10386	-1	44	3	86	95	7	0.930481	A	B	B	A	A	A	A	A	B	B	A	A	A	A	A	A	B	A	A	B	A	A	B	A	B	A	B	A	B	B	A	-	A	A	B	B
*synopGBS270	148.04	1B	TGCAGATGAACTGTTACTGCATAGGCTTTCCAATTTGTTCAGCCTTTTCAAAACGAGAACTTC	C/G	0	2840	-1	29	3	87	72	4	0.828877	A	B	B	-	A	-	A	A	B	B	-	A	A	A	A	A	B	A	-	-	-	-	B	A	B	A	-	A	B	-	A	-	A	A	B	B
*synopGBS415	148.04	1B	TGCAGCCACAAATCGAGCAATCGAATCACACCATGAGCAACAGAAATGGAAGCTCGCGGCGAA	G/T	0	5229	-1	60	3	89	85	14	0.855615	A	B	B	-	A	A	A	A	B	-	A	-	A	A	A	A	-	A	A	-	A	A	B	A	B	A	-	A	B	-	A	B	A	A	-	B
*synopGBS1104	0	1D	TGCAGTAGCAAGCAACACGCACACACAGCGCCTCCAGTTGTCTCGGAGGAAAGGAAGCGGGCG	A/G	0	13527	-1	20	3	91	85	7	0.903743	A	B	A	B	B	-	A	A	A	B	B	B	-	A	B	A	A	A	A	-	A	B	B	A	A	B	B	A	A	B	B	A	A	B	B	B
*synopGBS77	0	1D	TGCAGAATGCCGTTGTATTCCTTGCAAAACTCGCTCAGTTTAGGGTGTATTATCGGGCAGACG	C/T	0	831	-1	19	3	85	85	7	0.871658	A	B	A	B	B	A	A	-	A	B	B	B	B	A	B	A	A	-	A	A	A	B	B	A	A	B	B	-	A	-	B	A	A	-	B	B
*synopGBS78	0	1D	TGCAGAATGCCGTTGTATTCCTTGCAAAACTCGCTCAGTTTAGGGTGTATTATCGGGCAGACG	T/C	0	832	-1	40	3	85	85	7	0.871658	A	B	A	B	B	A	A	-	A	B	B	B	B	A	B	A	A	-	A	A	A	B	B	A	A	B	B	-	A	-	B	A	A	-	B	B
*synopGBS79	0	1D	TGCAGAATGCCGTTGTATTCCTTGCAAAACTCGCTCAGTTTAGGGTGTATTATCGGGCAGACG	A/G	0	833	-1	41	3	85	85	7	0.871658	A	B	A	B	B	A	A	-	A	B	B	B	B	A	B	A	A	-	A	A	A	B	B	A	A	B	B	-	A	-	B	A	A	-	B	B
*synopGBS491	5.66	1D	TGCAGCCTGTATAGTACAGTATGTTTGCGCATCCAACTGTTGGGGGCGATTAGGTCTGAGACA	G/T	0	6559	-1	59	3	81	79	7	0.818182	A	B	A	-	B	A	-	-	-	B	-	B	-	A	B	A	A	-	A	-	A	-	B	A	A	B	-	-	A	B	-	B	A	B	-	-
*synopGBS762	18.74	1D	TGCAGGCAATGAAATCAACCAAGAAACGGAACTGCCCCCGTGTCATCCGTGTGGGTGACAGGG	A/G	0	10483	-1	44	3	73	93	8	0.84492	A	B	B	B	B	A	A	-	A	B	B	B	B	-	B	A	A	A	A	-	B	B	-	A	A	B	B	-	-	B	B	B	-	B	B	B
*synopGBS319	28.81	1D	TGCAGATTGACCCATTCCCCTGCGCATATCTAGGCATGCCAGGTCGTCTCGCCAGAGGTGACT	A/G	0	3269	-1	5	3	90	68	6	0.812834	A	B	B	B	A	-	A	B	-	-	-	B	-	A	B	A	-	A	A	-	B	B	A	-	-	B	B	A	-	B	B	B	-	-	B	B
*synopGBS1342	40.18	1D	TGCAGTGTTACCAGCTGATAAGCAAAGAAGATCACGTAACTCCTTGCCTTTCGCCAAAACGGC	C/T	0	15409	-1	59	2	88	81	5	0.877005	A	B	-	-	A	-	A	B	-	B	B	-	B	A	B	A	A	A	A	-	B	B	A	B	A	B	B	A	A	B	A	B	A	B	-	B
*synopGBS724	72.74	1D	TGCAGGAGGATGTTGAGTAACTTGATTGTATTAGGAAACATAGGGTGGGTTCGTCGCTGCACT	C/T	0	10150	-1	20	3	78	83	5	0.834225	A	B	-	B	A	A	A	B	A	B	B	B	-	A	B	A	A	A	A	-	-	-	-	B	B	A	B	A	A	B	A	B	A	-	-	B
*synopGBS725	72.74	1D	TGCAGGAGGATGTTGAGTAACTTGATTGTATTAGGAAACATAGGGTGGGTTCGTCGCTGCACT	G/A	0	10151	-1	44	3	78	83	5	0.834225	A	B	-	B	A	A	A	B	A	B	B	B	-	A	B	A	A	A	A	-	-	-	-	B	B	A	B	A	A	B	A	B	A	-	-	B
*synopGBS200	80.52	1D	TGCAGAGGAGGTCAGAGTTCCTCATCTCTGAGGTGGGGCTGGAACCGACATACATTGCTCATC	C/G	0	2053	-1	45	2	77	76	3	0.802139	A	B	A	-	-	-	-	B	A	B	B	B	-	A	A	A	A	A	A	A	A	B	-	B	B	A	B	A	A	B	A	B	A	-	A	B
*synopGBS1393	81.36	1D	TGCAGTTCCAGTGGTGCTCCATTGCAACCCTGACAAAGCTTTGACGACCCTCCAGTGTGCTTC	C/T	0	15762	-1	29	3	91	84	5	0.909091	A	B	A	B	A	A	A	B	A	B	B	B	-	A	A	A	A	A	A	A	A	B	B	B	B	A	B	A	A	B	A	B	A	B	A	B
*synopGBS342	82.99	1D	TGCAGCAAGCTAAACCAAGTCTTGAAACTGGAGCAGCGAACAATTCTAAAGTCGCTTGAGGCT	A/G	0	3711	-1	12	1	79	81	6	0.823529	A	B	A	-	A	-	A	B	A	B	B	B	-	A	A	A	A	A	A	-	A	B	B	B	B	-	B	A	A	B	A	B	A	B	A	-
*synopGBS1084	88.88	1D	TGCAGTACTATGAAACGCCCCGTCCACATTGATTTTCAACTGATCCCCGTCAGGCCTAGTCCG	A/T	0	13417	-1	57	3	83	92	6	0.903743	A	B	A	B	A	A	A	B	A	B	B	B	B	A	A	A	A	A	A	-	A	B	B	B	B	A	B	A	A	B	B	B	A	B	A	A
*synopGBS468	90.39	1D	TGCAGCCTCAGCAGTGAGTTCGGGGGCGCTGCCTGTGCCCGCCTGCGTGCCGTCCACGGCGAC	C/T	0	6337	-1	41	3	93	84	10	0.893048	-	B	A	B	A	A	A	B	A	B	-	B	B	A	A	-	A	A	A	A	A	B	B	B	B	A	B	A	A	B	-	B	A	B	A	A
*synopGBS1314	98.45	1D	TGCAGTGGCCAAGTTACCTCAAGTCCTCAAATCGGGCTAAACACTGGCCGCCGAGCAGGATTG	C/T	0	15130	-1	63	3	93	75	7	0.860963	A	B	B	-	-	A	A	A	A	B	B	B	B	A	A	A	A	A	A	A	A	B	B	B	B	A	B	A	A	B	B	B	A	B	A	A
*synopGBS1331	99.29	1D	TGCAGTGTCCCATCCTGATGTGGAGCCGTGGAGGCATCCTCGATTGGGGTTGTTGAAGGTGTG	C/T	0	15325	-1	26	3	69	94	7	0.834225	A	B	B	B	A	-	A	A	A	B	B	B	B	-	A	A	A	A	A	A	A	B	B	B	B	-	B	A	A	B	B	B	A	B	-	A
*synopGBS796	117.49	1D	TGCAGGCCAAAGTCTTGATAACCAGCGGATCCCTTATGGATTCGTACTTGGGGATCCTTCCAG	T/G	0	10709	-1	54	3	90	71	6	0.828877	A	B	B	-	A	A	B	A	-	B	B	B	-	A	B	A	A	A	A	-	A	-	B	A	B	A	B	A	B	-	-	B	A	B	-	-
*synopGBS797	117.49	1D	TGCAGGCCAAAGTCTTGATAACCAGCGGATCCCTTATGGATTCGTACTTGGTGAGCCTTCCAG	G/T	0	10710	-1	54	1	71	90	6	0.828877	A	B	B	-	A	A	B	A	-	B	B	B	-	A	B	A	A	A	A	-	A	-	B	A	B	A	B	A	B	-	-	B	A	B	-	-
*synopGBS1036	129.31	1D	TGCAGGTTTGCTGCACCGCCTCAACGAATACGACCAATAAGCGACAAAATTATGGAATCCGAC	A/C	0	13068	-1	51	3	88	80	3	0.882353	A	B	A	B	A	B	B	A	A	B	B	B	B	A	A	A	A	A	A	A	-	B	B	A	B	A	B	A	B	B	B	A	A	-	A	A
*synopGBS80	129.31	1D	TGCAGAATGCGTCTTCCTGAATGGCATGATGCATTTTATGCATTCCTTGCTCCATAAACTTTC	A/G	0	837	-1	25	3	73	92	6	0.850267	A	B	A	B	-	B	-	-	A	B	B	B	B	A	A	A	A	-	A	A	A	B	B	A	-	A	B	-	B	B	B	A	A	B	-	A
*synopGBS81	129.31	1D	TGCAGAATGCGTCTTCCTGAATGGCATGATGCATTTTATGCATTCCTTGCTCCATAAACTTTC	C/G	0	838	-1	45	3	73	92	6	0.850267	A	B	A	B	-	B	-	-	A	B	B	B	B	A	A	A	A	-	A	A	A	B	B	A	-	A	B	-	B	B	B	A	A	B	-	A
*synopGBS772	135.62	1D	TGCAGGCACGATACACTTGTGGAACTTCCAACAATTCCTATGGCAGCATGAGGAGCACCAAGG	C/T	0	10536	-1	13	3	79	75	4	0.802139	A	B	A	B	A	-	-	-	-	B	B	-	B	A	A	A	-	A	A	A	A	B	B	A	B	A	B	A	B	B	-	A	-	-	A	A
*synopGBS917	138.87	1D	TGCAGGTAACGCGGCTCAAGTGTGGAGGCTTCATATTTGGGCACCGTGTGTGCCACTGCATGG	A/G	0	12114	-1	7	1	92	86	4	0.930481	A	B	A	-	A	B	B	A	A	B	B	B	B	A	A	A	A	A	A	-	A	B	B	A	B	A	B	A	B	B	B	A	A	B	A	A
*synopGBS193	143.64	1D	TGCAGAGCATGCTGACTCTGGCTGGGACCAAGATGTGAGCTTTGCGACGGCACCAATGGAGCC	A/G	0	1895	-1	46	3	86	75	4	0.839572	A	B	A	-	A	B	B	B	-	B	A	B	B	A	-	A	A	A	A	A	A	B	B	A	B	A	B	B	-	B	B	A	A	B	A	A
*synopGBS194	143.64	1D	TGCAGAGCATGCTGACTCTGGCTGGGACCAAGATGTGAGCTTTGCGACGGCACCAATGGAGCC	C/A	0	1896	-1	47	3	86	75	4	0.839572	A	B	A	-	A	B	B	B	-	B	A	B	B	A	-	A	A	A	A	A	A	B	B	A	B	A	B	B	-	B	B	A	A	B	A	A
*synopGBS195	143.64	1D	TGCAGAGCATGCTGACTCTGGCTGGGACCAAGATGTGAGCTTTGCGACGGCACCAATGGAGCC	C/T	0	1897	-1	62	3	86	75	4	0.839572	A	B	A	-	A	B	B	B	-	B	A	B	B	A	-	A	A	A	A	A	A	B	B	A	B	A	B	B	-	B	B	A	A	B	A	A
*synopGBS648	149.2	1D	TGCAGCTTGGTGCTCGCCATCTCGCGCAGCCTGGCGATGTCGGCCGCGTCGATGTAGTAGAGG	C/T	0	9335	-1	46	3	80	75	4	0.807487	A	B	A	B	A	B	B	-	A	B	A	B	B	-	A	A	-	A	A	-	A	B	B	A	B	A	-	B	B	-	-	A	-	-	A	B
*synopGBS132	154.66	1D	TGCAGACCGATCTAGCGGAGCACCCATCGGTCGGGATCGCGAGCCATCCATCAAACCTGCTCG	G/T	0	1259	-1	42	3	75	82	6	0.807487	A	B	-	-	A	B	B	-	A	B	-	-	B	-	A	A	A	-	A	-	A	B	-	A	B	A	-	B	-	-	-	A	B	B	A	B
*synopGBS377	154.66	1D	TGCAGCATCAACATCTACTGGTTGAATCAAATTTCTATTTGCGAGCTCATTGAAGTAACTCTC	C/G	0	4829	-1	14	3	87	69	6	0.802139	A	B	A	-	A	B	B	B	-	B	A	B	-	-	-	A	-	-	A	A	A	B	-	A	B	A	B	B	B	B	-	-	B	B	-	B
*synopGBS378	154.66	1D	TGCAGCATCAACATCTACTGGTTGAATCAAATTTCTATTTGCGAGCTCATTGAAGTAACTCTC	A/G	0	4830	-1	30	3	87	69	6	0.802139	A	B	A	-	A	B	B	B	-	B	A	B	-	-	-	A	-	-	A	A	A	B	-	A	B	A	B	B	B	B	-	-	B	B	-	B
*synopGBS379	154.66	1D	TGCAGCATCAACATCTACTGGTTGAATCAAATTTCTATTTGCGAGCTCATTGAAGTAACTCTC	G/A	0	4831	-1	42	3	87	69	6	0.802139	A	B	A	-	A	B	B	B	-	B	A	B	-	-	-	A	-	-	A	A	A	B	-	A	B	A	B	B	B	B	-	-	B	B	-	B
*synopGBS827	154.66	1D	TGCAGGCGCCGTTGTTTGTGGAGACTAACATGGCGTTGGGGGGGGCGGCATCCCGCAAGCAAC	G/A	0	11107	-1	32	3	73	84	5	0.812834	A	B	A	B	A	B	-	B	A	B	A	B	-	B	-	A	-	B	A	-	A	B	B	A	B	A	B	B	B	B	B	A	B	-	-	B
*synopGBS1152	0	2A	TGCAGTCACACATCCGCGTACAGGCACACAAATTTAGTTACACCTCTGTGTACGGGCACACAG	A/G	0	13892	-1	7	3	77	90	5	0.86631	A	B	A	A	-	B	-	B	-	A	A	A	-	B	B	A	-	B	B	B	A	A	A	-	A	A	A	A	B	B	B	A	B	A	A	B
*synopGBS1153	0	2A	TGCAGTCACACATCCGCGTACAGGCACACAAATTTAGTTACACCTCTGTGTACGGGCACACAG	A/G	0	13893	-1	27	3	77	90	5	0.86631	A	B	A	A	-	B	-	B	-	A	A	A	-	B	B	A	-	B	B	B	A	A	A	-	A	A	A	A	B	B	B	A	B	A	A	B
*synopGBS1154	0	2A	TGCAGTCACACATCCGCGTACAGGCACACAAATTTAGTTACACCTCTGTGTACGGGCACACAG	G/A	0	13894	-1	62	3	77	90	5	0.86631	A	B	A	A	-	B	-	B	-	A	A	A	-	B	B	A	-	B	B	B	A	A	A	-	A	A	A	A	B	B	B	A	B	A	A	B
*synopGBS726	0	2A	TGCAGGAGGGACGACGGCCTTCCCCCGTTCTTCGGCTTGGCGCTGAAGGTCTTCCTCGCATGT	C/T	0	10184	-1	25	3	86	71	3	0.823529	A	B	A	A	B	B	B	-	B	A	A	A	B	B	B	A	B	B	B	B	A	A	A	B	-	A	A	A	B	B	B	A	B	A	A	B
*synopGBS727	0	2A	TGCAGGAGGGACGACGGCCTTCCCCCGTTCTTCGGCTTGGCGCTGAAGGTCTTCCTCGCATGT	A/G	0	10185	-1	59	3	93	74	13	0.823529	A	B	A	A	B	B	B	-	B	A	A	A	B	B	B	A	B	B	B	B	A	A	A	B	-	A	A	A	B	B	B	A	B	A	A	B
*synopGBS1087	2.94	2A	TGCAGTACTGTGCGAGACAGCGTGGCCGTGTGATGCGGCAAGCGCATGAGAGGCTGGAGCAAG	A/G	0	13445	-1	6	3	80	98	5	0.925134	A	B	A	A	-	-	-	B	B	B	A	A	B	B	B	A	B	B	B	B	A	A	A	B	A	A	A	A	B	B	B	A	B	A	A	B
*synopGBS136	8.09	2A	TGCAGACCTATTTGCCGCACGGTAGCAGATGCAGTCCATGGGTTGGACGCCATTGTTGGCTAC	A/G	0	1297	-1	26	2	105	74	6	0.925134	A	B	A	A	B	B	B	B	B	B	-	A	B	B	B	A	B	B	B	B	A	B	A	B	A	A	A	A	B	B	B	-	B	-	A	B
*synopGBS137	8.86	2A	TGCAGACCTCACCATATAGCTGGTGTTCAGGTGCCTAGAGGGATTGGGAAACTGACGGCGTTG	A/G	0	1298	-1	13	3	76	104	10	0.909091	A	B	A	-	B	B	B	B	B	B	A	A	B	B	B	A	B	B	B	B	A	B	A	B	A	A	A	A	B	B	B	A	B	A	-	-
*synopGBS346	8.86	2A	TGCAGCACAAGGCGTACCTATACTTCGGCAAAGCCAGCACCAACAAGCCGCTGGAGGCGCTCC	C/T	0	3898	-1	25	3	71	88	3	0.834225	A	B	A	A	B	-	B	B	-	B	A	A	B	B	B	A	B	B	B	B	A	B	A	B	A	A	A	A	B	B	B	A	B	-	-	B
*synopGBS443	8.86	2A	TGCAGCCCCTGCTGAACGGGAACGGCCGCCCCTTCCACTCTGAACCCAAACCAAAATTCAGAC	C/T	0	5805	-1	44	3	90	66	3	0.818182	A	B	A	A	-	B	B	-	-	B	A	-	B	-	B	A	B	B	B	-	-	B	A	B	A	A	A	A	B	B	B	A	B	-	-	-
*synopGBS444	8.86	2A	TGCAGCCCCTGCTGAACGGGAACGGCCGCCCCTTCCACTCTGAACCCAAACCAAAATTCAGAC	C/A	0	5806	-1	63	3	90	66	3	0.818182	A	B	A	A	-	B	B	-	-	B	A	-	B	-	B	A	B	B	B	-	-	B	A	B	A	A	A	A	B	B	B	A	B	-	-	-
*synopGBS634	8.86	2A	TGCAGCTTCCTCTGAAGTGTTCCCGATGTTGTCGTTCGTCGTTTGTGTGCAGCGGCCAAAGCC	A/G	0	9150	-1	15	3	84	79	4	0.850267	A	B	A	A	B	-	B	-	-	B	A	A	-	B	B	A	B	B	B	-	A	B	A	B	A	A	A	A	B	-	-	A	B	A	A	B
*synopGBS635	8.86	2A	TGCAGCTTCCTCTGAAGTGTTCCCGATGTTGTCGTTCGTCGTTTGTGTGCAGCGGCCAAAGCC	A/C	0	9151	-1	25	3	84	79	4	0.850267	A	B	A	A	B	-	B	-	-	B	A	A	-	B	B	A	B	B	B	-	A	B	A	B	A	A	A	A	B	-	-	A	B	A	A	B
*synopGBS659	8.86	2A	TGCAGCTTTTGCCATTGCACTGTGCGCACGCTTAGCTTCGTATTAGGCTCTAAGAAACAATTC	C/T	0	9432	-1	38	3	102	65	8	0.850267	A	B	-	-	B	B	B	B	B	B	-	A	B	B	B	A	B	B	B	B	-	B	A	B	A	A	A	A	B	B	B	A	B	-	A	B
*synopGBS1435	9.77	2A	TGCAGTTGCCGAGGTACAGGGACTGGAAGGGCGCCTGACGATTCTGGACGATGACACGTACGC	A/C	0	16061	-1	40	3	96	75	8	0.871658	A	B	A	-	B	B	B	-	B	B	A	A	B	B	B	A	B	-	B	B	A	B	-	B	A	A	A	A	-	B	B	A	B	A	-	B
*synopGBS1445	9.77	2A	TGCAGTTGGGCAACATCATTATCGCCAACATCACATTGGAGAAGGCGCAGATGGGGGTCTACA	A/G	0	16162	-1	50	3	102	72	8	0.887701	-	B	A	A	B	B	-	-	B	B	A	-	B	B	B	A	B	B	B	B	-	B	A	B	A	A	A	A	B	B	B	A	B	A	-	B
*synopGBS347	9.77	2A	TGCAGCACAAGGCGTACCTATACTTCGGCAAAGCCAGCACCAACAAGCCGCTGGAGGCGCTCC	C/A	0	3899	-1	39	3	71	88	3	0.834225	A	B	A	A	B	-	B	B	-	B	A	A	B	B	B	A	B	B	B	B	A	B	A	B	A	A	A	A	B	B	B	A	B	-	-	B
*synopGBS849	9.77	2A	TGCAGGCTGGGTTGCCTCTACTGCTGCTGCCAGATTTTGGCACCAATAATAAGGCAAGGCGAT	C/T	0	11388	-1	42	2	66	88	4	0.802139	A	B	A	A	B	B	B	-	B	B	-	A	B	B	B	A	B	B	B	B	A	B	A	-	A	A	A	A	B	B	-	-	B	A	A	B
*synopGBS1220	16.45	2A	TGCAGTCTCCCGTCAGCATTTTTCTTTTGGTGATGAACTCTCATGTCAGCTTTAGGCAGGGAG	C/G	0	14471	-1	37	1	75	92	6	0.860963	A	B	A	-	B	B	B	B	B	B	A	-	B	B	B	A	-	B	B	-	-	B	A	B	B	A	A	A	-	B	B	-	B	A	-	B
*synopGBS398	26	2A	TGCAGCATTGCGGACCACTGCAACGGCCTCCTGTTGCTCGATGTTCACGAGGACCATTACTAC	C/T	0	5084	-1	10	3	81	95	7	0.903743	A	B	-	B	B	A	-	B	B	A	A	A	B	B	-	A	B	B	B	B	A	B	A	B	B	A	A	A	B	B	-	B	B	A	A	B
*synopGBS399	26	2A	TGCAGCATTGCGGACCACTGCAACGGCCTCCTGTTGCTCGATGTTCACGAGGACCATTACTAC	G/C	0	5085	-1	32	3	81	101	13	0.903743	A	B	-	B	B	A	-	B	B	A	A	A	B	B	-	A	B	B	B	B	A	B	A	B	B	A	A	A	B	B	-	B	B	A	A	B
*synopGBS855	26.79	2A	TGCAGGCTTCAGGAGCGGCACCACGTTCACCTCGGCCCAGGGCTCTAGCTGGGCGAATACCTC	A/G	0	11418	-1	28	3	84	76	3	0.839572	A	B	A	-	B	A	B	-	B	A	A	A	B	-	B	A	B	B	B	B	A	B	A	B	-	A	A	A	B	B	B	-	B	-	A	B
*synopGBS1016	33.16	2A	TGCAGGTTGCTCATGGCGGCACCGAAGAGACTCTGTTGATCCCACGACTGCTGAGCGGGGCCG	A/G	0	12974	-1	20	3	79	84	8	0.828877	A	B	-	B	B	A	-	-	-	A	A	-	B	B	B	A	B	A	B	B	-	-	A	B	B	A	A	A	B	A	A	B	B	A	A	B
*synopGBS1017	33.16	2A	TGCAGGTTGCTCATGGCGGCACCGAAGAGACTCTGTTGATCCCACGACTGCTGAGCGGGGCCG	A/G	0	12975	-1	25	3	79	87	11	0.828877	A	B	-	B	B	A	-	-	-	A	A	-	B	B	B	A	B	A	B	B	-	-	A	B	B	A	A	A	B	A	A	B	B	A	A	B
*synopGBS374	42.28	2A	TGCAGCAGGGTTAAGGAGGGCCTGGGAACGCCCAAGGGAGCTATGGTCACCGTGATCTCTGTG	C/G	0	4686	-1	50	3	85	71	3	0.818182	A	B	-	B	B	A	-	B	A	A	A	-	B	A	B	A	A	A	B	-	A	B	A	B	B	A	A	A	B	-	A	B	B	A	A	B
*synopGBS262	46.79	2A	TGCAGATCTCGCCAGCCAAGGGAGGAGAGGGTCCCACCGCTGCTCTAATGGCGAGGAGGAGAG	C/T	0	2784	-1	37	3	82	80	2	0.855615	A	B	A	-	B	-	B	-	-	A	A	-	B	A	-	A	A	-	B	A	A	B	A	-	B	A	A	A	B	A	A	B	-	A	A	B
*synopGBS10	63.3	2A	TGCAGAAAACAAACACATGTCAGAATAAGCACTAGGATTCCACAATTGTAATGAAGTTTCAAC	A/G	0	43	-1	23	3	83	72	4	0.807487	A	B	A	B	B	-	B	-	-	A	A	A	B	-	-	A	A	-	A	A	A	A	A	-	A	A	A	A	B	-	A	-	-	-	A	B
*synopGBS192	63.3	2A	TGCAGAGCATCATCCATCCCATCCCCAGGTCATAAACCCAAGTCGGACTCGCCTTCCTCCTCC	C/G	0	1886	-1	62	3	72	85	3	0.823529	A	B	A	B	B	A	B	A	A	A	A	A	B	A	B	-	A	-	A	A	A	A	A	B	A	A	A	A	B	B	A	B	B	A	A	B
*synopGBS700	64.98	2A	TGCAGGACGAGGCATCTCATCCTCCTCTCCCTCGCGGCCTCACCCATCATTTCCTTGGCCCCT	A/G	0	9874	-1	41	3	91	79	7	0.871658	-	B	A	B	B	A	B	A	A	A	A	A	B	A	B	A	A	A	A	A	A	A	A	B	A	A	A	A	B	B	A	B	-	B	A	B
*synopGBS747	64.98	2A	TGCAGGATGATGGGTTCCACCGAACCAATGGTTTCTTTTCGCTTCCCCAGGACAGGAGAGGAG	C/G	0	10344	-1	25	3	77	83	4	0.834225	A	B	A	-	B	A	-	A	-	A	A	A	B	A	B	A	A	A	A	A	-	A	A	B	A	A	A	A	B	B	-	B	-	-	A	B
*synopGBS768	64.98	2A	TGCAGGCACATCACAATTTGATTGGACGTCGCAAGGCCCGTTGTAGGAGCATCGAGAGAAAGT	A/G	0	10514	-1	9	1	71	89	3	0.839572	A	B	A	B	B	A	-	A	A	A	A	A	-	A	B	A	A	A	A	-	A	A	A	B	A	A	A	A	B	B	A	B	-	-	A	B
*synopGBS873	64.98	2A	TGCAGGGACAGTCCTAGCATGCGGTATAGTTGGGCACCGTAGGCCTGCCCGCATAGCGTCTCC	A/G	0	11517	-1	35	2	77	100	6	0.914439	A	B	A	B	B	-	-	A	A	A	-	A	B	A	B	A	A	A	A	A	A	A	A	B	A	A	A	A	B	B	A	B	B	A	-	B
*synopGBS1082	66.57	2A	TGCAGTACGTGGATCGAGCCATCTTCTCCGTGCACGAGCGTCGTCATCCGCCGTTGATTCGCT	C/T	0	13406	-1	18	3	83	89	4	0.898396	A	B	A	-	B	A	B	A	A	A	A	A	B	A	B	A	A	A	A	A	-	A	A	B	A	A	A	A	B	-	A	-	B	B	-	B
*synopGBS979	66.57	2A	TGCAGGTCTGGGCAAGAACGGCGCAATCCCTGGGAAGCCCGTTCAATCCCTGGGAAGCCCATT	G/A	0	12520	-1	56	3	84	81	7	0.84492	A	B	-	B	B	-	-	-	-	-	A	-	B	A	B	A	A	A	A	A	A	A	A	B	A	A	-	-	B	B	A	-	B	B	-	-
*synopGBS1148	67.4	2A	TGCAGTCAAGTTCTCTCCACTAAAGAAAGGAAAGCGAGCGAGCAAAAGCAGGCGTGGCTCCTT	A/T	0	13878	-1	18	3	78	79	3	0.823529	A	B	-	B	B	A	-	A	-	A	A	A	-	-	B	-	-	A	A	-	A	A	-	B	A	A	A	A	-	B	A	-	-	A	-	B
*synopGBS1206	67.4	2A	TGCAGTCGTGCGGATATTCGATCTGGCCGCAGGCGCAACTGGAAATCACGTTGCATCCCCGTG	A/G	0	14395	-1	15	3	78	89	2	0.882353	A	B	A	-	B	-	B	A	A	A	A	A	B	A	B	A	A	A	A	A	A	A	A	B	A	A	A	A	B	B	A	-	B	A	A	B
*synopGBS1207	67.4	2A	TGCAGTCGTGCGGATATTCGATCTGGCCGCAGGCGCAACTGGAAATCACGTTGCATCCCCGTG	T/C	0	14396	-1	16	3	78	89	2	0.882353	A	B	A	-	B	-	B	A	A	A	A	A	B	A	B	A	A	A	A	A	A	A	A	B	A	A	A	A	B	B	A	-	B	A	A	B
*synopGBS1289	68.14	2A	TGCAGTGCCTTGGGCCTCTCCTCCTCGAAGCTGGGCTGCGCTGCCACGGCGGACATGCCGTCC	A/G	0	14938	-1	27	3	88	90	4	0.930481	A	B	A	B	B	A	B	A	A	A	A	A	B	A	B	A	A	A	-	A	A	A	A	B	A	A	A	A	-	B	A	B	B	A	A	B
*synopGBS1290	68.14	2A	TGCAGTGCCTTGGGCCTCTCCTCCTCGAAGCTGGGCTGCGCTGCCACGGCGGACATGCCGTCC	T/C	0	14939	-1	41	3	88	90	4	0.930481	A	B	A	B	B	A	B	A	A	A	A	A	B	A	B	A	A	A	-	A	A	A	A	B	A	A	A	A	-	B	A	B	B	A	A	B
*synopGBS1297	68.14	2A	TGCAGTGCGGCGCCACCGCAGTACCGCCCTGACCTTTGCATCGCCAGCGTCCCTGCCTCGCTG	C/T	0	14970	-1	15	3	97	59	2	0.823529	A	B	A	-	B	A	B	A	A	A	A	A	-	A	B	A	A	A	A	A	A	A	A	B	A	A	A	A	-	B	A	B	B	A	A	B
*synopGBS1298	68.14	2A	TGCAGTGCGGCGCCACCGCAGTACCGCCCTGACCTTTGCATCGCCAGCGTCCCTGCCTCGCTG	C/T	0	14971	-1	24	3	97	59	2	0.823529	A	B	A	-	B	A	B	A	A	A	A	A	-	A	B	A	A	A	A	A	A	A	A	B	A	A	A	A	-	B	A	B	B	A	A	B
*synopGBS1299	68.14	2A	TGCAGTGCGGCGCCACCGCAGTACCGCCCTGACCTTTGCATCGCCAGCGTCCCTGCCTCGCTG	C/T	0	14972	-1	43	3	97	59	2	0.823529	A	B	A	-	B	A	B	A	A	A	A	A	-	A	B	A	A	A	A	A	A	A	A	B	A	A	A	A	-	B	A	B	B	A	A	B
*synopGBS1398	68.99	2A	TGCAGTTCCTCCCCCCGCCCTTCTCCAACCTCACGCAGCTCGTCGACAGCTTCAAGGCCAAGA	C/T	0	15803	-1	24	1	94	81	7	0.898396	A	B	A	-	-	A	B	A	A	A	A	A	-	-	B	A	A	A	A	A	A	A	A	B	A	-	-	A	B	B	A	-	B	A	-	B
*synopGBS1432	68.99	2A	TGCAGTTGCATTATCACCTGTGCAGTGCTCTCCTCTGAAGCTGGCGCTTTGACAGGGATAGTG	C/G	0	16042	-1	22	3	87	91	6	0.919786	A	B	A	B	B	-	B	A	A	A	A	A	-	A	B	A	A	A	A	-	A	A	A	-	A	A	A	A	B	B	A	-	B	-	A	B
*synopGBS1475	70.7	2A	TGCAGTTTGAACTACAACACGTCCAAACCAACGAATACACAAATGCCATTGGTTGGACGATGT	C/G	0	16448	-1	23	3	82	77	3	0.834225	A	B	A	B	B	-	B	-	A	A	A	A	B	A	B	A	A	A	A	-	A	A	A	-	A	A	A	A	-	B	A	B	-	-	-	B
*synopGBS916	71.57	2A	TGCAGGTAACCAACGGCCCAGTGTAGCGCGGGCGCCCCCCTGGGGCGATCGGTCAGGTGGTAA	C/G	0	12111	-1	34	3	87	95	12	0.909091	A	B	-	B	B	A	B	A	A	-	A	A	-	A	B	A	A	A	A	B	A	-	-	-	-	A	-	-	B	B	A	B	B	B	-	B
*synopGBS980	72.4	2A	TGCAGGTCTGGTCAAGAACGGCGCAATCCCTGGGAAGCCCGTTCAATCCCTGGGAAACCCATT	A/G	0	12523	-1	56	1	81	84	7	0.84492	A	B	-	B	B	-	-	-	-	-	A	-	B	A	B	A	A	A	A	A	A	A	A	B	A	A	-	-	B	B	A	-	B	B	-	-
*synopGBS157	85.43	2A	TGCAGACGGCCATCAGCTTTGTGTCCTCCGCAAGGGCGTCCATGAGAGAAGATGACATGAGGA	G/A	0	1443	-1	37	2	76	104	12	0.898396	A	B	A	B	B	B	B	A	A	-	A	B	B	-	B	A	A	B	A	A	A	-	A	B	A	A	-	B	B	B	B	B	B	B	-	B
*synopGBS159	85.43	2A	TGCAGACGGTCATCAGCTTTGTGTCCTCCGCAAGGGCATCCATGAGAGAAGATGACATGAGGA	A/G	0	1460	-1	37	1	104	75	12	0.893048	A	B	A	B	B	B	B	A	A	-	A	B	B	-	B	A	A	B	A	-	A	-	A	B	A	A	-	B	B	B	B	B	B	B	-	B
*synopGBS553	86.24	2A	TGCAGCTAGGTTGGCGATGAGGCCGCTGGTGCAATTGTTGGATCCGATGGCCTGGAGAAGCTG	A/C	0	7910	-1	32	3	83	100	14	0.903743	A	B	A	B	B	-	B	-	A	-	A	B	B	-	B	-	A	B	A	-	A	-	-	B	A	A	-	B	B	B	-	B	B	B	-	B
*synopGBS1428	87.12	2A	TGCAGTTGATTACACATGTACGGAGCTTTCTTCAGGGTGCTGCAAAAGGAAAGCGATGAACGC	C/T	0	16018	-1	20	3	90	75	11	0.823529	A	B	-	B	B	A	B	-	A	-	A	B	-	A	B	B	A	B	A	B	A	-	-	-	A	A	B	-	B	B	B	B	B	B	-	-
*synopGBS605	87.12	2A	TGCAGCTGAAGCCTGAAAACGAGTTGCTAGACGCGGCACTGGGACATAGTAGGAACCAAGGGC	A/G	0	8566	-1	18	3	85	88	14	0.850267	A	B	-	B	B	A	B	-	A	-	A	B	B	-	B	B	A	B	A	-	A	-	-	B	A	A	-	-	B	B	B	B	B	-	A	-
*synopGBS266	87.98	2A	TGCAGATCTGTTCTGCCAGTTTCCCCCTTTGTGTGTTCACGATTCGGTTCCACGAGCGTCTAA	G/A	0	2810	-1	32	3	98	80	10	0.898396	A	B	B	B	B	A	B	-	A	-	A	B	-	-	B	-	A	B	A	A	A	A	-	-	A	A	-	B	B	-	-	B	B	B	A	B
*synopGBS898	92.18	2A	TGCAGGGGAATTCACAAAATAATACCTTCATGTCCAGGCGCTGCTCCATCATGAGGAGCACAG	A/C	0	11833	-1	15	3	91	84	11	0.877005	A	B	-	B	B	A	B	A	A	-	B	-	B	-	B	A	A	B	-	-	A	-	-	B	A	A	-	A	-	B	B	B	B	B	A	B
*synopGBS550	96.22	2A	TGCAGCTAGGGATGCGATGCTGACAATGATGCTTCAAATTATGTCGCAAGACGACCGACCGAT	C/G	0	7894	-1	5	3	79	101	13	0.893048	A	B	-	-	B	A	B	-	A	-	-	B	B	-	B	A	A	A	A	B	A	B	-	B	A	A	B	B	B	B	B	B	B	B	A	B
*synopGBS1073	97.97	2A	TGCAGTACCTCCGTACCATGATGTCGAGCTCATTGATCGACTCGGGTCCCACGATGTCGTCCC	C/T	0	13363	-1	10	3	83	74	5	0.812834	A	B	A	B	B	A	B	A	A	-	-	B	-	A	B	-	A	-	A	B	-	B	-	B	A	A	A	B	B	B	B	-	B	B	A	-
*synopGBS129	97.97	2A	TGCAGACCGACCCGCTTCCTCCTCAGTGTCTCGATCTCTTCGACTGGCCACTGCACCAGCCGC	C/T	0	1249	-1	7	1	74	99	15	0.84492	A	B	-	B	B	-	B	-	A	-	B	B	B	-	B	A	-	A	A	B	-	B	-	-	A	A	-	B	B	B	-	B	B	B	A	B
*synopGBS1065	99.67	2A	TGCAGTACACGGCGAGCAGCCAACAGCGTACCAGCGCGTACACGCTGAAGTTCCTGCAAGTGC	C/G	0	13300	-1	36	2	83	103	12	0.930481	A	B	A	B	B	-	B	-	A	-	B	B	B	-	B	A	A	-	A	A	A	B	-	B	A	A	B	B	B	B	B	B	B	B	A	B
*synopGBS1259	111.2	2A	TGCAGTGATCAAGAATGCTTGCGCGGTTCGATCGACGTCGTCGCTGAGCCCGTCCGTCAAGTC	A/C	0	14732	-1	58	3	89	105	17	0.946524	A	B	-	B	B	-	B	-	A	-	A	B	A	-	B	A	B	A	A	-	A	B	-	B	A	A	A	-	B	B	B	B	B	B	A	B
*synopGBS441	113.9	2A	TGCAGCCCCGAGCCCGCGCCGCCGCTGCCGCCCTCCGCCGCGCCGTTCGCCGCCGACGACCGT	G/T	0	5773	-1	48	3	81	85	14	0.812834	A	B	B	B	B	-	B	-	A	-	A	B	A	A	B	A	B	A	A	-	B	B	-	B	A	A	-	-	B	B	-	B	B	-	A	B
*synopGBS892	113.9	2A	TGCAGGGCGATCCGAACGCGTCTGGACAACAACCGCGCCCGCCCAGTTGAAGCACAACGTGCC	C/T	0	11742	-1	16	3	78	85	12	0.807487	A	B	B	B	B	B	B	B	A	-	A	B	-	-	B	-	B	A	A	-	-	B	-	B	A	A	-	-	B	B	-	-	B	B	A	B
*synopGBS674	114.85	2A	TGCAGGAACCCCGACACATCCTTCTTCTCATCCGTCTCCGTCGCCGCAGCACCAGGCGCATGC	A/C	0	9560	-1	29	3	97	75	12	0.855615	A	B	B	-	B	-	B	B	-	-	A	B	A	-	B	-	B	A	A	A	B	B	B	B	A	A	-	-	B	B	-	B	B	B	A	B
*synopGBS786	116.62	2A	TGCAGGCAGCTGAGGGCGGGGCACGGGCGAGGGCGGCAAGAAAGTTGTTCAGCTTGCGTACTG	C/T	0	10622	-1	9	3	101	73	13	0.860963	A	B	B	B	B	-	B	B	-	B	-	B	-	-	B	-	B	A	A	-	-	B	B	B	A	A	-	-	B	B	-	B	B	B	A	B
*synopGBS180	118.56	2A	TGCAGAGAGAAGCGACGGGGAAGACAAGACCAACCGACACAAGTGCCGCTCCTTCCTTCCTTT	C/G	0	1746	-1	24	3	73	88	11	0.802139	A	B	-	B	B	-	B	-	A	-	A	B	A	-	B	-	B	A	A	-	B	B	A	B	A	A	-	A	B	B	-	B	B	B	A	B
*synopGBS291	118.56	2A	TGCAGATGGAGCATCAATCTCCTCCGCTTTTCTTGAAGCAACCGCAACCTGGTGCCCCCGAAG	C/T	0	3022	-1	55	3	74	93	13	0.823529	-	B	-	B	B	B	B	-	A	-	-	B	A	-	B	-	B	A	A	A	B	B	A	-	A	A	B	A	B	B	-	B	B	-	A	B
*synopGBS292	118.56	2A	TGCAGATGGAGCATCAATCTCCTCCGCTTTTCTTGAAGCAACCGCAACCTGGTGCCCCCGAAG	A/C	0	3023	-1	61	3	74	93	13	0.823529	-	B	-	B	B	B	B	-	A	-	-	B	A	-	B	-	B	A	A	A	B	B	A	-	A	A	B	A	B	B	-	B	B	-	A	B
*synopGBS483	118.56	2A	TGCAGCCTGAATCCCAGCATTGAAAGCCCCCTCCCCTCTCCAAGCTCCATCGCAGCACTAGTG	C/G	0	6488	-1	40	1	78	89	11	0.834225	A	B	-	-	B	-	B	-	A	-	A	B	A	A	B	-	B	A	A	-	B	B	-	B	A	A	-	-	B	B	B	B	B	B	A	B
*synopGBS884	118.56	2A	TGCAGGGCAAACCCTTTTTTTCCGCCAGATCCAATGGCCCACGCGGCTCAAATCCAACGGCCC	C/T	0	11637	-1	57	3	73	90	9	0.823529	A	B	B	B	B	B	B	B	-	-	A	B	A	-	B	-	B	A	A	B	B	B	A	B	A	A	-	-	B	B	-	-	B	B	-	B
*synopGBS994	119.48	2A	TGCAGGTTCACCAATGCAGATTACAAGAAGCTACAAAGAATCAGCGAGACCCCCACCACGTAT	C/T	0	12870	-1	51	1	69	92	8	0.818182	A	B	-	B	B	B	B	B	A	A	-	B	A	-	B	-	B	A	-	A	B	B	A	B	A	-	B	A	B	B	B	-	B	B	-	B
*synopGBS1064	120.3	2A	TGCAGTACACGAACCAGGACTTGTCTTCCCTGTTCGCCTCTCCGTCTATTTCTCCTGTTCGCC	C/G	0	13298	-1	24	1	91	100	14	0.946524	A	B	-	B	B	-	B	-	-	A	A	B	A	-	B	B	B	A	A	B	B	B	A	B	A	A	-	A	B	B	B	-	B	B	A	B
*synopGBS1329	120.3	2A	TGCAGTGTCCAAAGGAACTACATCTCACGCCCCAGGCAGCAGCCCAAGCTGCCTGGGGCGGAC	A/G	0	15323	-1	40	3	79	98	14	0.871658	A	B	B	B	B	-	B	-	A	A	A	B	-	-	B	-	B	A	A	-	B	B	A	B	-	A	-	-	B	B	B	B	B	B	-	B
*synopGBS820	121.14	2A	TGCAGGCCTTAACTAAGCTCCGCCGCTAGCCCAAACATTTCTTCCATCATCCGTGGCTCCCGC	A/G	0	10963	-1	33	3	74	91	11	0.823529	A	B	-	B	B	-	B	-	A	-	A	B	A	-	B	-	B	A	A	-	B	B	A	-	A	A	-	-	B	B	B	B	B	B	A	B
*synopGBS1328	122.03	2A	TGCAGTGTCCAAAGGAACTACATCTCACGCCCCAGGCAGCAGCCCAAGCTGCCTGGGGCGGAC	A/G	0	15322	-1	15	3	79	98	14	0.871658	A	B	B	B	B	-	B	-	A	A	A	B	-	-	B	-	B	A	A	-	B	B	A	B	-	A	-	-	B	B	B	B	B	B	-	B
*synopGBS179	122.03	2A	TGCAGAGAGAAGCGACGGGGAAGACAAGACCAACCGACACAAGTGCCGCTCCTTCCTTCCTTT	A/G	0	1745	-1	5	3	73	88	11	0.802139	A	B	-	B	B	-	B	-	A	-	A	B	A	-	B	-	B	A	A	-	B	B	A	B	A	A	-	A	B	B	-	B	B	B	A	B
*synopGBS44	122.03	2A	TGCAGAACCTTGTTCTCTTACTCGGCCCTTCATATGGTGCCTTGTCCCTGCTGTTTGTAGGCC	T/C	0	444	-1	37	3	99	81	15	0.882353	A	B	B	B	-	A	B	B	A	-	A	B	A	A	B	-	B	A	-	A	B	B	A	-	A	A	-	-	B	B	-	B	B	B	A	B
*synopGBS45	122.03	2A	TGCAGAACCTTGTTCTCTTACTCGGTCCTTCATATGGCGCCTTGTCCCTGCTGTTTGTAGGCC	C/T	0	445	-1	37	1	81	99	15	0.882353	A	B	B	B	-	A	B	B	A	-	A	B	A	A	B	-	B	A	-	A	B	B	A	-	A	A	-	-	B	B	-	B	B	B	A	B
*synopGBS1304	1.77	2B	TGCAGTGCTGTTTCACCAAGGAGGTGTGGTGTCAAATTCAGAGAACGCAAAGCACATTGTGCG	A/G	0	15042	-1	14	3	66	96	6	0.834225	A	B	A	-	A	A	B	B	A	-	B	B	B	A	B	B	B	A	A	B	-	B	B	B	B	B	A	B	B	B	-	-	B	-	-	A
*synopGBS764	2.58	2B	TGCAGGCACACACGTAGGCTATCTCGTCTAGGACGTCTGTCGCCCATGGCCATGGCGACGCCG	G/T	0	10495	-1	47	3	70	100	5	0.882353	A	B	-	A	A	A	-	B	-	A	B	B	B	A	B	B	B	A	A	B	B	B	B	B	B	B	A	B	B	-	A	B	B	B	-	A
*synopGBS765	2.58	2B	TGCAGGCACACACGTAGGCTATCTCGTCTAGGACGTCTGTCGCCCATGGCCATGGCGACGCCG	G/A	0	10496	-1	59	3	70	100	5	0.882353	A	B	-	A	A	A	-	B	-	A	B	B	B	A	B	B	B	A	A	B	B	B	B	B	B	B	A	B	B	-	A	B	B	B	-	A
*synopGBS978	4.18	2B	TGCAGGTCTGGCCCGAAGCAGAGGAGAAGGCACGCCTCGGCGGCCGCAATTGGGAAGGCAGCG	A/C	0	12519	-1	16	3	102	68	9	0.860963	A	B	A	-	A	A	B	-	-	A	B	B	B	A	B	B	B	-	A	-	B	B	B	B	B	B	-	B	B	B	A	A	B	B	A	A
*synopGBS1199	10.79	2B	TGCAGTCGGAGAAGATTCGCAGAACATCAAGCAGAGTCGTGGGGGAGCGACAACCACGAAAAG	C/T	0	14341	-1	6	3	68	91	5	0.823529	A	B	-	A	A	-	-	-	A	B	B	-	A	A	B	B	-	-	A	B	-	B	-	B	B	B	A	B	B	B	A	A	B	B	A	A
*synopGBS1215	10.79	2B	TGCAGTCTATCTAATCTAAAACTAAACATTTGGTTGAACAAACATGCTTGCCCTCGACCCGAC	A/G	0	14456	-1	18	3	71	104	9	0.887701	A	B	A	A	-	A	B	B	A	B	-	B	A	-	B	B	B	A	A	B	B	B	B	B	B	B	-	B	B	B	-	A	B	B	-	-
*synopGBS328	11.64	2B	TGCAGATTTGGATTCAGCCAGAATCTCCGAAGCAGCTCGTTGCTATGTTCAGAAACCTGACCT	C/T	0	3390	-1	37	2	82	75	3	0.823529	A	B	A	-	A	A	-	B	A	-	-	B	A	A	B	B	B	A	A	-	-	B	B	-	B	B	-	B	B	B	A	A	B	-	-	A
*synopGBS329	11.64	2B	TGCAGATTTGGATTCAGCCAGAATCTCCGAAGCAGCTCGTTGCTATGTTCAGAAACCTGACCT	C/T	0	3391	-1	42	2	82	75	3	0.823529	A	B	A	-	A	A	-	B	A	-	-	B	A	A	B	B	B	A	A	-	-	B	B	-	B	B	-	B	B	B	A	A	B	-	-	A
*synopGBS695	11.64	2B	TGCAGGACAGAATAAGCCAGTGTCCATCGATTGGTTGACATATGGACCTGATTGGACACAATA	A/G	0	9781	-1	45	1	68	108	6	0.909091	A	B	A	A	-	A	B	B	A	B	B	B	A	A	B	B	B	A	A	B	B	B	-	B	B	B	A	B	B	B	A	A	B	B	A	A
*synopGBS758	12.49	2B	TGCAGGCAACAGCGGCGGAGCCAACGGACTGCCGTTGGGTTCAGTTGAACCCAACAAAACTTG	C/T	0	10451	-1	9	3	80	80	7	0.818182	A	B	A	A	A	-	-	B	A	-	B	B	A	A	B	B	-	A	A	-	B	B	B	B	B	B	A	B	-	B	A	A	B	B	A	A
*synopGBS759	12.49	2B	TGCAGGCAACAGCGGCGGAGCCAACGGACTGCCGTTGGGTTCAGTTGAACCCAACAAAACTTG	C/T	0	10452	-1	31	3	80	80	7	0.818182	A	B	A	A	A	-	-	B	A	-	B	B	A	A	B	B	-	A	A	-	B	B	B	B	B	B	A	B	-	B	A	A	B	B	A	A
*synopGBS789	17.08	2B	TGCAGGCATAGAGGGACATTGAGTCCGTAGGCCTTCTTCTCGAGGAGCGGGAAGAAGGCTCAT	C/G	0	10659	-1	16	3	78	78	4	0.812834	A	B	A	-	A	A	B	-	A	B	-	B	A	A	B	A	B	A	A	-	B	B	B	B	B	B	A	B	B	B	A	A	B	B	A	A
*synopGBS790	17.08	2B	TGCAGGCATAGAGGGACATTGAGTCCGTAGGCCTTCTTCTCGAGGAGCGGGAAGAAGGCTCAT	T/G	0	10660	-1	18	3	78	78	4	0.812834	A	B	A	-	A	A	B	-	A	B	-	B	A	A	B	A	B	A	A	-	B	B	B	B	B	B	A	B	B	B	A	A	B	B	A	A
*synopGBS791	17.08	2B	TGCAGGCATAGAGGGACATTGAGTCCGTAGGCCTTCTTCTCGAGGAGCGGGAAGAAGGCTCAT	G/A	0	10661	-1	48	3	78	78	4	0.812834	A	B	A	-	A	A	B	-	A	B	-	B	A	A	B	A	B	A	A	-	B	B	B	B	B	B	A	B	B	B	A	A	B	B	A	A
*synopGBS93	17.94	2B	TGCAGACAACATATGGACAATGAGCGCGAAATTTAGCAACGGCACTGTTTGCAAGCCTGAAAC	C/T	0	967	-1	17	3	79	84	4	0.850267	A	B	A	-	A	A	-	B	A	B	A	B	A	-	B	A	B	A	A	-	-	-	B	B	B	B	A	B	B	B	A	A	-	B	A	A
*synopGBS94	17.94	2B	TGCAGACAACATATGGACAATGAGCGCGAAATTTAGCAACGGCACTGTTTGCAAGCCTGAAAC	C/T	0	968	-1	44	3	79	84	4	0.850267	A	B	A	-	A	A	-	B	A	B	A	B	A	-	B	A	B	A	A	-	-	-	B	B	B	B	A	B	B	B	A	A	-	B	A	A
*synopGBS1248	18.84	2B	TGCAGTGACAATGTCGGCAATCAGTCCCTGCACACGCCCACTGTTATGATTGCAGAACCATGA	A/T	0	14648	-1	7	3	100	65	11	0.823529	A	B	A	B	A	-	-	B	A	B	A	B	A	A	B	A	-	A	-	B	B	B	B	B	B	B	-	B	B	-	-	A	B	B	-	-
*synopGBS326	22.32	2B	TGCAGATTGTCCCTTCTCTGTTTAGCCTTAATTTGCCACAGTTGATTAGCCAGTGACAATATG	C/G	0	3331	-1	17	3	91	80	4	0.893048	A	B	A	B	A	A	B	B	A	B	A	B	A	-	B	A	B	A	A	B	B	B	B	B	B	B	A	A	B	B	-	A	B	B	A	A
*synopGBS1254	23.12	2B	TGCAGTGAGCATGGAGGAGGAAGGAAAGCTCACCCCCCTCCTCAAGACGCCACTCGTGCTGGT	C/T	0	14694	-1	32	3	81	86	8	0.850267	A	B	A	-	A	A	B	-	-	B	A	B	A	B	B	A	-	A	A	B	-	-	B	B	B	B	A	A	-	B	-	A	-	B	A	A
*synopGBS1127	38.63	2B	TGCAGTAGTTCGAGTGGTAGAGAACGTTAACTCCCGATCGTGTGGTCCAGAGTTCGAGTCATC	C/T	0	13677	-1	46	3	77	81	4	0.823529	A	B	A	B	A	-	-	B	A	B	A	B	A	B	B	A	B	A	A	-	A	A	B	-	-	B	B	A	B	B	-	A	B	A	-	A
*synopGBS1433	39.51	2B	TGCAGTTGCCAGGAGAAACGTGGCGCGCGCGCACCTGTGCGACGGTCTTTCCTCTGGCCATGG	C/T	0	16049	-1	42	3	84	76	3	0.839572	A	B	-	B	A	A	B	-	-	B	-	B	-	B	B	A	B	A	A	-	A	A	B	A	B	B	B	A	B	-	-	A	B	A	A	A
*synopGBS190	39.51	2B	TGCAGAGCACACACAAATTGCTCACTCACTGCCTCACTGGGTACGGCTCACCAAGCTCAAATG	A/G	0	1851	-1	8	1	76	86	5	0.839572	A	B	-	-	-	A	B	B	A	B	A	B	A	B	B	A	B	A	A	A	A	A	B	A	B	B	B	A	B	B	A	-	B	-	-	A
*synopGBS616	44.15	2B	TGCAGCTGGATTACTCGGCGGAGCCGCAGAGGATCGCCGATTCGACGGGGGTTCCGACGGTGT	C/T	0	8830	-1	37	3	86	78	7	0.839572	A	B	A	-	A	-	B	B	A	-	A	B	A	B	B	A	B	-	A	A	B	A	B	A	B	B	-	A	B	-	A	-	B	A	A	-
*synopGBS1083	45.03	2B	TGCAGTACTACCAGCATTATTATCTCACTTGCCGTTCAGCCCTCCACGGCACGGGCTATGCCA	A/C	0	13409	-1	57	3	80	80	4	0.834225	A	B	A	-	A	-	-	B	A	B	A	B	A	B	B	A	B	A	-	A	-	-	-	A	B	B	B	-	B	B	A	-	B	A	A	A
*synopGBS556	45.03	2B	TGCAGCTAGTGGACGGGGCCCGCCGTCGTCGTCGTTGCTATCTTATCCCTCTCCGTGTATGAC	A/G	0	7932	-1	58	2	87	90	16	0.860963	-	B	A	-	A	A	B	B	A	B	A	B	A	-	B	A	B	-	A	-	B	A	B	A	B	B	B	A	B	-	A	A	-	A	A	A
*synopGBS257	47.97	2B	TGCAGATCGTGCATCGTCGGCTATGGCAATGCCAACACCGCGTGCTGCACAGGGGAGTCAAGC	C/T	0	2750	-1	40	3	82	89	4	0.893048	A	B	A	-	A	A	B	B	A	B	A	B	A	B	B	A	B	A	A	A	B	-	B	A	B	B	B	A	B	-	B	-	B	A	A	A
*synopGBS269	47.97	2B	TGCAGATGAACTGCCCGAGAAGCAGGGGACAGCGCGATCACGCGAGGCGGCGGGGACTCAGCA	A/G	0	2839	-1	23	3	81	85	7	0.850267	A	B	-	-	A	A	B	B	-	B	A	-	A	B	B	A	B	A	A	A	B	-	B	A	B	-	B	A	B	B	-	A	B	-	-	A
*synopGBS283	47.97	2B	TGCAGATGCCCAATGGCCCAGGGCCTATGGCACGCGATGAGCGAGCACTTGTGCATGCCGCGG	C/T	0	2954	-1	18	1	82	86	5	0.871658	A	B	A	B	-	A	B	B	A	B	-	B	A	B	B	A	B	A	A	A	B	-	-	A	B	B	B	A	B	B	-	A	B	-	A	-
*synopGBS428	47.97	2B	TGCAGCCAGCACCTCCGCAAGTCAGAGACGGCGCAGCTGCCGCAGCCAGGGCCAGCCCAAAAC	A/G	0	5416	-1	19	3	74	86	4	0.834225	A	B	A	-	A	A	-	B	A	-	A	B	A	B	B	A	-	A	A	-	-	A	B	A	B	B	B	A	B	-	B	A	B	-	A	A
*synopGBS693	47.97	2B	TGCAGGACAACCTGAGGAGTATGCAAGGCAGGACAGCAGCCCCTGCGGCCAGCAACAACCCCC	T/C	0	9759	-1	19	3	83	82	5	0.855615	A	B	A	B	A	A	B	B	A	B	-	B	-	B	B	A	B	A	-	A	B	A	B	A	B	B	-	A	B	B	-	-	B	-	A	A
*synopGBS716	47.97	2B	TGCAGGAGACGCAAGTTGTAGTTGTGCCTACTAGTGTTGTTTTTGGAGCTTTGGGGATTGGCC	A/G	0	9993	-1	8	1	77	92	4	0.882353	A	B	A	-	A	A	B	B	A	B	A	-	A	B	B	A	B	A	A	A	-	A	B	A	B	B	B	A	B	B	B	A	B	A	A	-
*synopGBS9	47.97	2B	TGCAGAAAAATAACGTGACAAGTGACATGGAGCTCGAGCTACACCACTTACCACGAGGCAGTG	C/G	0	34	-1	41	3	90	67	5	0.812834	A	B	-	-	A	A	-	-	A	B	A	B	A	B	-	A	B	A	A	A	-	-	-	A	B	-	-	A	-	-	-	-	B	-	A	A
*synopGBS1268	48.77	2B	TGCAGTGCACACTGTGCCGAAACGGAAACATCACCAGCAGCTAGCTACGGGGGACGTCGACAC	C/G	0	14793	-1	11	3	81	84	6	0.850267	A	B	-	B	A	A	B	B	-	B	-	B	A	B	B	A	B	A	A	A	B	-	B	A	B	B	B	A	B	B	B	-	B	-	-	A
*synopGBS729	48.77	2B	TGCAGGAGTGCCCAAGTCTCAGGAAAATCACGGTGATCAGCCCCCACCTGCGGAGTTTCACCA	A/G	0	10227	-1	13	3	85	80	5	0.855615	A	B	-	-	A	A	B	B	A	B	A	B	A	B	B	-	B	A	A	A	B	A	B	A	B	B	B	-	-	B	B	A	B	-	-	A
*synopGBS730	48.77	2B	TGCAGGAGTGCCCAAGTCTCAGGAAAATCACGGTGATCAGCCCCCACCTGCGGAGTTTCACCA	G/A	0	10228	-1	21	3	85	80	5	0.855615	A	B	-	-	A	A	B	B	A	B	A	B	A	B	B	-	B	A	A	A	B	A	B	A	B	B	B	-	-	B	B	A	B	-	-	A
*synopGBS812	48.77	2B	TGCAGGCCCTTTGTCTCTATCATGCTCAGCGTGAACTTGGCTCTCACCTCTTTGTCTTTGCGG	C/T	0	10858	-1	26	3	83	82	7	0.84492	A	B	A	-	A	A	B	B	-	B	-	-	A	B	B	A	B	-	A	-	B	A	B	A	B	B	B	-	B	B	-	A	B	A	A	A
*synopGBS813	48.77	2B	TGCAGGCCCTTTGTCTCTATCATGCTCAGCGTGAACTTGGCTCTCACCTCTTTGTCTTTGCGG	G/C	0	10859	-1	61	3	83	82	7	0.84492	A	B	A	-	A	A	B	B	-	B	-	-	A	B	B	A	B	-	A	-	B	A	B	A	B	B	B	-	B	B	-	A	B	A	A	A
*synopGBS893	49.66	2B	TGCAGGGCGTGGAGAACGTCGCCGCAATGGAAGATTGGAGGATAGCACCGAGGGGGATCCGAG	A/G	0	11783	-1	14	3	73	83	2	0.823529	A	B	A	B	A	A	B	B	A	B	-	B	A	B	B	A	B	A	A	A	B	-	B	A	B	B	B	A	B	B	B	A	B	A	A	A
*synopGBS355	53.87	2B	TGCAGCACGAACTTCGGGTTGAGGTCCTTCCACCGCGACGGGACGCTGAGCTCGAGCTCCCGA	C/T	0	4082	-1	5	3	77	102	7	0.919786	A	B	A	-	A	A	-	B	A	B	A	B	A	B	B	A	B	A	A	A	B	A	B	A	B	B	B	A	B	B	B	-	B	A	A	A
*synopGBS987	56.33	2B	TGCAGGTGTGCCTAGAAGGATCGGGGAGGGCTAGACGGAGTCGGAATTGCCGCCGAGGTCACG	A/C	0	12784	-1	15	3	78	80	2	0.834225	A	B	-	B	A	A	B	B	-	B	A	B	A	B	B	A	B	A	A	A	B	A	B	A	B	B	B	A	B	B	B	A	B	A	A	A
*synopGBS256	57.29	2B	TGCAGATCGTAGCACAAATCCGCACCGCACAAGAGCCGTGCATCCTCAAGCCACCGCCACCAC	A/G	0	2745	-1	52	3	84	71	5	0.802139	A	B	A	-	A	-	B	-	A	-	-	B	A	-	B	A	-	-	-	-	B	A	B	A	-	B	B	A	B	B	B	-	B	-	-	A
*synopGBS265	57.29	2B	TGCAGATCTGTTCTGCCAGTTTCCCCCTTCACGAGCGACTAATTCGTGCTAATCGGTGCGGCG	C/T	0	2809	-1	48	3	85	92	6	0.914439	A	B	A	B	A	A	B	B	-	B	A	B	A	B	B	-	B	A	A	A	B	A	B	A	B	B	B	A	B	B	B	A	B	-	A	A
*synopGBS728	58.96	2B	TGCAGGAGGGGCAGAAAAAGAGAGTAAAAGCATGGCCATGGACAGAGCGCAGCACAGCTTGAT	G/T	0	10188	-1	44	3	80	81	6	0.828877	A	B	-	-	A	A	-	B	A	B	-	-	A	B	B	A	A	A	A	-	B	A	B	A	B	B	B	A	B	-	B	A	-	A	A	A
*synopGBS1101	59.78	2B	TGCAGTAGATCAGGCGTTTGTAGCTTGACTGAACGCAATTGAAGTCTTTCCTCATAGTCGGGC	T/G	0	13511	-1	39	3	83	85	2	0.887701	A	B	A	B	A	A	B	B	A	B	A	B	A	B	B	A	-	-	A	A	B	A	B	A	-	B	B	A	B	-	B	A	-	A	A	A
*synopGBS20	60.6	2B	TGCAGAAAGCTATTTTCTTTTGTGCTGAAGTATATTGCTTGTGTCTGAAACAGACCCCTGTCG	A/G	0	196	-1	53	3	83	82	7	0.84492	A	B	A	B	A	A	B	B	A	B	-	B	A	B	-	-	A	A	A	A	B	A	B	-	B	B	B	-	B	-	B	-	B	-	A	A
*synopGBS846	61.47	2B	TGCAGGCTGCATCGTCATTCATAATTGACCACTTTAATCTTGGAAGCCATCAACCATGCCGAT	C/T	0	11362	-1	6	3	73	82	4	0.807487	A	B	A	B	A	A	B	B	A	B	-	B	A	-	B	-	A	A	A	-	B	A	B	-	-	B	B	A	B	B	-	A	B	A	A	A
*synopGBS207	63.1	2B	TGCAGATACCGCAACCTCACCGACTCATTTGTTGTTACAAAGAGAATGTCGGCTGGGATTAGA	G/T	0	2368	-1	21	3	85	89	6	0.898396	A	B	A	B	A	A	B	B	-	B	A	B	A	B	B	A	A	A	A	-	-	A	B	A	B	B	B	A	-	B	B	A	B	A	-	A
*synopGBS880	63.1	2B	TGCAGGGATATTCAGGCATCCGCTTCGAGATCCTGGAGACAGTCGCCACGCTTCTCAACGCCA	C/T	0	11610	-1	55	3	88	88	8	0.898396	A	B	A	B	A	A	B	B	A	B	A	B	-	B	B	A	A	A	A	-	B	A	B	A	B	B	B	A	B	B	B	A	B	A	A	A
*synopGBS1163	63.95	2B	TGCAGTCATAATCTCTCCACATCTCGGTGCAATAACAGTTGAACCCTTTGCAGCGTATAAGAT	A/G	0	13988	-1	10	3	73	80	3	0.802139	A	B	A	-	A	A	-	B	A	B	A	B	A	B	-	A	A	A	-	-	B	-	B	A	B	B	-	A	B	B	B	A	B	-	-	-
*synopGBS1295	63.95	2B	TGCAGTGCGCGTAGCAGTTGAATTGTACTGATCCGAGCATGGCGCCACCCATATAATTGTTGG	C/T	0	14965	-1	63	1	94	81	12	0.871658	A	B	A	B	A	-	B	B	A	B	-	B	-	B	B	-	A	A	A	A	-	A	B	-	B	B	B	A	B	B	-	A	B	A	-	-
*synopGBS879	68.7	2B	TGCAGGGAGGGGCGAGGGAGAAGGCCCAGTTGGCCACGAAATTCGGCATCACGACAGCCAGGG	A/C	0	11589	-1	53	3	76	81	5	0.812834	A	B	A	B	A	A	B	-	-	B	A	B	-	-	B	A	A	A	A	-	B	A	B	A	B	B	A	A	B	-	B	A	B	A	A	A
*synopGBS69	69.58	2B	TGCAGAATCAGGGCTAGGGGGAAGGGAACCTTGACGGACCAGCAGAGAGCGCCCTCGCGGTCG	C/G	0	762	-1	42	1	79	79	2	0.834225	A	B	A	-	B	-	-	B	A	B	-	B	A	B	B	A	A	A	A	A	B	A	B	A	B	B	A	-	B	B	B	A	B	-	A	A
*synopGBS146	70.38	2B	TGCAGACCTTCGCCTGCCTACCTGCCGCCTCCTTGCTACTTCCTCCTCAGGCTTCGTCCCGCC	A/G	0	1325	-1	19	3	88	88	9	0.893048	A	B	A	B	A	A	B	B	A	B	-	B	A	B	B	A	A	A	A	A	B	A	B	A	B	B	A	A	B	B	B	A	B	-	A	A
*synopGBS164	70.38	2B	TGCAGACTAAAAGCGTCTCCGTCGATCCAAAGGCACAATGCAATGCACGTAGACTAGCCTACA	A/C	0	1496	-1	50	1	84	87	7	0.877005	A	B	A	B	A	-	B	B	A	B	-	B	A	B	B	A	A	A	A	A	B	A	B	A	B	B	A	A	B	B	B	-	B	A	A	A
*synopGBS496	71.13	2B	TGCAGCCTTGAAACGGTTGTCTCTGTTACACGCCGTCAGGCCCATCTACTGCTATGCCACAAC	A/G	0	6621	-1	37	3	91	88	8	0.914439	A	B	A	B	B	A	B	B	A	B	-	B	A	B	B	A	A	A	A	A	B	A	B	A	B	B	A	A	B	B	B	A	B	-	-	A
*synopGBS561	71.13	2B	TGCAGCTATCAACTAGCGCGGCGACGATAAACTATTACTGCCATGCGAGCCATGCCATTAAGG	C/T	0	7954	-1	37	2	87	87	8	0.887701	A	B	-	-	B	A	B	B	A	B	B	B	A	B	B	A	A	A	-	-	-	A	B	A	B	B	A	A	B	B	B	-	B	A	A	A
*synopGBS636	72.77	2B	TGCAGCTTCCTGGGGGTGCATCGGTCGTGCGGAGGTGGCCAATGGCCATAACGCGAGGATCGT	C/G	0	9154	-1	18	3	90	81	9	0.86631	A	B	A	-	A	A	-	B	A	-	B	B	A	-	B	A	A	A	A	A	B	A	B	A	B	B	A	A	B	B	B	-	B	A	A	A
*synopGBS798	72.77	2B	TGCAGGCCAAGCCCTCCTCCATCTACAAGTGGTGGCGAGGGGCCACGATGGACGGCGATGGGG	A/G	0	10724	-1	8	3	83	84	8	0.850267	A	B	A	B	A	A	B	-	A	B	-	B	-	B	B	A	A	A	A	A	B	A	B	A	B	B	A	A	B	B	B	A	B	A	-	A
*synopGBS1175	73.63	2B	TGCAGTCCGAAAGAGAGAGAGAGATATTTGATCCATCCCCGTGCACCGTGCGCGCCACGCACG	C/G	0	14155	-1	46	3	75	87	4	0.84492	A	B	-	B	B	A	B	-	A	B	B	-	-	B	B	A	A	A	-	-	B	A	B	-	B	B	-	A	B	-	B	A	B	-	A	A
*synopGBS801	73.63	2B	TGCAGGCCATGATCGTCAAGATAGCGGTGCCCGTGCTGGCCATGCTGCTGCTGCTGCTCACGG	G/C	0	10792	-1	38	2	86	85	7	0.877005	A	B	A	B	-	-	-	B	-	B	B	B	A	B	B	A	A	A	A	A	B	A	B	A	B	B	-	A	B	B	B	A	B	A	-	A
*synopGBS802	73.63	2B	TGCAGGCCATGATCGTCAAGATCGCGGTGCCCGTGCTGCCCATGCTGCTGCTGCTGCTCACCG	C/G	0	10793	-1	38	2	85	81	5	0.860963	A	B	A	B	-	-	-	B	-	B	B	B	A	B	B	A	A	A	A	A	B	A	B	A	B	B	-	A	B	B	B	A	B	A	-	A
*synopGBS1188	74.55	2B	TGCAGTCGAACCACGTCGCCATGGTCGACCTCATCCTTGTGGCCACTACCCCCCCGCCGCCTG	A/G	0	14257	-1	47	3	84	73	7	0.802139	A	B	A	B	A	A	-	-	-	B	B	B	A	-	B	A	A	-	A	A	-	A	B	A	B	B	A	A	B	-	-	-	B	-	-	A
*synopGBS1320	74.55	2B	TGCAGTGGTCGCTGCCGTGCCCTGCTTTTGCATGCACCACGGCTACGGCCAGGCCCTGCTTGT	C/T	0	15220	-1	15	3	81	90	6	0.882353	A	B	A	B	A	A	B	-	A	B	-	B	A	B	B	A	A	A	A	A	B	A	B	A	B	B	A	A	B	B	B	A	B	A	A	A
*synopGBS1456	75.34	2B	TGCAGTTGTGGAGGGGAGAGGATCCAAACAGGGCCTAATTAACCACTTGATCATATCATGATG	A/G	0	16243	-1	25	3	83	89	4	0.898396	A	B	-	B	B	-	-	B	A	B	B	B	A	B	B	A	A	A	A	A	B	A	B	A	B	B	A	A	-	B	-	A	B	A	A	A
*synopGBS13	76.15	2B	TGCAGAAAATGCTTGCTGGGTTGGCCCAGCTAAGCTGGCTTCATTCAAGCCTTGGTTATTTGC	C/G	0	103	-1	62	3	80	82	6	0.834225	A	B	A	-	A	A	B	B	A	B	B	B	-	B	B	A	A	A	A	A	B	A	B	A	B	B	-	A	-	-	B	A	-	A	-	A
*synopGBS788	77.85	2B	TGCAGGCATACTTCCTTCCACGAGGCCAACACTAACATGTGCGTTCTGTTTGGATTGGCCACG	G/A	0	10658	-1	21	2	82	94	9	0.893048	A	B	A	-	-	A	B	B	A	B	B	B	A	B	B	A	A	A	A	A	-	A	B	A	B	B	A	A	B	B	B	-	-	A	A	A
*synopGBS1337	78.67	2B	TGCAGTGTGCAGCATGCAACCTCCCACGTGTTGCGTCAGCGTCAGTCACTGACACCTCCTGCC	A/C	0	15361	-1	37	2	86	80	4	0.86631	A	B	-	B	B	A	B	B	A	B	B	B	A	B	B	A	A	A	A	A	B	A	B	-	B	B	A	A	B	B	B	A	B	B	A	A
*synopGBS162	78.67	2B	TGCAGACGTTTTGGCTTTTGCTGGGGCGTACAAGAGCGATCATTGGGTGTCACCACAAAAACA	G/A	0	1494	-1	27	3	82	85	5	0.86631	A	B	A	-	B	A	B	B	A	B	-	B	A	B	B	A	A	A	-	-	-	A	B	A	-	B	A	-	B	B	B	A	B	B	A	A
*synopGBS163	78.67	2B	TGCAGACGTTTTGGCTTTTGCTGGTGCATACAAGAGCGATCATTGGGCGTCACCACAAAAACA	A/G	0	1495	-1	27	2	85	82	5	0.86631	A	B	A	-	B	A	B	B	A	B	-	B	A	B	B	A	A	A	-	-	-	A	B	A	-	B	A	-	B	B	B	A	B	B	A	A
*synopGBS388	78.67	2B	TGCAGCATGCTACGTGTCAGGCGACACGTACACGTTTCAGGCGCATGCAGTGCAGGGGCACGC	A/G	0	4982	-1	29	3	90	72	7	0.828877	A	B	A	-	B	-	-	B	A	B	-	B	A	B	B	A	A	-	A	A	B	A	B	A	B	B	A	A	B	B	B	A	B	B	-	A
*synopGBS565	78.67	2B	TGCAGCTATGCACCATCGCGTCGCCTCAGTCTCTCGGATGTGTGCGACTTGGTGGGCGGCCAT	C/G	0	7982	-1	34	1	84	91	5	0.909091	A	B	A	-	-	A	B	B	A	B	-	B	A	B	B	A	A	A	A	A	B	A	B	A	-	B	A	A	B	B	-	A	-	-	A	A
*synopGBS651	78.67	2B	TGCAGCTTGTTGTCGTCGTCCTGACGACGATGATACAAGTACTTGTCAAGGCTTCAGTTGGGC	A/C	0	9357	-1	55	1	85	79	3	0.860963	A	B	A	-	B	A	B	B	A	B	B	B	A	-	B	A	A	A	A	-	B	A	B	A	B	-	A	A	-	B	B	A	B	-	-	A
*synopGBS894	78.67	2B	TGCAGGGCTGAGCTTTACACCAACGAAACTCCACCATCAGATCAGCCGTACGAACCCCCGCGG	C/T	0	11800	-1	33	3	80	75	4	0.807487	A	B	A	B	B	A	-	B	-	-	B	B	A	B	B	A	A	A	A	A	B	A	B	A	B	B	A	A	B	B	B	A	B	B	A	A
*synopGBS1231	79.49	2B	TGCAGTCTGGGACCGCCTTGGCAAGATGACAGGGAGCATGCAAAGGAGGGCTCAGGAGGTATT	G/A	0	14531	-1	54	3	91	76	11	0.834225	A	B	-	B	B	A	-	B	-	B	-	B	-	-	-	-	A	A	A	A	B	A	B	A	B	B	A	-	B	-	-	-	B	-	A	-
*synopGBS38	79.49	2B	TGCAGAACATGGCCCGCTTGACGGTAATTGGCTAATTGCTAAGCGCACATTGGACGCTGGTTT	A/G	0	403	-1	6	3	103	81	11	0.925134	A	B	A	B	B	A	B	B	-	B	B	B	A	B	B	A	A	A	A	A	B	A	B	A	B	B	A	-	B	B	B	A	B	B	-	A
*synopGBS779	79.49	2B	TGCAGGCAGAGGAAAGACTTCCCTTTGCCCAGCGTCCGCAACTCATCAGCGCAACCACAACAC	A/G	0	10590	-1	47	3	100	72	6	0.887701	A	B	A	-	B	-	B	B	A	B	-	B	A	B	B	A	A	-	-	-	B	-	B	-	B	B	A	A	B	B	B	A	B	B	-	A
*synopGBS476	81.95	2B	TGCAGCCTCGCCGTGCTCCGCTGCCGCTGGGCTATGCCATGCCCTATTGAGCCGCCTCGGCAT	A/C	0	6435	-1	49	3	90	75	6	0.850267	A	B	A	B	B	A	B	B	A	B	B	B	-	B	B	A	A	A	A	A	B	A	B	A	B	B	A	A	B	B	B	A	B	B	A	A
*synopGBS1352	94.19	2B	TGCAGTTACGTCGCTGAAGCTCAGTCCAGCCAAGGCATCTCCGACAAAGATGGACACGAAGAC	A/C	0	15518	-1	59	3	82	90	4	0.898396	A	B	-	-	B	A	B	B	A	B	-	B	A	B	B	A	A	B	A	A	B	B	B	-	B	B	A	A	B	B	A	-	B	B	A	A
*synopGBS196	94.19	2B	TGCAGAGCATTGGCGACATATGGCGCGTCCACGACATGCGTGCGCAAGAAGACAAGCACGATC	G/C	0	1899	-1	39	2	100	83	9	0.930481	A	B	A	B	B	A	B	B	-	B	B	B	A	B	B	A	A	B	A	A	B	B	B	A	B	B	A	A	B	B	A	A	B	B	A	A
*synopGBS1412	94.98	2B	TGCAGTTGAATCGCAGAGAATCTTGGTTATGCTCTGGAGATCAACAACTGCTCGAAAAATCAG	A/T	0	15967	-1	58	3	84	93	8	0.903743	A	B	A	B	B	A	B	B	A	-	-	B	A	-	B	A	A	-	A	A	B	B	B	A	B	B	A	A	B	B	-	-	B	B	A	A
*synopGBS517	94.98	2B	TGCAGCGTCATAAGAGAGCAAGCACCGTGAAATCTGTTCATGCAGTTGACAGAATATGGCCGC	C/T	0	7496	-1	5	1	88	74	4	0.84492	A	B	A	B	B	A	B	-	A	B	B	B	A	B	B	A	A	B	A	A	-	B	B	A	B	B	A	A	B	-	A	A	B	-	A	A
*synopGBS925	94.98	2B	TGCAGGTAATTCGCATCCATGTTTCATGCAAAGAAAAAGCATCCGTCTTCTTCTCGCGAGTTT	C/T	0	12141	-1	54	3	67	97	6	0.84492	A	B	A	B	B	-	B	B	A	B	B	B	A	B	B	A	A	B	A	-	B	B	B	-	B	B	A	A	B	B	-	-	B	B	-	A
*synopGBS926	94.98	2B	TGCAGGTAATTCGCATCCATGTTTCATGCAAAGAAAAAGCATCCGTCTTCTTCTCGCGAGTTT	G/A	0	12142	-1	55	3	67	97	6	0.84492	A	B	A	B	B	-	B	B	A	B	B	B	A	B	B	A	A	B	A	-	B	B	B	-	B	B	A	A	B	B	-	-	B	B	-	A
*synopGBS927	94.98	2B	TGCAGGTAATTCGCATCCATGTTTCATGCAAAGAAAAAGCATCCGTCTTCTTCTCGCGAGTTT	G/C	0	12143	-1	57	3	67	97	6	0.84492	A	B	A	B	B	-	B	B	A	B	B	B	A	B	B	A	A	B	A	-	B	B	B	-	B	B	A	A	B	B	-	-	B	B	-	A
*synopGBS1092	95.87	2B	TGCAGTAGAAGCATGGCACAGAGCGGGCCCATATGATGGTTGATGGATTTGAGCTCAAATGTC	A/T	0	13481	-1	21	3	83	93	12	0.877005	A	B	-	B	B	-	-	B	A	B	B	B	A	B	B	A	A	B	-	A	-	B	B	A	B	B	A	A	B	B	A	B	B	B	-	A
*synopGBS1093	95.87	2B	TGCAGTAGAAGCATGGCACAGAGCGGGCCCATATGATGGTTGATGGATTTGAGCTCAAATGTC	C/T	0	13482	-1	23	3	83	93	12	0.877005	A	B	-	B	B	-	-	B	A	B	B	B	A	B	B	A	A	B	-	A	-	B	B	A	B	B	A	A	B	B	A	B	B	B	-	A
*synopGBS1094	95.87	2B	TGCAGTAGAAGCATGGCACAGAGCGGGCCCATATGATGGTTGATGGATTTGAGCTCAAATGTC	C/T	0	13483	-1	28	3	83	93	12	0.877005	A	B	-	B	B	-	-	B	A	B	B	B	A	B	B	A	A	B	-	A	-	B	B	A	B	B	A	A	B	B	A	B	B	B	-	A
*synopGBS1367	95.87	2B	TGCAGTTATCATCCAAGTTGAGAATTCCCATATTGCGGCGATTATTCTGAAGTCCCATTGCCC	C/T	0	15587	-1	12	3	82	82	13	0.807487	A	B	A	B	B	A	-	-	A	-	-	B	A	B	-	A	A	B	-	A	-	B	B	A	-	B	A	-	B	B	A	B	-	-	A	-
*synopGBS1368	95.87	2B	TGCAGTTATCATCCAAGTTGAGAATTCCCATATTGCGGCGATTATTCTGAAGTCCCATTGCCC	T/C	0	15588	-1	33	3	82	82	13	0.807487	A	B	A	B	B	A	-	-	A	-	-	B	A	B	-	A	A	B	-	A	-	B	B	A	-	B	A	-	B	B	A	B	-	-	A	-
*synopGBS420	95.87	2B	TGCAGCCACGTGCTCCTCGACGGCATCAGCGCCGCGCTGCTTTGCCGCCTCCGTTGCGCCGAG	C/T	0	5365	-1	8	3	79	85	8	0.834225	A	B	A	B	B	A	B	B	-	B	-	-	A	B	B	A	A	B	-	-	-	B	B	A	B	B	A	A	B	B	A	B	B	B	-	A
*synopGBS669	96.65	2B	TGCAGGAAAGCATGAGTCCAGGTCGACCCAAGTGCACTCAACAGCCATCTCGTATCCAGGAGG	A/C	0	9497	-1	14	3	101	85	11	0.935829	A	B	A	B	B	A	-	B	A	B	B	B	A	B	B	A	A	B	A	A	B	B	B	-	B	B	A	A	B	B	-	B	B	B	-	A
*synopGBS670	96.65	2B	TGCAGGAAAGCATGAGTCCAGGTCGACCCAAGTGCACTCAACAGCCATCTCGTATCCAGGAGG	G/A	0	9498	-1	21	3	101	85	11	0.935829	A	B	A	B	B	A	-	B	A	B	B	B	A	B	B	A	A	B	A	A	B	B	B	-	B	B	A	A	B	B	-	B	B	B	-	A
*synopGBS833	111.55	2B	TGCAGGCTACACATGTAAGATCGTGTGCTTCAAGGCCAAATTTGCAGTGTGCGTCGCCAAACT	A/G	0	11267	-1	37	1	81	101	13	0.903743	A	B	A	A	B	A	B	B	A	B	B	B	A	-	A	A	A	B	A	A	A	B	A	B	B	B	A	A	-	B	A	B	A	B	A	A
*synopGBS544	115.42	2B	TGCAGCTAGCACTTAGCTCCTGCGTGTAATAGCTAGCTGGTTGCTGCACGTACGAGATGGACG	A/C	0	7833	-1	28	3	90	93	9	0.930481	A	B	A	-	B	A	B	B	A	B	B	B	A	B	A	A	A	-	A	-	A	B	A	B	B	B	A	A	B	B	A	B	A	B	-	A
*synopGBS545	115.42	2B	TGCAGCTAGCACTTAGCTCCTGCGTGTAATAGCTAGCTGGTTGCTGCACGTACGAGATGGACG	T/C	0	7834	-1	29	3	90	93	9	0.930481	A	B	A	-	B	A	B	B	A	B	B	B	A	B	A	A	A	-	A	-	A	B	A	B	B	B	A	A	B	B	A	B	A	B	-	A
*synopGBS412	116.25	2B	TGCAGCCAAGGCGAATCATCTACACCCCTCAACGGCCGCATCTCGGCTTTGTCCAGCTTCGGC	G/T	0	5196	-1	12	3	91	86	7	0.909091	A	B	A	A	B	A	-	B	A	B	B	B	A	B	A	A	A	B	A	A	A	B	A	B	B	B	A	A	B	B	A	B	-	-	A	A
*synopGBS134	117.04	2B	TGCAGACCGCTCAACTTTCGCCGAAAGGCTCCTCTAGAGAGGAGAAAGGCAGGGTGGCTGTGT	C/T	0	1274	-1	7	3	84	88	9	0.871658	A	B	A	A	B	A	-	B	A	B	B	B	A	B	-	A	A	B	-	-	A	B	A	B	A	-	A	A	-	B	A	B	A	-	-	-
*synopGBS135	117.04	2B	TGCAGACCGCTCAACTTTCGCCGAAAGGCTCCTCTAGAGAGGAGAAAGGCAGTGTGGCTGCGT	C/T	0	1275	-1	7	1	84	88	9	0.871658	A	B	A	A	B	A	-	B	A	B	B	B	A	B	-	A	A	B	-	-	A	B	A	B	A	-	A	A	-	B	A	B	A	-	-	-
*synopGBS426	117.04	2B	TGCAGCCACTGTGACCTCCTCGACGACAACAACGACCTCGGTATCCTCTTCAGCCTCCTCAGT	A/G	0	5380	-1	27	1	78	78	3	0.818182	A	B	A	-	B	-	-	B	A	B	B	B	A	-	A	-	A	B	A	A	-	B	A	B	A	-	A	A	B	B	A	B	A	B	A	A
*synopGBS1060	156.35	2B	TGCAGTACAACAACCAAACGTCGGGGTTCTCGTTCTCGCCAACATGTCCAGCAAGGACGTGGA	C/T	0	13276	-1	13	3	97	84	9	0.919786	A	B	B	A	B	B	-	A	-	B	B	B	B	-	A	B	A	B	A	B	-	A	A	B	A	B	A	B	B	B	A	-	B	A	A	A
*synopGBS680	156.35	2B	TGCAGGAAGAGGACTCTTTTGATAGCATTAATCTTGACGGGTGCGCTCGTGGTTGGACTCGCG	A/G	0	9623	-1	30	3	67	99	5	0.860963	A	B	B	A	-	-	-	A	A	B	-	-	B	A	A	B	A	-	A	B	A	A	A	-	A	B	A	B	B	-	A	A	B	A	A	A
*synopGBS781	3.23	2D	TGCAGGCAGATTGTCCCTTCTCTCTTTTGGGCTAGATTTGCACAGTTAATTAATCAGCGACAA	C/G	0	10601	-1	54	3	65	91	3	0.818182	A	B	-	-	A	-	-	-	A	-	A	A	-	-	A	-	A	A	A	-	-	-	-	A	A	A	-	-	-	-	A	A	A	A	B	-
*synopGBS1305	8.74	2D	TGCAGTGCTTACCACGTTCAAGCCATGACAGGGCTTGGAGCAAACCACCTTGGTCTCCAATCG	C/G	0	15043	-1	18	3	65	95	7	0.818182	A	B	-	-	A	-	-	-	-	-	A	A	-	-	-	-	A	-	-	-	A	-	-	-	A	A	-	-	-	-	-	A	A	A	B	A
*synopGBS302	10.61	2D	TGCAGATGTGTAGCTGTTTAAAATACTTCTGACTTCCATGTGGTAGGAGGCGCGGCAGCGGAA	C/T	0	3120	-1	63	3	95	63	7	0.807487	A	B	-	-	A	-	-	-	A	-	A	A	A	-	A	-	A	A	A	-	A	-	-	A	-	A	-	-	-	-	A	A	A	-	B	A
*synopGBS248	21.88	2D	TGCAGATCGATCCGTTGGGCATCCCCATTTCACGTGCCCCACCTTACACATGCACGCGTGTCG	C/G	0	2706	-1	42	3	92	66	4	0.823529	A	B	-	-	A	-	-	-	A	-	-	A	A	-	A	-	A	A	A	-	A	-	-	A	A	A	-	-	-	-	A	-	A	A	B	A
*synopGBS5	21.88	2D	TGCAGAAAAAGATACTGTAGCGCCAGCACGTGAGCCCCGCAGATCTTTTGATTGCACATGCTC	C/T	0	22	-1	14	3	69	89	6	0.812834	A	B	-	-	A	-	-	-	A	-	-	A	A	-	A	-	A	A	A	-	-	-	-	A	A	A	-	-	-	-	A	A	A	A	-	A
*synopGBS972	27.77	2D	TGCAGGTCTCGATTGGGGGGTGCGCGCGCAAGATGTAGGCGAGATTGGGGATCATGGGGCTCG	C/T	0	12507	-1	22	3	65	91	4	0.812834	A	B	-	-	A	-	-	-	A	-	A	-	-	-	A	-	A	-	A	-	-	-	-	A	A	A	-	-	-	-	A	A	A	A	-	A
*synopGBS973	27.77	2D	TGCAGGTCTCGATTGGGGGGTGCGCGCGCAAGATGTAGGCGAGATTGGGGATCATGGGGCTCG	C/G	0	12508	-1	39	3	65	91	4	0.812834	A	B	-	-	A	-	-	-	A	-	A	-	-	-	A	-	A	-	A	-	-	-	-	A	A	A	-	-	-	-	A	A	A	A	-	A
*synopGBS221	30.49	2D	TGCAGATCACGACGGACACCCGACCGATCGGCCCATCCTACGTAGAATCGCGTGTGTCGTGGG	C/G	0	2510	-1	23	3	69	96	5	0.855615	A	B	-	-	A	-	-	-	A	-	-	A	A	-	A	-	A	A	A	-	-	-	-	A	A	A	-	-	-	-	-	A	A	A	B	A
*synopGBS941	30.49	2D	TGCAGGTAGTAGCTATCCCTGGAGCGGCGCACCCACGTGTCGTCCCTGGCGGCGGACGAAGCC	A/C	0	12239	-1	14	2	93	67	7	0.818182	A	B	-	-	A	-	-	-	A	-	A	A	A	-	A	-	A	-	A	-	A	-	-	A	A	A	-	-	-	-	-	A	A	-	-	A
*synopGBS110	23.55	2D	TGCAGACAGCTGTAGTACATCATCATGAGCTCGTCGATGGAGTTGCGGGCCGCCTCCGCTACG	A/T	0	1084	-1	21	2	84	93	5	0.919786	A	B	B	-	A	B	B	B	A	B	A	A	A	B	A	B	A	A	A	B	A	B	B	A	A	A	B	B	B	B	A	A	A	A	B	A
*synopGBS1128	23.55	2D	TGCAGTAGTTTGTGTCGGGGGCAAGAAATAGCGAAACGGTTTGCTGCTTCTGTTAGGGTGGAA	C/T	0	13687	-1	15	3	85	78	4	0.850267	A	B	-	B	A	B	B	B	A	B	-	A	-	B	A	B	A	A	A	-	A	B	B	-	A	A	B	B	B	-	A	A	A	-	B	A
*synopGBS1146	23.55	2D	TGCAGTCAACCAGGTTGCCGAACACAACACTACGAGATCACCGAGTAGGACTGGTCTGAATAT	C/T	0	13864	-1	18	3	89	88	5	0.919786	A	B	B	-	A	B	B	B	-	B	A	A	A	B	A	B	A	A	A	B	-	B	B	A	A	A	B	-	B	B	-	A	A	A	B	A
*synopGBS343	23.55	2D	TGCAGCAAGGGCTTCCAAGTCCAAACCGATCATCAGCTCATGGCTTTGGATTGCAGGGCCTTG	C/G	0	3739	-1	25	3	77	83	4	0.834225	A	B	B	B	A	B	B	B	A	B	A	A	A	B	A	B	A	A	A	B	A	B	B	A	A	A	B	B	B	B	A	A	A	A	B	A
*synopGBS666	23.55	2D	TGCAGGAAACCAATTTGCATTGGAAGTTCAATGGGCTGATTAGAGATAGCCAAATGACTGGGG	A/G	0	9481	-1	47	3	79	86	5	0.855615	A	B	B	B	-	B	B	B	-	B	A	A	A	B	A	B	A	-	A	-	A	B	B	-	-	A	B	-	B	B	A	A	A	A	B	A
*synopGBS560	24.32	2D	TGCAGCTATCAACTAGCGCGCGGACGATAAACTATTATTGCCATGCGAGCCATGCCATTAAGG	C/G	0	7953	-1	49	1	83	89	4	0.898396	A	B	B	-	A	B	B	-	A	B	-	A	A	B	A	B	A	A	A	-	A	B	B	A	A	A	B	B	B	B	A	A	A	A	B	A
*synopGBS58	24.32	2D	TGCAGAAGCTGCTTTTGCACTGACGGGATTGGGGTCGTGATGGTACCTTCAATTTGGAATCTT	A/G	0	644	-1	18	2	72	87	5	0.823529	A	B	-	B	A	B	B	B	-	B	-	A	A	B	A	B	A	-	A	B	-	B	B	A	A	-	-	-	B	B	A	A	A	A	B	A
*synopGBS618	25.16	2D	TGCAGCTGGGTTCCGAGTGCTCCAGCAACCGTGCGCTTCTCGTTCGAGAAGGGGCCATCCCTC	T/C	0	8914	-1	10	3	91	98	12	0.946524	A	B	B	-	-	B	-	B	A	B	A	A	A	B	A	B	A	A	A	B	A	B	B	A	-	A	B	B	-	B	A	A	A	A	B	A
*synopGBS632	25.16	2D	TGCAGCTTCAGCAACACTTGCTCGCCGACCTGAAACTGGCGCTCGGGGCGGTTGCGATCTGCC	A/G	0	9101	-1	13	3	72	97	7	0.86631	A	B	-	B	A	B	B	B	A	-	A	A	A	-	A	-	A	A	A	-	A	-	B	A	A	A	B	B	B	-	A	A	A	A	-	A
*synopGBS579	52.59	2D	TGCAGCTCCCTGATCATGGCGAAGATCCTCTTGCCCCTGACGTAGCTGCTCCCGAAGCAGGCC	C/T	0	8192	-1	36	2	74	81	4	0.807487	A	B	B	-	A	B	B	B	A	B	A	-	A	B	A	B	B	A	B	B	B	B	A	A	B	A	B	B	B	-	A	A	B	A	B	A
*synopGBS1212	68.68	2D	TGCAGTCTACGGTCCACCACCACCAACCACCACACTACTATTTTTGGAATTGCACCACACTAC	A/G	0	14434	-1	36	3	83	81	4	0.855615	A	B	B	-	A	B	-	-	A	B	A	A	A	B	A	B	B	-	-	B	-	A	-	-	B	A	B	B	B	-	-	-	-	A	B	A
*synopGBS1310	68.68	2D	TGCAGTGGACGCGGCCCACCGAATGCGCGCCCAGCAGCGCCACCACGGCCTCCGCGCCCAGCC	A/G	0	15077	-1	22	1	75	92	7	0.855615	A	B	B	-	A	B	B	A	A	-	-	A	A	B	A	-	B	A	-	B	-	-	A	A	B	A	B	B	B	B	A	A	B	A	B	-
*synopGBS745	69.52	2D	TGCAGGATGAGAACAGTGTGCTCCGCAACGAAATTCTGGAGCTACAAAAGGAGCTGACGAGGC	G/T	0	10336	-1	60	3	91	70	5	0.834225	A	B	-	-	A	-	-	A	A	B	A	A	-	B	A	B	B	A	B	B	-	A	A	A	B	A	B	-	-	B	A	A	B	A	-	A
*synopGBS250	71.24	2D	TGCAGATCGCCCACACGTTCACGAACACGGTGGTGCCCATCGGCACATCATACCCGAGGACCT	A/G	0	2715	-1	14	3	67	90	5	0.812834	A	B	-	-	-	B	-	A	A	-	A	A	A	B	A	B	B	A	B	B	-	-	A	A	-	A	B	A	B	-	A	A	-	A	-	A
*synopGBS421	71.24	2D	TGCAGCCACTCATCAATTAGTCGTCGGGGAGTACTAGCTAATTAAGCAGGGGGGAATGATTGG	A/G	0	5368	-1	63	3	86	71	7	0.802139	A	B	-	B	A	-	B	A	A	B	-	A	-	-	A	B	-	-	B	-	B	A	-	-	B	A	B	A	B	-	A	A	-	-	-	A
*synopGBS156	86.16	2D	TGCAGACGGAAGTAGACGGTTCCCTCGGAGGCATCGAGACGGAGCGTGGCGATGCCGCGCGCC	A/G	0	1432	-1	38	2	76	90	3	0.871658	A	B	-	-	B	B	B	A	-	B	A	A	A	-	A	B	B	A	B	-	B	A	A	A	B	A	B	A	-	B	A	-	-	A	B	A
*synopGBS171	86.16	2D	TGCAGACTCGCTGTTCGGCCTCATGATCGCATTGCACTACCACATTTCTCAACAACTCGCCGT	C/T	0	1540	-1	60	3	84	90	3	0.914439	A	B	B	B	B	-	-	A	A	B	A	A	-	B	A	B	-	A	B	B	B	A	A	A	B	A	B	A	B	B	-	B	B	-	B	A
*synopGBS756	86.16	2D	TGCAGGCAAAACGACTTTCGCTTGAGGCATGTTGCCAAGCTGAGGCGTGTACTGACCTTGAGA	A/T	0	10425	-1	8	3	91	82	2	0.914439	A	B	B	-	B	B	B	A	A	B	A	A	A	B	A	B	B	A	B	B	B	A	A	A	B	A	B	A	B	B	A	B	B	-	-	A
*synopGBS757	86.16	2D	TGCAGGCAAAACGACTTTCGCTTGAGGCATGTTGCCAAGCTGAGGCGTGTACTGACCTTGAGA	T/A	0	10426	-1	29	3	91	82	2	0.914439	A	B	B	-	B	B	B	A	A	B	A	A	A	B	A	B	B	A	B	B	B	A	A	A	B	A	B	A	B	B	A	B	B	-	-	A
*synopGBS216	86.96	2D	TGCAGATATCGAGTCAGCCTCCTACTCCAGCGGACGGCGAGGCAACATCAACGCCCTCCCCGA	C/T	0	2426	-1	34	2	85	81	4	0.86631	A	B	-	-	B	-	-	A	A	-	A	A	A	B	A	B	B	A	-	B	-	-	A	A	B	A	B	A	B	B	-	-	-	-	-	-
*synopGBS1288	87.74	2D	TGCAGTGCCTTCGGACTCATGCATCTATTTTAGAACTCTCCAAATATTTGGTCACAGATCATC	C/T	0	14935	-1	39	3	71	82	1	0.812834	A	B	-	-	B	B	-	-	-	-	A	-	-	B	A	B	B	-	-	B	B	A	A	A	B	A	B	-	B	B	-	B	B	A	B	A
*synopGBS1434	87.74	2D	TGCAGTTGCCGAGGGATAGGGACTGGAAGTTGGCCTGACTCTTTTGGATGACGACACGTACGC	T/C	0	16060	-1	16	2	84	88	4	0.898396	A	B	B	-	B	B	B	A	A	B	A	A	A	B	A	B	B	A	B	B	B	A	A	A	-	-	B	A	B	B	A	B	B	A	B	A
*synopGBS1436	87.74	2D	TGCAGTTGCCGAGGTACAGGGACTGGAAGTTGGCCTGACTCTTTTGGATGACGACACGTACGC	C/T	0	16062	-1	16	1	88	84	4	0.898396	A	B	B	-	B	B	B	A	A	B	A	A	A	B	A	B	B	A	B	B	B	A	A	A	-	-	B	A	B	B	A	B	B	A	B	A
*synopGBS1286	90.47	2D	TGCAGTGCCTCACTCCATACGACCCGTCTGGCCGTTTCACATCGTCGGATGAGAAAAACCCCT	C/T	0	14926	-1	58	3	78	80	2	0.834225	A	B	B	-	B	B	B	A	-	-	A	A	A	B	A	B	B	A	B	-	-	A	A	A	B	A	A	A	B	-	-	-	B	A	B	A
*synopGBS505	92.27	2D	TGCAGCGATGATCGCAACTAGGGTTTTGCCTGTGGGCGGCGACAGGTCACACGCGGCGTGTTG	C/T	0	6946	-1	12	3	80	74	2	0.812834	A	B	-	B	B	B	B	A	A	B	A	A	A	B	A	B	B	A	B	B	B	A	A	A	B	A	A	A	B	B	A	A	B	A	B	A
*synopGBS929	95.1	2D	TGCAGGTACCAGTCACATGATGCACGGGTGTCTCTGTGTCTGGTCCATAGCTAGGGGCGGGGG	C/G	0	12154	-1	8	3	79	75	1	0.818182	A	B	B	-	B	B	B	-	-	B	-	A	A	B	A	B	B	A	B	A	B	-	A	A	B	A	A	-	A	B	-	A	-	A	B	-
*synopGBS938	104.3	2D	TGCAGGTAGGCCTGTTACCCTGTGTGGTGAACTCAGGCAACTTATGACTGGGGTACGTATGTC	G/T	0	12224	-1	25	3	84	79	1	0.86631	A	B	B	B	B	-	B	A	-	A	A	A	A	B	A	B	B	A	B	A	B	A	A	A	B	B	-	A	A	A	-	A	-	A	B	A
*synopGBS939	104.3	2D	TGCAGGTAGGCCTGTTACCCTGTGTGGTGAACTCAGGCAACTTATGACTGGGGTACGTATGTC	A/T	0	12225	-1	43	3	84	79	1	0.86631	A	B	B	B	B	-	B	A	-	A	A	A	A	B	A	B	B	A	B	A	B	A	A	A	B	B	-	A	A	A	-	A	-	A	B	A
*synopGBS721	0	3A	TGCAGGAGCTATTGTACAGCCAACCGACCTCGTGTCGCGCCACCCTGGGGACCCGTCTGAGGA	A/G	0	10105	-1	62	1	73	81	3	0.807487	A	B	-	-	-	A	B	B	B	A	B	A	B	-	B	B	B	B	A	A	B	B	A	A	A	A	A	A	A	A	B	-	A	-	A	-
*synopGBS743	3.64	3A	TGCAGGATCTTGCGGGGAGGCGCTAGTGTCGCTGGTGGCGTAGTGTCAAGGTGGCGGCATCCA	T/C	0	10323	-1	28	2	95	87	8	0.930481	A	B	B	B	B	A	-	B	-	A	B	A	-	-	-	B	B	B	A	A	B	B	A	A	-	A	A	A	A	A	B	B	A	B	A	-
*synopGBS744	3.64	3A	TGCAGGATCTTGCGGTGAGGCGCTAGTGCCGCTGGCGGCGTAGTGTCAAGGTGGCGGCATCCA	C/T	0	10324	-1	28	2	89	93	8	0.930481	A	B	B	B	B	A	-	B	-	A	B	A	-	-	-	B	B	B	A	A	B	B	A	A	A	A	A	A	A	A	B	B	A	B	A	-
*synopGBS1079	4.4	3A	TGCAGTACGCATCACATGTTGCTGCTATGATCGTAGAAAAATGGAGGCGACAACACATAAGTG	C/T	0	13376	-1	14	3	80	74	4	0.802139	A	B	B	-	B	A	-	-	-	A	B	A	B	-	B	-	B	B	A	A	B	B	A	A	A	A	A	A	A	A	B	-	A	-	A	-
*synopGBS1080	4.4	3A	TGCAGTACGCATCACATGTTGCTGCTATGATCGTAGAAAAATGGAGGCGACAACACATAAGTG	A/G	0	13377	-1	34	3	80	74	4	0.802139	A	B	B	-	B	A	-	-	-	A	B	A	B	-	B	-	B	B	A	A	B	B	A	A	A	A	A	A	A	A	B	-	A	-	A	-
*synopGBS461	4.4	3A	TGCAGCCGCTACACAACCATCCCTCTGCGTCAAGCCATCGTCCATAATTTGCATCTCCCCACC	A/G	0	6169	-1	46	1	85	84	4	0.882353	A	B	-	-	-	A	B	B	-	A	B	A	B	-	B	B	B	-	A	A	-	B	A	A	A	A	A	A	A	A	-	-	A	-	A	B
*synopGBS1029	7.21	3A	TGCAGGTTTCAGTGATACGGTTTGGTCGCACCTTGGATCAAAGAAAGATGATATCTAAACCAC	C/T	0	13046	-1	17	3	101	66	6	0.860963	A	B	B	-	B	-	B	-	B	A	B	A	B	-	-	B	-	B	A	A	B	B	A	-	A	A	A	A	A	A	B	-	-	B	-	-
*synopGBS1030	7.21	3A	TGCAGGTTTCAGTGATACGGTTTGGTCGCACCTTGGATCAAAGAAAGATGATATCTAAACCAC	A/G	0	13047	-1	36	3	101	66	6	0.860963	A	B	B	-	B	-	B	-	B	A	B	A	B	-	-	B	-	B	A	A	B	B	A	-	A	A	A	A	A	A	B	-	-	B	-	-
*synopGBS288	7.21	3A	TGCAGATGGACATGGAGAATTAAGCAATGGAACAGTCGAGCGACGTGCTAGCTAGGCGCGAGG	A/G	0	3010	-1	5	3	102	61	5	0.84492	A	B	B	-	B	A	B	B	-	-	-	-	B	-	B	B	B	B	A	-	B	B	-	-	-	-	A	A	A	A	B	B	A	B	A	-
*synopGBS289	7.21	3A	TGCAGATGGACATGGAGAATTAAGCAATGGAACAGTCGAGCGACGTGCTAGCTAGGCGCGAGG	G/C	0	3011	-1	8	3	102	61	5	0.84492	A	B	B	-	B	A	B	B	-	-	-	-	B	-	B	B	B	B	A	-	B	B	-	-	-	-	A	A	A	A	B	B	A	B	A	-
*synopGBS1318	9.47	3A	TGCAGTGGGCGGGCATCGGCTTTGGCGACTGCGTAGCCTGCGGCGCCAGCGGCGGGCAGGGCC	C/T	0	15187	-1	52	2	89	76	11	0.823529	A	B	B	B	B	A	B	B	B	A	A	-	B	-	A	B	B	B	A	A	B	B	A	-	-	A	A	-	A	A	B	-	A	-	A	-
*synopGBS423	9.47	3A	TGCAGCCACTGCTCCGTCCTGCTGCTGTCGTCGACGCTGTTCCTCATCTCTAACCAGAGCACC	C/G	0	5375	-1	18	3	74	111	5	0.962567	A	B	B	B	B	A	B	B	B	A	A	A	B	-	A	B	B	B	A	A	B	B	A	A	A	A	A	A	A	A	B	B	A	B	A	B
*synopGBS629	9.47	3A	TGCAGCTTCACTGGGCTGACACACGAGCTCCTGGACCATCTCACCATCTATCACATGTCTAAA	A/C	0	9089	-1	60	3	64	101	7	0.84492	A	B	B	-	B	A	B	B	B	A	-	A	B	-	A	B	B	B	A	-	B	-	A	A	A	A	A	-	A	A	B	B	A	-	A	B
*synopGBS630	9.47	3A	TGCAGCTTCACTGGGCTGACACACGAGCTCCTGGACCATCTCACCATCTATCACATGTCTAAA	A/C	0	9090	-1	61	3	64	101	7	0.84492	A	B	B	-	B	A	B	B	B	A	-	A	B	-	A	B	B	B	A	-	B	-	A	A	A	A	A	-	A	A	B	B	A	-	A	B
*synopGBS542	12.62	3A	TGCAGCTAGCACTGGTGCGCCTTAACTAAAAAGCGGCCCGTGATCCATGGAGAGAGACGGCAG	A/G	0	7831	-1	27	3	61	95	2	0.823529	A	B	B	-	-	-	-	-	B	A	-	A	B	-	A	B	B	B	A	A	B	B	A	A	A	-	-	A	A	A	B	B	A	B	-	B
*synopGBS543	12.62	3A	TGCAGCTAGCACTGGTGCGCCTTAACTAAAAAGCGGCCCGTGATCCATGGAGAGAGACGGCAG	A/C	0	7832	-1	50	3	61	95	2	0.823529	A	B	B	-	-	-	-	-	B	A	-	A	B	-	A	B	B	B	A	A	B	B	A	A	A	-	-	A	A	A	B	B	A	B	-	B
*synopGBS580	12.62	3A	TGCAGCTCCGCGTCCAGTGGAGTGGAGGGCGTCGTTGCATGCGCCAGTGAGCTCGTGTCTCGT	C/T	0	8215	-1	10	3	94	76	9	0.860963	A	B	B	-	B	A	B	B	-	A	A	A	B	-	A	B	B	-	-	-	B	-	A	A	A	B	A	A	A	A	-	B	A	B	A	B
*synopGBS706	12.62	3A	TGCAGGACGTTCGGCACCAATGGCGCCTCTACCTCGACAGCGGCAAGCACGGCGCTCGTGCCC	A/G	0	9925	-1	36	3	100	67	7	0.855615	A	B	B	B	-	-	B	B	B	A	-	A	B	-	A	-	B	B	A	A	B	B	A	A	A	B	-	-	A	A	B	B	A	-	-	B
*synopGBS1260	19.24	3A	TGCAGTGATCCCTGAAGGGAAATCCGATGCCGCAGCAAATGCGAGGCACCCAACGGAGAAGAT	A/G	0	14736	-1	14	3	95	72	6	0.860963	A	B	A	-	B	A	B	B	B	A	A	A	-	-	A	A	B	B	A	B	B	-	-	A	A	B	A	B	-	A	-	B	A	B	-	-
*synopGBS1261	19.24	3A	TGCAGTGATCCCTGAAGGGAAATCCGATGCCGCAGCAAATGCGAGGCACCCAACGGAGAAGAT	A/G	0	14737	-1	21	3	95	72	6	0.860963	A	B	A	-	B	A	B	B	B	A	A	A	-	-	A	A	B	B	A	B	B	-	-	A	A	B	A	B	-	A	-	B	A	B	-	-
*synopGBS583	19.24	3A	TGCAGCTCCTAACTGCATTGTTAGGAATAATCTTGTAATCGATGCGTTTCGGTTGTATGCGTG	A/G	0	8230	-1	16	3	74	97	10	0.860963	A	B	A	B	B	A	B	B	B	A	A	A	B	-	A	A	B	B	A	-	B	B	A	A	A	B	A	B	A	A	B	B	A	B	-	-
*synopGBS1048	33.19	3A	TGCAGTAAACACAGGAATGAAGCTAGAATCGGCAAAACCACAATTTGCACGCTTTTGCTATGT	A/G	0	13125	-1	48	3	90	73	8	0.828877	A	B	A	-	B	A	B	B	B	A	A	A	B	-	-	B	B	B	B	-	-	B	A	B	A	B	A	B	A	-	B	B	-	-	-	B
*synopGBS1137	33.19	3A	TGCAGTATGGAGAGTTGGAGACCCACCCAGCGACGTGCGTTGCGTACATGACGCAGTCATGCA	C/T	0	13775	-1	51	1	96	67	9	0.823529	A	B	A	B	-	A	-	B	-	-	A	A	-	-	A	B	B	-	B	B	B	B	A	B	-	B	A	-	-	-	B	B	A	-	-	B
*synopGBS17	34.93	3A	TGCAGAAACTCTTGCCAGAGACCCTGCCACGGGCATGGGTGTTTCTGTTCCTCTTCTGCCTCA	C/T	0	159	-1	8	3	100	68	8	0.855615	A	B	A	-	B	A	B	B	B	A	-	A	B	-	A	B	-	B	B	B	B	B	A	B	A	B	A	-	A	A	B	B	A	-	-	B
*synopGBS793	34.93	3A	TGCAGGCATGACCACATGACCTTCCTGGCCTTGGCGTTCTTGGCGTGGGCGAGCGCAGACTCG	A/G	0	10678	-1	13	3	66	103	9	0.855615	A	B	A	B	B	-	B	-	B	A	-	-	B	-	A	B	B	B	-	-	B	B	A	B	A	B	A	B	A	A	B	B	-	-	A	-
*synopGBS1115	46.19	3A	TGCAGTAGGACCACGAGCATGGCCAGGGCTGCGAGCTTAGCATACGCCATTGCTAAGCCGAAG	A/G	0	13598	-1	41	1	72	95	8	0.850267	A	B	A	-	B	A	A	-	B	A	-	-	-	-	A	B	B	-	B	B	B	B	A	B	-	B	A	B	A	-	B	A	A	A	A	-
*synopGBS25	48.67	3A	TGCAGAAATGGGGCCTGTCCTTGCAGACGCATGTCACAGCAGCATTGCCGTCGTTCGTCACCT	C/G	0	290	-1	58	3	98	74	5	0.893048	A	B	A	B	B	A	A	B	B	A	A	A	B	-	A	B	B	B	B	B	A	B	A	B	B	B	A	-	A	A	-	A	A	-	-	B
*synopGBS26	48.67	3A	TGCAGAAATGGGGCCTGTCCTTGCAGACGCATGTCACAGCAGCATTGCCGTCGTTCGTCACCT	A/G	0	291	-1	59	3	98	74	5	0.893048	A	B	A	B	B	A	A	B	B	A	A	A	B	-	A	B	B	B	B	B	A	B	A	B	B	B	A	-	A	A	-	A	A	-	-	B
*synopGBS318	48.67	3A	TGCAGATTCTGTCGCAGGCAACATGATTAACACCACGGTGATTCTGCACAGCTAGTTAACACC	A/G	0	3247	-1	53	3	92	70	10	0.812834	A	B	-	B	-	A	A	B	-	A	A	-	-	-	A	B	B	B	B	B	A	-	A	B	B	B	A	B	A	-	-	A	A	A	-	B
*synopGBS862	48.67	3A	TGCAGGGAAAAACCAAGTTGCTGTCAATGGACCTTCACGTGCAGCCACTGTCTCAAACGGCAA	C/T	0	11455	-1	20	3	84	90	5	0.903743	A	B	A	B	B	-	A	-	B	A	A	A	B	-	A	B	B	B	B	B	A	B	A	B	B	B	A	B	A	A	-	A	A	A	-	B
*synopGBS863	48.67	3A	TGCAGGGAAAAACCAAGTTGCTGTCAATGGACCTTCACGTGCAGCCACTGTCTCAAACGGCAA	C/G	0	11456	-1	24	3	84	97	12	0.903743	A	B	A	B	B	-	A	-	B	A	A	A	B	-	A	B	B	B	B	B	A	B	A	B	B	B	A	B	A	A	-	A	A	A	-	B
*synopGBS68	53.47	3A	TGCAGAATCAGCAAAAGCATGTACGTCTTGTGCAGCCACGCATGCTGTCTCAATTGGTCGCCA	G/T	0	759	-1	59	3	67	87	4	0.802139	A	B	A	-	B	A	A	B	B	A	-	A	B	-	A	B	B	B	B	B	-	B	-	B	B	B	B	B	A	A	A	A	A	A	A	B
*synopGBS1095	57.93	3A	TGCAGTAGAAGGAAGATGCGTCCTCTTGCTAGGGTTTGGTTCCTCTTGCCATCGTCGATGGGG	A/G	0	13484	-1	50	3	82	76	7	0.807487	A	B	A	-	B	A	A	B	-	A	A	A	-	-	A	-	-	B	B	B	A	-	A	B	B	B	-	-	A	A	A	A	-	-	A	B
*synopGBS1246	57.93	3A	TGCAGTGACAATCCTACACCCGTCCAGAGCCATGGCTGACACTGTGCTTCTCCCTCCTGATTT	A/G	0	14646	-1	17	3	80	93	8	0.882353	A	B	A	B	B	-	A	B	-	A	A	A	B	-	A	B	B	B	-	-	A	B	A	B	B	-	B	B	A	A	A	A	-	A	A	B
*synopGBS1247	57.93	3A	TGCAGTGACAATCCTACACCCGTCCAGAGCCATGGCTGACACTGTGCTTCTCCCTCCTGATTT	G/C	0	14647	-1	26	3	80	93	8	0.882353	A	B	A	B	B	-	A	B	-	A	A	A	B	-	A	B	B	B	-	-	A	B	A	B	B	-	B	B	A	A	A	A	-	A	A	B
*synopGBS232	57.93	3A	TGCAGATCCGAACCGCAAGCTAAGGATGTGGTCGTTCGGTTCAGGGGAATGGTTGTGGATACC	G/C	0	2630	-1	54	3	97	86	14	0.903743	A	B	-	B	-	A	A	B	B	-	A	A	B	-	A	B	B	B	B	B	A	B	A	B	B	B	B	B	A	A	A	A	B	A	A	B
*synopGBS465	57.93	3A	TGCAGCCTATTCTCCAATCCCTTTCAACACCACAACACAAATCGTCTGGATGCGCAGGCGACA	A/G	0	6315	-1	34	3	73	88	8	0.818182	A	B	A	-	B	-	A	B	B	-	A	A	B	-	A	B	B	B	-	B	A	B	A	B	B	B	B	-	A	A	A	A	B	-	A	B
*synopGBS1023	59.75	3A	TGCAGGTTGGTGGTGTGGAGGAGGCAGTGACTGACCTGACGAAGGGGGCACAGGTTCGCAGAT	G/T	0	13005	-1	52	3	92	70	11	0.807487	-	B	A	-	B	-	-	B	B	A	A	A	B	-	A	B	B	-	B	B	-	B	A	B	B	B	B	B	-	A	A	-	B	A	A	B
*synopGBS1155	59.75	3A	TGCAGTCACGGCGCACGCGGGACCAATCCTGTTCATATTCCCCTCGCCCCTGCTGTCACCACT	C/T	0	13932	-1	42	3	81	83	8	0.834225	A	B	A	B	B	A	A	-	B	A	A	A	B	-	A	B	B	-	B	B	A	B	A	B	B	B	-	B	-	-	A	A	B	A	A	-
*synopGBS1462	60.62	3A	TGCAGTTTAACGCAATTCCGAGCGACACCGCCGCCTCGAACACGACAACCCGCGTCCTTCTGC	C/T	0	16284	-1	18	3	71	91	3	0.850267	A	B	A	B	B	-	A	B	B	A	-	A	B	-	A	B	B	B	B	B	A	B	A	B	B	B	B	B	A	A	A	-	B	A	A	B
*synopGBS165	62.33	3A	TGCAGACTAAGGGTGTGTTTGGTTTCTGTCATGAAACGAAACGGTACGGGTCGGTTCCGTCCC	C/T	0	1505	-1	36	3	73	89	7	0.828877	A	B	-	B	-	A	A	B	B	A	A	-	B	A	B	B	B	B	B	B	-	-	-	B	B	B	B	-	-	-	-	A	-	A	A	B
*synopGBS166	62.33	3A	TGCAGACTAAGGGTGTGTTTGGTTTCTGTCATGAAACGAAACGGTACGGGTCGGTTCCGTCCC	A/G	0	1506	-1	38	3	73	89	7	0.828877	A	B	-	B	-	A	A	B	B	A	A	-	B	A	B	B	B	B	B	B	-	-	-	B	B	B	B	-	-	-	-	A	-	A	A	B
*synopGBS167	62.33	3A	TGCAGACTAAGGGTGTGTTTGGTTTCTGTCATGAAACGAAACGGTACGGGTCGGTTCCGTCCC	G/A	0	1507	-1	42	3	73	89	7	0.828877	A	B	-	B	-	A	A	B	B	A	A	-	B	A	B	B	B	B	B	B	-	-	-	B	B	B	B	-	-	-	-	A	-	A	A	B
*synopGBS236	62.33	3A	TGCAGATCCTGGATCTTCTTTTACTAAGCAGGACGCAACTTACACAAATATGCAGGTCGTGCG	C/G	0	2663	-1	57	3	84	91	8	0.893048	A	B	A	-	-	A	A	B	-	A	A	A	B	A	B	-	B	B	B	B	A	B	A	-	-	B	B	B	A	A	A	A	B	A	A	B
*synopGBS60	62.33	3A	TGCAGAAGGGGAAGCAGCGAAATGGTCATATTGTGTGCTCCTTCATGCCAAAGACGCGACACA	A/C	0	669	-1	19	3	99	80	14	0.882353	-	B	-	-	B	A	A	B	-	A	A	A	B	A	B	B	B	B	B	B	-	B	A	B	B	B	B	B	A	A	A	A	B	A	A	B
*synopGBS1024	63.16	3A	TGCAGGTTGTGGTTGCATCGCAGCCGTCGGCGCATTCTCGGCCTGCATCGTCGTAGTCCGCTG	C/T	0	13027	-1	30	2	96	80	7	0.903743	A	B	-	B	B	A	A	B	B	-	-	A	B	A	B	B	B	B	-	B	A	B	A	B	B	B	-	B	A	A	-	A	B	A	-	B
*synopGBS1392	63.16	3A	TGCAGTTCCAGCGTCCTGCATCTGCACCTCCACCACAAGTCAGATTGCCGCACATTCAGTTCG	C/T	0	15755	-1	21	3	91	70	4	0.839572	A	B	A	B	B	A	A	B	B	-	A	A	B	A	B	B	B	B	B	B	A	B	A	B	B	B	-	B	A	A	A	A	B	A	A	-
*synopGBS771	63.16	3A	TGCAGGCACCTCTGGACCAGGAACGACACGGACCTGCCGAGCAGGTCGCTGAGGATCGCGGGC	C/T	0	10530	-1	6	2	79	90	12	0.839572	A	B	A	B	B	-	A	-	B	A	A	A	B	A	B	B	-	B	-	B	A	B	A	-	B	B	-	B	A	A	A	A	-	-	-	B
*synopGBS832	63.16	3A	TGCAGGCGTTTCAATGAGCCACACGCAAGGCGTCACTGATCACCAGCTCACTGCCATACTGAA	C/G	0	11259	-1	35	2	74	94	5	0.871658	A	B	A	B	B	A	A	B	B	A	A	-	B	A	B	B	B	B	B	B	-	B	A	B	B	B	B	B	A	A	A	-	-	-	A	B
*synopGBS1463	64.1	3A	TGCAGTTTAGAAGTCGACGCCGCAGACATATCTATGGCGTGCGTTTGTTAACAGTTCAAGCAA	C/T	0	16308	-1	17	3	89	76	13	0.812834	A	B	-	B	-	A	-	B	B	A	A	-	-	-	B	B	B	B	B	B	-	-	A	B	B	B	-	B	A	A	-	-	B	A	-	-
*synopGBS1464	64.1	3A	TGCAGTTTAGAAGTTGATGCCGCAGACATATCTCTGGCGTGCGTTTGTTAACAGTTCAAGCAA	C/T	0	16309	-1	41	1	76	83	8	0.807487	A	B	-	-	B	A	-	-	-	A	A	-	B	-	B	B	-	B	B	B	-	B	A	-	B	B	B	B	A	A	-	-	-	A	-	B
*synopGBS549	72.37	3A	TGCAGCTAGGCTCAAAACTCAGGCCCAAGCCTGGCCCACGGGCAAGCCCATCGGGCCTAGGCC	C/T	0	7890	-1	29	3	78	79	6	0.807487	A	B	A	-	B	-	-	-	B	A	-	A	-	A	B	-	-	A	-	B	A	B	A	-	B	B	B	-	A	A	-	-	-	-	A	A
*synopGBS109	83.4	3A	TGCAGACAGCGAGGCCATTGCACCAAGACTGCGGTACAGAATGGCAAGTGCCAAGAAAATTTG	A/G	0	1082	-1	39	3	76	89	14	0.807487	A	B	-	B	B	-	-	B	B	A	A	A	B	A	B	B	-	A	-	-	A	B	A	B	B	B	-	B	-	A	A	-	B	-	-	A
*synopGBS928	83.4	3A	TGCAGGTACATCATCAGTACCACTCTACTGGAGCACACATTGCTGCGTCTAGCCTTGTCTAAG	A/G	0	12151	-1	50	3	91	77	9	0.850267	A	B	A	B	B	A	-	B	-	A	-	-	B	A	B	B	B	A	B	B	A	B	A	B	B	-	A	B	A	A	A	A	B	-	A	-
*synopGBS481	84.27	3A	TGCAGCCTCTTCGTCCTGCTCCCCTCCTCGAGCCCTCGTCTGCGCCTTCGCCATGGGCCCGCG	A/G	0	6483	-1	30	2	90	94	15	0.903743	A	B	A	B	-	A	-	B	B	A	A	-	-	-	B	B	B	A	-	B	A	B	A	B	B	B	A	B	A	-	A	A	B	B	A	A
*synopGBS766	91.89	3A	TGCAGGCACACCCACTGCGTGCTCCACTTGGGCACCTTCTTCTGCACCACGTACATCTCCACC	C/T	0	10501	-1	14	3	95	67	5	0.839572	A	B	A	B	B	A	A	A	B	A	B	A	B	A	B	B	B	A	B	B	A	B	A	B	B	B	A	B	A	A	A	-	B	A	A	A
*synopGBS394	93.78	3A	TGCAGCATTAGTTCTTCTTCCACGGTCGATCAGAATCGCACACGAGCAACGTCCTTGATCAAG	A/G	0	5066	-1	57	2	72	87	5	0.823529	A	B	-	-	B	-	A	A	B	A	B	A	-	A	B	B	B	A	B	-	A	B	A	-	B	B	A	-	A	A	A	A	-	A	A	A
*synopGBS1316	100.87	3A	TGCAGTGGCTAGCTACCTGTCTTTACAAGATGGAGATTGCCTGATCGAAACCTACCCGACGGT	C/T	0	15158	-1	51	2	98	68	2	0.877005	A	B	A	-	B	A	A	A	-	A	B	A	B	A	B	B	-	A	B	-	A	-	A	B	B	A	A	B	A	A	A	A	B	A	-	A
*synopGBS633	100.87	3A	TGCAGCTTCCGCACGTGATCATGGATCGTTTCCTGTCCACCTTCCCGACACGCCTTGGCCCAG	A/C	0	9139	-1	47	3	89	83	7	0.882353	A	B	-	-	-	A	A	-	B	A	B	A	B	A	B	B	B	A	B	B	A	-	A	B	B	A	A	B	A	A	A	A	B	A	-	A
*synopGBS1221	117.52	3A	TGCAGTCTCCGCCTTGGGACAGCCCGAGACAAAGTGGGTGGCCGCCCCTCTGAATGCGCCGTC	C/T	0	14474	-1	41	1	63	95	8	0.802139	A	B	-	A	B	B	-	-	B	-	-	-	B	A	A	B	B	-	B	B	B	B	A	B	B	A	A	B	-	A	-	-	B	-	-	B
*synopGBS639	130.94	3A	TGCAGCTTCTCCTAGGCTTAATTTCACTGCGGCTTATGCACAAGCCACAGCTCAAAAGAACTG	A/G	0	9196	-1	13	3	74	82	6	0.802139	A	B	A	A	B	B	A	-	-	A	A	-	-	A	A	-	A	A	B	-	B	B	A	B	A	A	A	B	-	A	A	B	B	-	A	B
*synopGBS655	131.87	3A	TGCAGCTTTCTTTTTTTTCACGCAAGTTTAGAAGGAGGAAGACGACCTGGATCGGGGGCAATC	C/T	0	9393	-1	45	3	76	88	6	0.84492	A	B	A	-	-	-	A	A	-	-	A	A	B	-	A	-	A	A	B	-	-	B	-	-	A	A	A	B	A	A	-	B	-	B	A	-
*synopGBS895	131.87	3A	TGCAGGGCTGATACTGATAGTCTGCATGTTTTTGATCGACAAGAAACAGCACTGAAACTAATT	T/C	0	11801	-1	29	2	77	91	10	0.84492	A	B	A	A	B	B	A	A	-	A	A	-	B	A	-	B	-	A	B	A	B	-	A	B	A	A	-	B	A	A	-	B	B	-	-	B
*synopGBS974	131.87	3A	TGCAGGTCTGATACTGATAGTCTGCATGTCTTTGATCGACAAGAAACAGCACTGAAACTAATT	C/T	0	12514	-1	29	1	91	77	10	0.84492	A	B	A	A	B	B	A	A	-	A	A	-	B	A	-	B	-	A	B	A	B	-	A	B	A	A	-	B	A	A	-	B	B	-	-	B
*synopGBS142	135.41	3A	TGCAGACCTGTTCTTCTCGATCTGGGTCATATGGAAAGAAGGGTCGCGATCCGAAGAAAAAAG	A/T	0	1320	-1	39	3	84	80	2	0.86631	A	B	A	-	B	B	A	A	A	-	-	A	B	-	A	A	A	A	B	A	B	B	A	B	A	A	A	B	A	A	-	-	B	B	A	B
*synopGBS143	135.41	3A	TGCAGACCTGTTCTTCTCGATCTGGGTCATATGGAAAGAAGGGTCGCGATCCGAAGAAAAAAG	A/G	0	1321	-1	61	3	84	80	2	0.86631	A	B	A	-	B	B	A	A	A	-	-	A	B	-	A	A	A	A	B	A	B	B	A	B	A	A	A	B	A	A	-	-	B	B	A	B
*synopGBS1133	141.2	3A	TGCAGTATCTCAGACTCGATGGGCTTCACCCGCTCCAGAACCTTCGGCGTGCTCATAAATCAG	C/T	0	13745	-1	60	2	90	82	15	0.839572	A	B	-	A	B	B	-	A	A	A	-	A	-	A	A	A	A	A	B	A	B	-	A	B	A	-	A	B	A	-	-	B	B	B	-	-
*synopGBS557	141.2	3A	TGCAGCTAGTTGTCTTCAACCTCGAGCCAGGAACCAGGATCGTCTCCGAGAGCTGCCACTTGC	C/T	0	7940	-1	22	3	90	77	3	0.877005	A	B	A	-	B	B	A	A	A	-	A	A	B	A	A	A	A	A	B	A	B	B	A	B	A	A	A	B	-	B	A	B	B	B	-	B
*synopGBS640	141.2	3A	TGCAGCTTCTCCTCACCGCCGCCGTCGCGGTCGTCTTCGTCAGGGGCCGCGCCATACCCCACT	C/T	0	9197	-1	22	3	83	82	3	0.86631	A	B	A	-	-	B	A	-	A	A	A	A	-	-	A	A	A	A	B	A	B	B	A	B	A	A	A	B	A	-	A	B	-	B	A	-
*synopGBS668	141.2	3A	TGCAGGAAACTGTCTGGGATGCTGACATTGTGGTGAATGGGCTGTCGTCCACCAAGAAAAGGA	A/G	0	9491	-1	62	1	82	87	7	0.86631	A	B	A	-	B	B	A	A	-	A	A	A	-	A	A	A	A	A	B	A	B	B	A	B	A	A	-	-	-	-	-	B	B	B	-	B
*synopGBS359	142.06	3A	TGCAGCACGGGCAACAATTGTCCGAATCGTCCAAAGCATGGCCAAACAGACGACCCAGGGCTC	A/G	0	4149	-1	44	3	80	76	4	0.812834	A	B	A	-	B	B	A	-	A	A	A	A	B	A	A	A	A	A	B	A	B	B	A	B	A	A	A	B	A	-	A	B	B	B	A	B
*synopGBS144	152.89	3A	TGCAGACCTTAGGCCTTCCTTGCGAGCGATCCATTGGTCCCTTTGTATCTGAATGTTTGTACC	G/T	0	1323	-1	23	2	93	73	6	0.855615	A	B	A	A	A	A	-	A	A	A	-	A	A	-	A	A	A	-	-	-	B	-	A	A	A	A	A	B	A	B	-	B	-	-	A	B
*synopGBS145	152.89	3A	TGCAGACCTTAGGCCTTCCTTGCGAGCGATCCATTGGTCCCTTTGTATCTGAATGTTTGTACC	G/A	0	1324	-1	25	2	93	73	6	0.855615	A	B	A	A	A	A	-	A	A	A	-	A	A	-	A	A	A	-	-	-	B	-	A	A	A	A	A	B	A	B	-	B	-	-	A	B
*synopGBS450	153.73	3A	TGCAGCCCTCGCCGTACTTGAAACCTAATCCACACTTCATCTCGATGTTGCTTCTTACTCATG	A/G	0	5923	-1	31	3	70	92	4	0.84492	A	B	A	-	B	A	A	A	A	A	A	-	A	A	A	-	A	A	B	A	-	B	A	A	A	A	A	-	A	B	-	B	B	B	A	B
*synopGBS451	153.73	3A	TGCAGCCCTCGCCGTACTTGAAACCTAATCCACACTTCATCTCGATGTTGCTTCTTACTCATG	T/C	0	5924	-1	48	3	70	92	4	0.84492	A	B	A	-	B	A	A	A	A	A	A	-	A	A	A	-	A	A	B	A	-	B	A	A	A	A	A	-	A	B	-	B	B	B	A	B
*synopGBS1124	154.57	3A	TGCAGTAGGTCGGGGGACCATCCAATCAGATCTCCACTAAACGGACGGAACTAGCAGCAAGAG	G/C	0	13630	-1	13	2	82	75	4	0.818182	A	B	-	A	B	-	A	A	A	-	A	A	-	-	A	-	A	A	-	-	-	B	A	A	A	A	A	B	-	B	-	B	B	B	A	B
*synopGBS702	159.58	3A	TGCAGGACGCGACCATGGCCATGGCAGCCCAAGGACAGAAGCACGAGGTCCAGATCACGTTGC	C/T	0	9892	-1	7	3	89	91	8	0.919786	A	B	-	A	B	A	A	A	A	A	-	A	A	A	A	A	A	A	B	A	B	B	A	A	A	A	A	B	A	B	A	-	B	B	-	B
*synopGBS86	163.06	3A	TGCAGAATTATAAAAGGACTTCCAGCACAGGAAATCAACACGGTACAAATGCTAGGTCCTTCA	G/A	0	885	-1	41	3	82	75	4	0.818182	A	B	A	-	B	-	A	A	-	A	A	A	A	-	A	A	A	A	-	-	-	B	B	A	A	A	A	B	A	B	A	B	-	-	-	B
*synopGBS87	163.06	3A	TGCAGAATTATAAAAGGACTTCCAGCACAGGAAATCAACACGGTACAAATGCTAGGTCCTTCA	T/C	0	886	-1	52	3	82	75	4	0.818182	A	B	A	-	B	-	A	A	-	A	A	A	A	-	A	A	A	A	-	-	-	B	B	A	A	A	A	B	A	B	A	B	-	-	-	B
*synopGBS198	196.48	3A	TGCAGAGCTAGTACACTGGAAAGCAGGGGCATAGCTCAGCCATGCGCACAACTGCATTTCCTG	C/G	0	1949	-1	59	3	80	73	3	0.802139	A	B	A	A	A	A	A	B	-	B	A	B	A	A	A	A	-	A	B	A	B	A	B	A	A	A	A	B	A	B	A	B	B	-	A	-
*synopGBS607	197.42	3A	TGCAGCTGATGCAGGAGGGGGAGGGACGGGGGAGCGCTGCATCGAGCGCCTGCTTCTGCCGAG	C/T	0	8619	-1	48	3	78	75	3	0.802139	A	B	-	-	A	-	A	B	A	-	A	B	A	-	A	A	-	A	B	A	-	A	B	A	A	A	A	B	A	B	-	B	B	B	A	B
*synopGBS88	201.88	3A	TGCAGAATTGTCTTTGGAGACCCAGGCTGGCAGGGATTCAGTTCCTGGTAGTAATATATCCAG	C/T	0	921	-1	26	2	83	90	9	0.877005	A	B	A	A	A	-	A	B	-	B	A	-	A	-	A	A	B	A	B	A	B	A	B	A	A	A	A	-	A	B	A	B	A	-	A	B
*synopGBS1045	206.27	3A	TGCAGGTTTTTGAGCTCCAGTCTGTCCGTCGGGAACATGTCGGCGACCACGTCCATGACGGAC	C/T	0	13100	-1	52	1	78	93	3	0.898396	A	B	A	A	A	A	A	-	A	B	A	B	A	A	A	A	B	A	B	A	B	A	B	A	A	A	A	B	A	B	A	B	A	B	A	B
*synopGBS39	206.27	3A	TGCAGAACCAAAAAACAACAAGAACAAAGGAATGACACGAGAAAAAGAAGGAGCACTACTAGG	A/G	0	411	-1	25	3	65	89	3	0.807487	A	B	A	A	A	-	A	B	A	B	-	B	A	A	A	A	B	A	B	A	-	A	B	A	A	A	A	B	A	-	A	B	A	B	A	-
*synopGBS40	206.27	3A	TGCAGAACCAAAAAACAACAAGAACAAAGGAATGACACGAGAAAAAGAAGGAGCACTACTAGG	T/C	0	412	-1	32	3	68	86	3	0.807487	A	B	A	A	A	-	A	B	A	B	-	B	A	A	A	A	B	A	B	A	-	A	B	A	A	A	A	B	A	-	A	B	A	B	A	-
*synopGBS172	207.07	3A	TGCAGACTGAGCGGGCAGCTGAAGCCAAGGTTCCACTTGTTTCGGGGAACAACATTATCAAGC	A/G	0	1563	-1	34	2	87	85	4	0.898396	A	B	A	A	A	A	A	-	A	B	-	B	A	A	A	A	B	A	B	A	-	A	B	A	A	A	A	B	A	B	A	B	A	B	-	B
*synopGBS842	0	3B	TGCAGGCTCCCAGTGTGCTGGCGTAGCACATGAGGTCGTCCAGGCCGTTGGCGATATGGCCGA	C/G	0	11306	-1	40	3	89	76	8	0.839572	A	B	B	B	B	A	B	-	-	B	-	A	A	B	B	A	-	A	A	A	B	B	A	A	B	B	A	A	A	-	-	-	-	A	A	-
*synopGBS1139	0.9	3B	TGCAGTATGTAGATTACACGCACACATACATAGTCGAGACAACACGCCACGTTACACCCTATA	A/T	0	13787	-1	36	3	79	83	9	0.818182	A	B	B	B	B	A	B	A	-	B	A	-	A	B	-	A	A	A	A	A	-	B	A	-	B	B	A	A	A	A	A	A	B	A	-	A
*synopGBS1311	0.9	3B	TGCAGTGGACTCAGCAGCTGTGTTGTGGGGATGAGAGAAGAGGAGACTTTGCCTCTCTTCTTA	C/T	0	15078	-1	17	3	93	77	8	0.86631	A	B	-	B	B	-	B	A	A	B	-	A	A	B	B	A	A	A	A	A	B	B	-	A	B	B	A	-	-	-	-	A	B	A	A	-
*synopGBS1388	0.9	3B	TGCAGTTCATTTGAAAAAAGAAATTGATCAAGCATGGAATCTGATACTGATGCTCTTATTTGA	A/G	0	15732	-1	29	3	81	78	6	0.818182	A	B	-	-	-	-	-	A	-	B	-	-	A	B	B	A	A	-	A	-	B	B	A	A	B	B	A	A	A	A	-	A	B	A	-	A
*synopGBS1470	0.9	3B	TGCAGTTTCTCTTAATCGTCGAGCGAAACTGCTCCGCTGGGAATTGAAGGCAAGCAATTACTC	C/T	0	16427	-1	19	3	79	92	8	0.871658	A	B	B	-	B	A	B	A	A	B	-	A	A	B	B	-	A	A	A	A	B	B	A	A	B	B	-	A	A	A	A	-	B	-	A	A
*synopGBS1471	0.9	3B	TGCAGTTTCTCTTAATCGTCGAGCGAAACTGCTCCGCTGGGAATTGAAGGCAAGCAATTACTC	A/G	0	16428	-1	27	3	79	92	8	0.871658	A	B	B	-	B	A	B	A	A	B	-	A	A	B	B	-	A	A	A	A	B	B	A	A	B	B	-	A	A	A	A	-	B	-	A	A
*synopGBS275	0.9	3B	TGCAGATGAGGCCATGGACGCAGGCACTGGTCATCCGTTAGGGAGCGGTTGATTTCTTATCGT	A/G	0	2890	-1	5	3	79	79	6	0.812834	A	B	B	-	B	A	B	-	A	B	A	A	A	B	-	A	A	-	-	A	-	B	-	A	B	B	A	A	-	A	A	A	-	A	A	A
*synopGBS276	0.9	3B	TGCAGATGAGGCCATGGACGCAGGCACTGGTCATCCGTTAGGGAGCGGTTGATTTCTTATCGT	T/C	0	2891	-1	37	3	79	79	6	0.812834	A	B	B	-	B	A	B	-	A	B	A	A	A	B	-	A	A	-	-	A	-	B	-	A	B	B	A	A	-	A	A	A	-	A	A	A
*synopGBS804	0.9	3B	TGCAGGCCATTCAAGGGCGAATAGGATTTTGTCATTGTGGCATGCTCCTCCAACCCTCTTCTT	A/G	0	10800	-1	19	3	78	79	4	0.818182	A	B	B	B	B	A	B	A	A	-	A	A	A	B	B	A	A	A	A	-	-	B	A	A	B	B	A	A	A	A	A	A	B	-	A	A
*synopGBS805	0.9	3B	TGCAGGCCATTCAAGGGCGAATAGGATTTTGTCATTGTGGCATGCTCCTCCAACCCTCTTCTT	G/T	0	10801	-1	30	3	78	79	4	0.818182	A	B	B	B	B	A	B	A	A	-	A	A	A	B	B	A	A	A	A	-	-	B	A	A	B	B	A	A	A	A	A	A	B	-	A	A
*synopGBS806	0.9	3B	TGCAGGCCATTCAAGGGCGAATAGGATTTTGTCATTGTGGCATGCTCCTCCAACCCTCTTCTT	T/G	0	10802	-1	63	3	78	79	4	0.818182	A	B	B	B	B	A	B	A	A	-	A	A	A	B	B	A	A	A	A	-	-	B	A	A	B	B	A	A	A	A	A	A	B	-	A	A
*synopGBS1216	6.26	3B	TGCAGTCTATTTCACACTTCCATTCTATCTTCAGTTCTTCCAGAGCAGGTGCCCAACTCAGTA	A/G	0	14457	-1	13	2	85	83	5	0.871658	A	B	B	B	B	-	-	-	A	B	A	A	A	-	B	A	A	A	B	A	B	B	A	A	B	B	-	A	A	A	A	A	-	A	A	A
*synopGBS1217	6.26	3B	TGCAGTCTATTTCACACTTCCATTCTATCTTCAGTTCTTCCAGAGCAGGTGCCCAACTCAGTA	G/C	0	14458	-1	33	2	85	83	5	0.871658	A	B	B	B	B	-	-	-	A	B	A	A	A	-	B	A	A	A	B	A	B	B	A	A	B	B	-	A	A	A	A	A	-	A	A	A
*synopGBS506	8.61	3B	TGCAGCGCAAGATTGACGACGCCAAGCAATGGCATGCTACAGGAGCGGTAATGATGCAACACA	A/G	0	6976	-1	53	3	78	87	4	0.860963	A	B	B	-	B	-	B	A	A	B	A	-	A	-	B	A	A	A	B	A	-	B	A	-	B	B	A	A	B	A	A	A	B	A	-	A
*synopGBS732	8.61	3B	TGCAGGATACTTTCCTCATTATCCCAACTGGCTGCGATTCGGGAGTCTGAGTTCCAGGCGTTC	C/G	0	10254	-1	16	3	93	82	5	0.909091	A	B	B	B	B	-	B	A	-	B	A	A	A	B	B	-	A	A	B	-	B	B	A	-	B	B	A	A	B	A	A	A	B	A	-	-
*synopGBS1243	12.12	3B	TGCAGTGAACTTGGAAACCAGTTCATCCATGTTCGGCAGGCACTCCTTAGCACGCTCGTCGCC	A/T	0	14618	-1	8	2	86	73	3	0.834225	A	B	-	-	B	A	B	A	A	B	A	A	A	B	B	A	A	A	B	A	B	-	A	A	B	B	A	A	B	A	A	A	B	A	A	A
*synopGBS1244	12.12	3B	TGCAGTGAACTTGGAAACCAGTTCATCCATGTTCGGCAGGCACTCCTTAGCACGCTCGTCGCC	A/C	0	14619	-1	14	2	86	73	3	0.834225	A	B	-	-	B	A	B	A	A	B	A	A	A	B	B	A	A	A	B	A	B	-	A	A	B	B	A	A	B	A	A	A	B	A	A	A
*synopGBS1415	12.12	3B	TGCAGTTGACTTTCTACTCCAAACCCATCTCCCATGTTTTGCTAGACGTACAGAAGATTACAG	A/T	0	15982	-1	26	2	88	75	9	0.823529	A	B	B	B	B	-	B	A	-	B	A	A	A	-	B	A	A	-	B	A	B	B	A	A	B	B	A	-	-	A	-	-	B	-	-	A
*synopGBS845	12.12	3B	TGCAGGCTGACCGCACCCTGGCGGACTACAACATTCAGAGCGAGGATACCCTTTATTTGGGTC	C/T	0	11348	-1	62	3	86	79	6	0.850267	A	B	B	B	B	A	B	A	A	B	A	A	A	B	B	A	A	A	B	A	B	B	A	A	B	B	A	A	B	A	A	A	B	-	A	A
*synopGBS624	18.15	3B	TGCAGCTTACACGGTCGAGGGCGGGCTGGCGCGCACTGCGCATCGATCGATCTCCTCATCCGC	C/G	0	9029	-1	47	3	73	98	6	0.882353	A	B	B	-	B	A	B	A	-	B	A	A	-	B	B	A	A	A	B	A	B	B	A	A	B	B	A	A	B	A	A	A	B	-	A	A
*synopGBS625	18.15	3B	TGCAGCTTACACGGTCGAGGGCGGGCTGGCGCGCACTGCGCATCGATCGATCTCCTCATCCGC	C/A	0	9030	-1	53	3	73	98	6	0.882353	A	B	B	-	B	A	B	A	-	B	A	A	-	B	B	A	A	A	B	A	B	B	A	A	B	B	A	A	B	A	A	A	B	-	A	A
*synopGBS204	25.03	3B	TGCAGAGTCCCTTGGCAAGGCGAGGCCGTTTCAGGGCCTAAACGGCAGGGCGTTGGAGGTGGA	C/T	0	2204	-1	26	3	96	78	3	0.914439	A	B	B	B	B	A	B	A	-	B	-	A	A	B	B	A	A	A	A	B	B	B	A	A	B	B	A	A	B	A	A	A	B	B	A	A
*synopGBS755	39.7	3B	TGCAGGATTTTTGGCAGCATGCATGCGCTGGGTTGCCATGATTTTCTGATCATTTGCATGGCA	C/T	0	10423	-1	56	2	91	74	13	0.812834	A	B	B	B	-	A	-	A	-	-	A	A	-	B	B	A	B	B	A	B	-	B	A	-	A	B	-	A	B	A	A	A	-	-	A	-
*synopGBS1484	40.6	3B	TGCAGTTTTCAAAATTTTGACAGTCAATCAGCCGTTGATTTTTCTCTTAACTCTGCCGAACAA	A/G	0	16555	-1	29	3	88	65	3	0.802139	A	B	B	B	B	-	B	-	-	B	A	A	A	-	-	-	B	-	-	B	-	-	-	A	A	B	-	A	-	A	A	-	B	-	A	A
*synopGBS1485	40.6	3B	TGCAGTTTTCAAAATTTTGACAGTCAATCAGCCGTTGATTTTTCTCTTAACTCTGCCGAACAA	T/A	0	16556	-1	35	3	88	65	3	0.802139	A	B	B	B	B	-	B	-	-	B	A	A	A	-	-	-	B	-	-	B	-	-	-	A	A	B	-	A	-	A	A	-	B	-	A	A
*synopGBS353	40.6	3B	TGCAGCACATGCAACAATTGTCCGAATCCCCCAAAACATGGCCAAACAGACAACCCAGTGTTC	A/C	0	3981	-1	32	3	93	80	6	0.893048	A	B	B	-	B	A	B	A	A	B	A	A	A	B	B	A	B	B	A	B	-	B	A	A	A	B	A	A	B	A	A	A	B	B	A	A
*synopGBS787	40.6	3B	TGCAGGCAGTCGATTTTTCTACGGTTTGACCACAGGTCATGGGCGGCTGGGCGTATGTTCAAC	G/T	0	10649	-1	52	3	85	71	3	0.818182	A	B	-	-	B	-	-	-	A	B	A	A	A	B	B	-	B	B	A	B	B	B	A	A	A	-	A	A	-	A	A	-	-	B	A	A
*synopGBS512	51.78	3B	TGCAGCGCTAGTCCTAGCTGGAAACATAGAGAGGGAGGAGCGCTGACCAGAGAAGACAGCTTC	A/G	0	7220	-1	25	3	87	70	4	0.818182	A	B	B	B	B	A	-	A	A	B	A	B	A	B	B	A	B	-	A	B	-	A	A	A	A	-	A	A	B	A	A	A	B	B	A	A
*synopGBS1134	59.56	3B	TGCAGTATGCACATCCATGCATTTCTATTCTAGTGCCACTTAACTGCTCAAATGAACCATTAG	T/C	0	13765	-1	30	3	89	83	9	0.871658	A	B	A	A	B	A	A	A	B	B	B	B	A	B	B	A	B	-	A	-	B	A	A	A	A	B	-	B	B	A	A	-	B	B	A	A
*synopGBS1135	59.56	3B	TGCAGTATGCACATCCATGCATTTCTATTCTAGTGCCACTTAACTGCTCAAATGAACCATTAG	T/C	0	13766	-1	44	3	89	83	9	0.871658	A	B	A	A	B	A	A	A	B	B	B	B	A	B	B	A	B	-	A	-	B	A	A	A	A	B	-	B	B	A	A	-	B	B	A	A
*synopGBS1225	59.56	3B	TGCAGTCTGCACATCCATGCATTTCTATTCCAGTGCCACTTAACCGCTCAAATGAACCATTAG	C/T	0	14510	-1	30	2	83	88	9	0.86631	A	B	A	A	B	A	A	A	B	B	B	B	A	B	B	A	B	-	A	-	B	A	A	A	A	B	-	B	B	A	A	-	B	B	A	A
*synopGBS1226	59.56	3B	TGCAGTCTGCACATCCATGCATTTCTATTCCAGTGCCACTTAACCGCTCAAATGAACCATTAG	C/T	0	14511	-1	44	2	83	88	9	0.86631	A	B	A	A	B	A	A	A	B	B	B	B	A	B	B	A	B	-	A	-	B	A	A	A	A	B	-	B	B	A	A	-	B	B	A	A
*synopGBS1410	63.63	3B	TGCAGTTCTCCATGACGGCGTTCCAGCAAAACTCCATAGCGGTTGCAGCCAAAAACAGCGCCG	C/T	0	15908	-1	9	3	93	81	6	0.898396	A	B	A	-	B	B	A	-	B	-	B	B	A	B	B	A	B	B	A	A	B	A	A	-	A	B	A	B	B	A	A	A	B	B	A	A
*synopGBS488	63.63	3B	TGCAGCCTGCTACCATGTCGTTTCTTGCTGGACATACCTTCCAACGGTGACGGGGATGACTGC	G/T	0	6530	-1	19	3	83	82	7	0.84492	A	B	A	A	B	B	A	A	-	B	B	B	A	B	B	A	B	B	A	A	B	A	A	A	A	B	A	B	B	A	A	A	B	B	A	A
*synopGBS558	63.63	3B	TGCAGCTATAGCCGCCTGCACCAGTGGATTTGCAAGGACCTCCTCCAAGGGCCCCTCATTCGC	A/C	0	7943	-1	33	3	92	86	4	0.930481	A	B	A	-	B	-	A	A	B	B	B	B	A	B	B	A	B	B	A	A	B	A	A	A	A	B	A	B	B	A	A	A	B	B	A	A
*synopGBS559	63.63	3B	TGCAGCTATAGCCGCCTGCACCAGTGGATTTGCAAGGACCTCCTCCAAGGGCCCCTCATTCGC	A/G	0	7944	-1	46	3	92	89	7	0.930481	A	B	A	-	B	-	A	A	B	B	B	B	A	B	B	A	B	B	A	A	B	A	A	A	A	B	A	B	B	A	A	A	B	B	A	A
*synopGBS438	70.57	3B	TGCAGCCCATGCATCCATGGGGTCCGTCCATAGCCTTGCGAAGGCCACCACAAAGCTAGGAGG	T/C	0	5709	-1	56	3	78	81	7	0.812834	-	B	A	A	B	-	-	-	-	-	-	B	A	-	B	A	B	B	A	-	B	A	A	A	A	B	B	B	B	A	-	A	-	-	A	-
*synopGBS439	70.57	3B	TGCAGCCCATGCATCCATGGTGTCCGTCCATAGCCTTGCGAAGGCCACCACAAAGCCAGGAGG	C/T	0	5710	-1	56	1	81	78	7	0.812834	-	B	A	A	B	-	-	-	-	-	-	B	A	-	B	A	B	B	A	-	B	A	A	A	A	B	B	B	B	A	-	A	-	-	A	-
*synopGBS253	71.53	3B	TGCAGATCGGGGGGGAGGAGGAGATGTTTGAAAGATACTACGTCCTAGCAGTGAGGGGAGAGC	C/T	0	2734	-1	7	3	84	81	10	0.828877	A	B	-	-	B	B	A	A	-	B	B	B	A	B	B	-	-	-	A	A	-	-	A	A	A	B	B	B	B	-	A	A	B	B	A	-
*synopGBS1372	77.07	3B	TGCAGTTATGGAAACCGCTTAGCAAGCAACATGCTCAAGACGACATCGACCAGATCACCGTGG	A/G	0	15605	-1	27	3	76	82	5	0.818182	A	B	A	A	-	B	A	A	-	B	-	-	A	B	B	A	-	B	A	A	B	-	A	-	A	-	B	B	-	A	A	-	B	-	-	-
*synopGBS1373	77.07	3B	TGCAGTTATGGAAACCGCTTAGCAAGCAACATGCTCAAGACGACATCGACCAGATCACCGTGG	A/G	0	15606	-1	36	3	76	82	5	0.818182	A	B	A	A	-	B	A	A	-	B	-	-	A	B	B	A	-	B	A	A	B	-	A	-	A	-	B	B	-	A	A	-	B	-	-	-
*synopGBS1374	77.07	3B	TGCAGTTATGGAAACCGCTTAGCAAGCAACATGCTCAAGACGACATCGACCAGATCACCGTGG	T/C	0	15607	-1	45	3	76	82	5	0.818182	A	B	A	A	-	B	A	A	-	B	-	-	A	B	B	A	-	B	A	A	B	-	A	-	A	-	B	B	-	A	A	-	B	-	-	-
*synopGBS1227	78.85	3B	TGCAGTCTGCATGACCATGACAACTACTTGGTGAACTCGAGAGCCCAGAAGTTACCGAAGATG	A/G	0	14512	-1	19	3	87	92	7	0.919786	A	B	A	A	A	B	A	A	B	B	B	-	A	B	B	A	B	-	A	A	-	A	A	A	A	B	B	B	-	A	-	A	B	B	-	A
*synopGBS295	78.85	3B	TGCAGATGGGGCAGCTGCCCAGGATAAGGTGCCAGAAGCCGAGGTCAATGGGAAGGGCGGGCA	A/T	0	3053	-1	52	2	84	82	6	0.855615	A	B	-	A	A	B	A	-	-	B	B	B	A	-	B	A	B	B	-	A	B	A	A	-	A	B	B	B	B	A	A	A	B	-	A	A
*synopGBS537	78.85	3B	TGCAGCTACTCAAACTTTCGTCGACACTATGGAAGAGGATCGTGGGCGTCATAGCCACCTAGC	A/C	0	7795	-1	28	3	79	81	4	0.834225	A	B	A	-	A	B	-	A	-	B	B	B	A	B	-	A	B	B	A	-	B	A	A	-	A	B	-	B	B	A	A	-	B	B	A	A
*synopGBS1050	82.27	3B	TGCAGTAACCTTGATTCATGCCAGCTTCAGAGAACGTAATCTGAAAGGTCGTTTCAACAGATC	C/T	0	13170	-1	9	1	83	86	5	0.877005	A	B	A	-	-	B	A	A	B	B	-	B	A	B	B	A	B	-	A	-	B	A	A	A	A	-	B	B	B	A	A	A	A	B	-	A
*synopGBS1091	82.27	3B	TGCAGTAGAACGCCACTTGGCAGTTGGTGGTCATGCAAATGCAGGCAACGCAATGGACCTGCT	C/G	0	13475	-1	35	3	90	89	3	0.941176	A	B	A	B	-	B	A	A	B	B	B	B	A	B	B	A	B	B	A	A	B	A	A	A	A	B	-	B	B	A	A	A	A	B	A	A
*synopGBS484	82.27	3B	TGCAGCCTGAATTCTGGGCATTAGAGGAGGCACTGAAGCTTCGTCCTTATCTGAGTTCCTGGA	C/T	0	6489	-1	63	3	81	78	3	0.834225	A	B	-	B	A	B	A	-	B	-	-	B	A	B	B	A	B	B	A	A	-	-	A	A	A	B	B	B	B	A	-	A	A	B	A	A
*synopGBS1116	82.98	3B	TGCAGTAGGACTCTTTGGCCCAATACCCTCGGATACGCTTGGCAAGCTTGATGCCCTGGAGGC	A/C	0	13599	-1	22	3	93	89	5	0.946524	-	B	A	-	A	B	A	A	B	B	-	B	A	B	B	A	B	B	A	A	B	A	-	A	A	B	B	B	B	A	A	A	-	B	A	A
*synopGBS1250	84.46	3B	TGCAGTGACTGCCTCCGTGTGCAGGTAGTGTCTGAGAGCGGGGATGGCGACGCACTTCGTGCT	A/G	0	14680	-1	22	3	81	84	1	0.877005	A	B	-	B	A	B	A	A	-	B	B	B	-	B	B	A	B	B	A	A	B	A	A	A	A	B	B	B	B	A	A	-	A	B	A	A
*synopGBS409	86.17	3B	TGCAGCCAACCCTGCGCCAGCCTGCCATGCCCAGCTGCGCCCCGCTTTCTTGCCTTTGTCTCC	A/G	0	5160	-1	7	3	88	64	2	0.802139	A	B	A	-	A	B	A	A	B	B	B	B	A	B	B	A	B	-	A	A	B	-	A	A	A	B	B	B	B	A	A	A	A	B	A	-
*synopGBS410	86.17	3B	TGCAGCCAACCCTGCGCCAGCCTGCCATGCCCAGCTGCGCCCCGCTTTCTTGCCTTTGTCTCC	C/G	0	5161	-1	39	3	88	64	2	0.802139	A	B	A	-	A	B	A	A	B	B	B	B	A	B	B	A	B	-	A	A	B	-	A	A	A	B	B	B	B	A	A	A	A	B	A	-
*synopGBS411	86.17	3B	TGCAGCCAACCCTGCGCCAGCCTGCCATGCCCAGCTGCGCCCCGCTTTCTTGCCTTTGTCTCC	T/C	0	5162	-1	56	3	88	64	2	0.802139	A	B	A	-	A	B	A	A	B	B	B	B	A	B	B	A	B	-	A	A	B	-	A	A	A	B	B	B	B	A	A	A	A	B	A	-
*synopGBS652	88.06	3B	TGCAGCTTTCCATCTACGGATGCCGTTCATCTTCCACCGACTGTTTCCAAGATTCCGTCAGAG	A/G	0	9378	-1	28	3	68	87	1	0.823529	A	B	A	B	A	B	-	A	B	B	B	B	-	B	B	A	-	B	A	A	B	A	A	A	A	-	B	B	B	A	A	A	A	-	A	A
*synopGBS663	90.91	3B	TGCAGGAAAACACATGTCAAATCCCAAAACTTTTGCACAAATATACTGCTTGTAACGGACCGT	C/T	0	9461	-1	60	3	73	80	2	0.807487	A	B	A	B	-	-	-	A	-	B	B	B	A	-	B	A	B	B	A	-	B	A	A	A	A	B	B	B	B	A	A	-	A	B	A	A
*synopGBS1478	92.62	3B	TGCAGTTTGGGGCGATGACCTAATAATCCTAGCTTAGGTACAAGCACTTCACTCCCTCCCTTG	A/C	0	16498	-1	41	3	84	91	5	0.909091	A	B	-	B	A	-	A	A	B	B	B	B	B	-	B	A	B	B	A	A	B	A	A	A	A	B	B	B	B	A	-	A	A	B	A	A
*synopGBS696	92.62	3B	TGCAGGACATATTGGTGCTGCGAGAGCGCCTCCTCTAGTATTGGCAATGAGTTCTGCATCGAG	A/G	0	9800	-1	8	3	78	85	2	0.860963	A	B	A	B	A	B	-	A	B	B	B	B	B	B	B	A	B	B	A	A	B	A	A	A	A	B	B	-	B	A	A	A	A	B	A	A
*synopGBS697	92.62	3B	TGCAGGACATATTGGTGCTGCGAGAGCGCCTCCTCTAGTATTGGCAATGAGTTCTGCATCGAG	T/C	0	9801	-1	11	3	78	85	2	0.860963	A	B	A	B	A	B	-	A	B	B	B	B	B	B	B	A	B	B	A	A	B	A	A	A	A	B	B	-	B	A	A	A	A	B	A	A
*synopGBS831	94.25	3B	TGCAGGCGTTCTCAGCATTTCGGCATATGGGCCTCTACACTCCAGCCAGCCTGCGATGTGTCA	A/G	0	11255	-1	13	3	84	86	6	0.877005	A	B	A	B	A	B	A	A	-	B	A	B	B	-	B	A	B	B	A	-	B	A	A	A	A	B	B	B	B	-	-	A	A	-	A	A
*synopGBS247	95.93	3B	TGCAGATCGATCACCAAAAGGCCCGTAGAATCGCCAACGCCGCAAACGAACATACGGCGAAAT	G/T	0	2705	-1	58	3	90	76	6	0.855615	A	B	A	-	A	-	-	A	B	B	A	-	B	B	B	A	B	-	A	-	B	A	A	A	A	B	-	B	B	A	A	-	A	B	A	A
*synopGBS1224	99.5	3B	TGCAGTCTCTGGCGGCCGCGCTCGATGACGGCGAGGAGCCCATCACCGACAGGACCCTGACGC	C/T	0	14495	-1	28	3	82	74	2	0.823529	A	B	A	-	A	B	A	A	B	B	A	-	B	B	B	A	B	B	A	A	-	-	A	-	A	-	B	-	-	-	A	A	-	B	-	A
*synopGBS843	99.5	3B	TGCAGGCTCCTTTGTGCAGCGACCAGCAGCGAGTGTTGGCGCACGACCGCGAGGGGATGCTGG	A/G	0	11317	-1	27	3	78	79	5	0.812834	A	B	A	-	A	B	A	A	-	B	A	B	-	-	B	-	B	B	A	A	-	-	A	-	A	-	-	B	B	-	A	A	-	B	A	A
*synopGBS1270	100.35	3B	TGCAGTGCACAGGCGCCACGGGCTAACCACTACGCCACAGGGCAGCTCACGTTCCTATACAGG	A/G	0	14799	-1	56	1	78	77	3	0.812834	A	B	A	-	A	B	A	A	B	B	-	-	B	B	B	A	B	B	-	A	-	-	A	A	A	-	-	B	B	A	A	-	-	B	A	A
*synopGBS1278	100.35	3B	TGCAGTGCATTTGCTATGGTATGGTCTTCTACGGGGCATCGCTATGTCTCGCATTCAACTAGT	A/T	0	14874	-1	60	3	84	72	1	0.828877	A	B	A	-	A	-	A	A	B	B	-	-	B	-	B	-	B	B	A	A	B	A	A	-	A	-	B	B	B	A	A	A	A	B	A	-
*synopGBS1279	100.35	3B	TGCAGTGCATTTGCTATGGTATGGTCTTCTACGGGGCATCGCTATGTCTCGCATTCAACTAGT	G/T	0	14875	-1	61	3	84	72	1	0.828877	A	B	A	-	A	-	A	A	B	B	-	-	B	-	B	-	B	B	A	A	B	A	A	-	A	-	B	B	B	A	A	A	A	B	A	-
*synopGBS1280	100.35	3B	TGCAGTGCATTTGCTATGGTATGGTCTTCTACGGGGCATCGCTATGTCTCGCATTCAACTAGT	C/T	0	14876	-1	63	3	84	72	1	0.828877	A	B	A	-	A	-	A	A	B	B	-	-	B	-	B	-	B	B	A	A	B	A	A	-	A	-	B	B	B	A	A	A	A	B	A	-
*synopGBS315	100.35	3B	TGCAGATTCGCAAGCATGCAACTAGGCTTGGTGTGGAAGCTGGATTTGAGGGACATTTCTGGC	A/G	0	3229	-1	20	3	77	75	2	0.802139	A	B	A	B	A	B	A	-	B	B	A	B	-	B	B	A	B	-	A	A	-	A	A	A	A	-	B	B	B	A	A	-	-	-	-	A
*synopGBS344	100.35	3B	TGCAGCAAGTAAATCACATGCACTCCTCTTACCCAGTGTTGTCGAGTCACCCGACATCTCCTC	C/T	0	3747	-1	49	3	74	82	3	0.818182	A	B	A	-	A	B	A	A	B	B	A	B	B	B	B	A	B	B	A	-	B	A	A	-	-	-	B	B	B	A	A	A	A	B	A	A
*synopGBS1166	101.22	3B	TGCAGTCATCGTCGGCATCTGACACCTATGCTGCCGTGGTTCGCGCACTCGACGCGGCGCACA	A/G	0	14009	-1	16	3	82	72	1	0.818182	A	B	A	-	A	-	-	-	B	B	A	B	B	B	B	A	B	B	A	-	B	A	A	A	A	-	B	B	-	A	A	A	-	B	A	A
*synopGBS1312	102.05	3B	TGCAGTGGAGACCTCGAACCGTAGGTAGCAGTCGAAGCCCATCACCGCGGCCGCCAAGCCACC	A/C	0	15084	-1	56	1	74	83	3	0.823529	A	B	-	B	-	B	-	A	-	B	A	-	B	-	B	A	B	-	A	-	-	A	A	A	-	-	B	B	B	-	A	A	-	-	A	A
*synopGBS1418	102.05	3B	TGCAGTTGAGGAAGACAGGGGCGTCGGGGCTTGCGTCGTACCTGACTGTGTGGAGGAACAACG	A/G	0	15993	-1	16	3	78	77	2	0.818182	A	B	A	B	A	B	-	-	-	B	-	B	B	B	B	A	B	B	A	A	-	A	A	A	-	-	B	B	B	A	-	-	A	-	-	A
[truncated: 943 more rows]
[truncated: 128 more columns]
